# Supplementary material
Source: PubMed Central journal article supplement (PMC5824727)
Supplement: NIHMS920143-supplement-Supporting_Information.pdf [file NIHMS920143-supplement-Supporting_Information.pdf]

# Supporting information

## Gold-catalyzed Fluorination of Alkynyl Esters and Ketones: Access to Fluorinated 1,3-Dicarbonyl Compounds

Xiaojun Zeng,<sup>[a]</sup> Zhichao Lu,<sup>[b]</sup> Shiwen Liu,<sup>[a]</sup> Gerald B. Hammond<sup>[b], \*</sup> and Bo Xu<sup>[a], \*</sup>

<sup>[a]</sup>College of Chemistry, Chemical Engineering and Biotechnology, Donghua University, 2999 North Renmin Lu, Shanghai 201620, China; <sup>[b]</sup>Department of Chemistry, University of Louisville, Louisville, KY 40292, USA.

### Table of Contents

|                                                                          |      |
|--------------------------------------------------------------------------|------|
| 1. General .....                                                         | S2   |
| 2. General procedure for the synthesis of alkynyl ketones <b>1</b> ..... | S2   |
| 3. General procedure for the synthesis of alkynyl esters <b>4</b> .....  | S4   |
| 4. General procedure for fluorination of <b>1</b> or <b>4</b> .....      | S6   |
| 5. Copies of NMR Spectra for compounds <b>3</b> and <b>5</b> . .....     | S15  |
| 6. References .....                                                      | S106 |

## 1. General

Commercial reagents and solvents were obtained from the commercial providers and used without further purification. The products were purified using a commercial flash chromatography system or a regular glass column. TLC was developed on silica gel 60 F254 glass plates.  $^1\text{H}$  NMR (400 MHz) and  $^{13}\text{C}$  NMR (100 MHz) spectra were recorded on a Bruker NMR apparatus. The chemical shifts are reported in  $\delta$  (ppm) values ( $^1\text{H}$  and  $^{13}\text{C}$  NMR relative to  $\text{CHCl}_3$ ,  $\delta$  7.26 ppm for  $^1\text{H}$  NMR and  $\delta$  77.0 ppm for  $^{13}\text{C}$  NMR). Or alternatively,  $^1\text{H}$  NMR chemical shifts were referenced to tetramethylsilane signal (0 ppm). Multiplicities are recorded by s (singlet), d (doublet), t (triplet), q (quartet), p (pentet), h (hextet), m (multiplet) and br (broad). Coupling constants ( $J$ ), are reported in Hertz (Hz). GC analyses were performed using a Shimadzu GC-2010ultragas chromatography–mass spectrometry instrument equipped with a Shimadzu AOC-20s autosampler.

## 2. General procedure for the synthesis of alkynyl ketones **1**

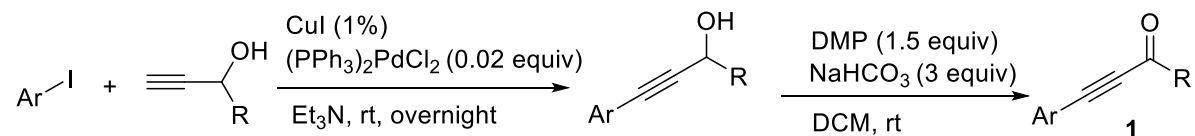

A mixture of aryl iodide (5 mmol), 3-butyne-2-ol or 1-octyne-3-ol (5.5 mmol) and (PPh<sub>3</sub>)<sub>2</sub>PdCl<sub>2</sub> (2 mol %) and Et<sub>3</sub>N (10 mL) was stirred for ten minutes at the room temperature, then CuI (1 mmol%) was added slowly. Finally, the reaction was stirred overnight at room temperature under a nitrogen atmosphere. Then the reaction was concentrated under reduced pressure and the residue was purified by flash chromatography to give the desired product propargyl alcohol derivatives.

Under stirring, a solution of propargyl alcohol derivatives (1 equiv) in DCM (20 mL) was added DMP (1.5 equiv) and NaHCO<sub>3</sub> (3 equiv). The reaction vessel was wrapped in aluminum foil to avoid light exposure. Finally, the reaction was monitored by TLC. Then the reaction was quenched by addition of saturated Na<sub>2</sub>SO<sub>3</sub> solution and extracted with DCM. The solvent was removed under reduced pressure and the residue was purified by flash chromatography to obtain the alkynone derivatives **1**.

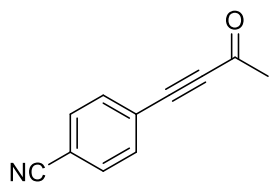

4-(3-Oxobut-1-yn-1-yl)benzonitrile (**1b**). White solid.  $^1\text{H}$  NMR (400 MHz,  $\text{CDCl}_3$ )  $\delta$  7.66 (q,  $J = 8.2$  Hz, 4H), 2.46 (s, 3H).  $^{13}\text{C}$  NMR (100 MHz,  $\text{CDCl}_3$ )  $\delta$  183.90, 133.20, 132.22, 124.68, 117.82, 113.96, 90.54, 86.81, 32.68. HRMS (ESI $^+$ ) calcd. for  $\text{C}_{11}\text{H}_8\text{NO}_2[\text{M}+\text{H}]^+$ : 170.0606, found:170.0600.

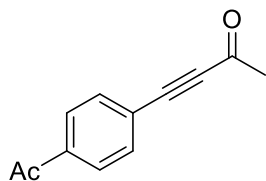

4-(4-Acetylphenyl)but-3-yn-2-one (**1e**). White solid.  $^1\text{H}$  NMR (400 MHz,  $\text{CDCl}_3$ )  $\delta$  7.93 (d,  $J = 8.2$  Hz, 2H), 7.62 (d,  $J = 8.2$  Hz, 2H), 2.59 (s, 3H), 2.44 (s, 3H).  $^{13}\text{C}$  NMR (100 MHz,  $\text{CDCl}_3$ )  $\delta$  196.97, 184.19, 138.02, 132.99, 128.28, 124.46, 89.97, 88.29, 32.72, 32.68, 26.64. HRMS (ESI $^+$ ) calcd. for  $\text{C}_{12}\text{H}_{11}\text{O}_2[\text{M}+\text{H}]^+$ :187.0759, found:187.0753.

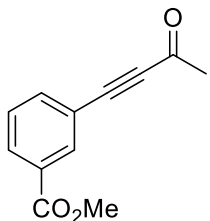

Methyl 3-(3-oxobut-1-yn-1-yl)benzoate (**1f**). White solid.  $^1\text{H}$  NMR (400 MHz,  $\text{CDCl}_3$ )  $\delta$  8.22 (s, 1H), 8.12 – 8.00 (m, 1H), 7.79 – 7.64 (m, 1H), 7.46 (t,  $J = 7.9$  Hz, 1H), 3.92 (s, 3H), 2.44 (s, 3H).  $^{13}\text{C}$  NMR (100 MHz,  $\text{CDCl}_3$ )  $\delta$  184.24, 165.75, 136.83, 134.02, 131.50, 130.79, 128.81, 120.39, 88.59, 88.52, 52.40, 32.69. HRMS (ESI $^+$ ) calcd. for  $\text{C}_{12}\text{H}_{11}\text{O}_3[\text{M}+\text{H}]^+$ : 203.0708, found:203.0720.

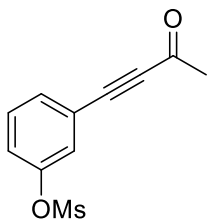

3-(3-Oxobut-1-yn-1-yl)phenyl methanesulfonate (**1g**). White solid.  $^1\text{H}$  NMR (400 MHz,  $\text{CDCl}_3$ )  $\delta$  7.57 – 7.34 (m, 4H), 3.17 (s, 3H), 2.44 (s, 3H).  $^{13}\text{C}$  NMR (100 MHz,  $\text{CDCl}_3$ )  $\delta$  184.13, 148.84, 131.79, 130.36, 126.15, 124.58, 121.97, 88.85, 87.58, 37.74, 32.68. HRMS (ESI $^+$ ) calcd. for  $\text{C}_{11}\text{H}_{11}\text{SO}_4[\text{M}+\text{H}]^+$ : 239.0378, found:239.0371.

### 3. General procedure for the synthesis of alkynyl esters **4**

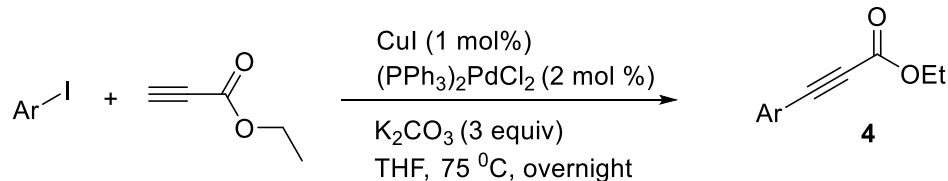

To a mixture of aryl iodide (5 mmol), ethyl propiolate (6 mmol) and (PPh<sub>3</sub>)<sub>2</sub>PdCl<sub>2</sub> (2 mol %) in THF (20 mL), K<sub>2</sub>CO<sub>3</sub> (15 mmol) was added. The reaction was stirred for 10 min at the room temperature, then CuI (1 mmol%) was added slowly. Finally, the reaction was stirred overnight at 75 °C under a nitrogen atmosphere. Then the solution was filtered, the filtrate was concentrated under deduced pressure and the residue was purified by flash silica gel chromatography to give the pure product **4**.

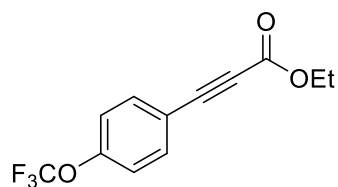

Ethyl 3-(4-(trifluoromethoxy)phenyl)propiolate (**4e**). Pale yellow oil. <sup>1</sup>H NMR (400 MHz, CDCl<sub>3</sub>) δ 7.66 – 7.58 (m, 2H), 7.22 (d, *J* = 8.1 Hz, 2H), 4.30 (q, *J* = 7.1 Hz, 2H), 1.36 (t, *J* = 7.1 Hz, 3H). <sup>19</sup>F NMR (376 MHz, CDCl<sub>3</sub>) δ -57.75. <sup>13</sup>C NMR (100 MHz, CDCl<sub>3</sub>) δ 153.77, 150.58, 135.67 – 133.74 (m), 120.24 (q, *J* = 258.8 Hz, 1H), 120.83 (d, *J* = 18.5 Hz), 118.24, 84.25, 81.30, 62.23, 14.01. HRMS (ESI<sup>+</sup>) calcd. for C<sub>12</sub>H<sub>9</sub>F<sub>3</sub>O<sub>3</sub>[M+H]<sup>+</sup>: 259.0582, found:259.0576.

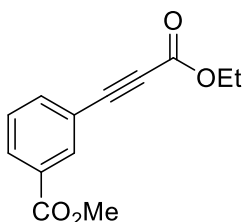

Methyl 3-(3-oxobut-1-yn-1-yl)benzoate (**4f**). White solid. <sup>1</sup>H NMR (400 MHz, CDCl<sub>3</sub>) δ 8.25 (s, 1H), 8.10 (d, *J* = 7.8 Hz, 1H), 7.74 (d, *J* = 7.6 Hz, 1H), 7.46 (t, *J* = 7.8 Hz, 1H), 4.30 (d, *J* = 7.1 Hz, 2H), 3.92 (s, 3H), 1.35 (t, *J* = 7.1 Hz, 3H). <sup>13</sup>C NMR (100 MHz, CDCl<sub>3</sub>) δ 165.77, 153.73, 136.78, 134.02, 131.44, 130.76, 128.75, 120.15, 84.54, 81.24, 62.20, 52.38, 14.04. HRMS (ESI<sup>+</sup>) calcd.

for C<sub>13</sub>H<sub>12</sub>O<sub>4</sub>[M+H]<sup>+</sup>: 233.0814, found:233.0807.

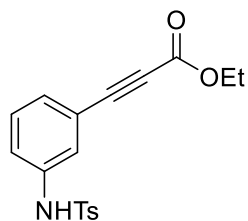

Ethyl 3-(3-((4-methylphenyl)sulfonamido)phenyl)propiolate (**4g**). Pale red solid.  $^1\text{H}$  NMR (400 MHz,  $\text{CDCl}_3$ )  $\delta$  7.66 (dd,  $J = 8.4, 2.0$  Hz, 2H), 7.25 (ddt,  $J = 17.2, 8.9, 2.5$  Hz, 6H), 4.28 (q,  $J = 7.1$  Hz, 2H), 2.37 (s, 3H), 1.34 (t,  $J = 7.1$  Hz, 2H).  $^{13}\text{C}$  NMR (100 MHz,  $\text{CDCl}_3$ )  $\delta$  153.90, 144.24, 137.17, 135.66, 129.80, 129.43, 127.23, 124.73, 123.20, 120.64, 85.01, 80.95, 76.71, 62.26, 14.03. HRMS (ESI $^+$ ) calcd. for  $\text{C}_{18}\text{H}_{18}\text{NSO}_4[\text{M}+\text{H}]^+$ : 344.0957, found:344.0949.

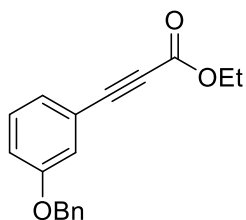

Ethyl 3-(3-(benzyloxy)phenyl)propiolate (**4h**). White solid.  $^1\text{H}$  NMR (400 MHz,  $\text{CDCl}_3$ )  $\delta$  7.57 – 7.24 (m, 6H), 7.19 (d,  $J = 8.1$  Hz, 2H), 7.06 (d,  $J = 7.6$  Hz, 1H), 5.05 (s, 2H), 4.29 (d,  $J = 7.0$  Hz, 2H), 1.35 (t,  $J = 7.0$  Hz, 3H).  $^{13}\text{C}$  NMR (100 MHz,  $\text{CDCl}_3$ )  $\delta$  158.51, 153.99, 136.32, 129.69, 128.62, 128.12, 127.41, 125.76, 120.60, 118.39, 118.28, 85.88, 80.43, 70.13, 62.08, 14.06. HRMS (ESI $^+$ ) calcd. for  $\text{C}_{18}\text{H}_{17}\text{O}_3[\text{M}+\text{H}]^+$ : 281.1178, found:281.1171.

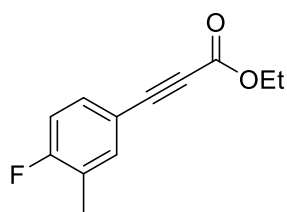

4-(4-Fluoro-3-methylphenyl)but-3-yn-2-one (**4i**). Pale yellow oil.  $^1\text{H}$  NMR (400 MHz,  $\text{CDCl}_3$ )  $\delta$  7.64 – 7.32 (m, 2H), 6.99 (t,  $J = 8.9$  Hz, 1H), 4.28 (d,  $J = 7.1$  Hz, 2H), 2.26 (s, 3H), 1.34 (t,  $J = 7.1$  Hz, 3H).  $^{19}\text{F}$  NMR (376 MHz,  $\text{CDCl}_3$ )  $\delta$  -110.97.  $^{13}\text{C}$  NMR (100 MHz,  $\text{CDCl}_3$ ) 162.57 (d,  $J = 252.1$  Hz), 154.01, 136.39 (d,  $J = 14.7$  Hz), 132.57 (d,  $J = 12.7$  Hz), 125.81 (d,  $J = 18.3$  Hz), 115.62 (d,  $J = 23.5$  Hz), 115.30 (d,  $J = 3.9$  Hz), 62.05, 14.25, 14.07. HRMS (ESI $^+$ ) calcd. for  $\text{C}_{12}\text{H}_{12}\text{FO}_2$   $[\text{M}+\text{H}]^+$ : 207.0821, found:207.0815.

#### 4. General procedure for fluorination of 1 or 4

A polypropylene vial was charged with alkynone **1** or alkynoate **4** (0.2 mmol, 1 equiv), 2,6-dibromopyridine N-oxide **2d** (0.28 mmol, 70 mg), and HF-pyridine (HF content 70 wt/wt%, 0.8 mmol, 27 mg, 4 equiv) and PhCF<sub>3</sub> (0.4 mL). The reaction was commenced by the addition of JohnPhosAuNTf<sub>2</sub> (5 mol%, 7.75 mg) and the reaction mixture was heated to 40 °C, the progress of the reaction was monitored by TLC. The reaction typically took 4 h or overnight to complete. Upon completion, the mixture was quenched with saturated sodium bicarbonate. The mixture was extracted with DCM and washed with 1N HCl. The organic layers were collected, dried over anhydrous MgSO<sub>4</sub> and filtered. The solvent was removed under reduced pressure and the residue was subjected to flash column chromatography purification (eluent: hexanes / ethyl acetate) to give 2-fluoro-1,3-dicarbonyl compounds **3** or **5**.

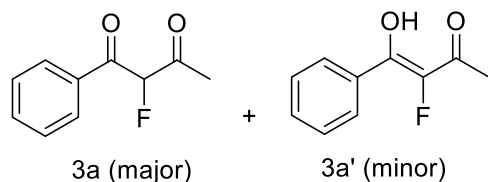

Colorless oil, 79% yield (28.4 mg), **3a/3a'** = 3.5/1. <sup>1</sup>H NMR (400 MHz, CDCl<sub>3</sub>) δ 13.74 (d, *J* = 3.5 Hz, 1H-minor), 8.04 (d, *J* = 7.8 Hz, 2H-major), 7.98 (d, *J* = 7.4 Hz, 1H-minor), 7.67 (t, *J* = 7.4 Hz, 1H-major), 7.53 (t, *J* = 7.7 Hz, 2H-major), 7.49 (d, *J* = 6.8 Hz, 1H-minor), 5.97 (d, *J* = 50.1 Hz, 1H-major), 2.38 (s, 3H-minor), 2.37 (d, *J* = 4.1 Hz, 3H-major). <sup>19</sup>F NMR (377 MHz, CDCl<sub>3</sub>) δ -170.10 (p, *J* = 4.3 Hz, 1F-minor), -189.58 (dq, *J* = 50.4, 4.8 Hz, 1F-major).

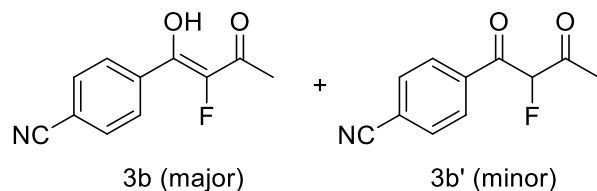

White solid, 80% yield (32.8 mg), **3b/3b'** = 6.5/1. <sup>1</sup>H NMR (400 MHz, CDCl<sub>3</sub>) δ 13.36 (s, 1H-major), 8.09 (d, *J* = 8.0 Hz, 2H-minor), 8.02 (d, *J* = 8.7 Hz, 2H-major), 7.79 (d, *J* = 8.6 Hz, 2H-minor), 7.74 (d, *J* = 8.4 Hz, 2H-major), 5.92 (d, *J* = 49.8 Hz, 1H-minor), 2.38 (d, *J* = 4.2 Hz, 3H-major), 2.35 (d, *J* = 4.1 Hz, 3H-minor). <sup>19</sup>F NMR (376 MHz, CDCl<sub>3</sub>) δ -167.71 (d, *J* = 4.3 Hz, 1F-major), -189.96 (dq, *J* = 49.9, 4.2 Hz, 1F-minor). <sup>13</sup>C NMR (100 MHz, CDCl<sub>3</sub>) δ 193.46 (d, *J* = 29.5 Hz, major), 159.88 (d, *J* = 19.8 Hz, major),

143.80 (d,  $J = 236.9$  Hz, major), 135.46 (d,  $J = 5.2$  Hz, minor), 132.49(major), 132.13(major), 130.05 (d,  $J = 3.4$  Hz, minor), 129.08(major), 128.99(major), 118.05(major), 114.88(minor), 96.57 (d,  $J = 200.0$  Hz), 26.10 (minor), 23.30 (major). HRMS (ESI<sup>+</sup>) calcd. for C<sub>11</sub>H<sub>9</sub>FNO<sub>2</sub> [M+H]<sup>+</sup>: 206.0617, found:206.0612.

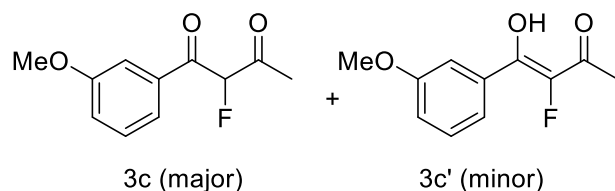

Pale yellow solid, 78% yield (32.7mg), **3b/3b'** = 2/1. <sup>1</sup>H NMR (400 MHz, CDCl<sub>3</sub>) δ 13.71 (s, 1H-minor), 7.59 (d,  $J = 7.3$  Hz, 1H-major), 7.54 (d,  $J = 7.8$  Hz, 1H-minor), 7.51 (s, 1H-major), 7.46 (s, 1H-minor), 7.44 – 7.35 (m, 1H-major), 7.40 – 7.31 (m, 1H-minor), 7.17 (d,  $J = 8.3$  Hz, 1H-major), 7.05 (d,  $J = 8.9$  Hz, 1H-minor), 5.90 (d,  $J = 50.1$  Hz, 1H-major), 3.85 (s, 3H-major), 3.84 (s, 3H-minor), 2.33 (d,  $J = 4.1$  Hz, 3H-major), 2.32 (d,  $J = 2.1$  Hz, 3H-minor). <sup>19</sup>F NMR (376 MHz, CDCl<sub>3</sub>) δ -169.51(s, 1F-minor), -189.31 (dq,  $J = 50.0, 4.3$  Hz, 1F-major). <sup>13</sup>C NMR (100 MHz, CDCl<sub>3</sub>) δ 200.45 (d,  $J = 24.2$  Hz, major), 190.22 (minor), 190.01 (d,  $J = 18.2$  Hz, major), 165.23 (d,  $J = 19.5$  Hz), 159.83(minor), 159.50(minor), 143.71 (d,  $J = 232.7$  Hz, minor), 134.65(major), 132.92 (d,  $J = 5.1$  Hz, minor), 129.80(major), 129.47(minor), 122.46 (d,  $J = 3.5$  Hz, major), 121.42(major), 121.36(minor), 121.25(minor), 118.21(major), 113.33(major), 96.49 (d,  $J = 198.1$  Hz, major), 55.47(major), 55.36, 25.92(major), 22.39(minor). HRMS (ESI<sup>+</sup>) calcd. for C<sub>11</sub>H<sub>12</sub>FO<sub>3</sub> [M+H]<sup>+</sup>: 211.0770, found:211.0766.

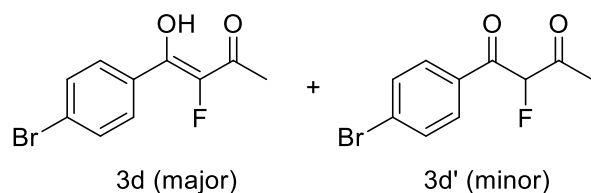

Pale yellow solid, 84% yield (43.2 mg), **3d/3d'** = 7/1. <sup>1</sup>H NMR (400 MHz, CDCl<sub>3</sub>) 13.60 (s, 1H-major), 7.87 (d,  $J = 8.3$  Hz, 2H-minor), 7.81 (d,  $J = 8.8$  Hz, 2H-major), 7.64 (d,  $J = 8.3$  Hz, 2H-minor), 7.59 (d,  $J = 8.5$  Hz, 2H-major), 5.88 (d,  $J = 50.2$  Hz, 1H-minor), 2.44 (d,  $J = 1.2$  Hz, 3H-minor), 2.34 (d,  $J = 4.1$  Hz, 3H-major). <sup>19</sup>F NMR (376 MHz, CDCl<sub>3</sub>) δ -169.32 (s, 1F-major), -189.53 (dd,  $J = 49.7, 4.3$  Hz, 1F-minor). <sup>13</sup>C NMR (100 MHz, CDCl<sub>3</sub>) δ 200.19 (d,  $J = 23.8$  Hz, minor), 190.55 (d,  $J = 29.0$  Hz, major), 163.79 (d,  $J = 19.5$  Hz, major), 143.65 (d,  $J = 233.1$  Hz, major), 134.26(minor), 132.18(minor), 131.79 (major), 131.06 (d,  $J = 3.3$  Hz, minor), 130.53 (d,  $J = 5.2$  Hz, minor), 130.20(major), 130.11(major), 126.75(major), 96.56

(d,  $J = 194.9$  Hz, minor), 25.94(minor), 22.49(major). HRMS (ESI<sup>+</sup>) calcd. for C<sub>10</sub>H<sub>9</sub>BrFO<sub>2</sub>[M+H]<sup>+</sup>: 258.9770, found:258.9764.

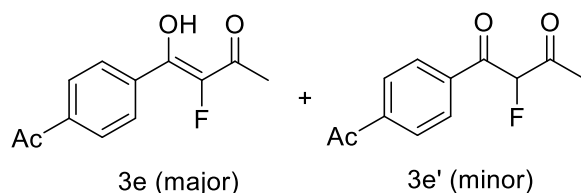

White solid, 92% yield (40.8 mg), **3e/3e'** = 16/1. <sup>1</sup>H NMR (400 MHz, CDCl<sub>3</sub>) δ 13.46 (s, 1H-major), 8.00 (s, 4H-major), 5.94 (d,  $J = 49.9$  Hz, 1H-minor), 2.62 (s, 3H), 2.36 (d,  $J = 4.2$  Hz, 4H). <sup>19</sup>F NMR (376 MHz, CDCl<sub>3</sub>) δ -168.37 (s, 1F-major), -189.87 (dq,  $J = 50.6, 4.2$  Hz, 1F-minor). <sup>13</sup>C NMR (100 MHz, CDCl<sub>3</sub>) for 3e major δ 197.34, 192.69 (d,  $J = 29.2$  Hz), 161.60 (d,  $J = 19.9$  Hz), 143.81 (d,  $J = 235.4$  Hz), 138.94, 135.47 (d,  $J = 5.3$  Hz), 128.79 (d,  $J = 8.9$  Hz), 128.19, 26.75, 23.10. HRMS (ESI<sup>+</sup>) calcd. for C<sub>12</sub>H<sub>12</sub>FO<sub>3</sub> [M+H]<sup>+</sup>: 223.0770, found:233.0765.

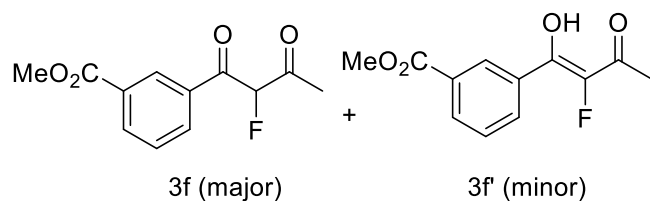

Pale yellow oil, 88% yield (41.8mg), **3f/3f'** = 10/9. <sup>1</sup>H NMR (400 MHz, CDCl<sub>3</sub>) δ 13.57 (s, 1H-minor), 8.63 (s, 1H-minor), 8.58 (s, 1H-major), 8.28 (d,  $J = 7.5$  Hz, 1H-minor), 8.17 (t,  $J = 7.7$  Hz, 2H-minor), 8.10 (d,  $J = 7.3$  Hz, 1H-major), 7.56 (dt,  $J = 16.0, 7.8$  Hz, 2H-major), 5.97 (d,  $J = 49.9$  Hz, 1H-major), 3.94 (d,  $J = 1.3$  Hz 3H-minor), 3.93 (d,  $J = 1.4$  Hz 3H-major), 2.36 (s, 3H-minor), 2.35 (s, 3H-major). <sup>19</sup>F NMR (376 MHz, CDCl<sub>3</sub>) δ -169.50(s, 1F-minor), -190.05 (dd,  $J = 50.0, 4.4$  Hz s, 1F-major). <sup>13</sup>C NMR (100 MHz, CDCl<sub>3</sub>) δ 200.30 (d,  $J = 24.2$  Hz, major), 190.96 (d,  $J = 29.1$  Hz), 189.62 (d,  $J = 19.3$  Hz, major), 166.25(major), 165.76(minor), 163.54 (d,  $J = 19.9$  Hz, minor), 143.68 (d,  $J = 233.6$  Hz, minor), 135.16(major), 133.74(minor), 133.60 (d,  $J = 3.3$  Hz, major), 132.76(minor), 132.64(major), 130.98(minor), 130.72 (d,  $J = 3.1$  Hz, minor), 130.59(major), 129.81 (d,  $J = 9.0$  Hz, minor), 129.04(minor), 128.66(major), 96.28 (d,  $J = 199.0$  Hz), 52.50, 52.35(major), 26.06(minor), 22.59(major). HRMS (EI<sup>+</sup>) calcd. for C<sub>12</sub>H<sub>10</sub>FO<sub>4</sub> [M-H]<sup>+</sup>: 237.0567, found: 237.0558.



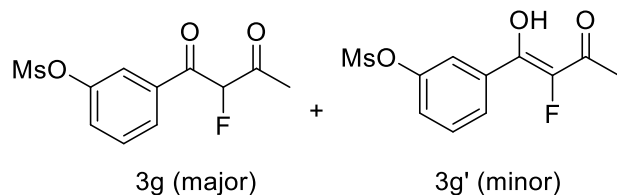

Pale yellow solid, 81% yield (44.3 mg), **3g/3g'** = 10/3.  $^1\text{H}$  NMR (400 MHz,  $\text{CDCl}_3$ )  $\delta$  13.49 (s, 1H-minor), 7.98 (d,  $J = 4.4$  Hz, 1H-major), 7.92 (s, 1H-minor), 7.90 (s, 1H-major), 7.83 (s, 1H-minor), 7.61 – 7.52 (m, 2H-major), 7.51 (d,  $J = 7.9$  Hz, 1H-minor), 7.44 (d,  $J = 8.2$  Hz, 1H-minor), 5.91 (d,  $J = 49.9$  Hz, 4H), 3.20 (s, 3H-major), 3.17 (s, 3H-minor), 2.36 (d,  $J = 4.0$  Hz, 3H-minor), 2.34 (d,  $J = 4.2$  Hz, 3H-major).  $^{19}\text{F}$  NMR (376 MHz,  $\text{CDCl}_3$ )  $\delta$  -168.83(s,1F-minor), -189.83 (dd,  $J = 49.8, 4.1$  Hz,1F-major).  $^{13}\text{C}$  NMR (100 MHz,  $\text{CDCl}_3$ )  $\delta$  200.12 (d,  $J = 23.7$  Hz, major), 191.62 (d,  $J = 29.3$  Hz), 188.80 (d,  $J = 19.5$  Hz, major), 162.06 (d,  $J = 19.6$  Hz), 149.24(major), 149.11(minor), 143.67 (d,  $J = 235.1$  Hz, minor), 135.09(major), 133.64 (d,  $J = 4.7$  Hz, minor), 130.57(major), 130.17(minor), 128.56 (d,  $J = 3.7$  Hz, major), 128.36(major), 127.52 (d,  $J = 9.3$  Hz, minor), 126.80 (minor), 125.41(major), 122.97 (d,  $J = 3.2$  Hz, major), 122.11 (d,  $J = 9.1$  Hz, minor), 121.36(minor), 96.56 (d,  $J = 199.4$  Hz, major), 37.77(major), 37.61(minor), 26.04 (major), 22.77(minor). HRMS (ESI $^+$ ) calcd. for  $\text{C}_{11}\text{H}_{12}\text{FSO}_5[\text{M}+\text{H}]^+$ : 275.0389, found: 275.0384.

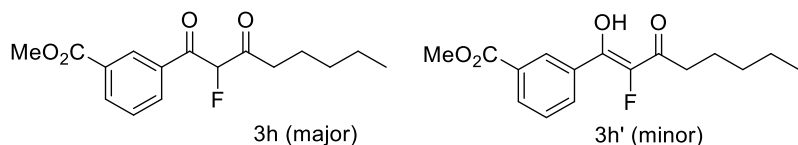

Colorless oil, 78% yield (34.6 mg), **3h/3h'** = 1.3/1. Major product **3h**:  $^1\text{H}$  NMR (400 MHz, Chloroform-*d*)  $\delta$  8.64 (s, 1H), 8.11-8.22 (m, 2H), 7.51-7.58 (m, 2H), 6.02 (d,  $J = 49.1$  Hz, 1H), 3.94 (s, 3H), 2.99 (t,  $J = 6.8$  Hz, 2H), 1.18 – 1.75 (m, 6H), 0.91 - 0.94 (m, 3H).  $^{19}\text{F}$  NMR (376 MHz, Chloroform-*d*)  $\delta$  -171.07 (s) (s,1F-minor), -192.05 (d,  $J = 49.1$  Hz, 1F-major). HRMS (ESI $^+$ ) calcd. for  $\text{C}_{16}\text{H}_{20}\text{FO}_4[\text{M}+\text{H}]^+$ : 295.1346, found: 259.1340.

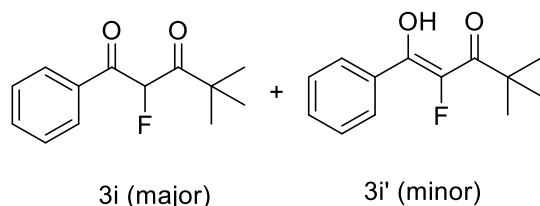

Colorless oil, 78% yield (34.6 mg), **3i/3i'** = 5/1. Major product:  $^1\text{H}$  NMR (400 MHz, Chloroform-*d*)  $\delta$  8.01 (d,  $J = 8.4$  Hz, 2H), 7.62 (t,  $J = 7.2$  Hz, 1H), 7.49 (t,  $J = 7.4$  Hz, 2H), 6.14 (dd,  $J = 49.1$  Hz, 1H), 1.24 (s, 9H).  $^{19}\text{F}$  NMR (376 MHz, Chloroform-*d*)  $\delta$  -167.60, (s, 1F-minor), -187.14 (d,  $J = 49.0$  Hz, 1F-major). It is spectroscopic data is consistent with literature report.<sup>2</sup>

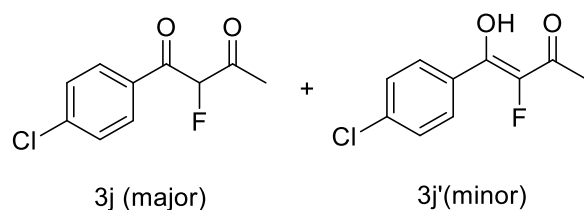

Pale yellow solid, 81% yield (34.6 mg), **3j/3j'** = 2/1.  $^1\text{H}$  NMR (500 MHz, Chloroform-*d*)  $\delta$  13.65 (s, 1H-minor), 7.97 (d,  $J = 8.3$  Hz, 2H-major), 7.91 (d,  $J = 8.4$  Hz, 2H-minor), 7.49 (d,  $J = 8.4$  Hz, 2H-major), 7.45 (d,  $J = 8.5$  Hz, 2H-minor), 5.91 (d,  $J = 50.1$  Hz, 1H-major), 2.35 (s, 3H-major), 2.35 (s, 3H-minor).  $^{19}\text{F}$  NMR (376 MHz, Chloroform-*d*)  $\delta$  -169.43(s,1F-minor), -189.53 (d,  $J = 50.2$  Hz,1F-major). It is spectroscopic data is consistent with literature report.<sup>3</sup>

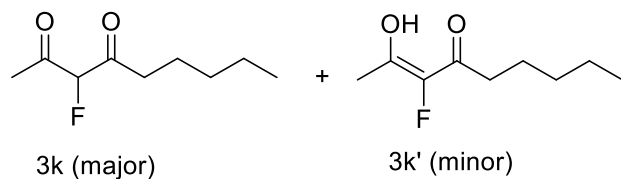

Colorless oil, 63% yield (21.9 mg), **3k/3k'** = 5/2.  $^1\text{H}$  NMR (400 MHz, Chloroform-*d*)  $\delta$  12.88 (s, 0.4H-minor), 5.23 (d,  $J = 50.7$  Hz, 1H-major), 2.72 – 2.39 (m, 2H-major,0.8H-minor), 2.29 (d,  $J = 4.0$  Hz, 3H-major), 2.16 (d,  $J = 3.8$  Hz, 1.2H-minor), 1.68 – 1.55 (m, 2H-major,0.8H-minor), 1.38 – 1.25 (m, 4H-major,1.6 H-minor), 0.96 – 0.75 (m, 3H-major,1.2H-minor).  $^{19}\text{F}$  NMR (376 MHz, Chloroform-*d*)  $\delta$  -174.63(s,1F-minor), -193.08 (d,  $J = 50.6$  Hz, 1F-major). It is spectroscopic data is consistent with literature report.<sup>2</sup>

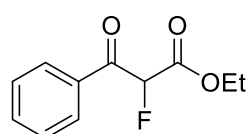

Ethyl 2-fluoro-3-oxo-3-phenylpropanoate<sup>1</sup> (**5a**). Colorless oil, 81% yield (34 mg).  $^1\text{H}$  NMR (400 MHz,  $\text{CDCl}_3$ )  $\delta$  8.28 – 7.86 (m, 2H), 7.69 – 7.54 (m, 1H), 7.54 – 7.43

(m, 2H), 5.85 (dd,  $J = 48.8$ , 1.7 Hz, 1H), 4.29 (qt,  $J = 9.2$ , 2.6 Hz, 2H), 1.37 – 1.15 (m, 3H).  $^{19}\text{F}$  NMR (376 MHz,  $\text{CDCl}_3$ )  $\delta$  -190.36 (d,  $J = 48.8$  Hz).

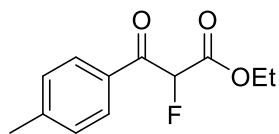

ethyl 2-fluoro-3-oxo-3-(p-tolyl)propanoate<sup>4</sup> (**5b**). Colorless oil, 80% yield (36.2 mg).  $^1\text{H}$  NMR (400 MHz,  $\text{CDCl}_3$ )  $\delta$  8.05 – 7.73 (m, 2H), 7.29 (d,  $J = 7.9$  Hz, 2H), 5.83 (d,  $J = 48.9$  Hz, 1H), 4.29 (dt,  $J = 7.1$ , 3.4 Hz, 2H), 2.42 (s, 3H), 1.25 (t,  $J = 7.0$  Hz, 3H).  $^{19}\text{F}$  NMR (376 MHz,  $\text{CDCl}_3$ )  $\delta$  -190.26 (d,  $J = 48.6$  Hz).

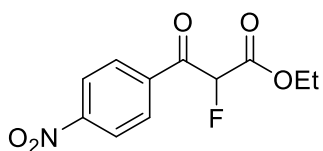

Ethyl 2-fluoro-3-(4-nitrophenyl)-3-oxopropanoate (**5c**). Pale yellow oil, 77% yield (39.2 mg).  $^1\text{H}$  NMR (400 MHz,  $\text{CDCl}_3$ )  $\delta$  8.51 – 8.27 (m, 2H), 8.29 – 8.10 (m, 2H), 5.84 (dd,  $J = 48.7$ , 0.8 Hz, 1H), 4.46 – 4.11 (m, 2H), 1.28 (td,  $J = 7.1$ , 0.7 Hz, 3H).  $^{19}\text{F}$  NMR (376 MHz,  $\text{CDCl}_3$ )  $\delta$  -190.19 (d,  $J = 48.9$  Hz).  $^{13}\text{C}$  NMR (100 MHz,  $\text{CDCl}_3$ )  $\delta$  188.52 (d,  $J = 21.7$  Hz), 164.17 (d,  $J = 24.1$  Hz), 150.92, 137.62, 130.66, 123.92, 90.49 (d,  $J = 196.5$  Hz), 63.17, 13.93. HRMS (ESI<sup>+</sup>) calcd. for  $\text{C}_{11}\text{H}_{11}\text{FNO}_5$  [ $\text{M}+\text{H}$ ]<sup>+</sup>: 256.0621, found:256.0615.

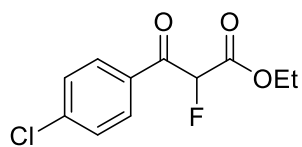

Ethyl 3-(4-chlorophenyl)-2-fluoro-3-oxopropanoate<sup>4</sup> (**5d**). Pale yellow oil, 87% yield (42.4 mg).  $^1\text{H}$  NMR (400 MHz,  $\text{CDCl}_3$ )  $\delta$  8.26 – 7.77 (m, 2H), 7.62 – 7.26 (m, 2H), 5.80 (d,  $J = 48.9$  Hz, 1H), 4.29 (dd,  $J = 7.0$ , 2.9 Hz, 2H), 1.25 (t,  $J = 7.1$  Hz, 3H).  $^{19}\text{F}$  NMR (376 MHz,  $\text{CDCl}_3$ )  $\delta$  -190.01 (d,  $J = 48.8$  Hz).

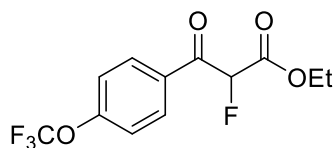

Ethyl 2-fluoro-3-oxo-3-(4-(trifluoromethoxy)phenyl)propanoate (**5e**). Pale yellow oil, 80% yield (47 mg).  $^1\text{H}$  NMR (400 MHz,  $\text{CDCl}_3$ )  $\delta$  8.10 (d,  $J = 8.8$  Hz, 2H), 7.31 (d,  $J = 8.3$  Hz, 2H), 5.80 (d,  $J = 48.8$  Hz, 1H), 4.30 (dd,  $J = 7.0$ , 3.1 Hz, 2H), 1.26 (t,  $J = 7.1$  Hz, 3H).  $^{19}\text{F}$  NMR (376 MHz,  $\text{CDCl}_3$ )  $\delta$  -57.65, -189.93 (d,  $J = 49.0$  Hz).  $^{13}\text{C}$  NMR (100 MHz,  $\text{CDCl}_3$ )  $\delta$  188.13 (d,  $J = 20.8$  Hz), 164.61 (d,  $J = 24.1$  Hz), 153.54, 131.72 (d,  $J = 4.0$  Hz), 131.37, 120.34, 120.18 (q,  $J = 259.5$  Hz), 90.30 (d,  $J = 198.3$  Hz), 62.84, 13.89. HRMS (ESI<sup>+</sup>) calcd. for  $\text{C}_{12}\text{H}_{11}\text{F}_4\text{O}_4$  [ $\text{M}+\text{H}$ ]<sup>+</sup>: 294.0593, found:259.05888.

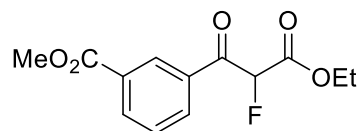

Methyl 3-(3-ethoxy-2-fluoro-3-oxopropanoyl)benzoate (**5f**). Colorless oil, 85% yield (45 mg).  $^1\text{H NMR}$  (400 MHz,  $\text{CDCl}_3$ )  $\delta$  8.66 (s, 1H), 8.28 (d,  $J = 6.6$  Hz, 1H), 8.21 (d,  $J = 7.7$  Hz, 1H), 7.59 (t,  $J = 7.8$  Hz, 1H), 5.90 (d,  $J = 48.6$  Hz, 1H), 4.29 (q,  $J = 4.9, 4.3$  Hz, 2H), 3.94 (s, 3H), 1.55 – 0.89 (m, 3H).  $^{19}\text{F NMR}$  (376 MHz,  $\text{CDCl}_3$ )  $\delta$  -190.89 (d,  $J = 48.7$  Hz).  $^{13}\text{C NMR}$  (100 MHz,  $\text{CDCl}_3$ )  $\delta$  188.90 (d,  $J = 20.6$  Hz), 165.78, 164.51 (d,  $J = 23.9$  Hz), 135.11, 133.62, 133.44 (d,  $J = 3.7$  Hz), 131.00, 130.54 (d,  $J = 3.2$  Hz), 129.07, 89.88 (d,  $J = 198.0$  Hz), 62.81, 52.49, 13.89. HRMS (ESI<sup>+</sup>) calcd. for  $\text{C}_{13}\text{H}_{14}\text{FO}_5$  [ $\text{M}+\text{H}$ ]<sup>+</sup>: 269.0825, found: 269.0819

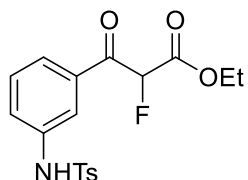

Ethyl 2-fluoro-3-(3-((4-methylphenyl)sulfonamido)phenyl)-3-oxopropanoate (**5g**). Pale yellow solid, 91% yield (68.9 mg).  $^1\text{H NMR}$  (400 MHz,  $\text{CDCl}_3$ )  $\delta$  7.72 (dd,  $J = 14.1, 8.0$  Hz, 4H), 7.45 (d,  $J = 8.0$  Hz, 1H), 7.37 (t,  $J = 7.9$  Hz, 1H), 7.30 – 7.16 (m, 2H), 5.78 (d,  $J = 48.7$  Hz, 1H), 4.27 (q,  $J = 7.1$  Hz, 2H), 2.36 (s, 3H), 1.23 (t,  $J = 7.1$  Hz, 3H).  $^{19}\text{F NMR}$  (376 MHz,  $\text{CDCl}_3$ )  $\delta$  -190.31 (d,  $J = 48.6$  Hz).  $^{13}\text{C NMR}$  (100 MHz,  $\text{CDCl}_3$ )  $\delta$  188.91 (d,  $J = 20.5$  Hz), 164.67 (d,  $J = 24.0$  Hz), 144.26, 135.76, 134.28, 129.80, 127.27, 126.54, 125.84 (d,  $J = 3.8$  Hz), 121.18 (d,  $J = 3.3$  Hz), 89.91 (d,  $J = 196.1$  Hz), 62.83, 21.51, 13.89. HRMS (ESI<sup>+</sup>) calcd. for  $\text{C}_{18}\text{H}_{19}\text{NSFO}_5$  [ $\text{M}+\text{H}$ ]<sup>+</sup>: 380.0968, found: 380.0962.

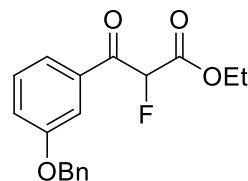

Ethyl 3-(3-(benzyloxy)phenyl)-2-fluoro-3-oxopropanoate (**5h**). Pale yellow oil, 88% yield (55.6 mg).  $^1\text{H NMR}$  (400 MHz,  $\text{CDCl}_3$ )  $\delta$  8.20 – 7.52 (m, 2H), 7.55 – 7.29 (m, 6H), 5.83 (d,  $J = 48.8$  Hz, 1H), 5.11 (s, 2H), 4.29 (q,  $J = 7.1$  Hz, 2H), 1.25 (t,  $J = 7.2$  Hz, 3H).  $^{19}\text{F NMR}$  (376 MHz,  $\text{CDCl}_3$ )  $\delta$  -190.09 (d,  $J = 48.7$  Hz).  $^{13}\text{C NMR}$  (100 MHz,  $\text{CDCl}_3$ )  $\delta$  189.21 (d,  $J = 20.1$  Hz), 164.85 (d,  $J = 24.2$  Hz), 159.01, 136.23, 134.58, 129.87, 128.64, 128.18, 127.55, 122.41 (d,  $J = 4.0$  Hz), 122.05, 114.39 (d,  $J = 2.9$  Hz), 89.99 (d,  $J = 197.6$  Hz), 70.23, 62.68, 13.94. HRMS (ESI<sup>+</sup>) calcd. for  $\text{C}_{18}\text{H}_{18}\text{FO}_4$  [ $\text{M}+\text{H}$ ]<sup>+</sup>: 317.1189, found: 317.1182.

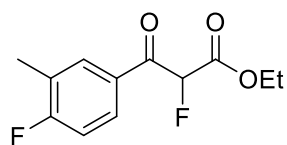

Ethyl 3-(4-fluoro-3-methylphenyl)propiolate (**5i**). Colorless oil, 87% yield (42.1 mg).  $^1\text{H NMR}$  (400 MHz,  $\text{CDCl}_3$ )  $\delta$  7.91 (t,  $J = 7.2$  Hz, 2H), 7.10 (t,  $J = 8.8$  Hz, 1H), 5.80 (d,  $J = 48.9$  Hz, 1H), 4.35 – 4.21 (m, 2H), 2.32 (s, 3H), 1.26 (t,  $J = 7.1$  Hz, 3H).  $^{19}\text{F NMR}$  (376 MHz,  $\text{CDCl}_3$ )  $\delta$  -106.01, -189.69 (d,  $J = 48.9$  Hz).  $^{13}\text{C NMR}$  (100 MHz,  $\text{CDCl}_3$ )  $\delta$  188.16 (d,  $J = 20.4$  Hz), 164.85 (d,  $J = 24.1$  Hz), 165.16 (d,  $J = 256.4$  Hz), 133.39 (d,  $J = 3.5$  Hz), 129.76

(d,  $J = 5.8$  Hz), 129.45, 125.99 (d,  $J = 18.0$  Hz), 115.60 (d,  $J = 23.3$  Hz), 62.70, 14.50, 13.92. HRMS (ESI<sup>+</sup>) calcd. for C<sub>12</sub>H<sub>13</sub>F<sub>2</sub>O<sub>3</sub> [M+H]<sup>+</sup>: 242.0833, found:243.0826.

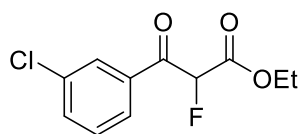

Ethyl 3-(3-chlorophenyl)-2-fluoro-3-oxopropanoate (**5j**). Colorless oil, 83% yield (40.5 mg). <sup>1</sup>H NMR (400 MHz, CDCl<sub>3</sub>) δ 8.00 (s, 1H), 7.92 (d,  $J = 7.5$  Hz, 1H), 7.60 (d,  $J = 7.2$  Hz, 1H), 7.44 (t,  $J = 7.9$  Hz, 1H), 5.81 (d,  $J = 48.7$  Hz, 1H), 4.30 (dd,  $J = 7.1, 2.9$  Hz, 2H), 1.27 (t,  $J = 7.0$  Hz, 3H). <sup>19</sup>F NMR (376 MHz, CDCl<sub>3</sub>) δ -190.36 (d,  $J = 49.0$  Hz). <sup>13</sup>C NMR (100 MHz, CDCl<sub>3</sub>) δ 188.45 (d,  $J = 20.8$  Hz), 164.48 (d,  $J = 23.9$  Hz), 135.21, 134.77, 134.42, 130.11, 129.40 (d,  $J = 3.5$  Hz), 127.62 (d,  $J = 4.2$  Hz), 90.07 (d,  $J = 199.7$  Hz), 62.87, 13.92. HRMS (ESI<sup>+</sup>) calcd. for C<sub>11</sub>H<sub>11</sub>ClFO<sub>3</sub> [M+H]<sup>+</sup>: 245.0381, found:245.0375.

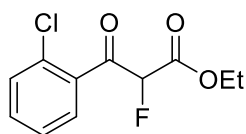

Ethyl 3-(2-chlorophenyl)-2-fluoro-3-oxopropanoate (**5k**). Colorless oil, 35% yield (17 mg). <sup>1</sup>H NMR (400 MHz, CDCl<sub>3</sub>) δ 7.53 (d,  $J = 7.4$  Hz, 1H), 7.54 – 7.41 (m, 2H), 7.40 – 7.30 (m, 1H), 5.94 (d,  $J = 48.2$  Hz, 1H), 4.49 – 3.90 (m, 2H), 1.24 (t,  $J = 7.1$  Hz, 3H). <sup>19</sup>F NMR (376 MHz, CDCl<sub>3</sub>) δ -192.38 (d,  $J = 48.3$  Hz). <sup>13</sup>C NMR (100 MHz, CDCl<sub>3</sub>) δ 192.48 (d,  $J = 23.0$  Hz), 163.96 (d,  $J = 24.2$  Hz), 134.96, 133.04, 131.95, 130.60, 130.05 (d,  $J = 2.8$  Hz), 126.92, 90.43 (d,  $J = 199.2$  Hz), 62.70, 13.88. HRMS (ESI<sup>+</sup>) calcd. for C<sub>11</sub>H<sub>11</sub>ClFO<sub>3</sub> [M+H]<sup>+</sup>: 245.0381, found:245.0374.

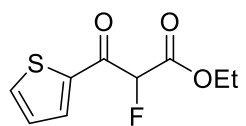

Ethyl 2-fluoro-3-oxo-3-(thiophen-2-yl)propanoate<sup>4</sup> (**5l**). Colorless oil, 84% yield (36.2 mg). <sup>1</sup>H NMR (400 MHz, CDCl<sub>3</sub>) δ 8.01 (s, 1H), 7.78 (d,  $J = 4.9$  Hz, 1H), 7.18 (d,  $J = 4.8$  Hz, 1H), 5.68 (d,  $J = 48.9$  Hz, 1H), 4.57 – 3.77 (m, 2H), 1.27 (t,  $J = 7.1$  Hz, 3H). <sup>19</sup>F NMR (376 MHz, CDCl<sub>3</sub>) δ -189.23 (d,  $J = 48.4$  Hz). <sup>13</sup>C NMR (100 MHz, CDCl<sub>3</sub>) δ 182.32 (d,  $J = 21.8$  Hz), 164.55 (d,  $J = 24.4$  Hz), 139.53, 136.21, 135.33 (d,  $J = 6.9$  Hz), 128.66, 90.52 (d,  $J = 198.8$  Hz), 62.77, 13.94.

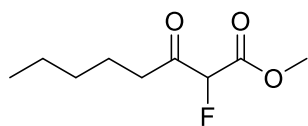

Methyl 2-fluoro-3-oxooctanoate (**5m**). Colorless oil, 86% yield (37.4 mg). <sup>1</sup>H NMR (400 MHz, CDCl<sub>3</sub>) δ 5.20 (d,  $J = 49.4$  Hz, 1H), 3.84 (s, 3H), 2.65 (qd,  $J = 7.2, 3.0$  Hz, 2H), 1.58-1.62 (m, 2H), 1.26-1.28 (m, 4H), 0.88 (t,  $J = 6.7$  Hz,

3H).  $^{19}\text{F}$  NMR (376 MHz,  $\text{CDCl}_3$ )  $\delta$  -194.92 (d,  $J = 49.6$  Hz).  $^{13}\text{C}$  NMR (100 MHz,  $\text{CDCl}_3$ )  $\delta$  201.30 (d,  $J = 23.0$  Hz), 164.62 (d,  $J = 24.2$  Hz), 91.26 (d,  $J = 198.5$  Hz), 53.13, 38.39, 31.04, 22.30 (d,  $J = 3.8$  Hz), 13.79.

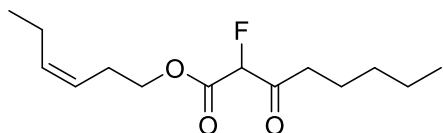

(*Z*)-hex-3-en-1-yl 2-fluoro-3-oxononanoate (**5n**). Colorless oil, 68% yield (37 mg).  $^1\text{H}$  NMR (500 MHz,  $\text{CDCl}_3$ )  $\delta$  5.71 – 5.43 (m, 1H), 5.29 (ddq,  $J = 8.9, 3.3, 1.6$  Hz, 1H), 5.20 (d,  $J = 49.5$  Hz, 1H), 4.24 (t,  $J = 7.0$  Hz, 2H), 2.80 – 2.57 (m, 2H), 2.55 – 2.30 (m, 2H), 2.06 (td,  $J = 7.5, 1.7$  Hz, 2H), 1.61 (q,  $J = 7.3$  Hz, 2H), 1.29 (q,  $J = 2.9, 2.4$  Hz, 4H), 0.98 (t,  $J = 7.5$  Hz, 3H), 0.89 (t,  $J = 6.9$  Hz, 3H).  $^{19}\text{F}$  NMR (376 MHz,  $\text{CDCl}_3$ )  $\delta$  -194.70 (d,  $J = 49.7$  Hz).  $^{13}\text{C}$  NMR (100 MHz,  $\text{CDCl}_3$ )  $\delta$  201.24 (d,  $J = 22.6$  Hz), 164.20 (d,  $J = 24.0$  Hz), 122.63 (d,  $J = 12.9$  Hz), 91.23 (d,  $J = 197.1$  Hz), 65.88, 38.43, 31.43, 28.59, 26.47, 22.52 (d,  $J = 21.4$  Hz), 20.58, 13.99. HRMS (ESI $^+$ ) calcd. for  $\text{C}_{15}\text{H}_{26}\text{FO}_3$ : 273.1866, found:273.1860.

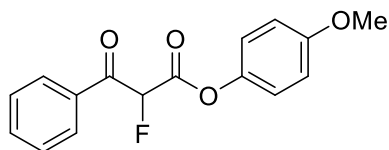

4-Methoxyphenyl 2-fluoro-3-oxo-3-phenylpropanoate (**5o**). Colorless oil, 90% yield (51.8 mg).  $^1\text{H}$  NMR (400 MHz,  $\text{CDCl}_3$ )  $\delta$  8.09 (d,  $J = 7.7$  Hz, 1H), 7.66 (t,  $J = 6.8$  Hz, 1H), 7.53 (t,  $J = 7.9$  Hz, 2H), 6.99 (d,  $J = 8.9$  Hz, 2H), 6.85 (d,  $J = 9.0$  Hz, 2H), 6.09 (d,  $J = 48.6$  Hz, 1H), 3.77 (s, 2H).  $^{19}\text{F}$  NMR (376 MHz,  $\text{CDCl}_3$ )  $\delta$  -189.89 (d,  $J = 48.5$  Hz).  $^{13}\text{C}$  NMR (100 MHz,  $\text{CDCl}_3$ )  $\delta$  189.15 (d,  $J = 20.1$  Hz), 163.93 (d,  $J = 24.7$  Hz), 157.77, 143.23, 134.71, 133.34, 128.95, 121.77, 114.55, 89.74 (d,  $J = 196.2$  Hz), 55.55. HRMS (ESI $^+$ ) calcd. for  $\text{C}_{16}\text{H}_{14}\text{FO}_4$ [ $\text{M}+\text{H}$ ] $^+$ : 289.0876, found:289.0870.

## 5. Copies of NMR Spectra for compounds 3 and 5.

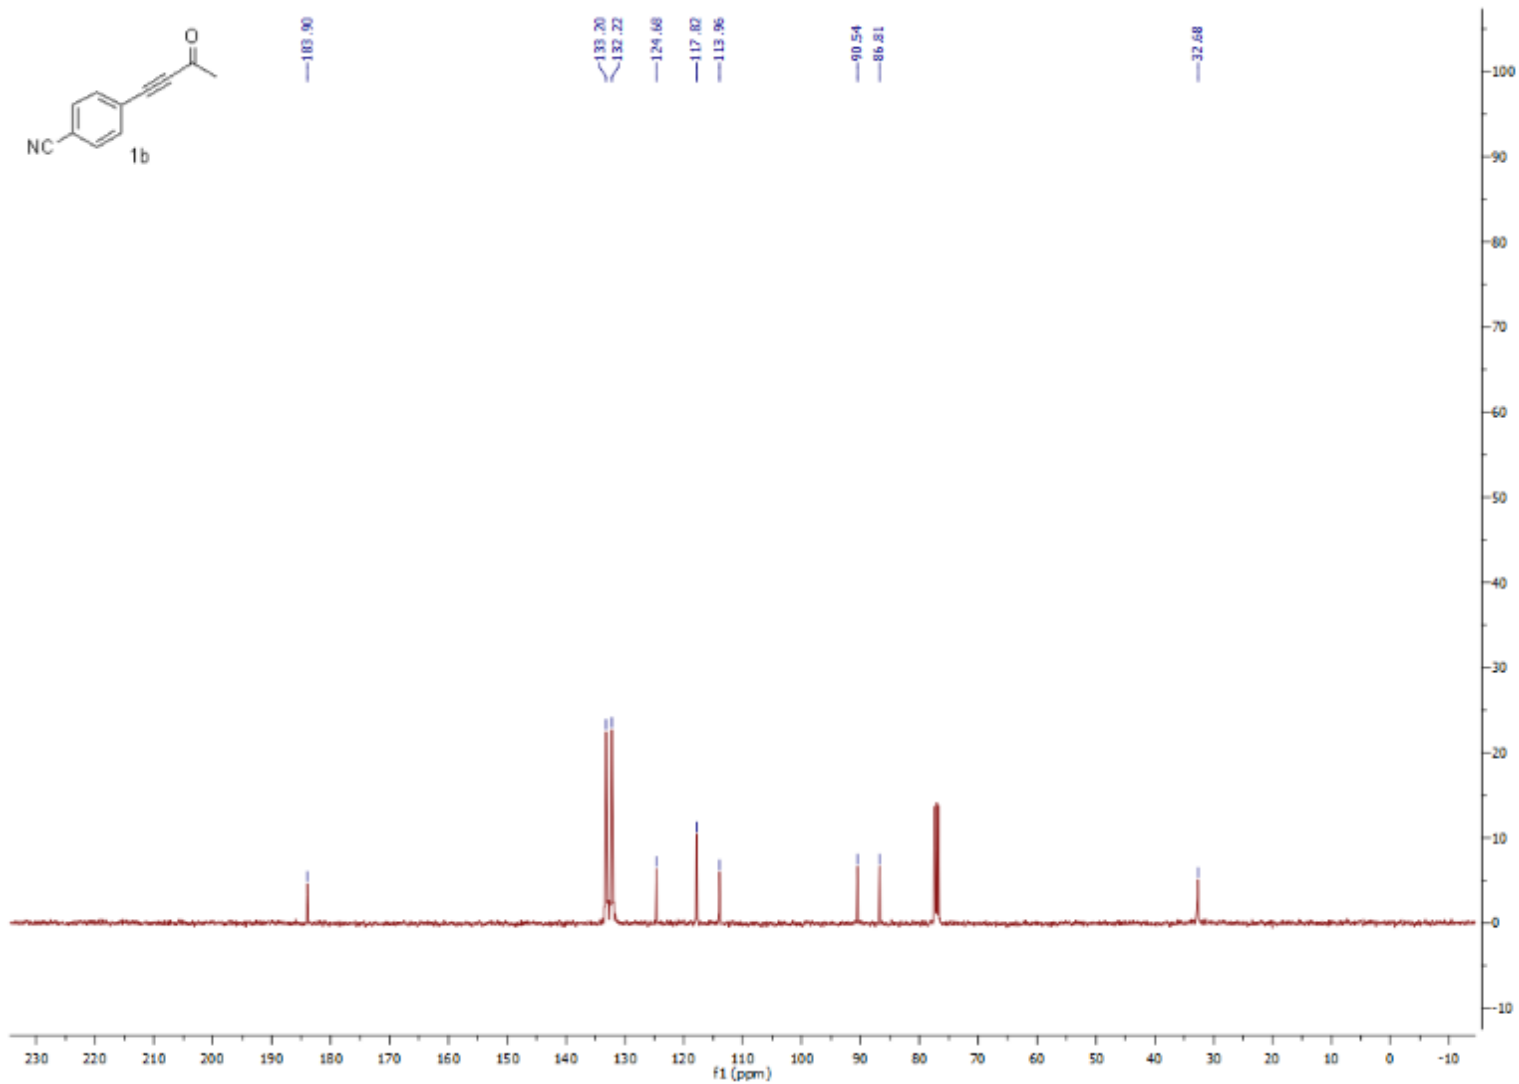

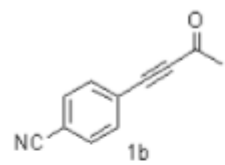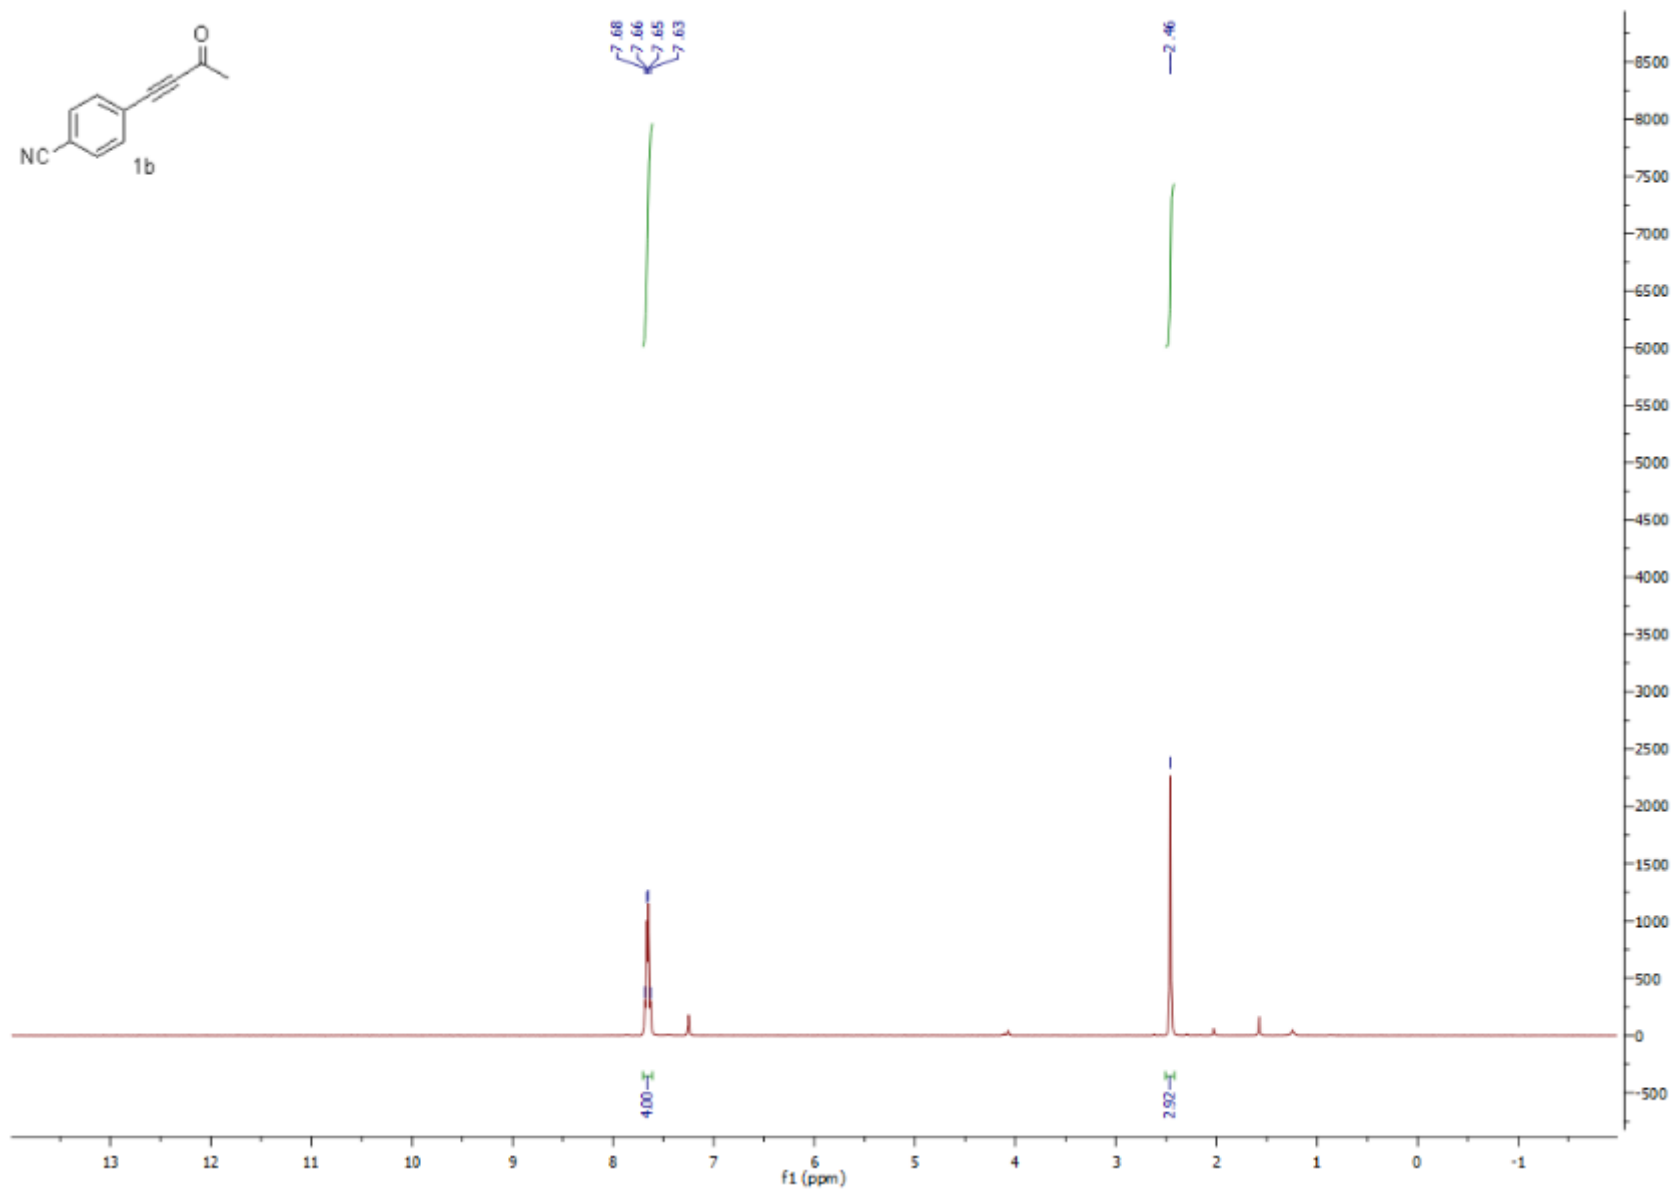



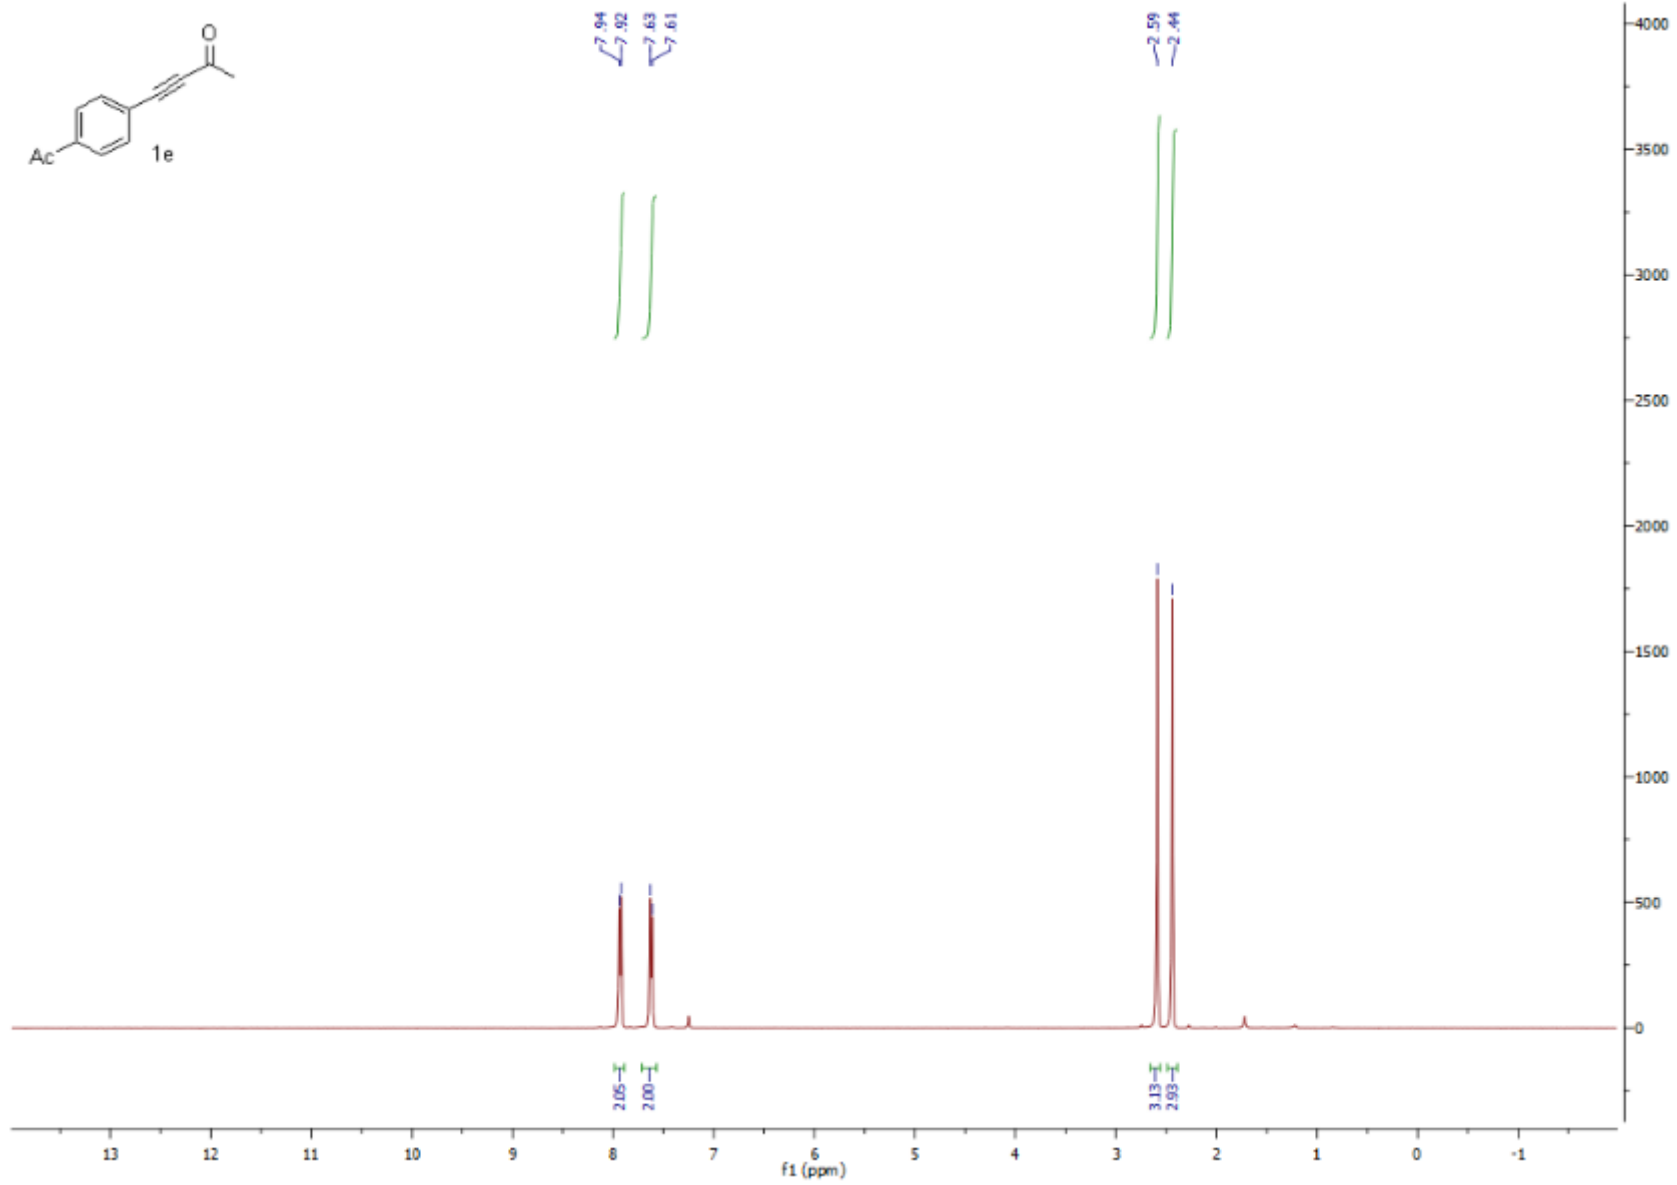

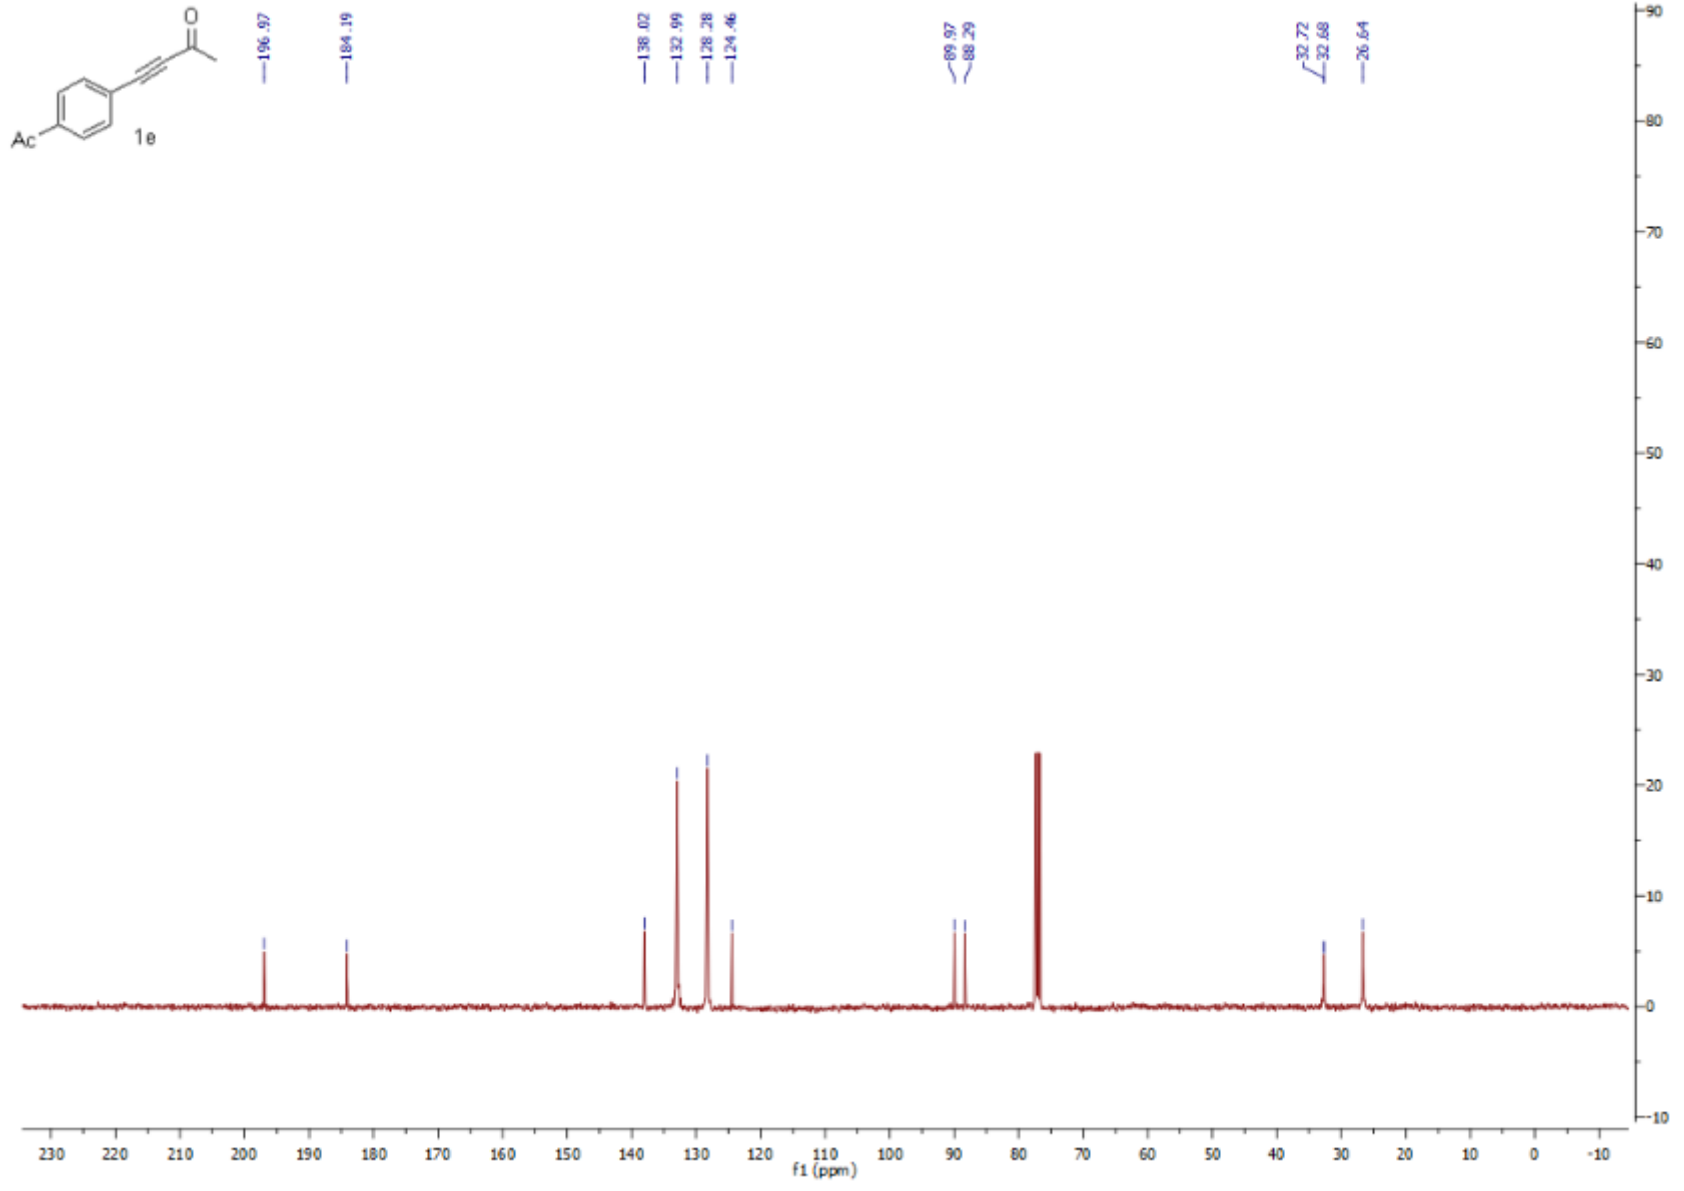

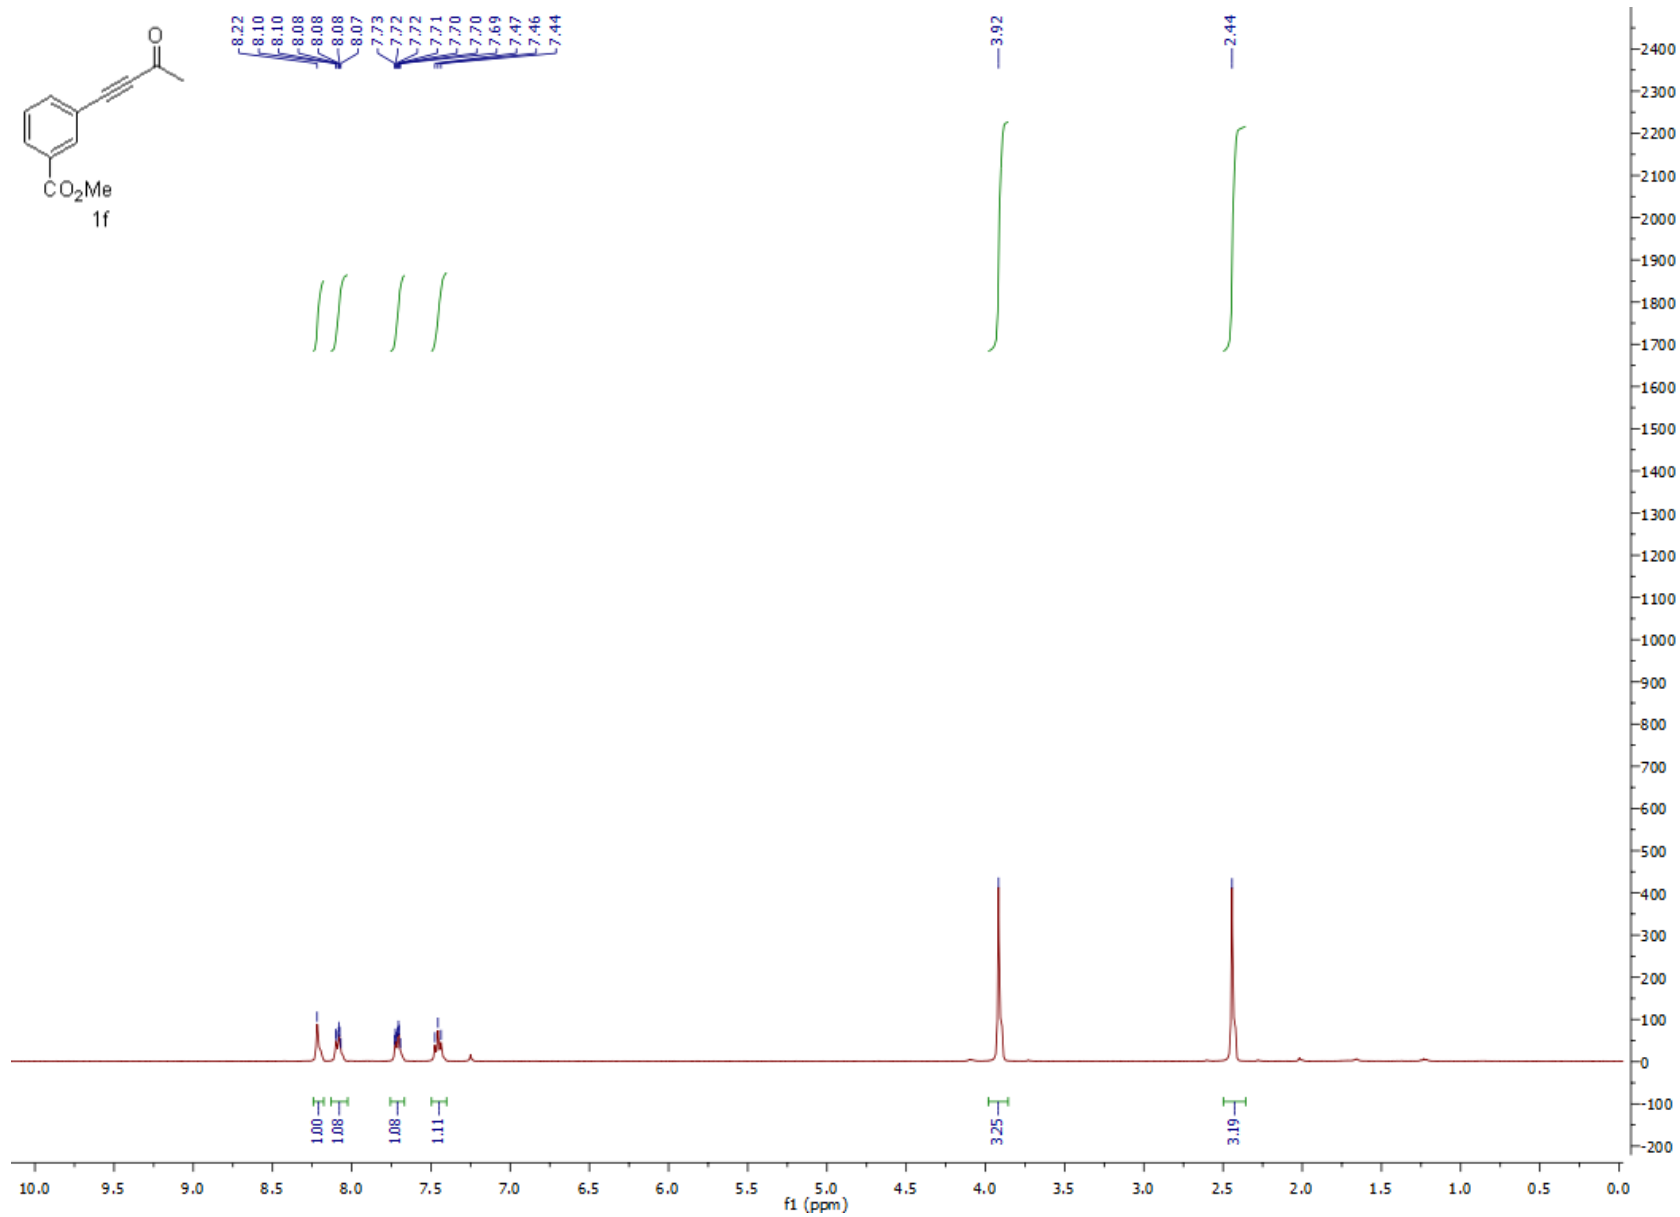

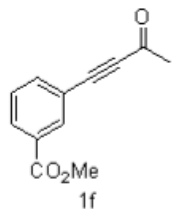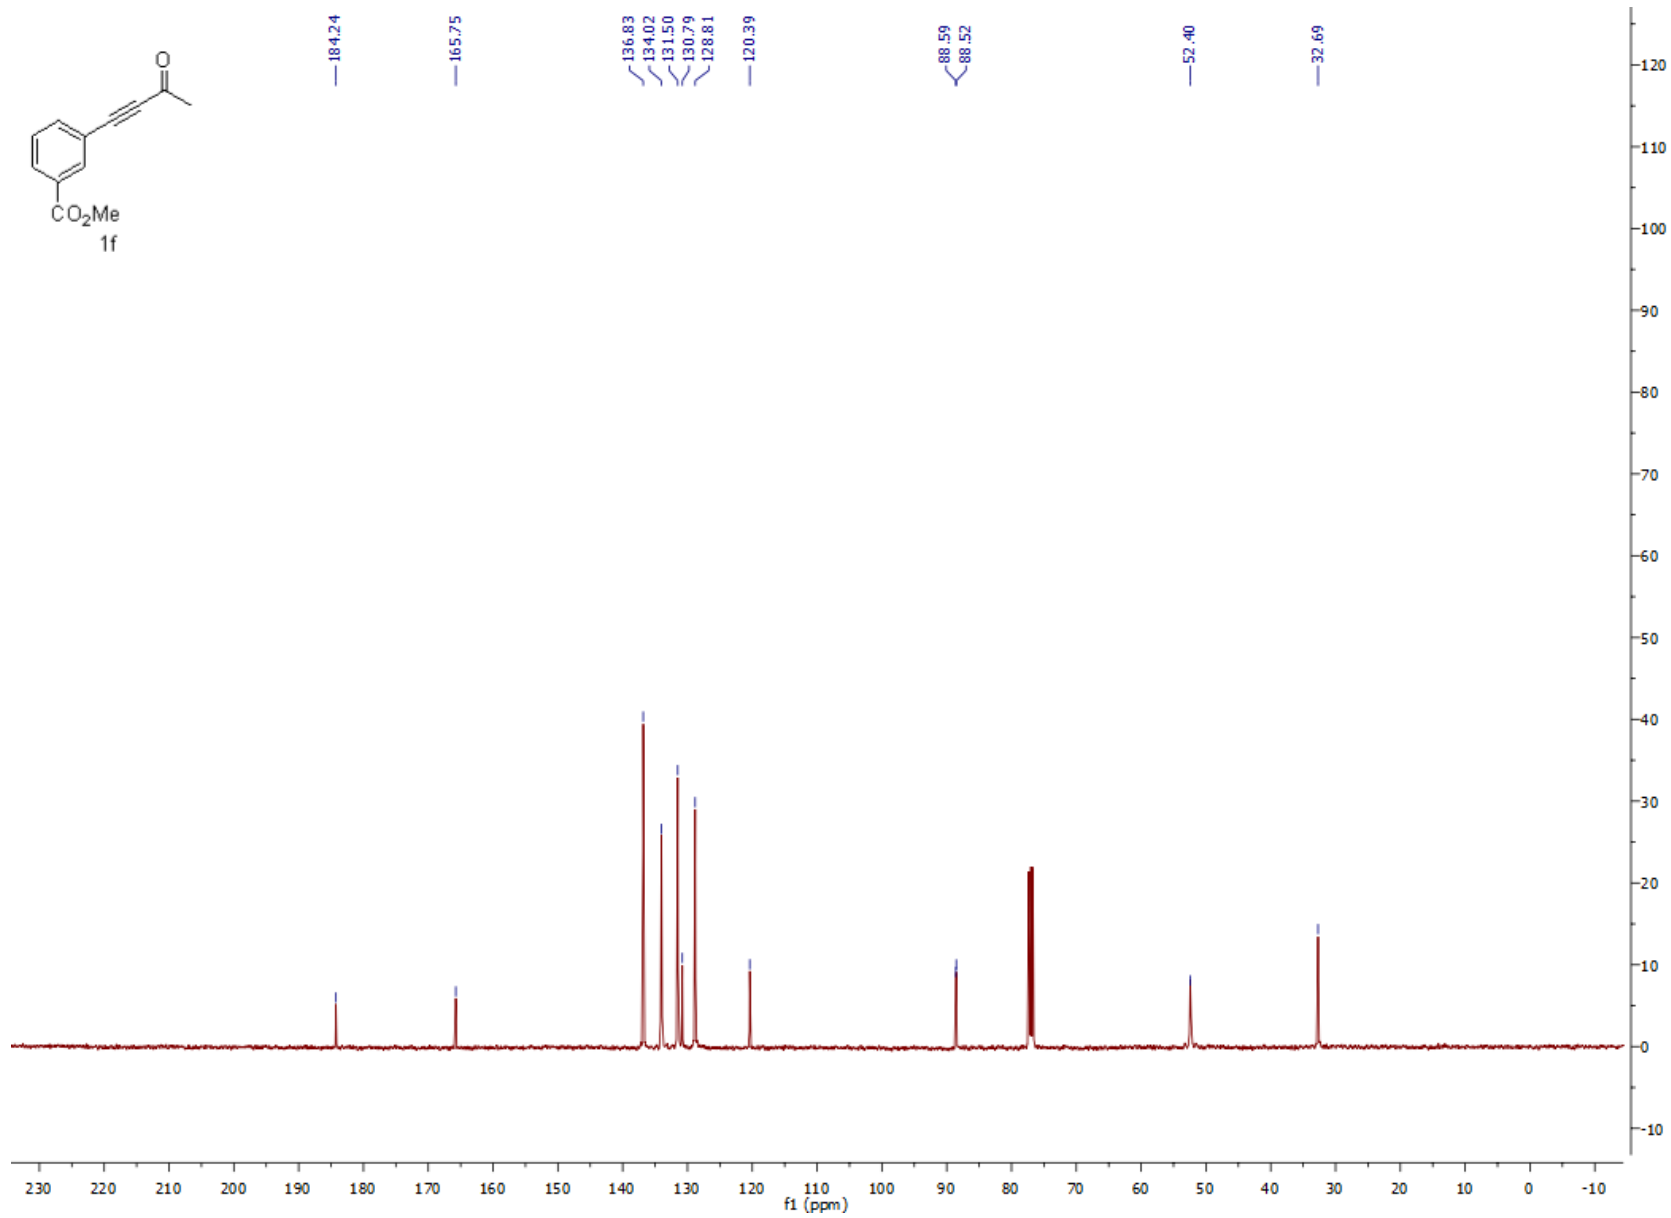

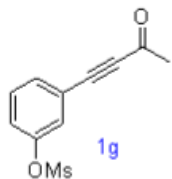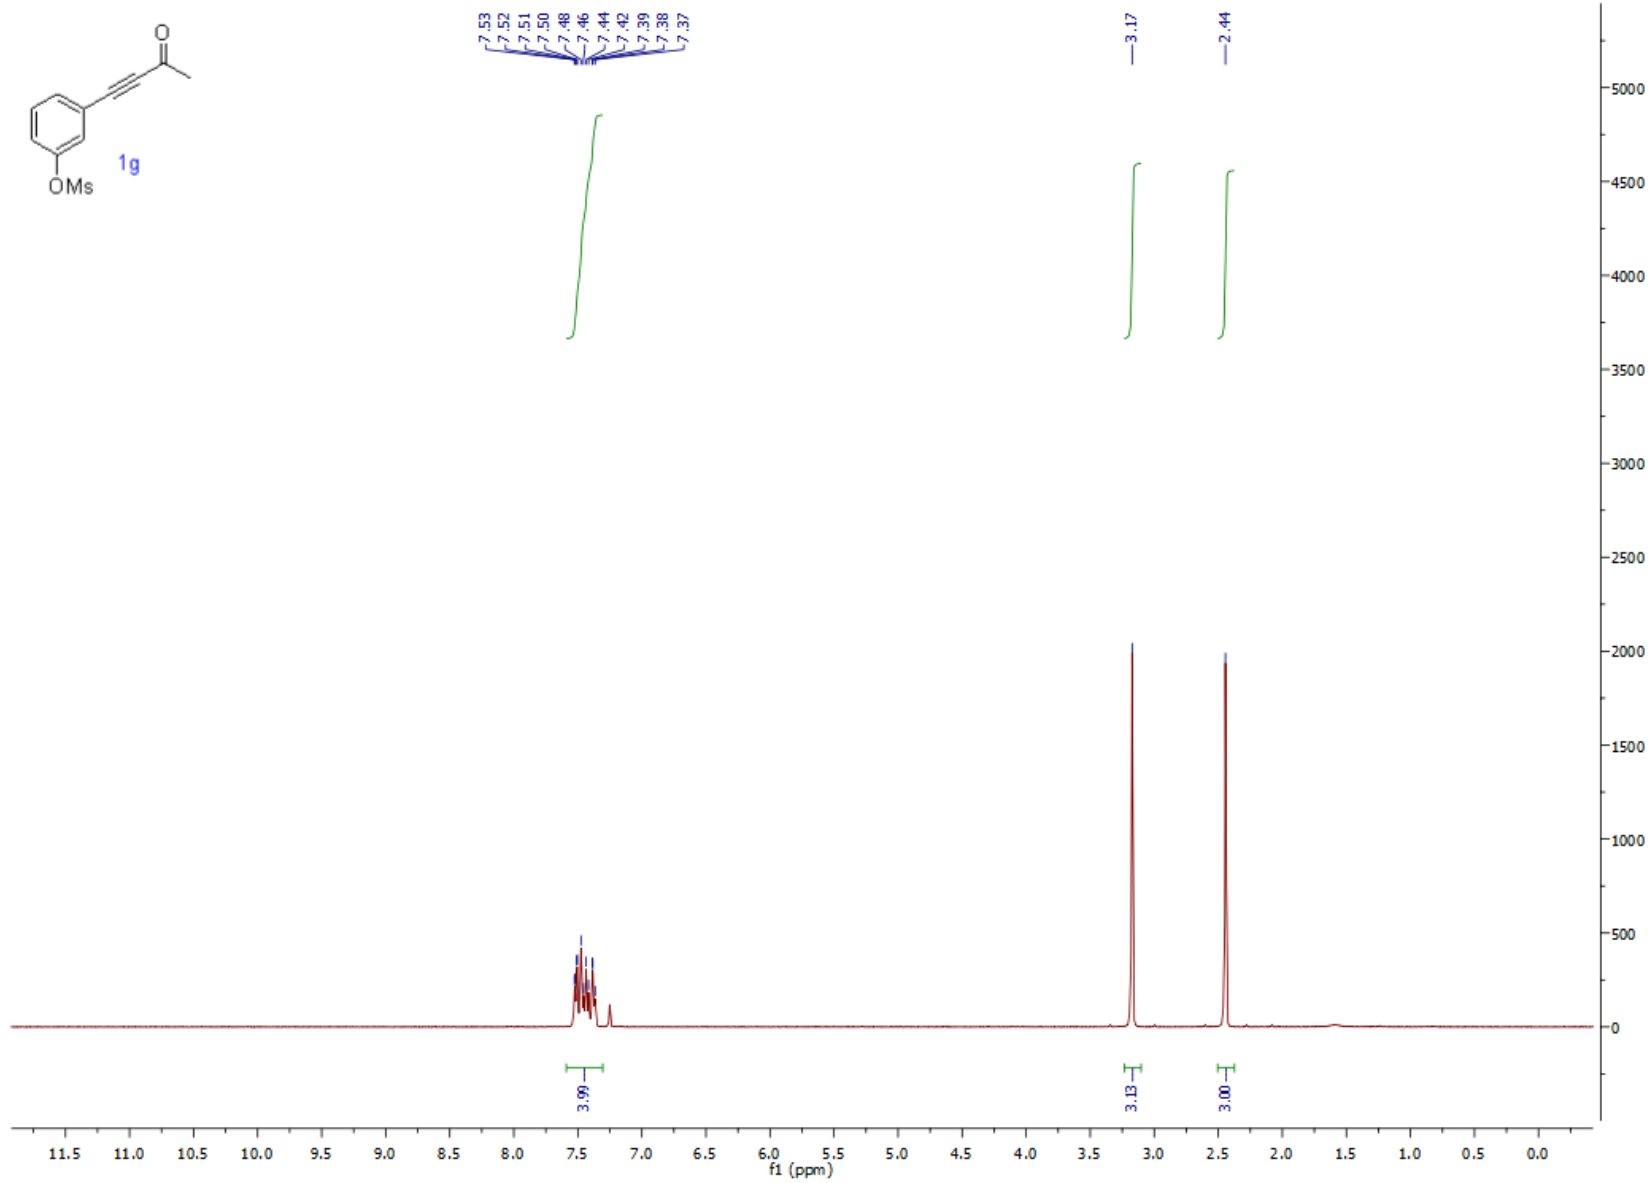

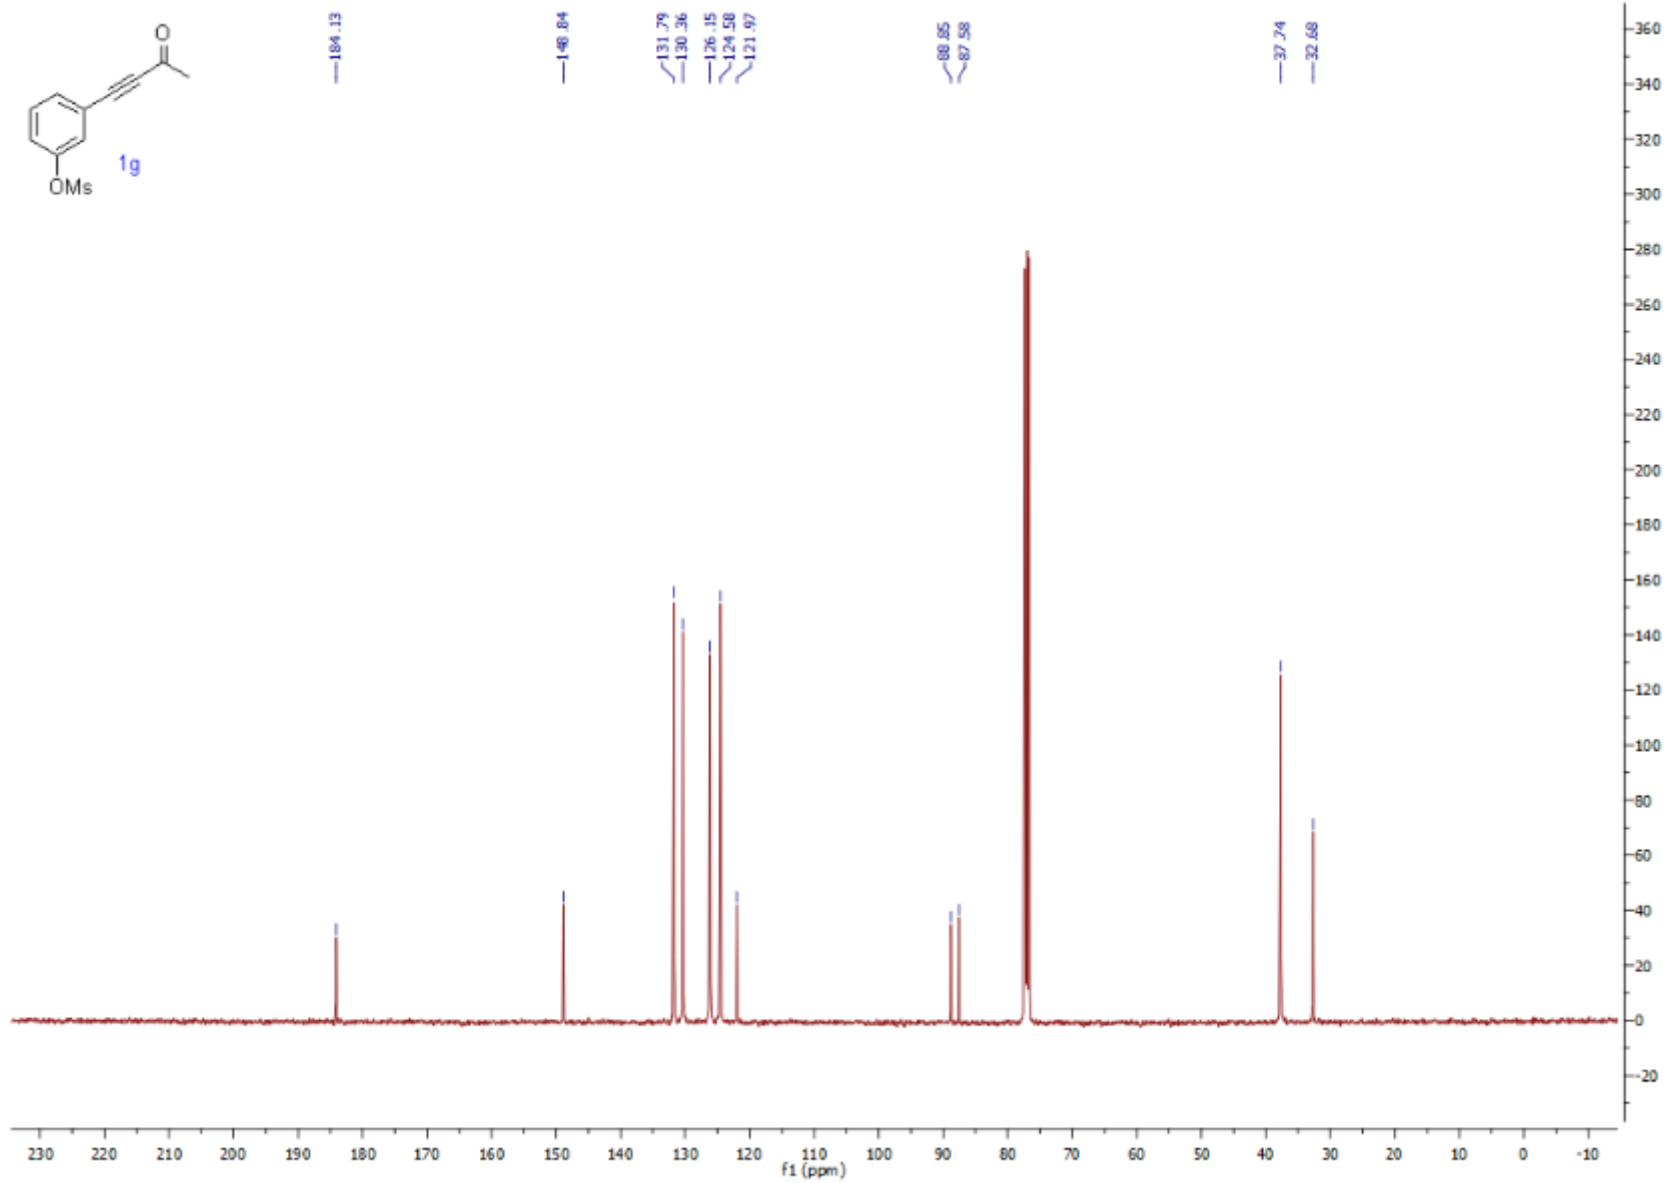

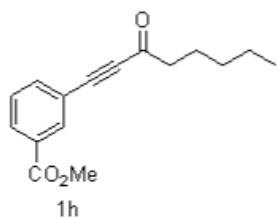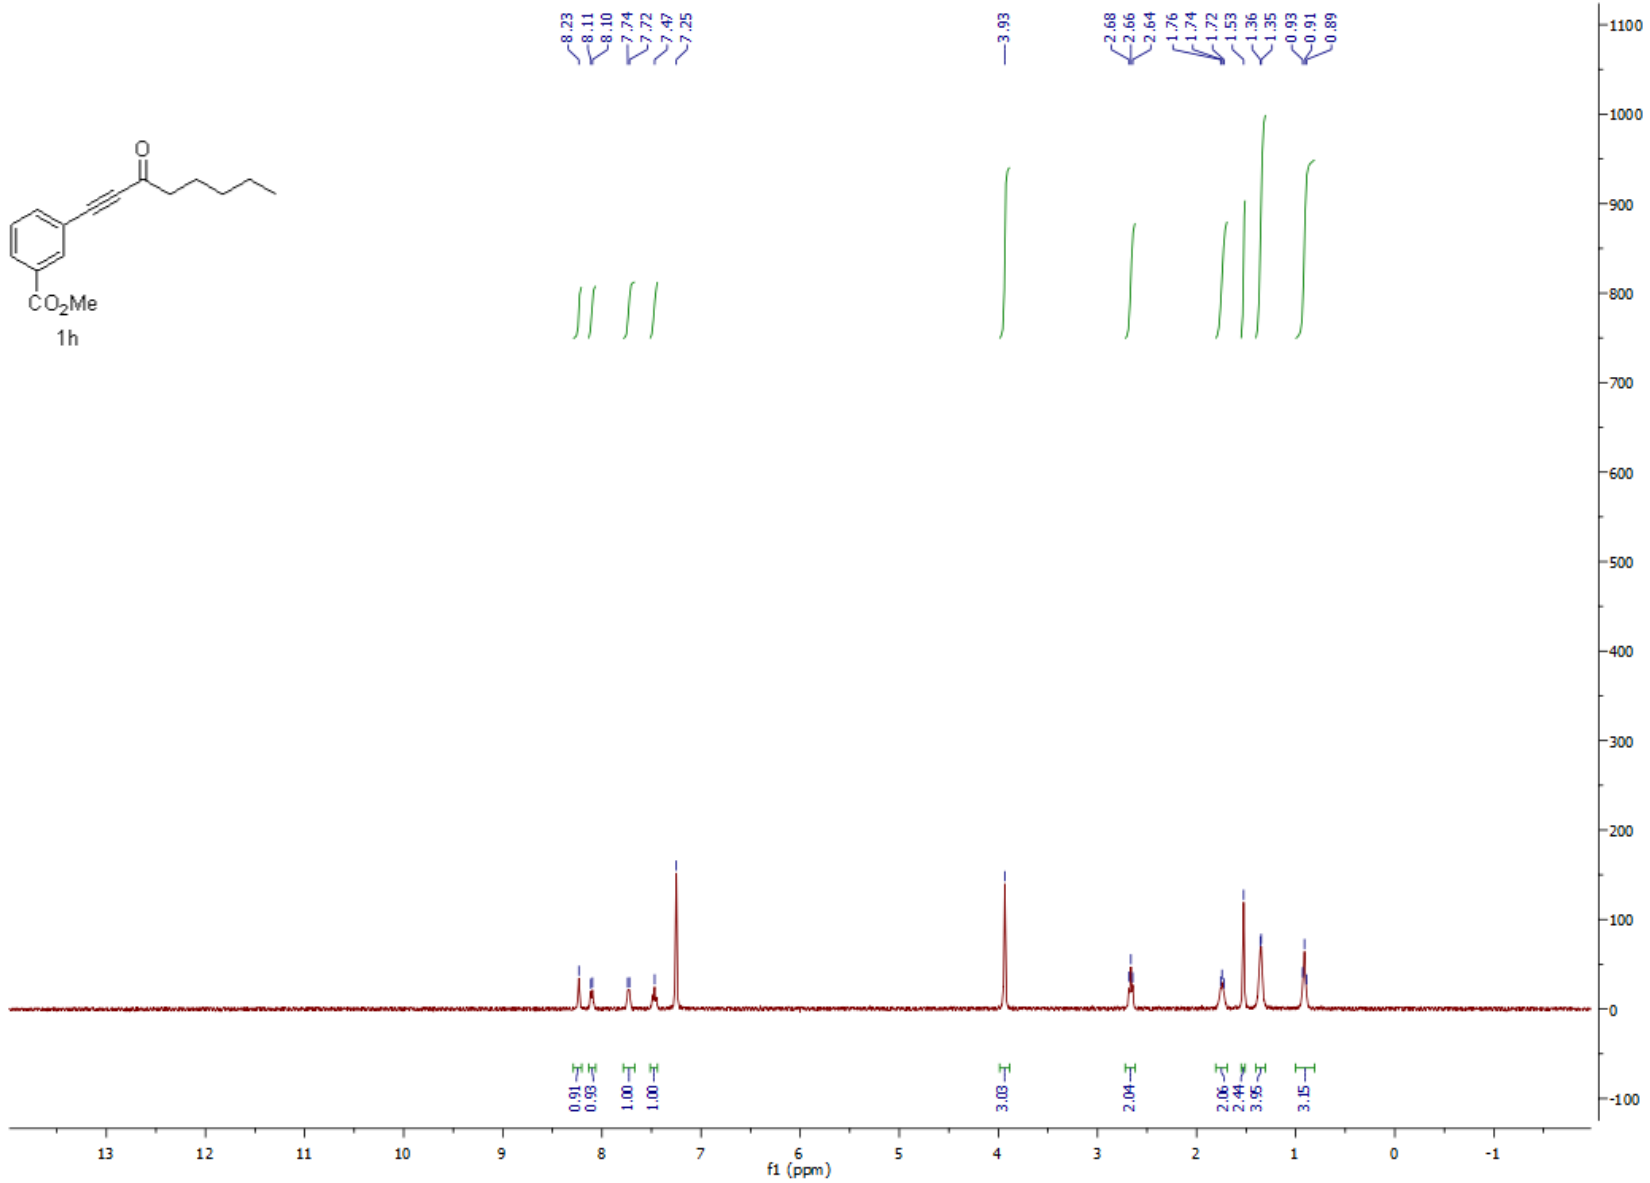

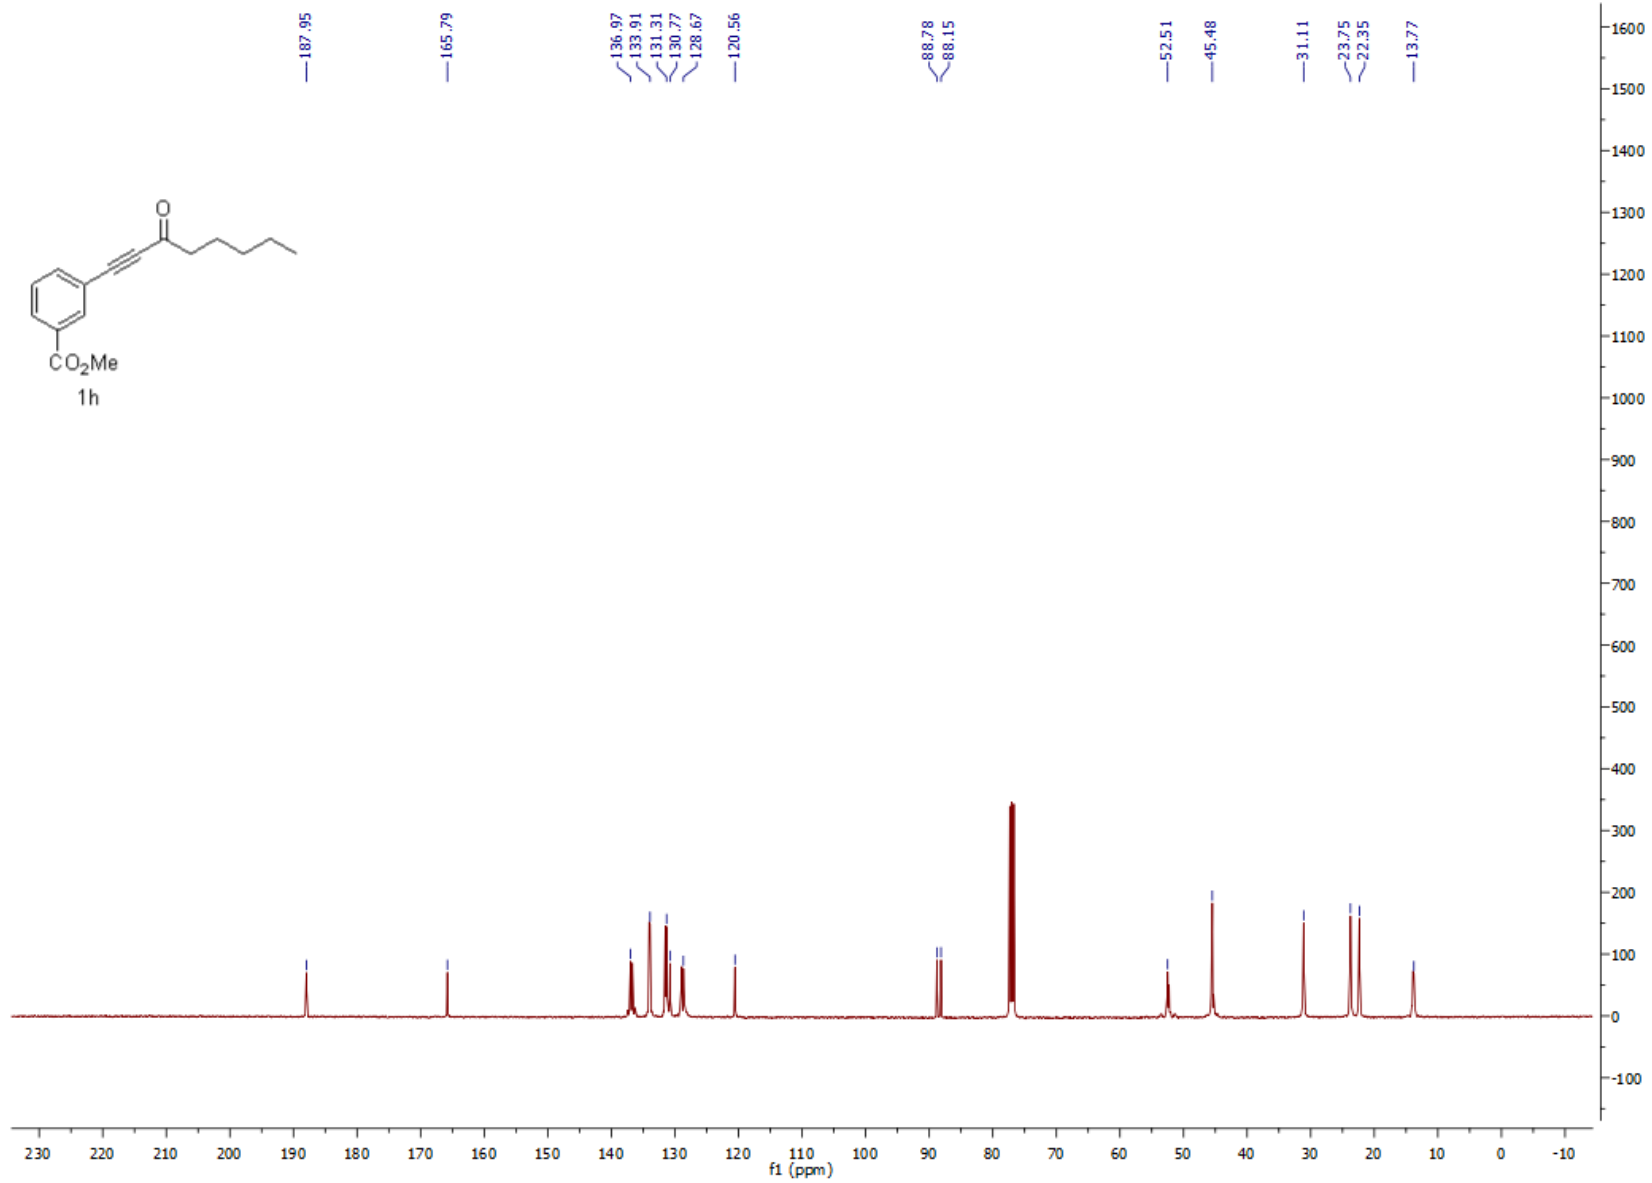



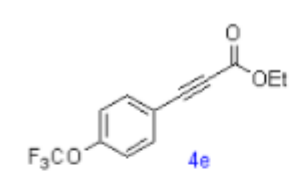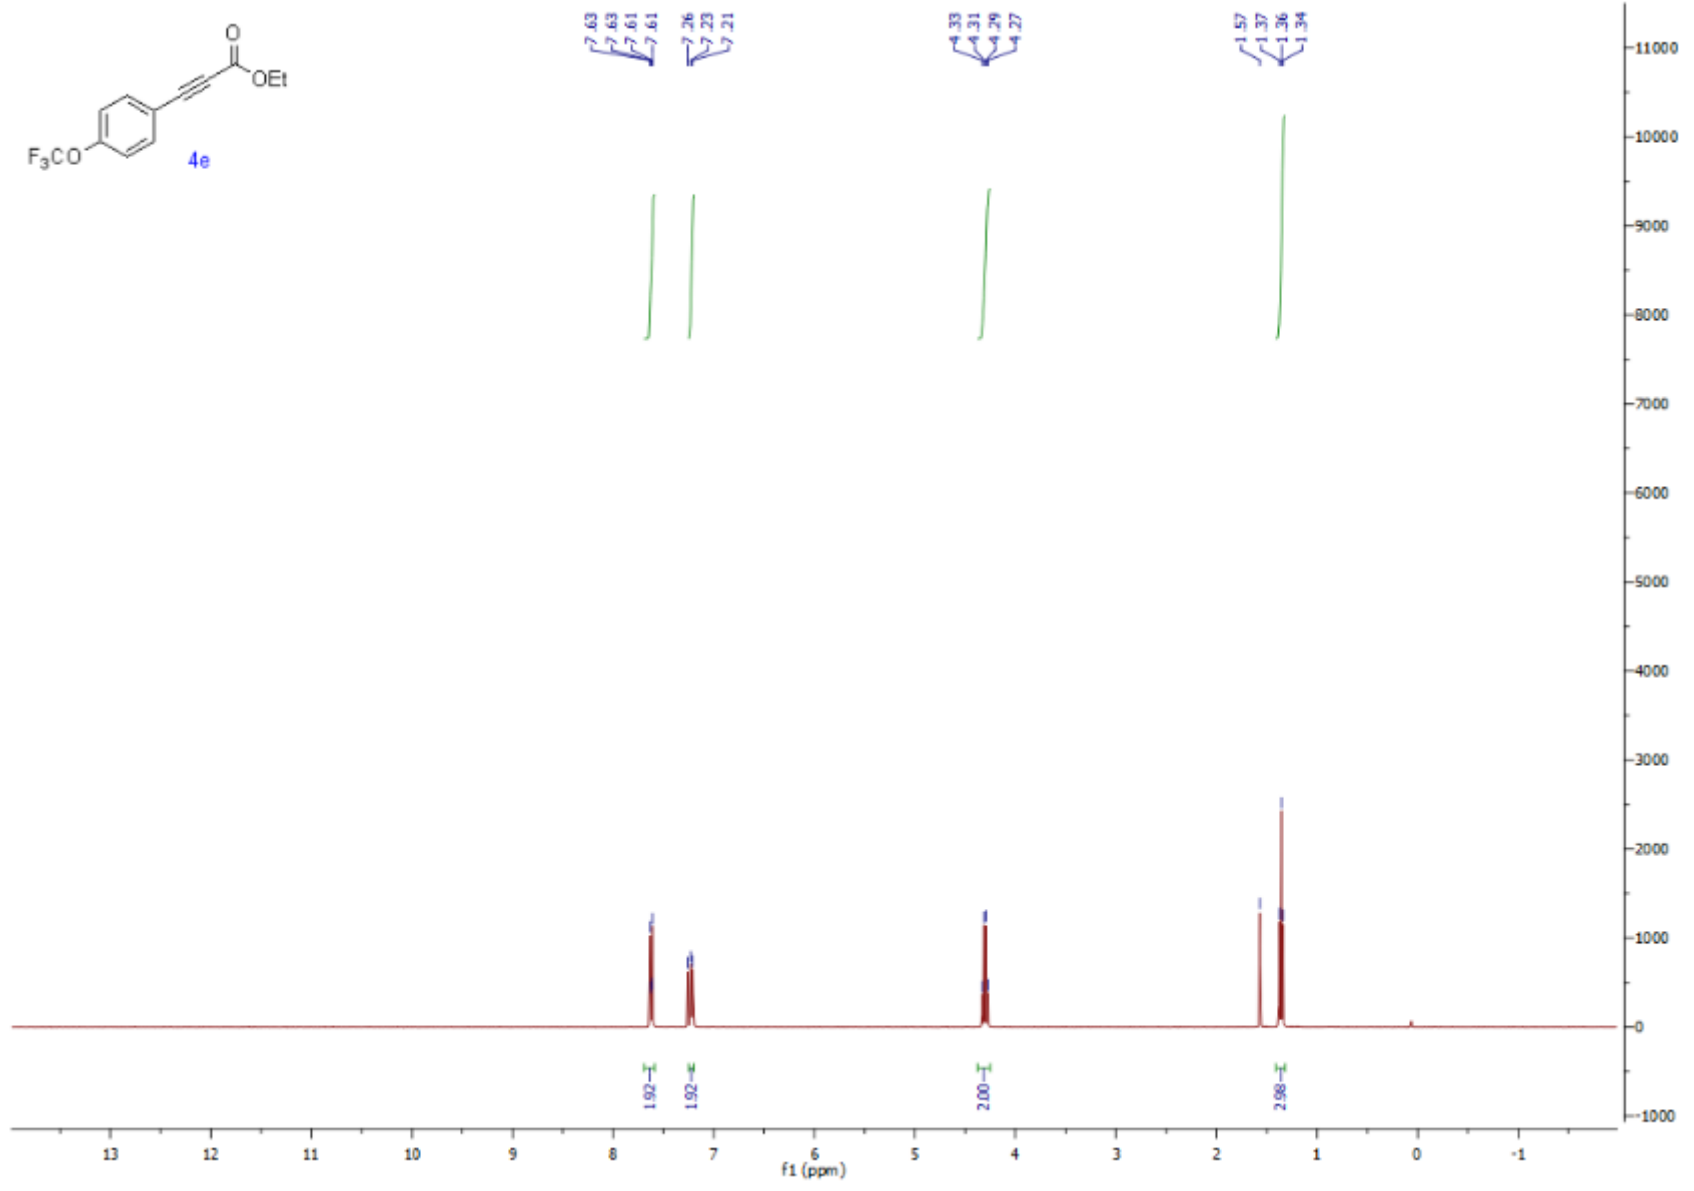

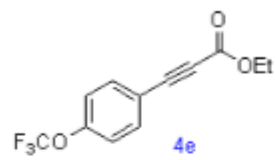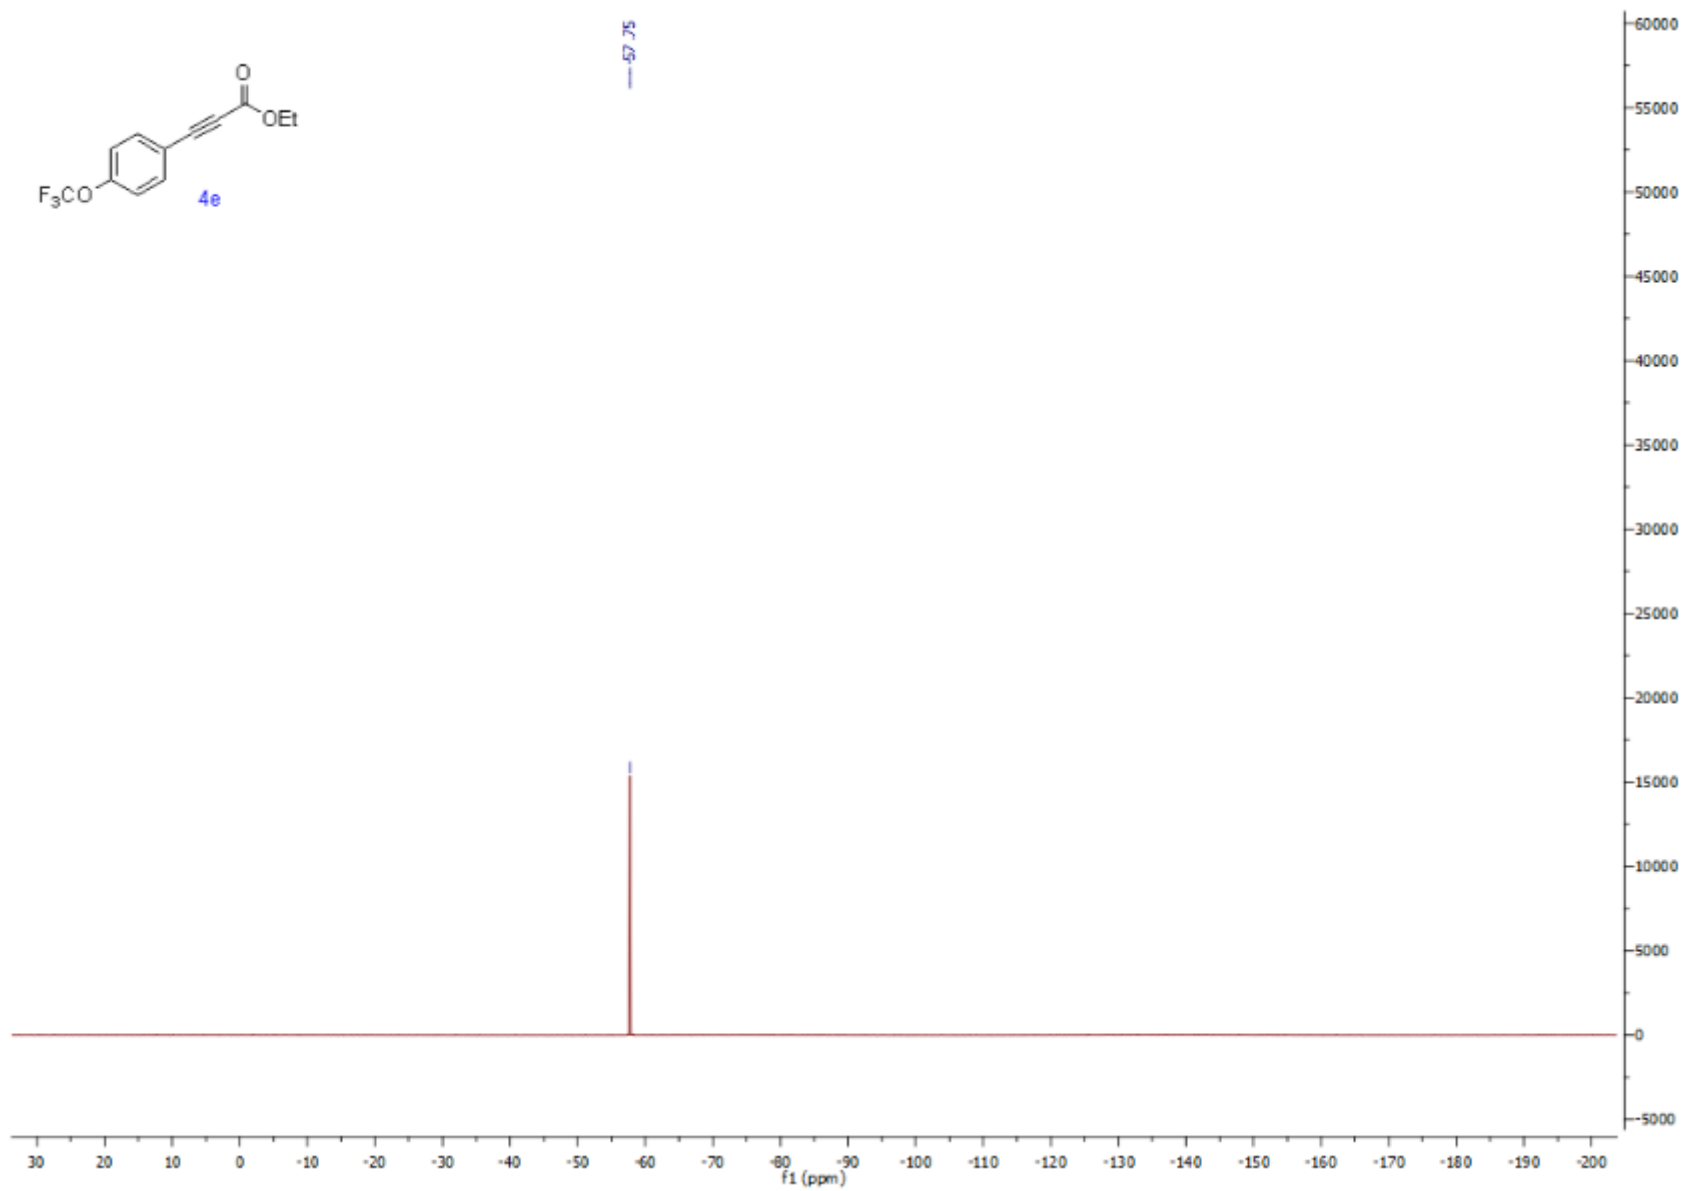

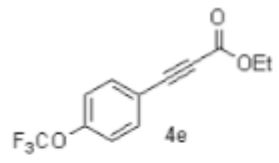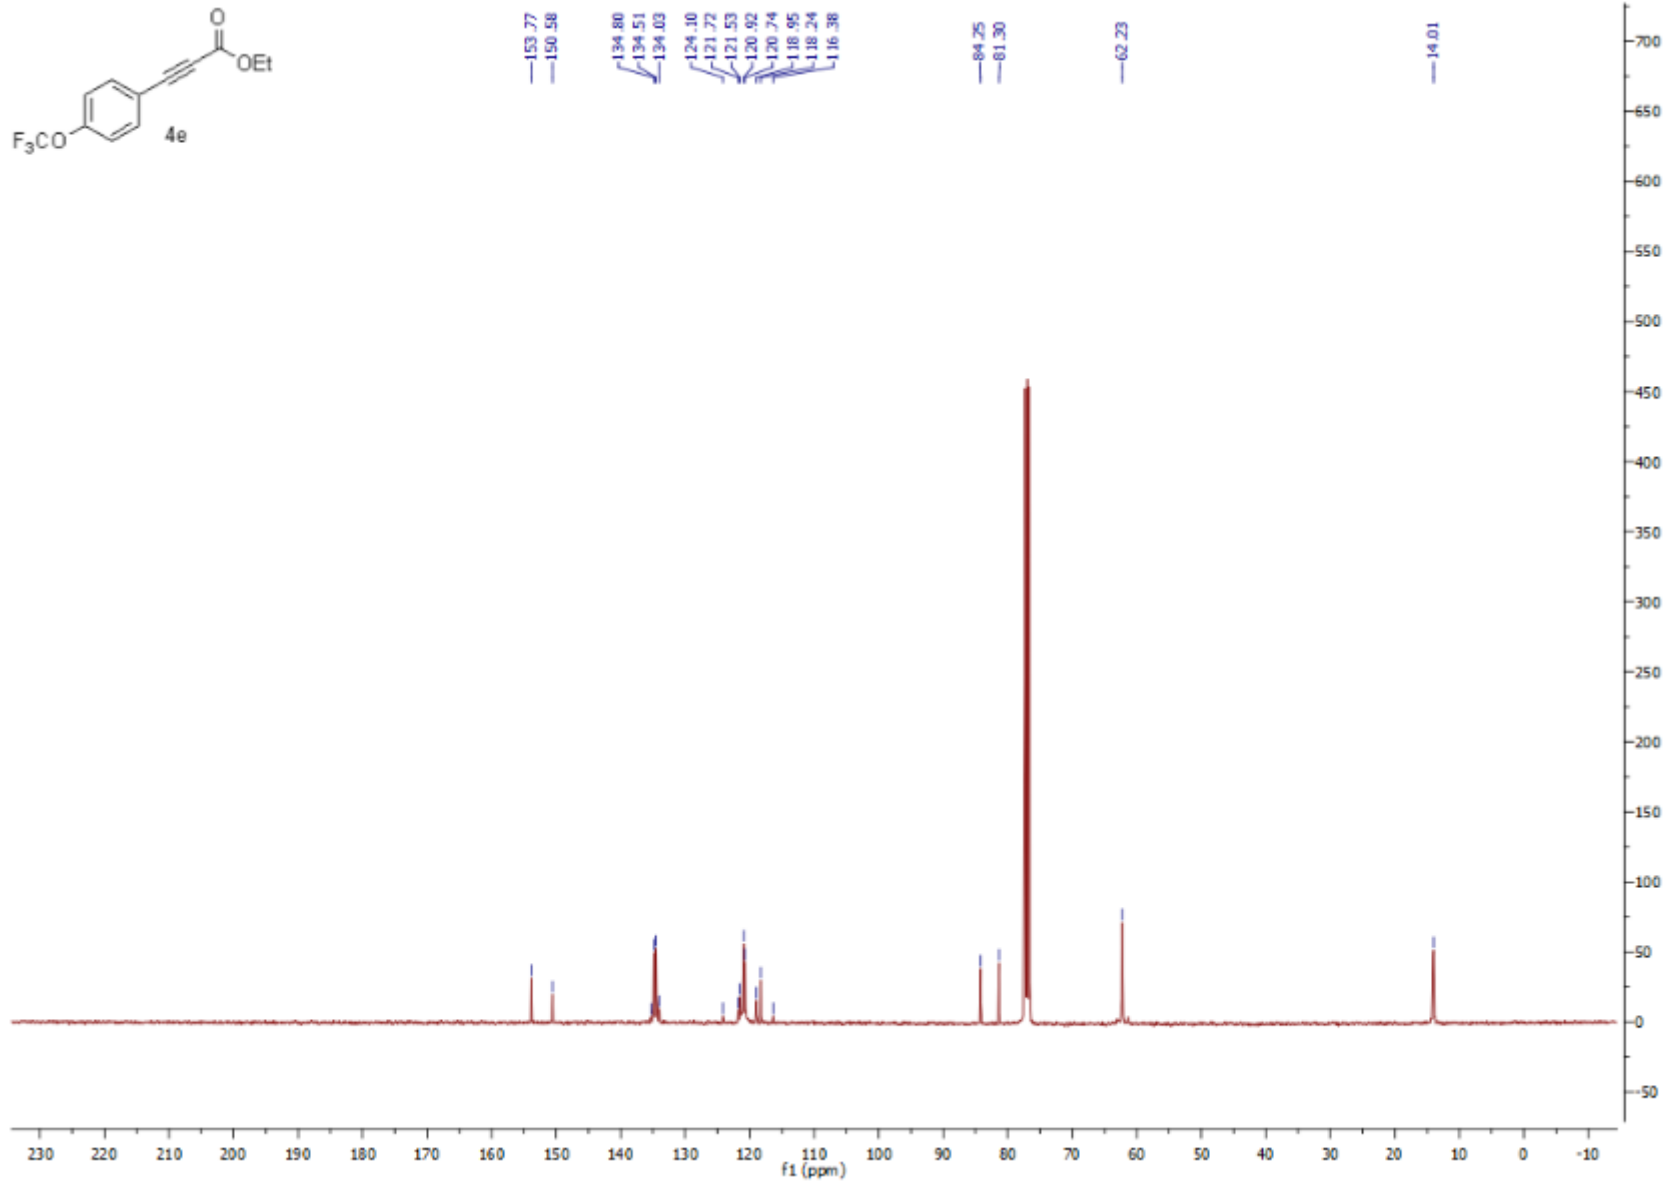

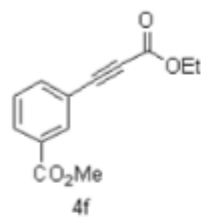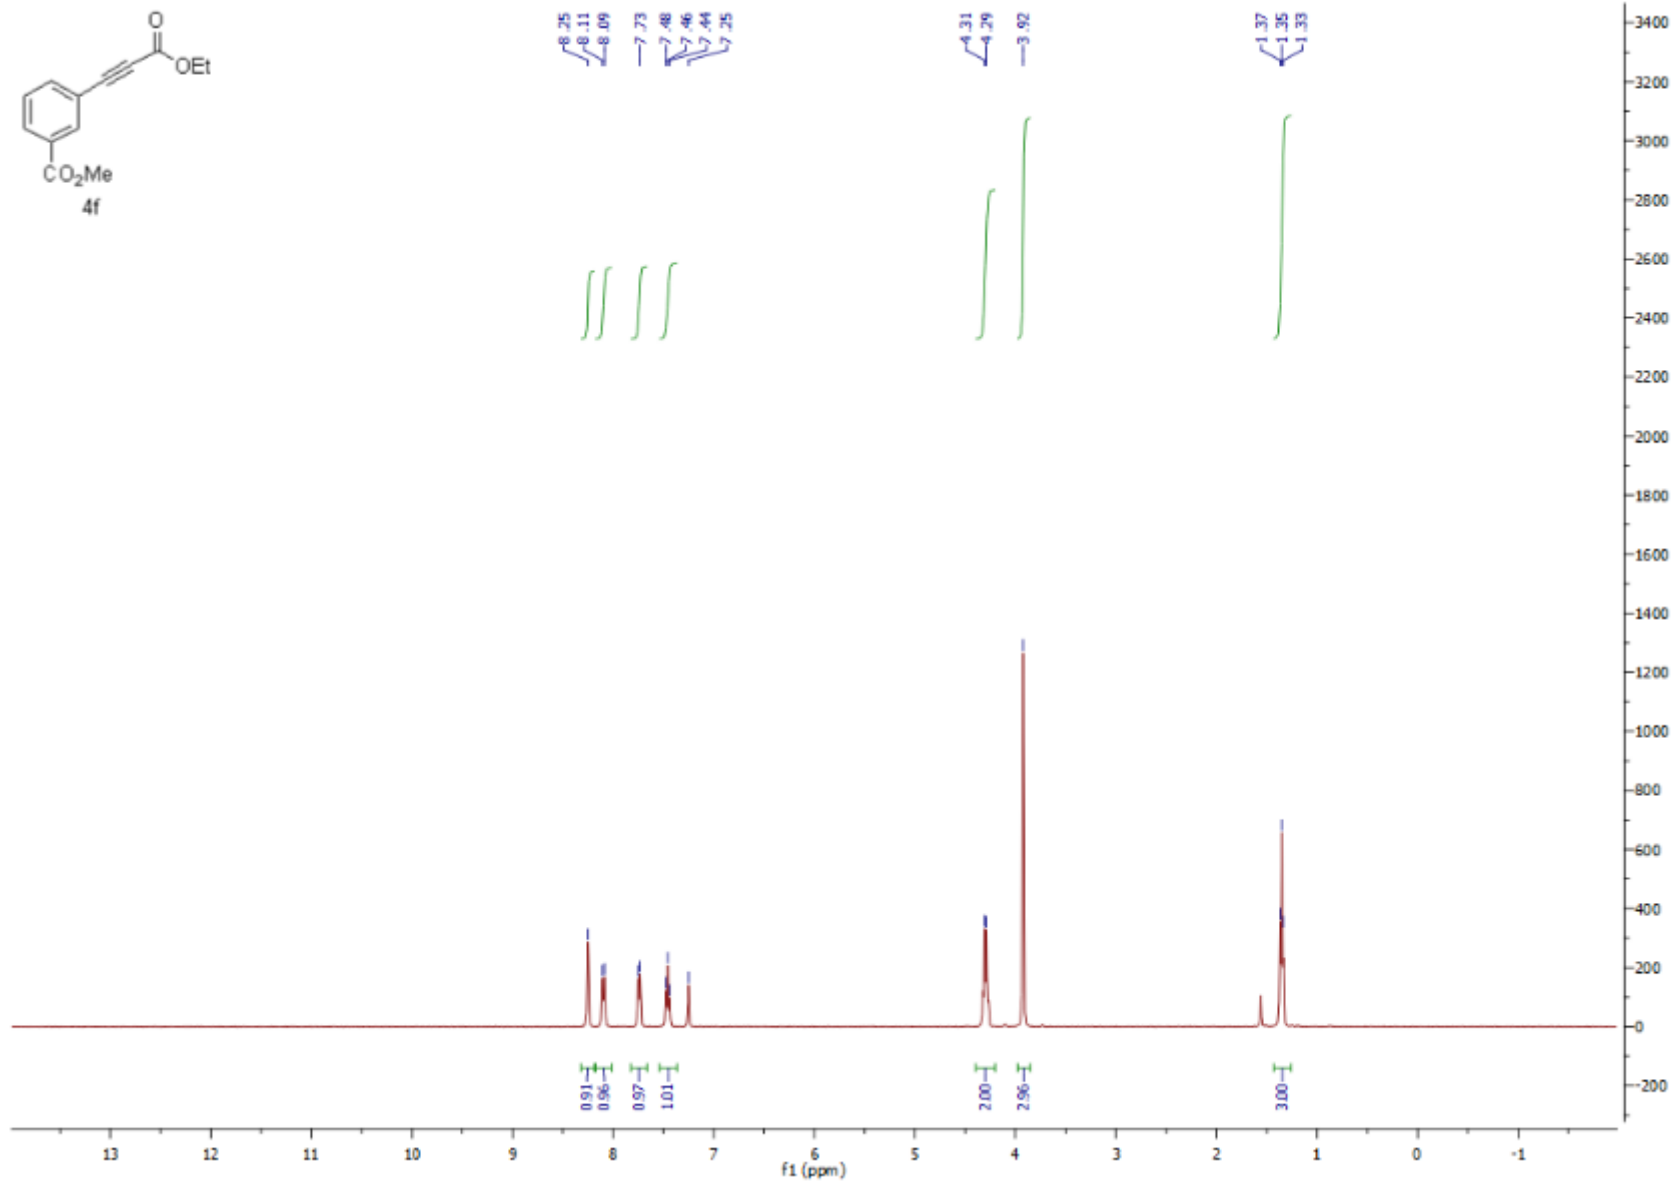

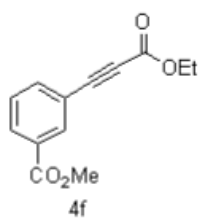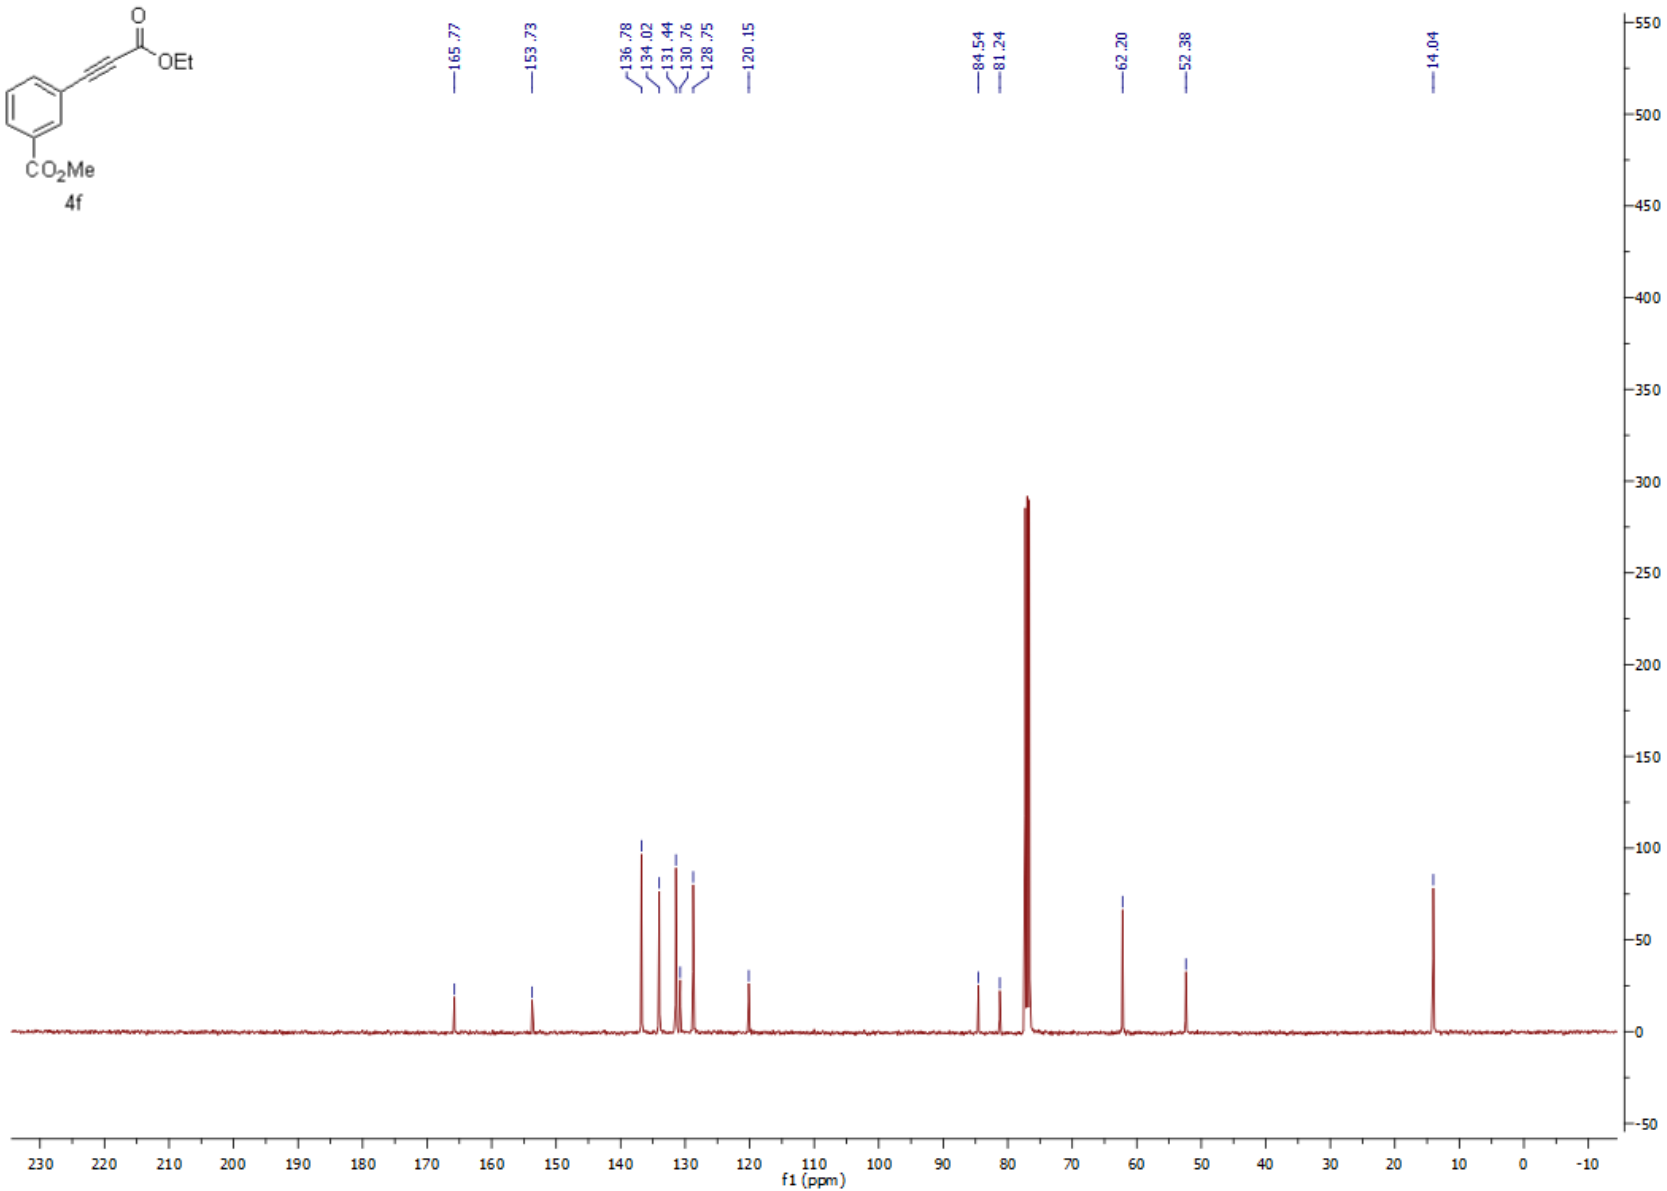

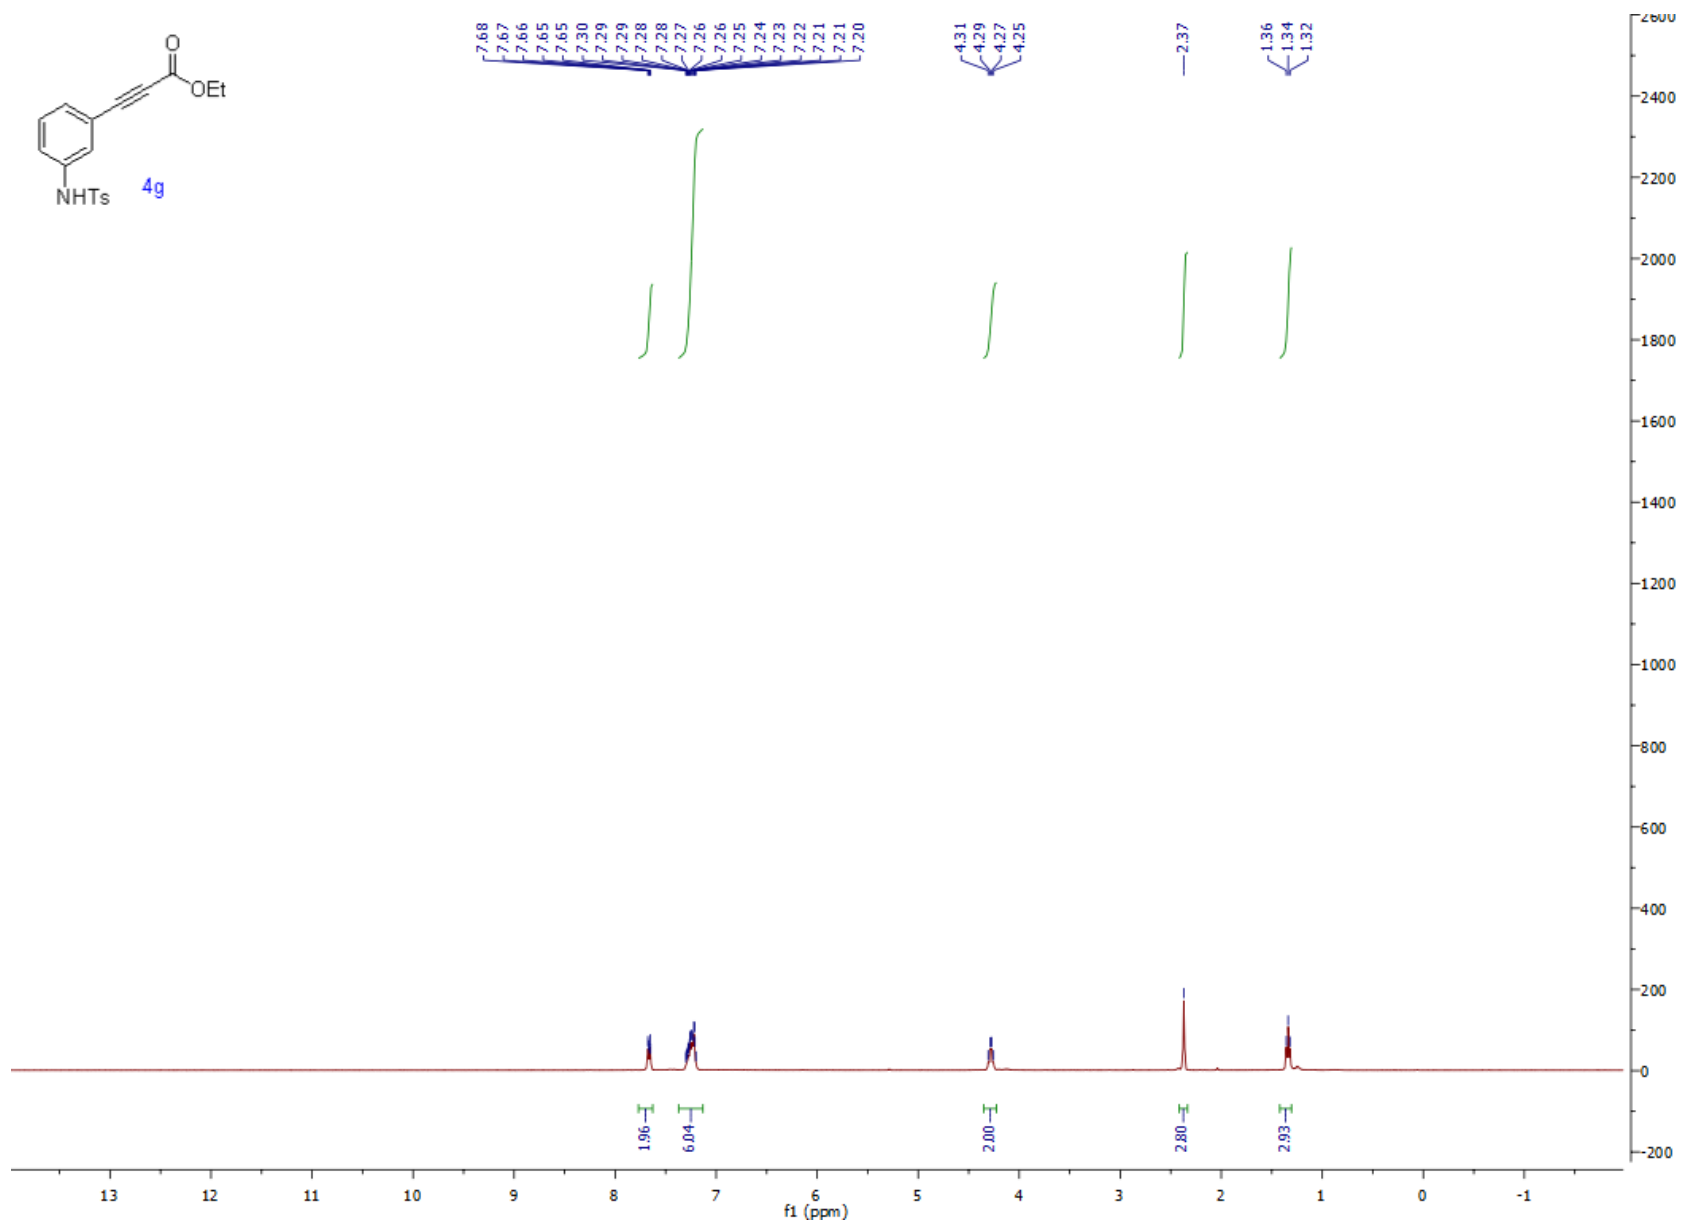

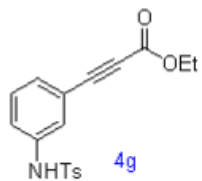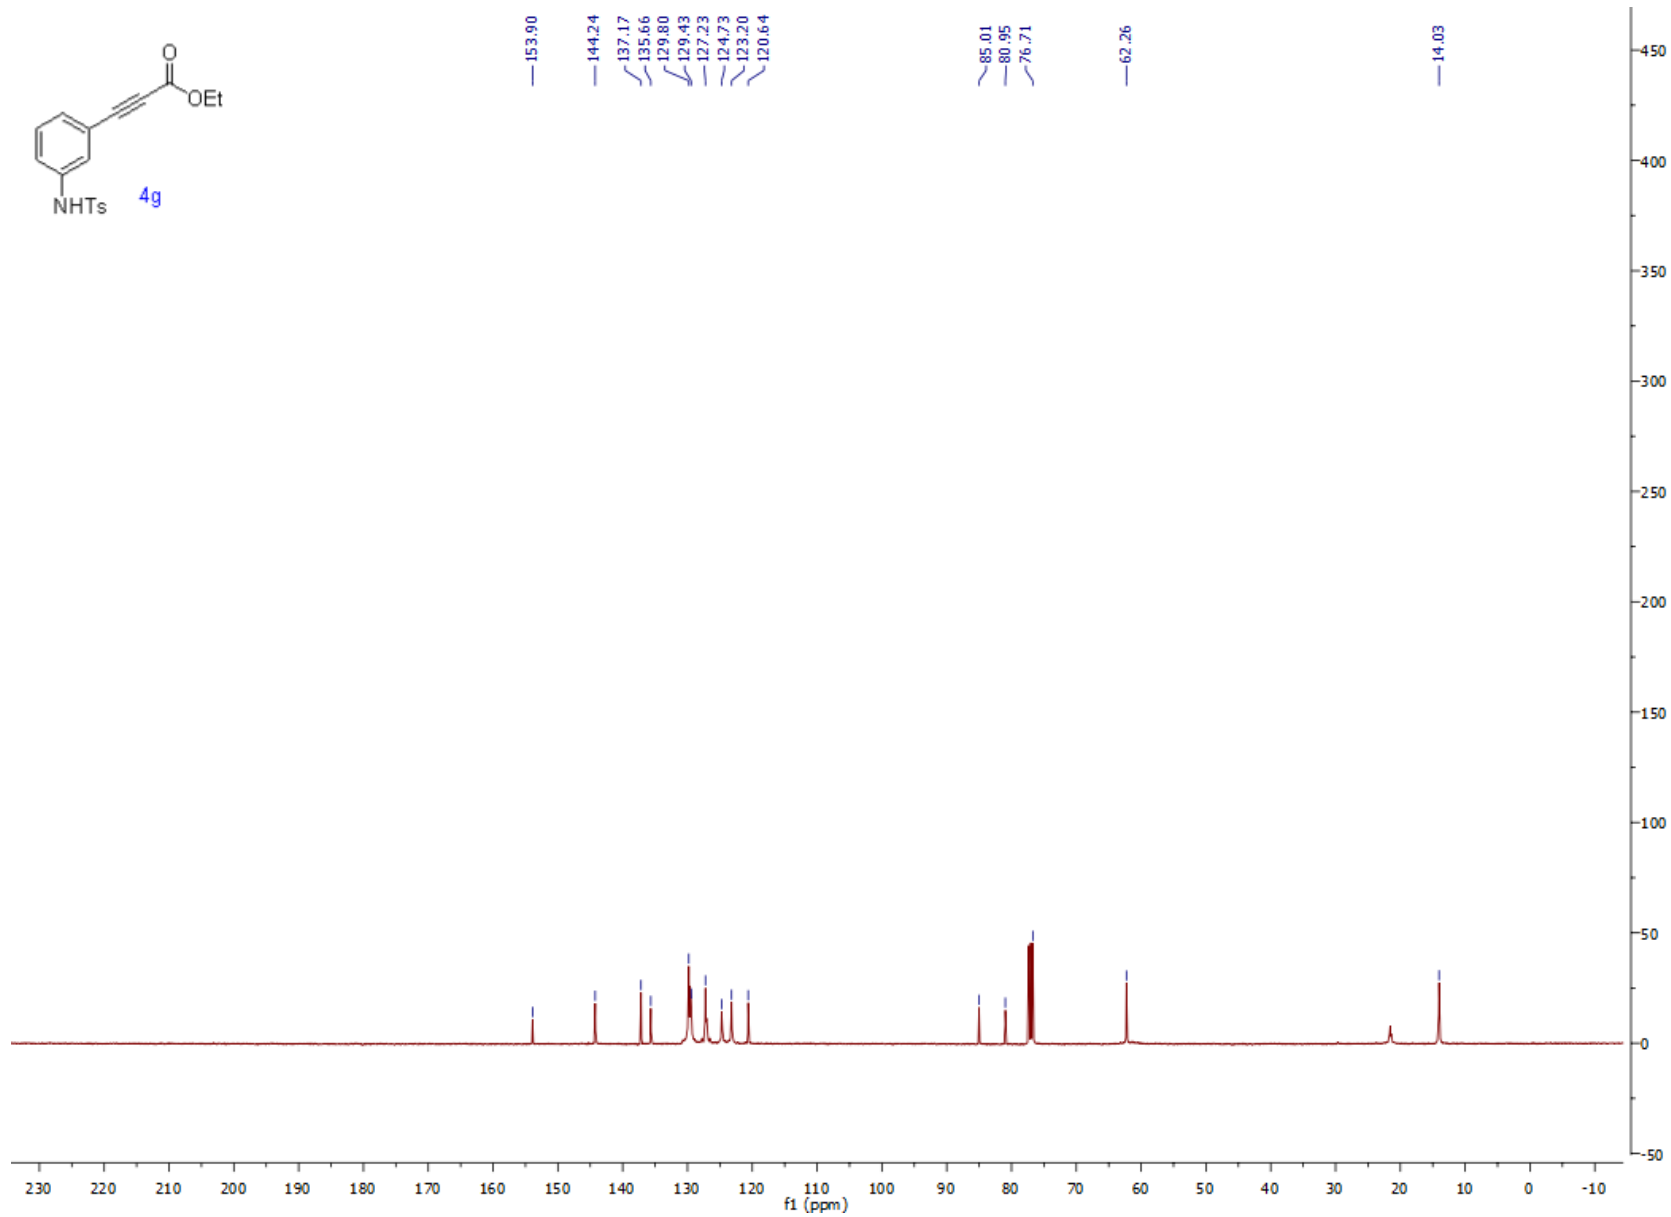

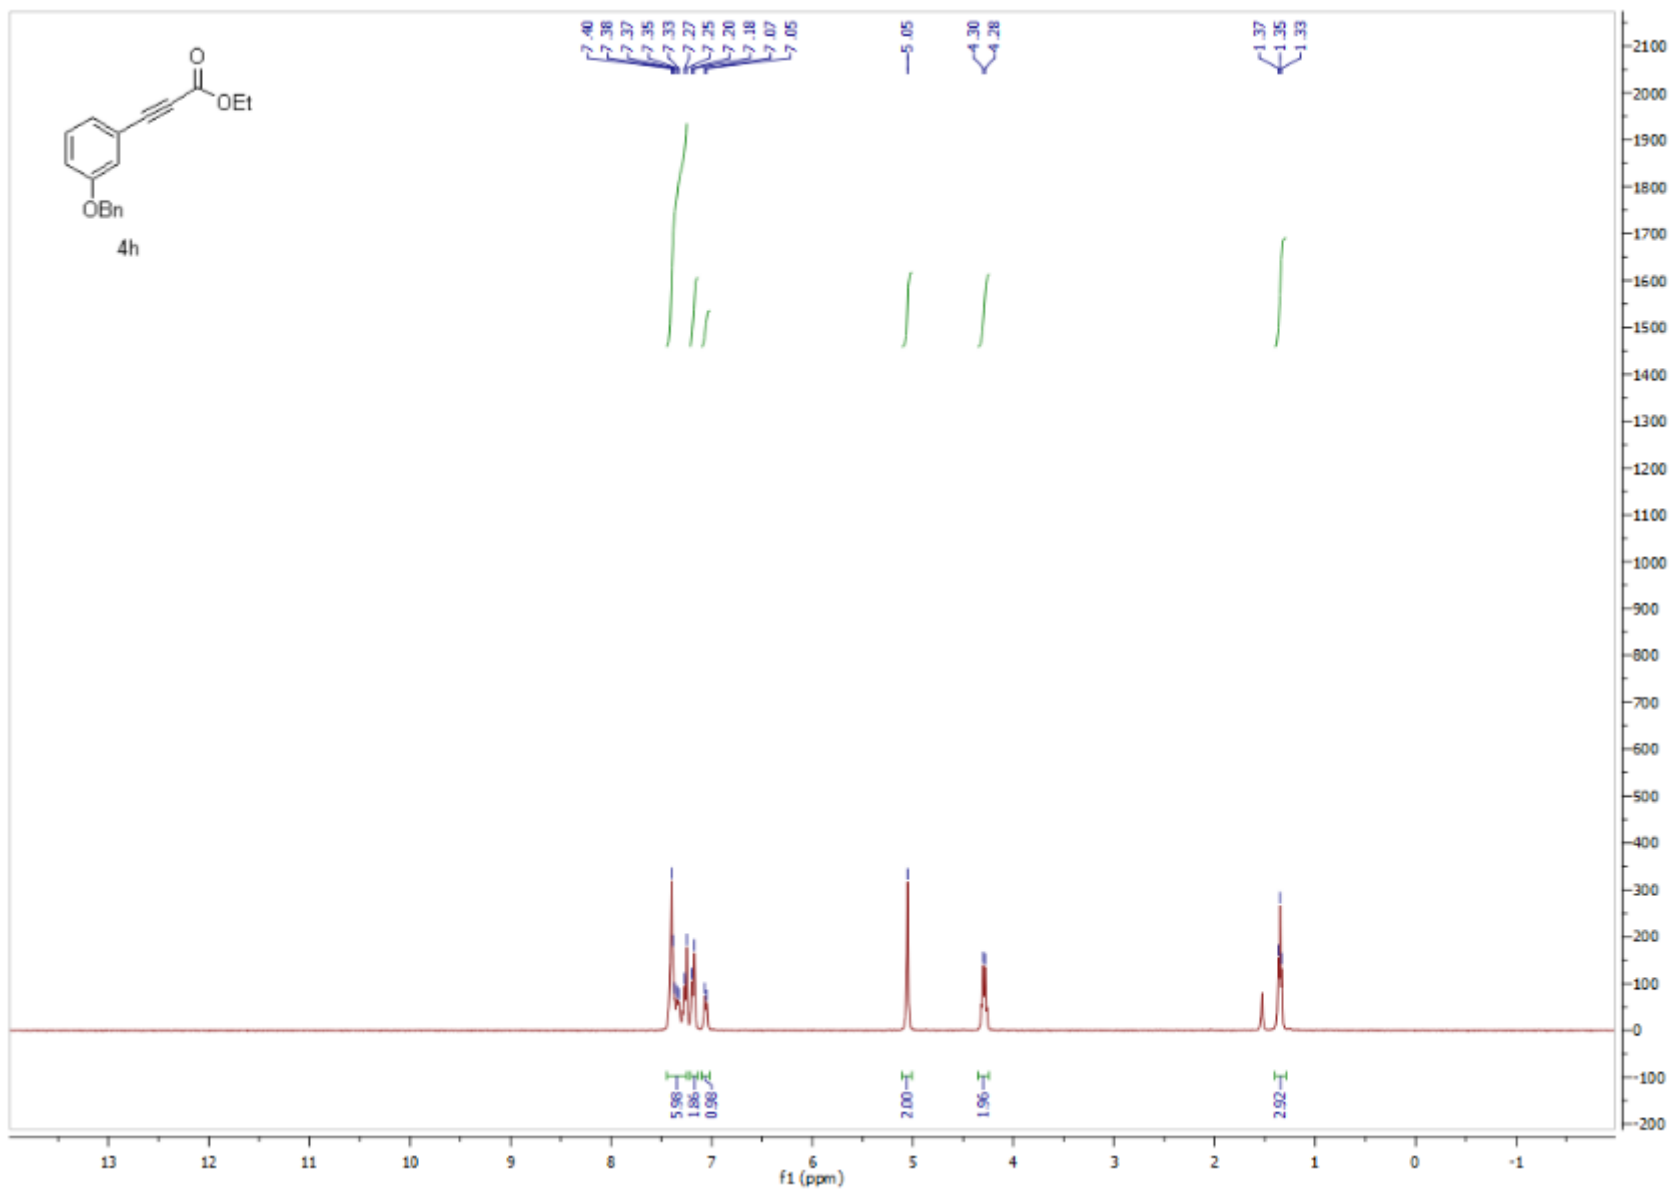



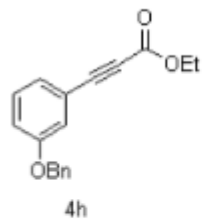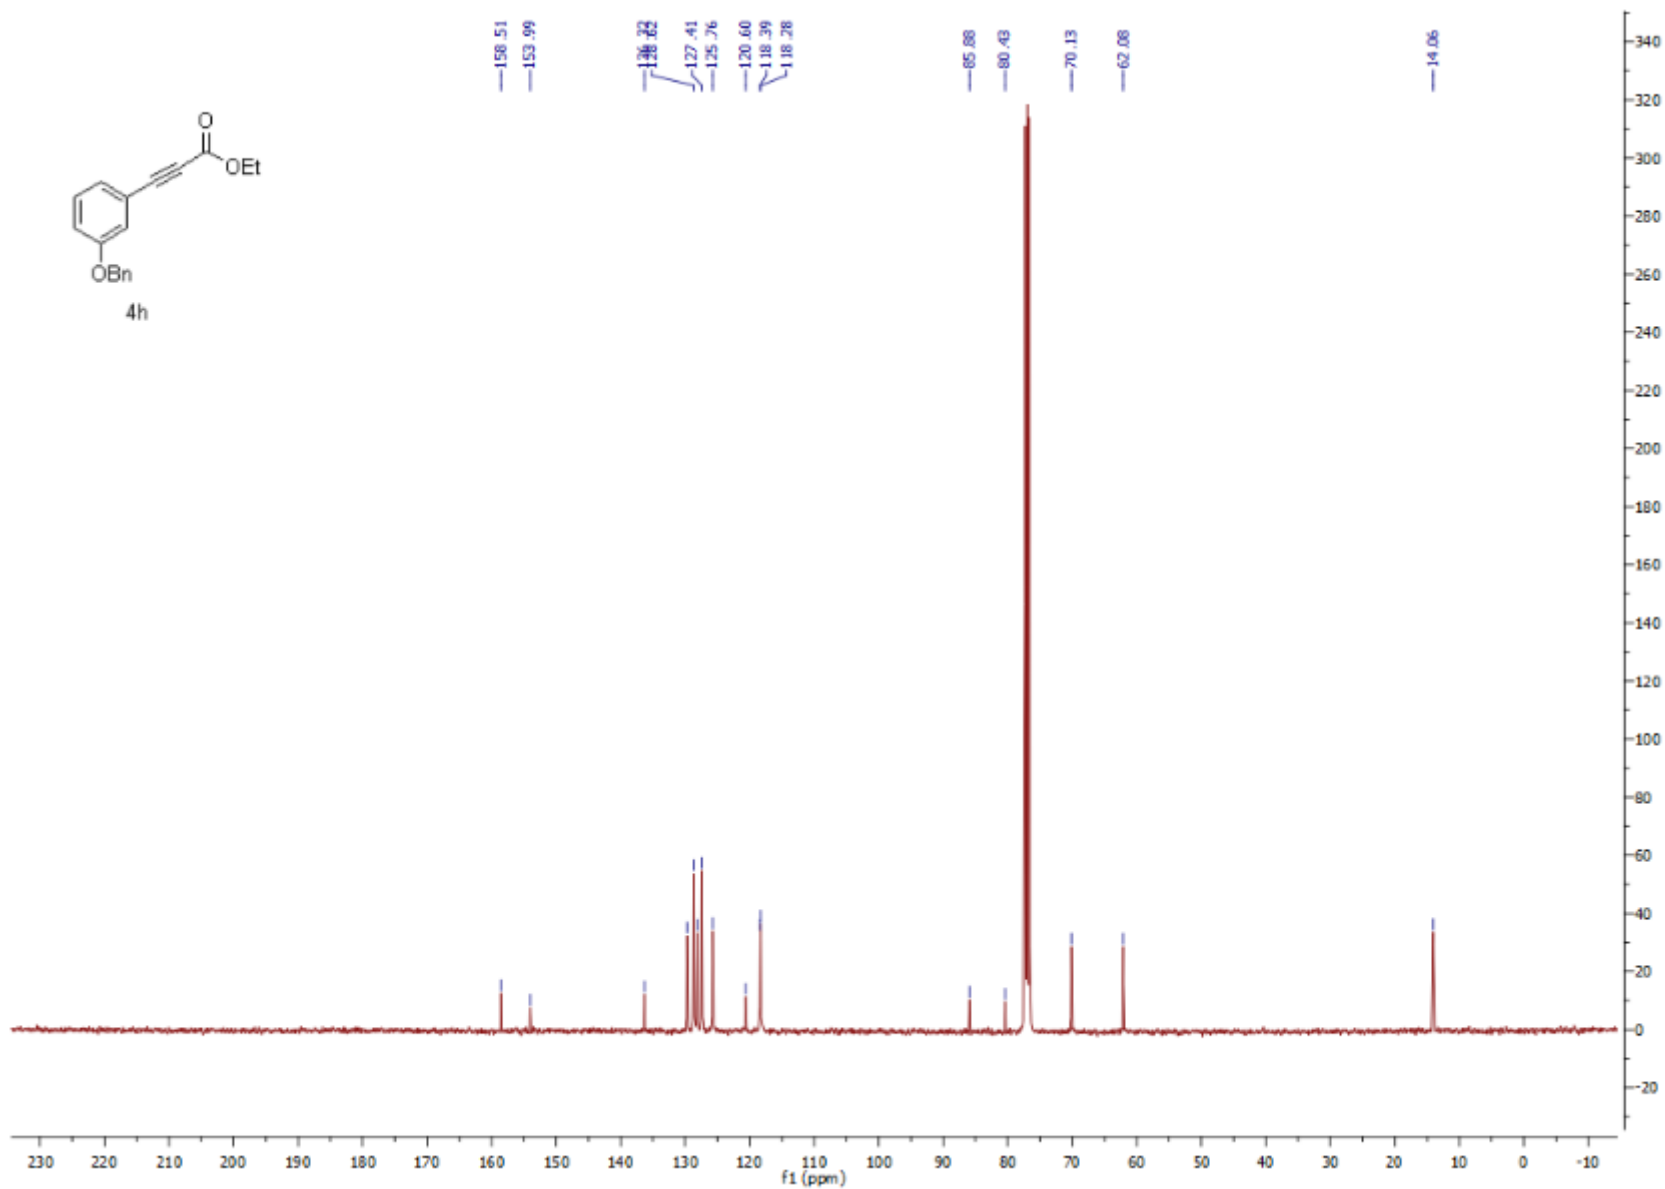

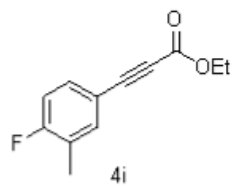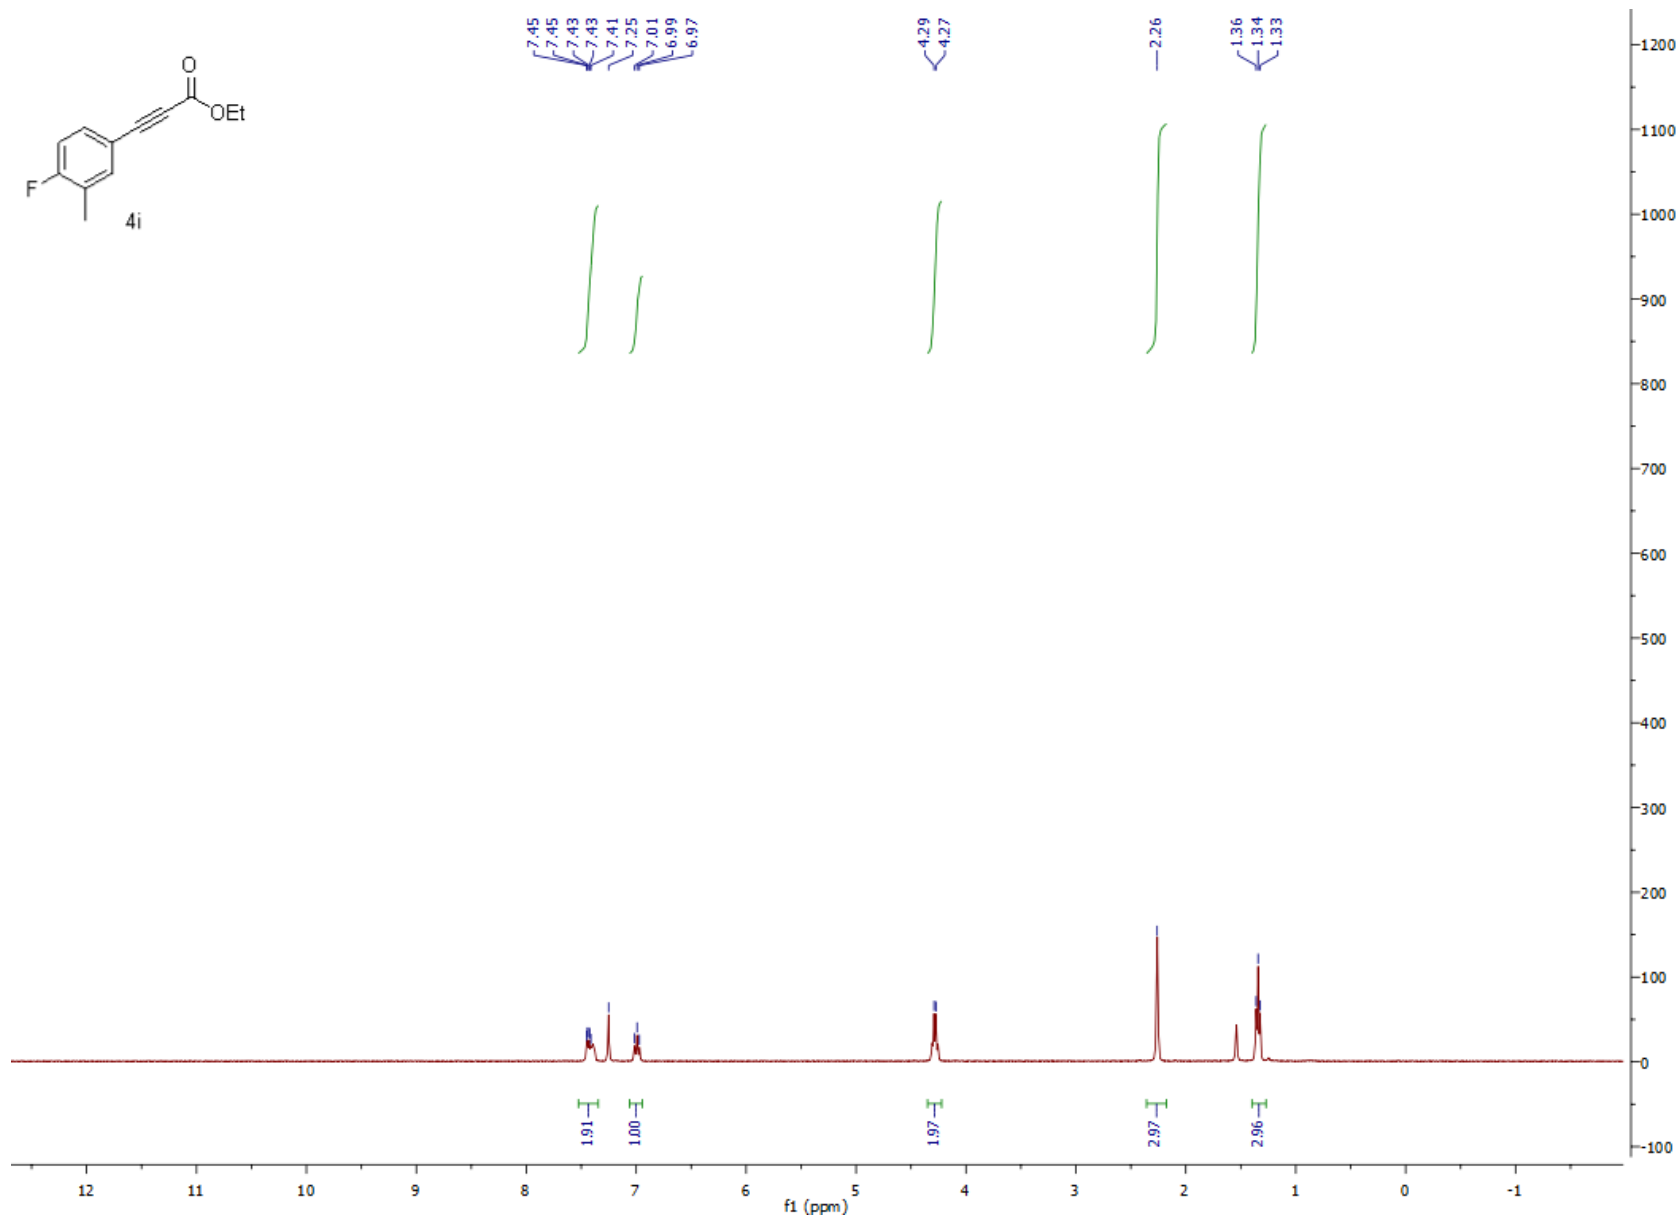

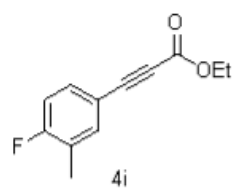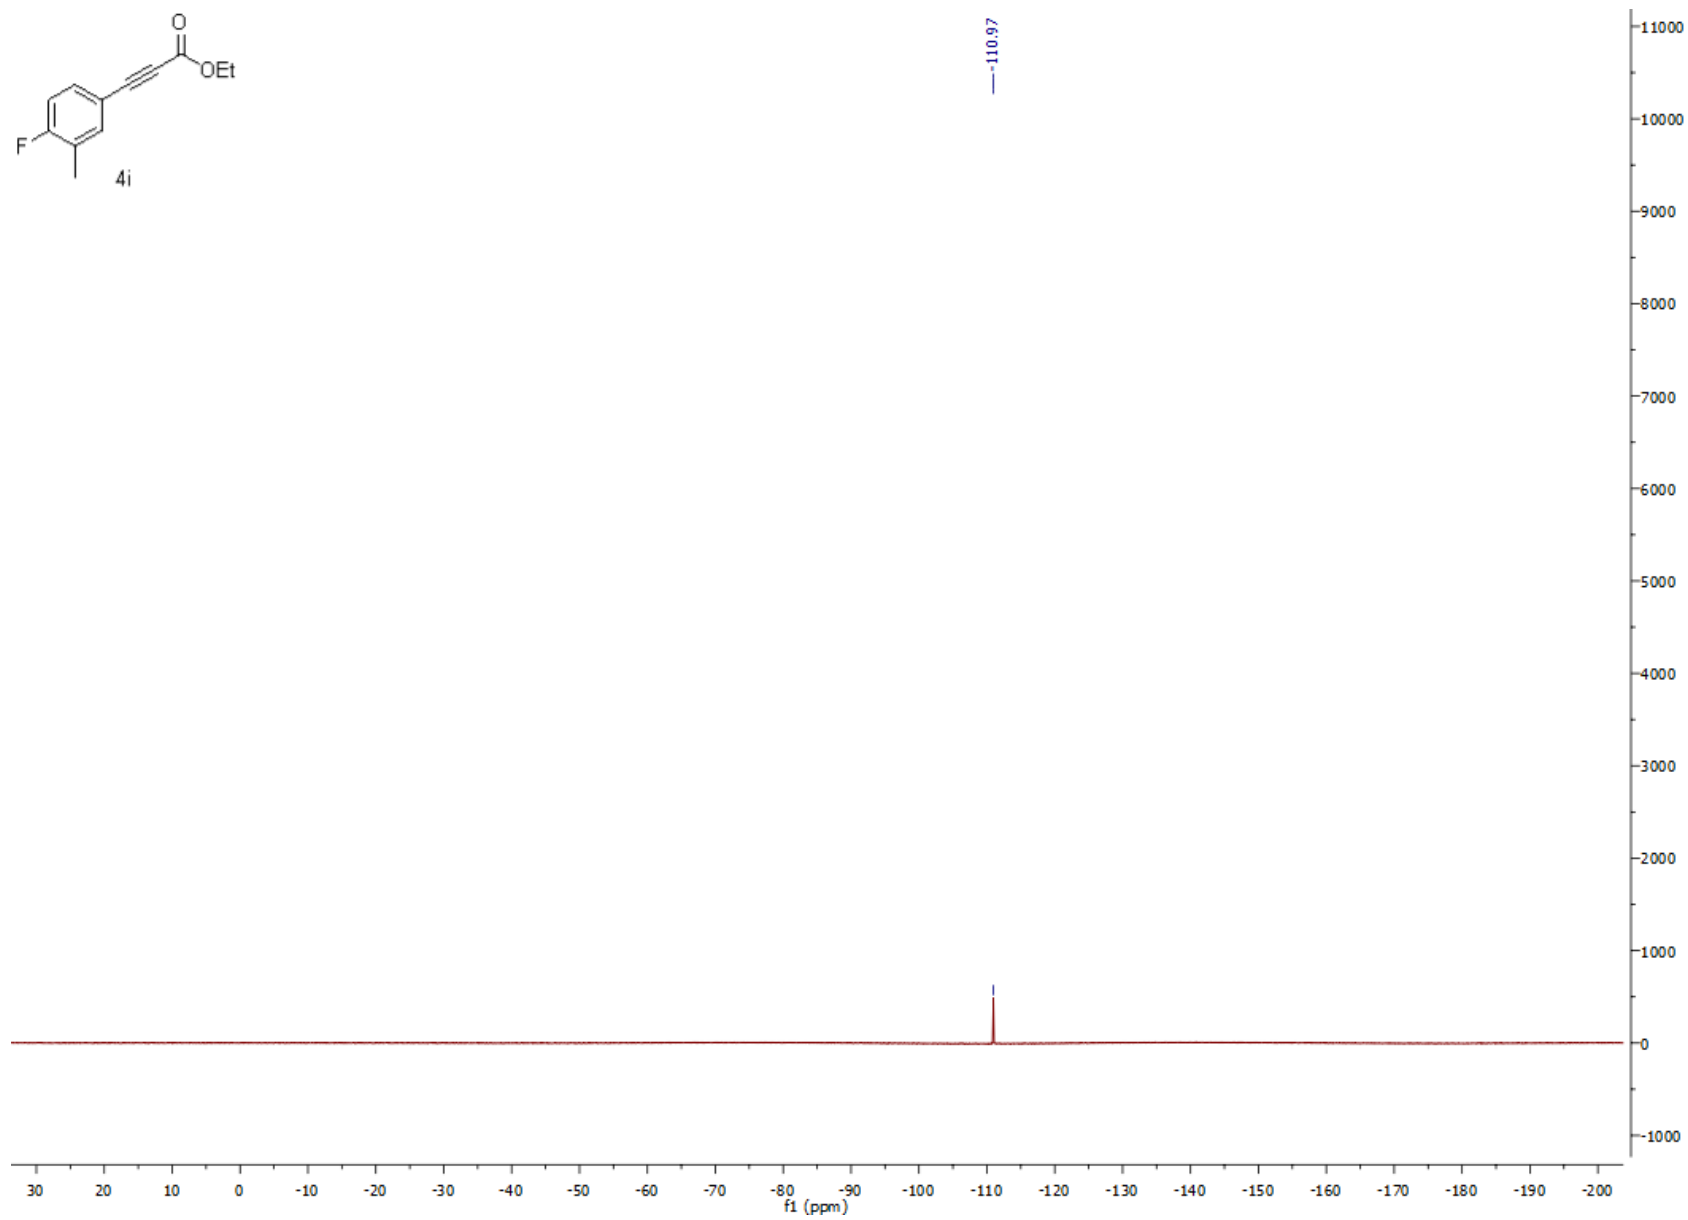

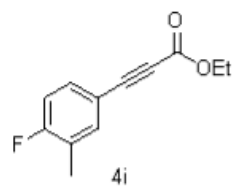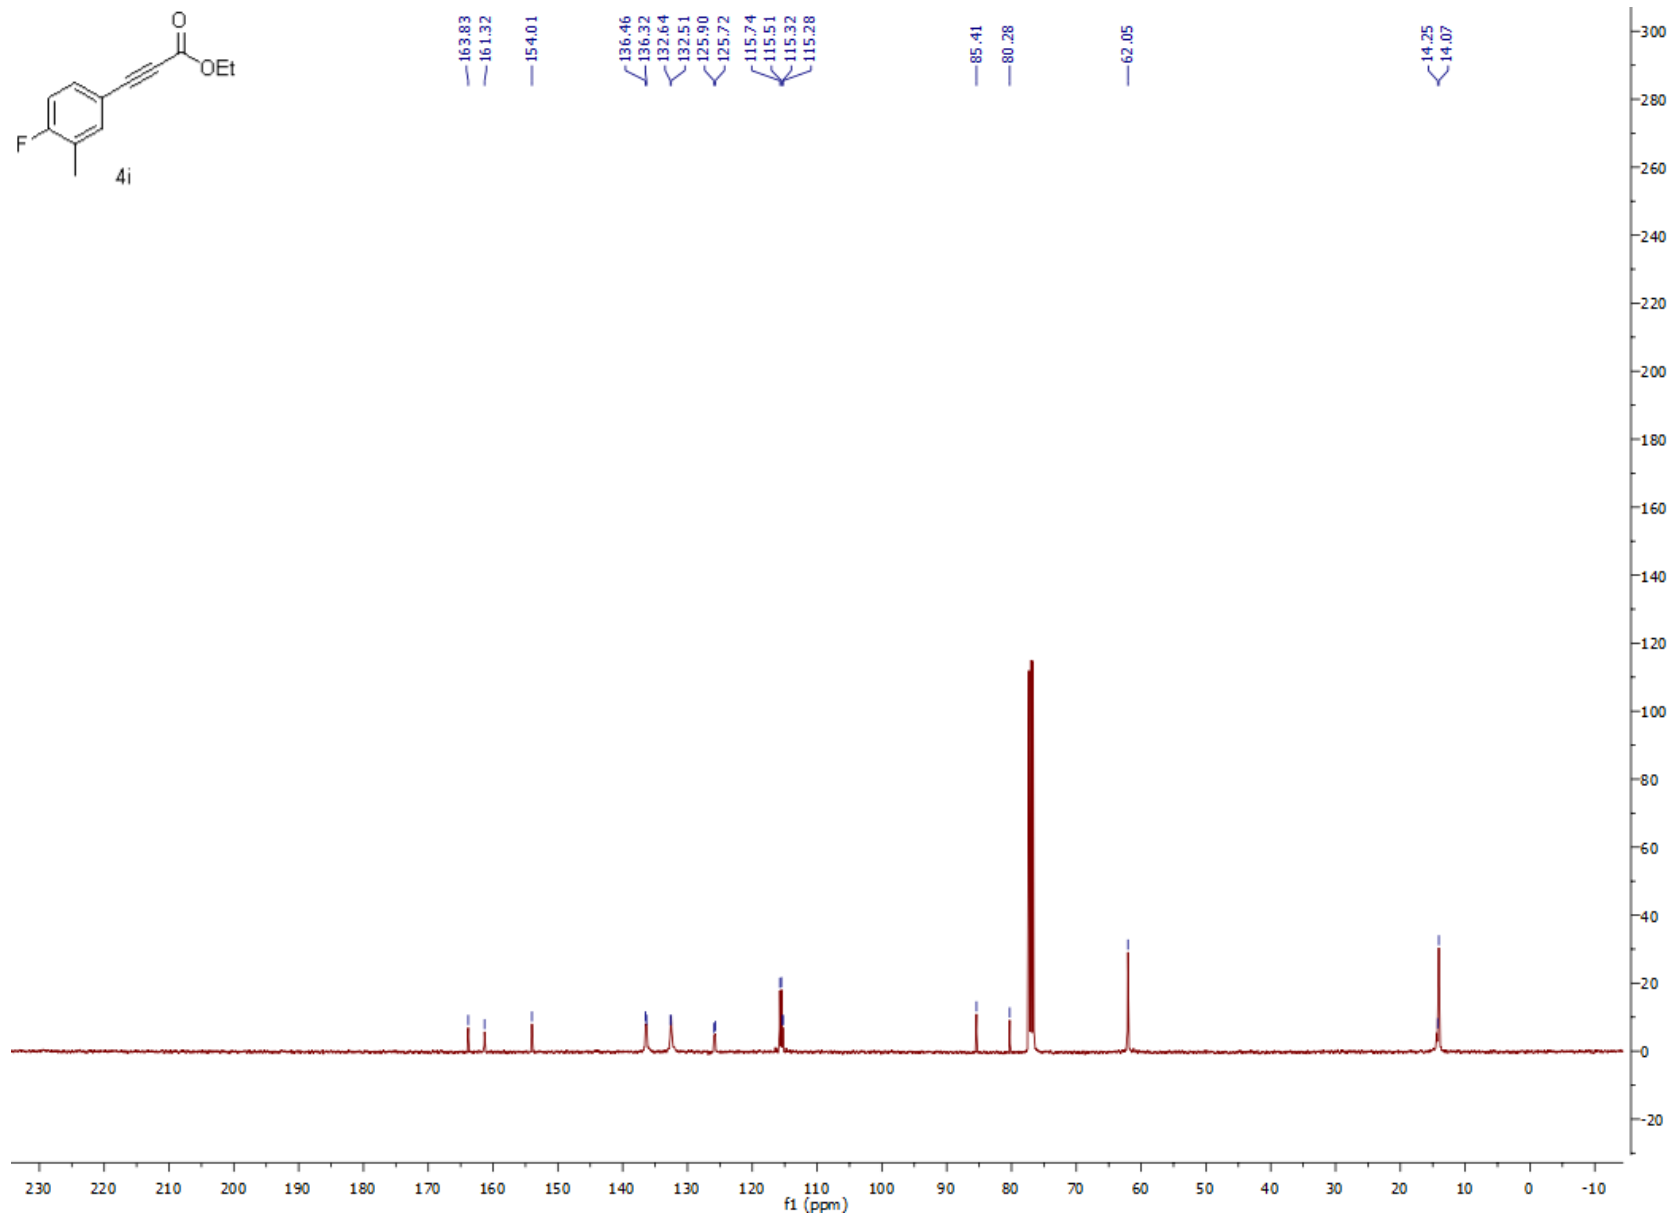

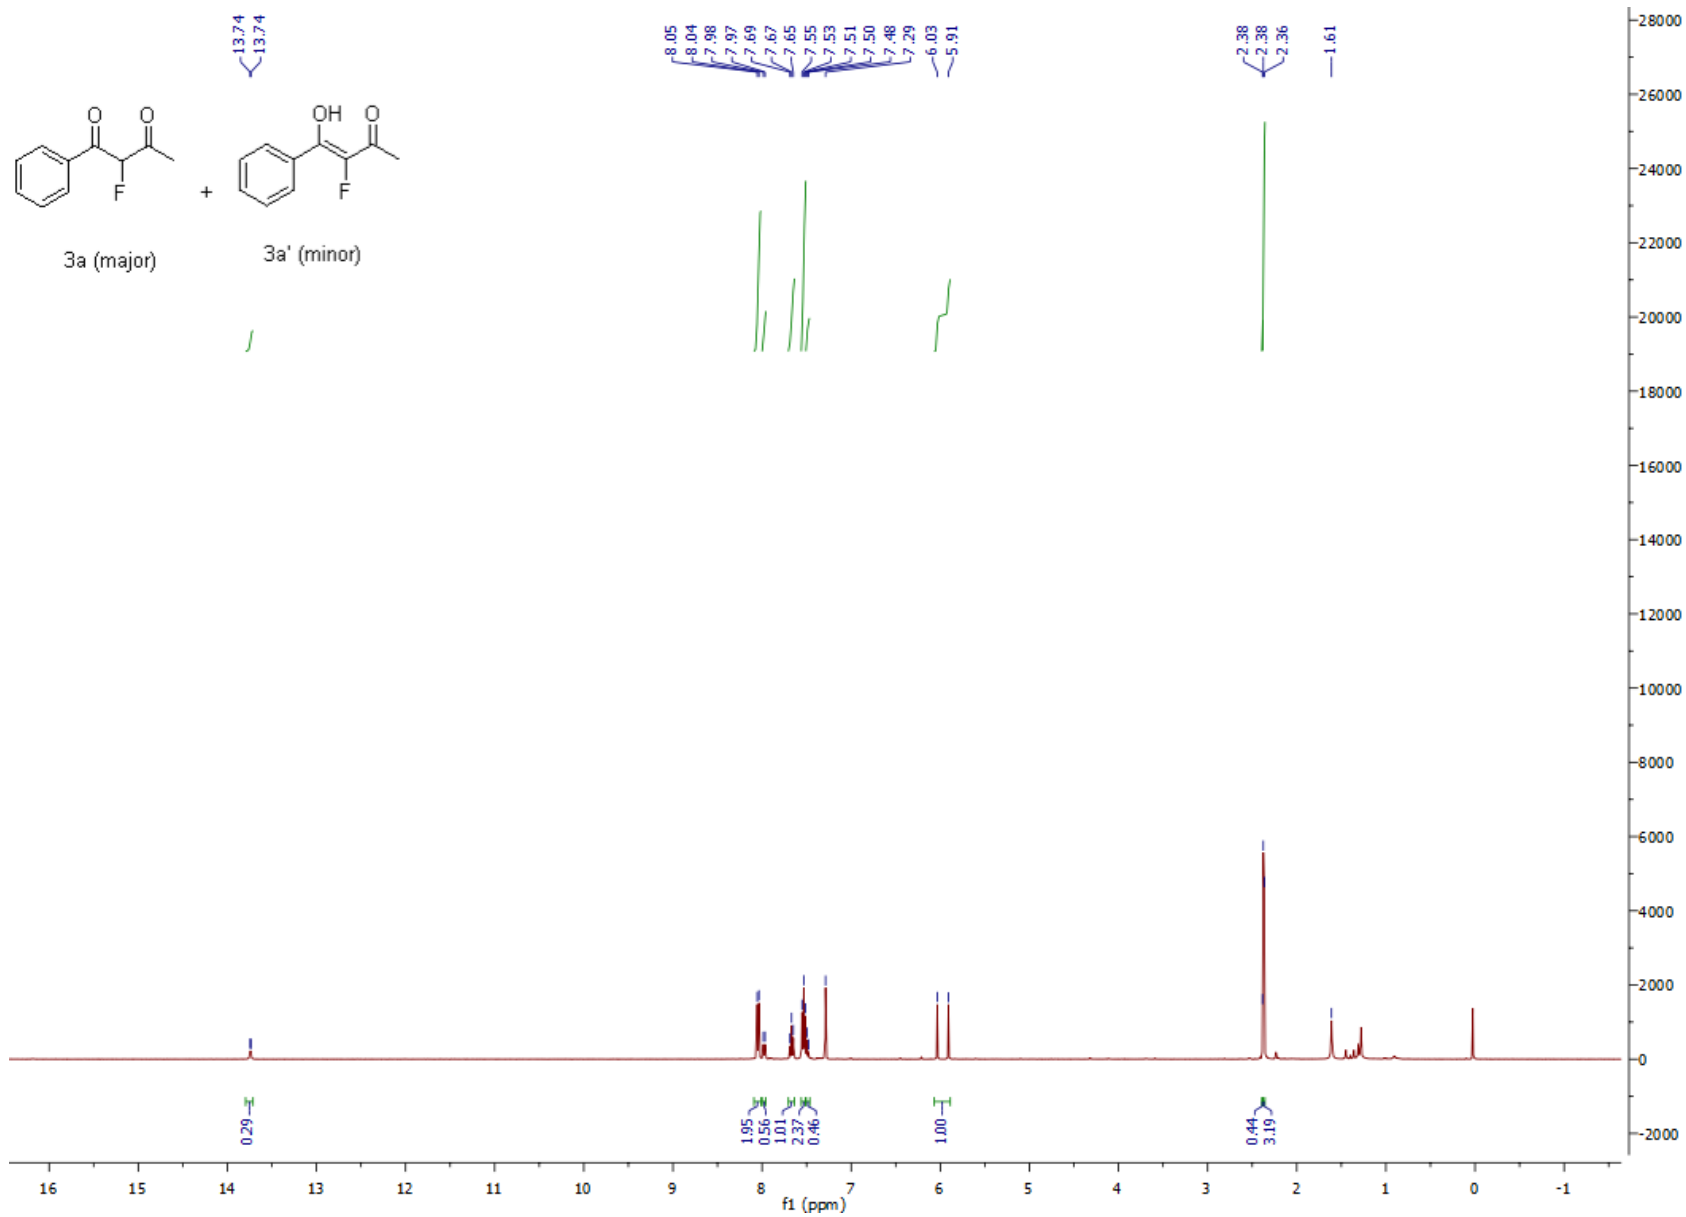

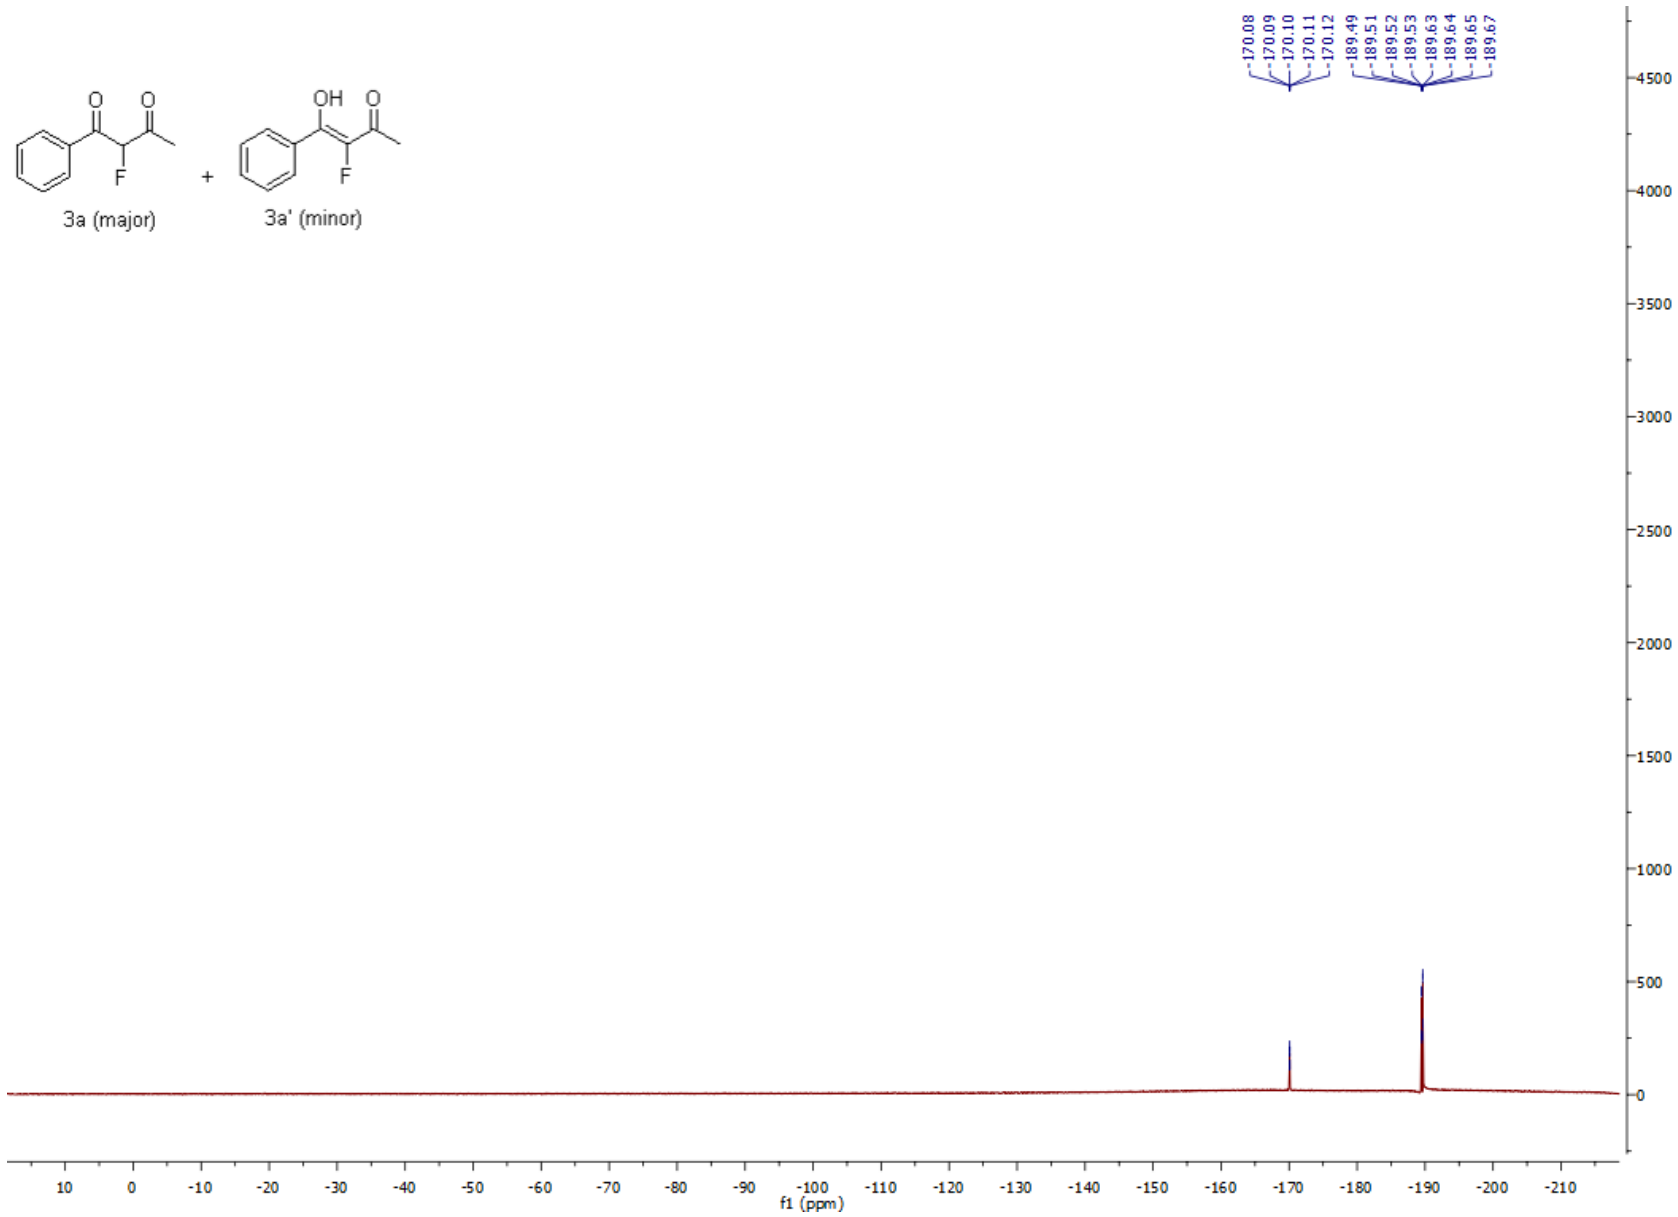

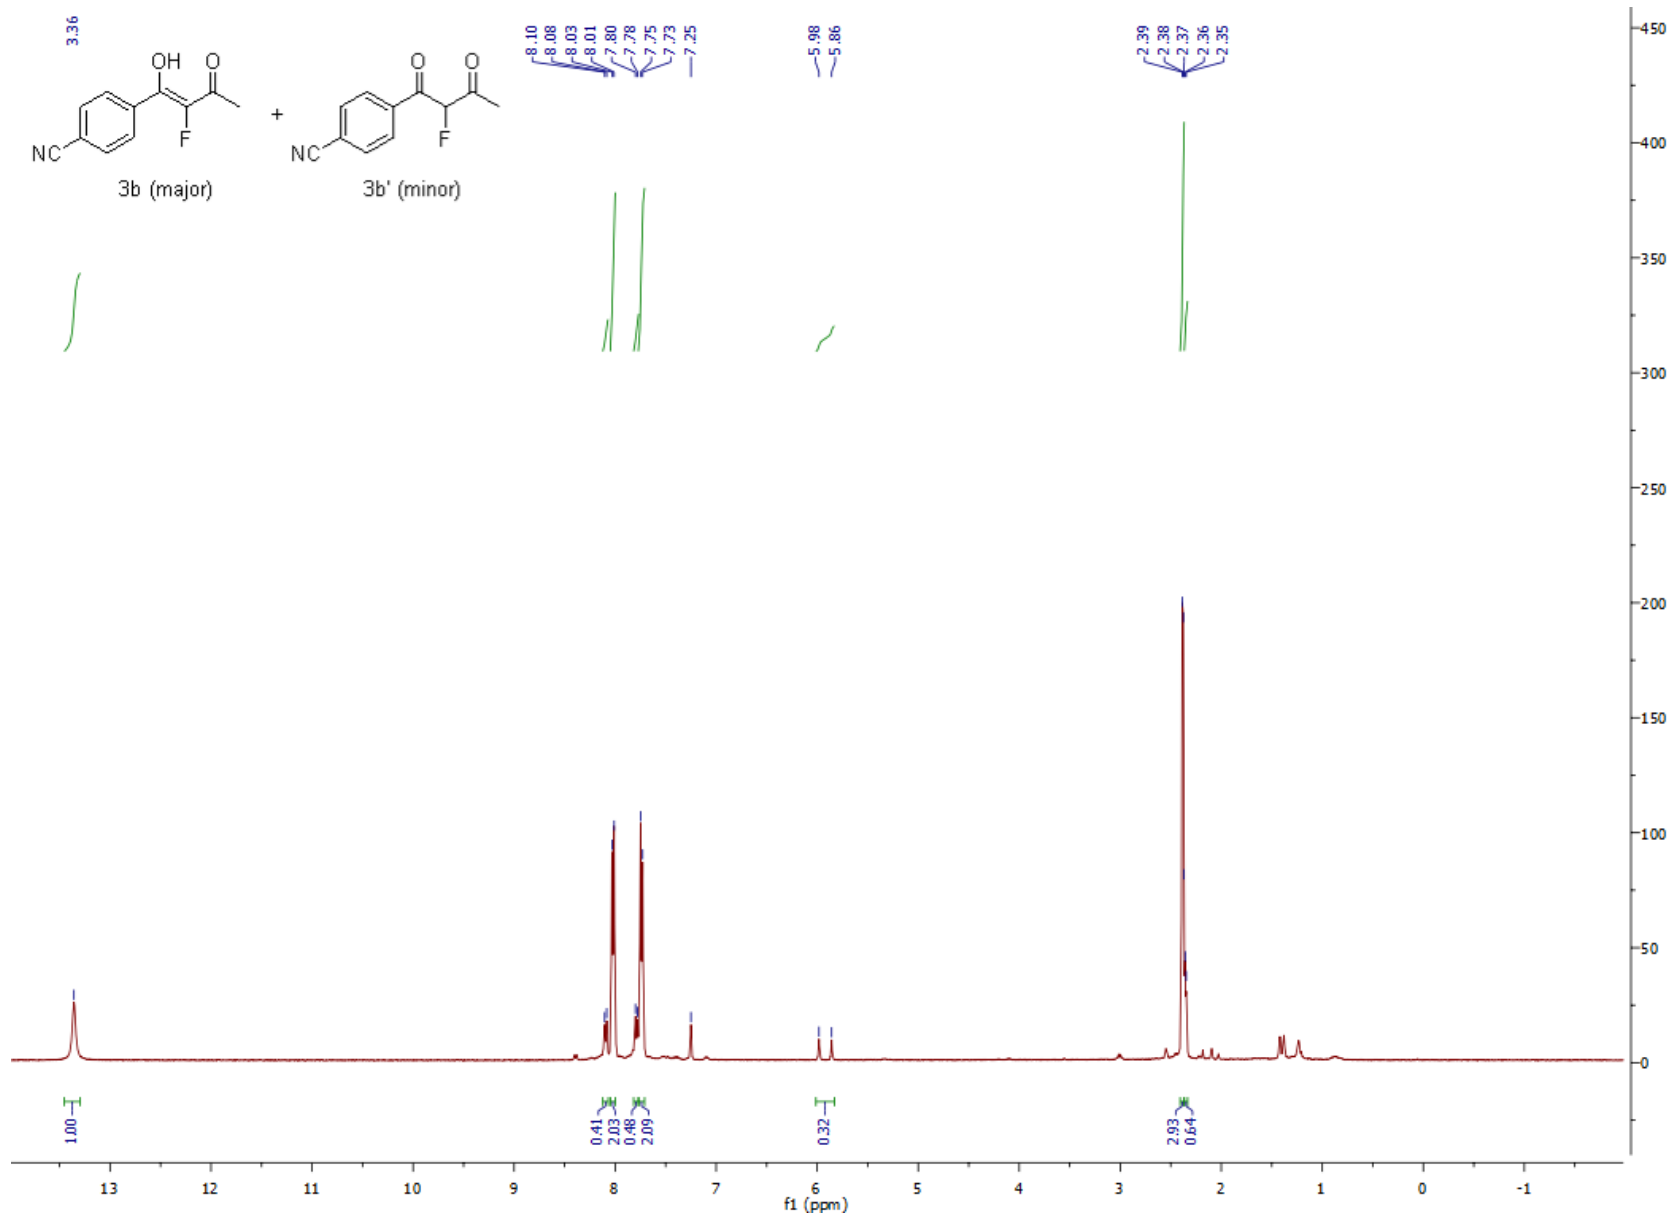

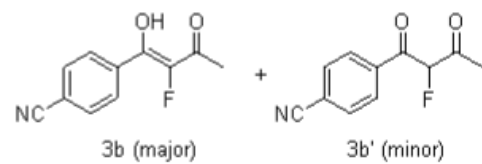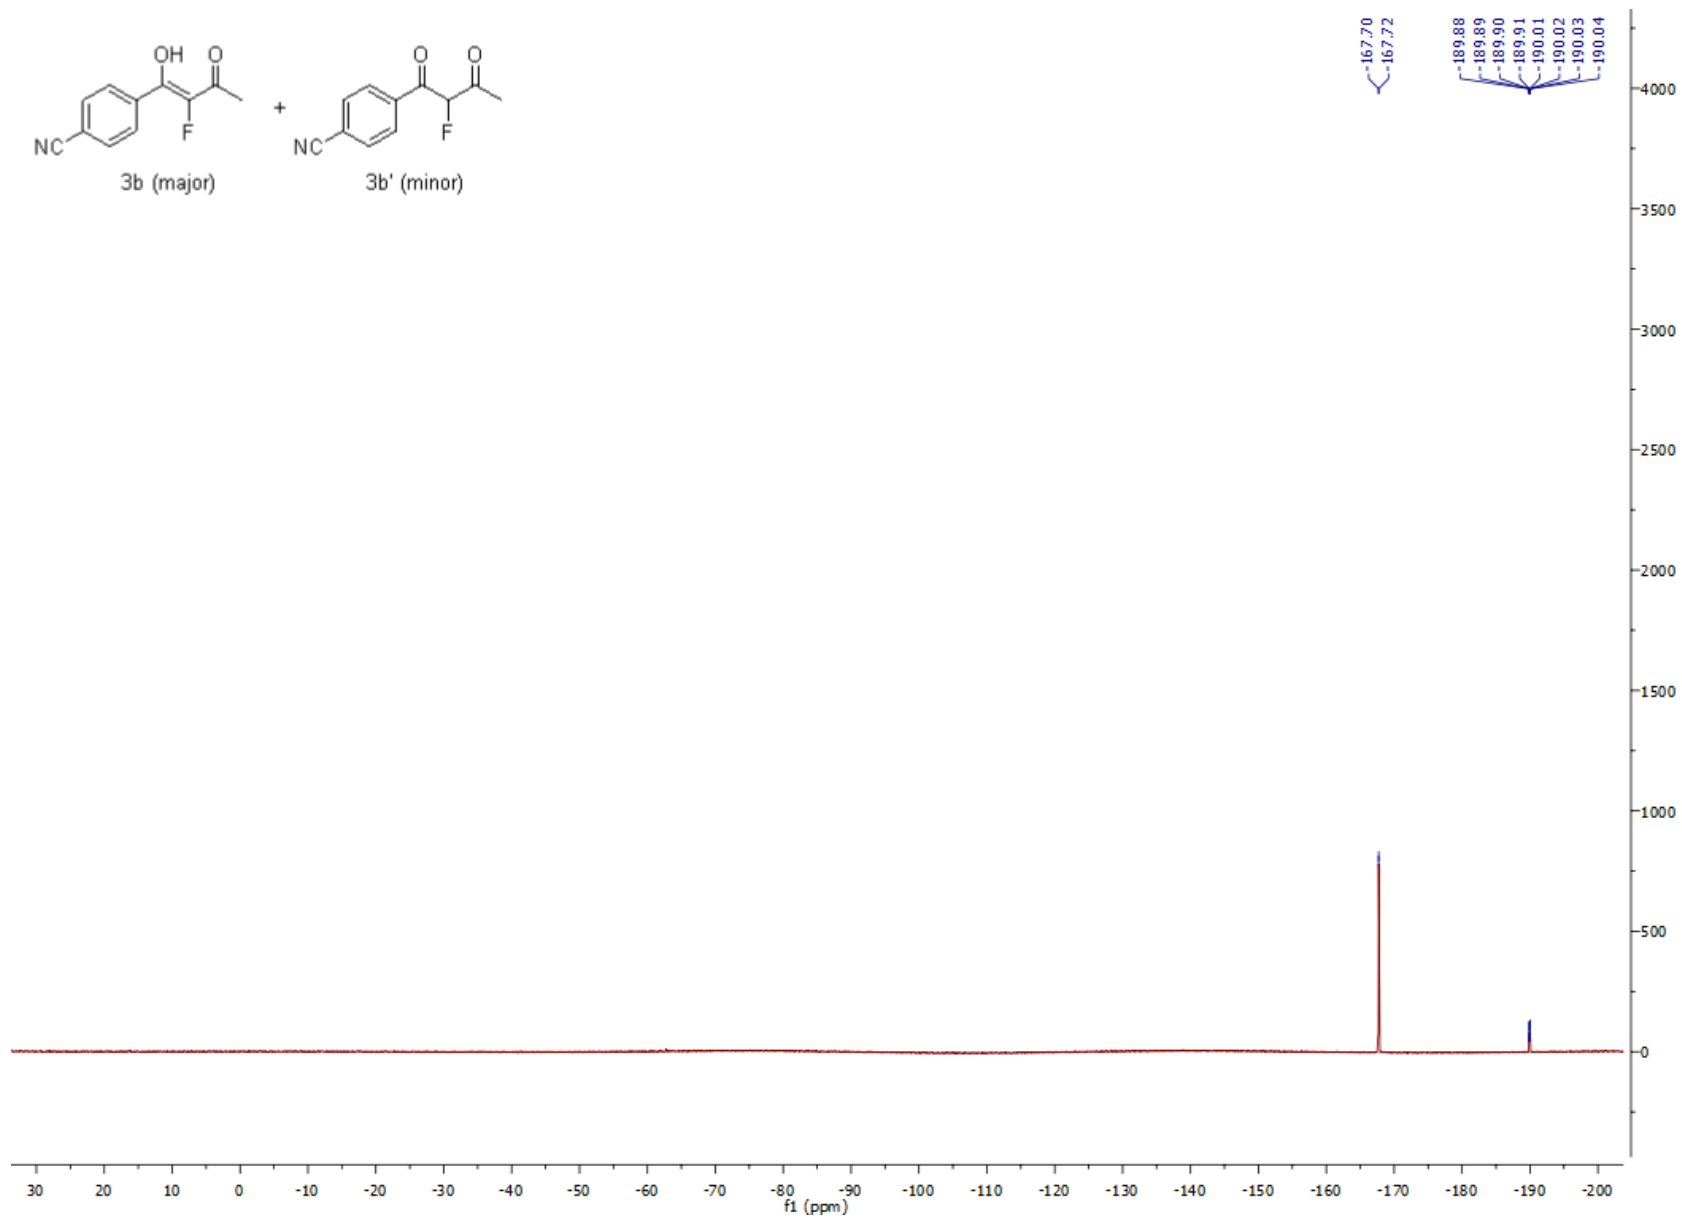



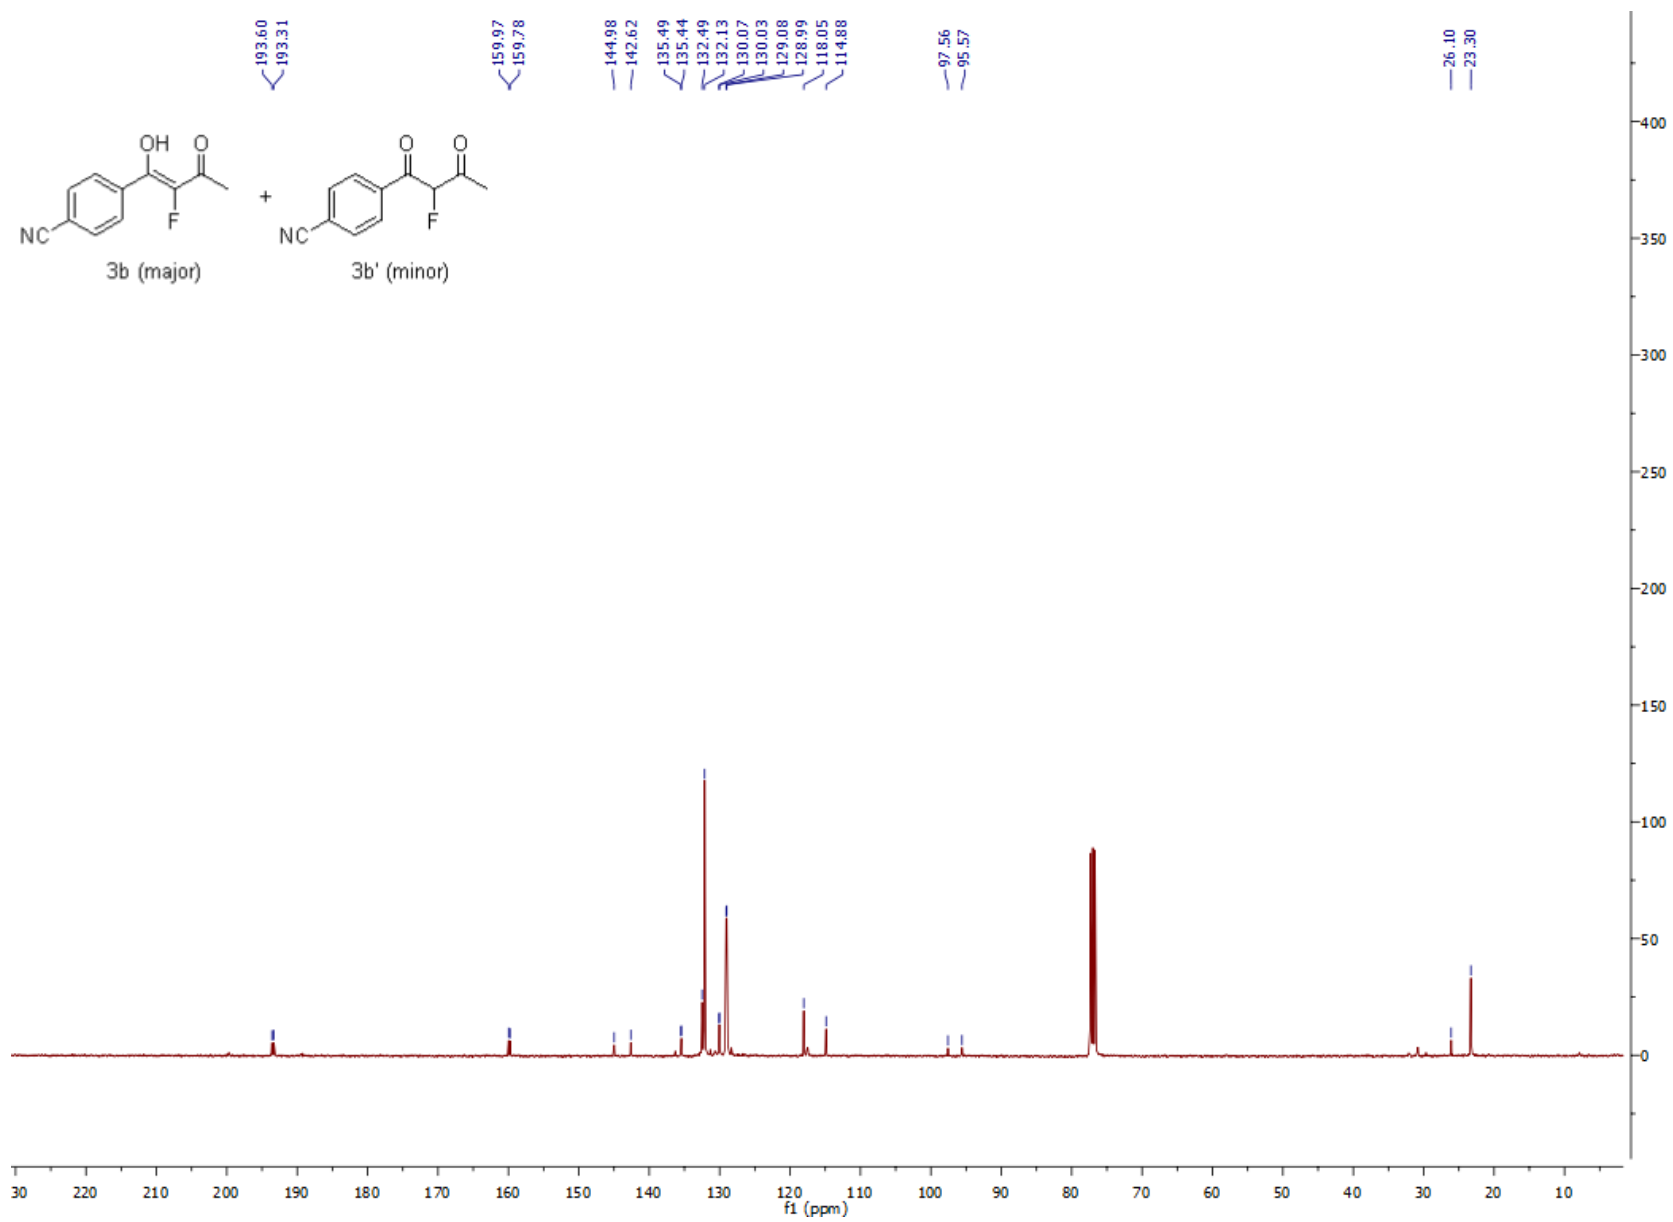

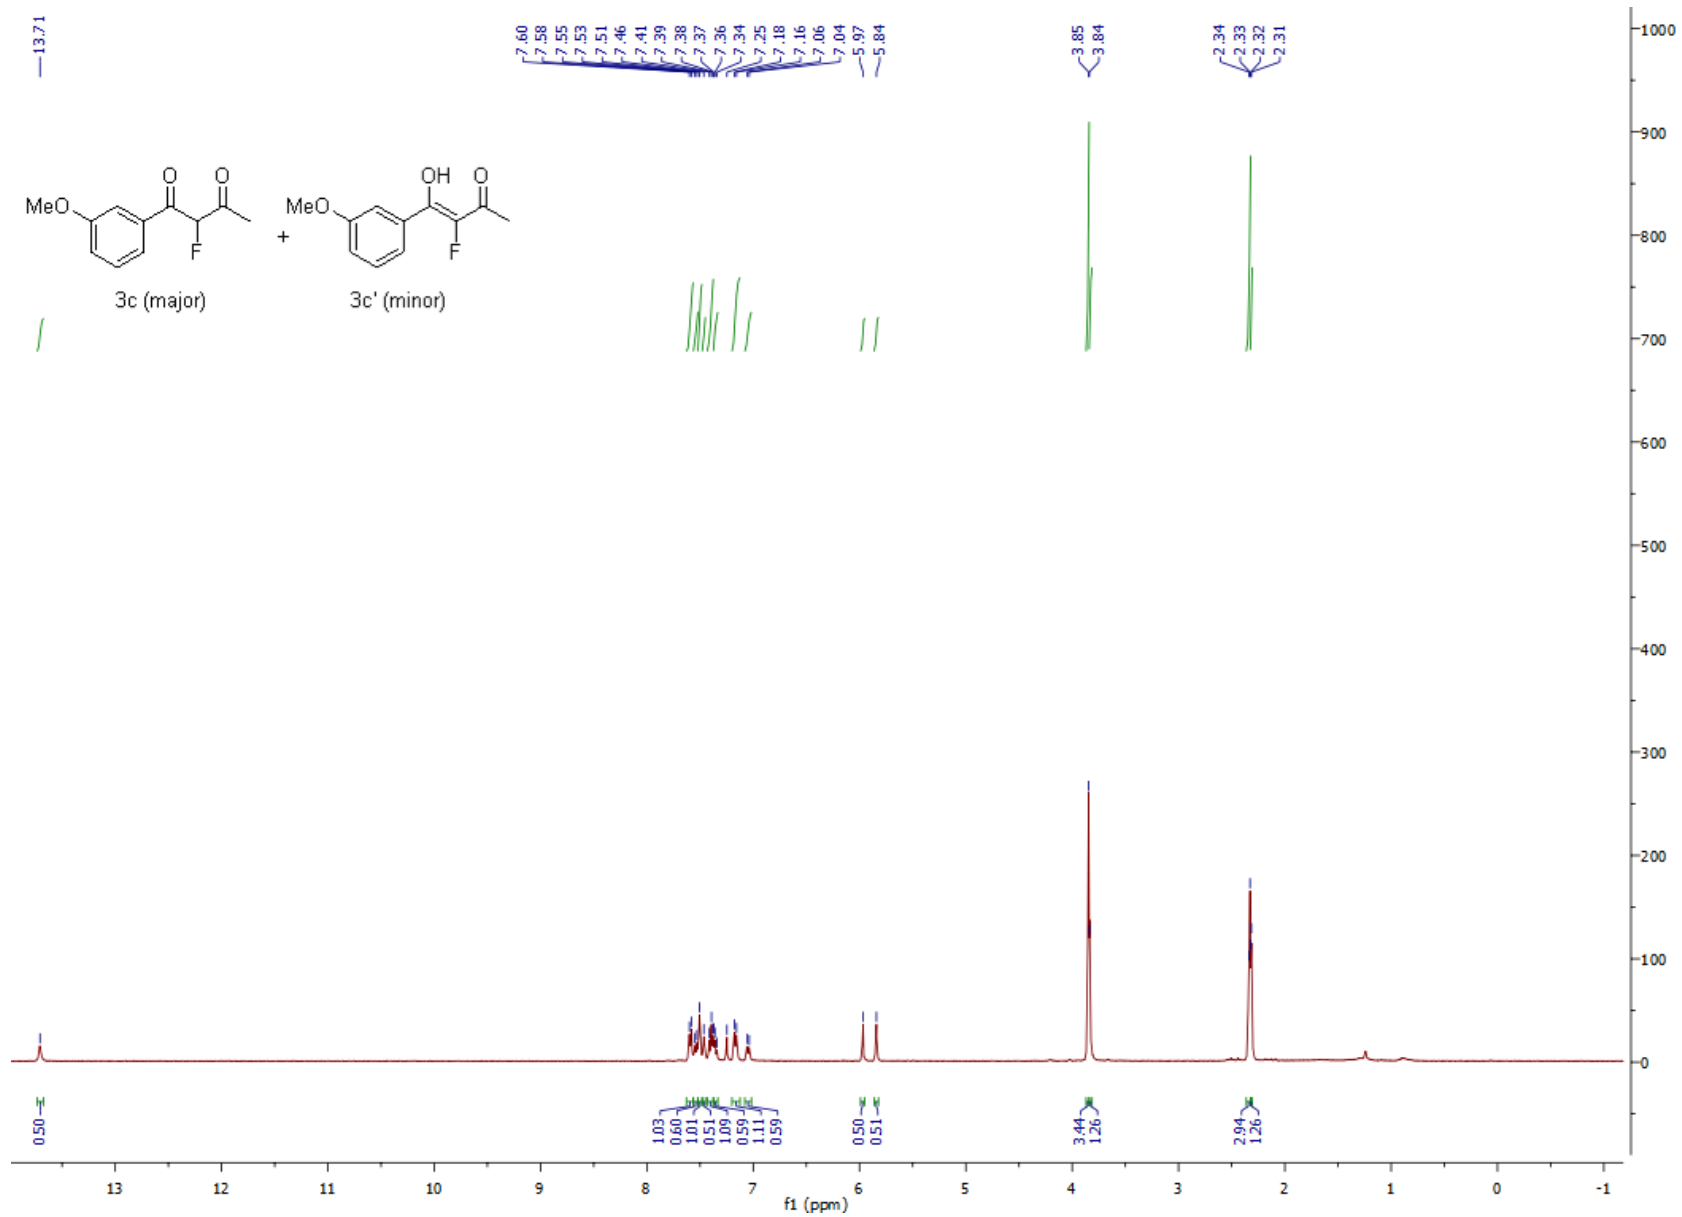

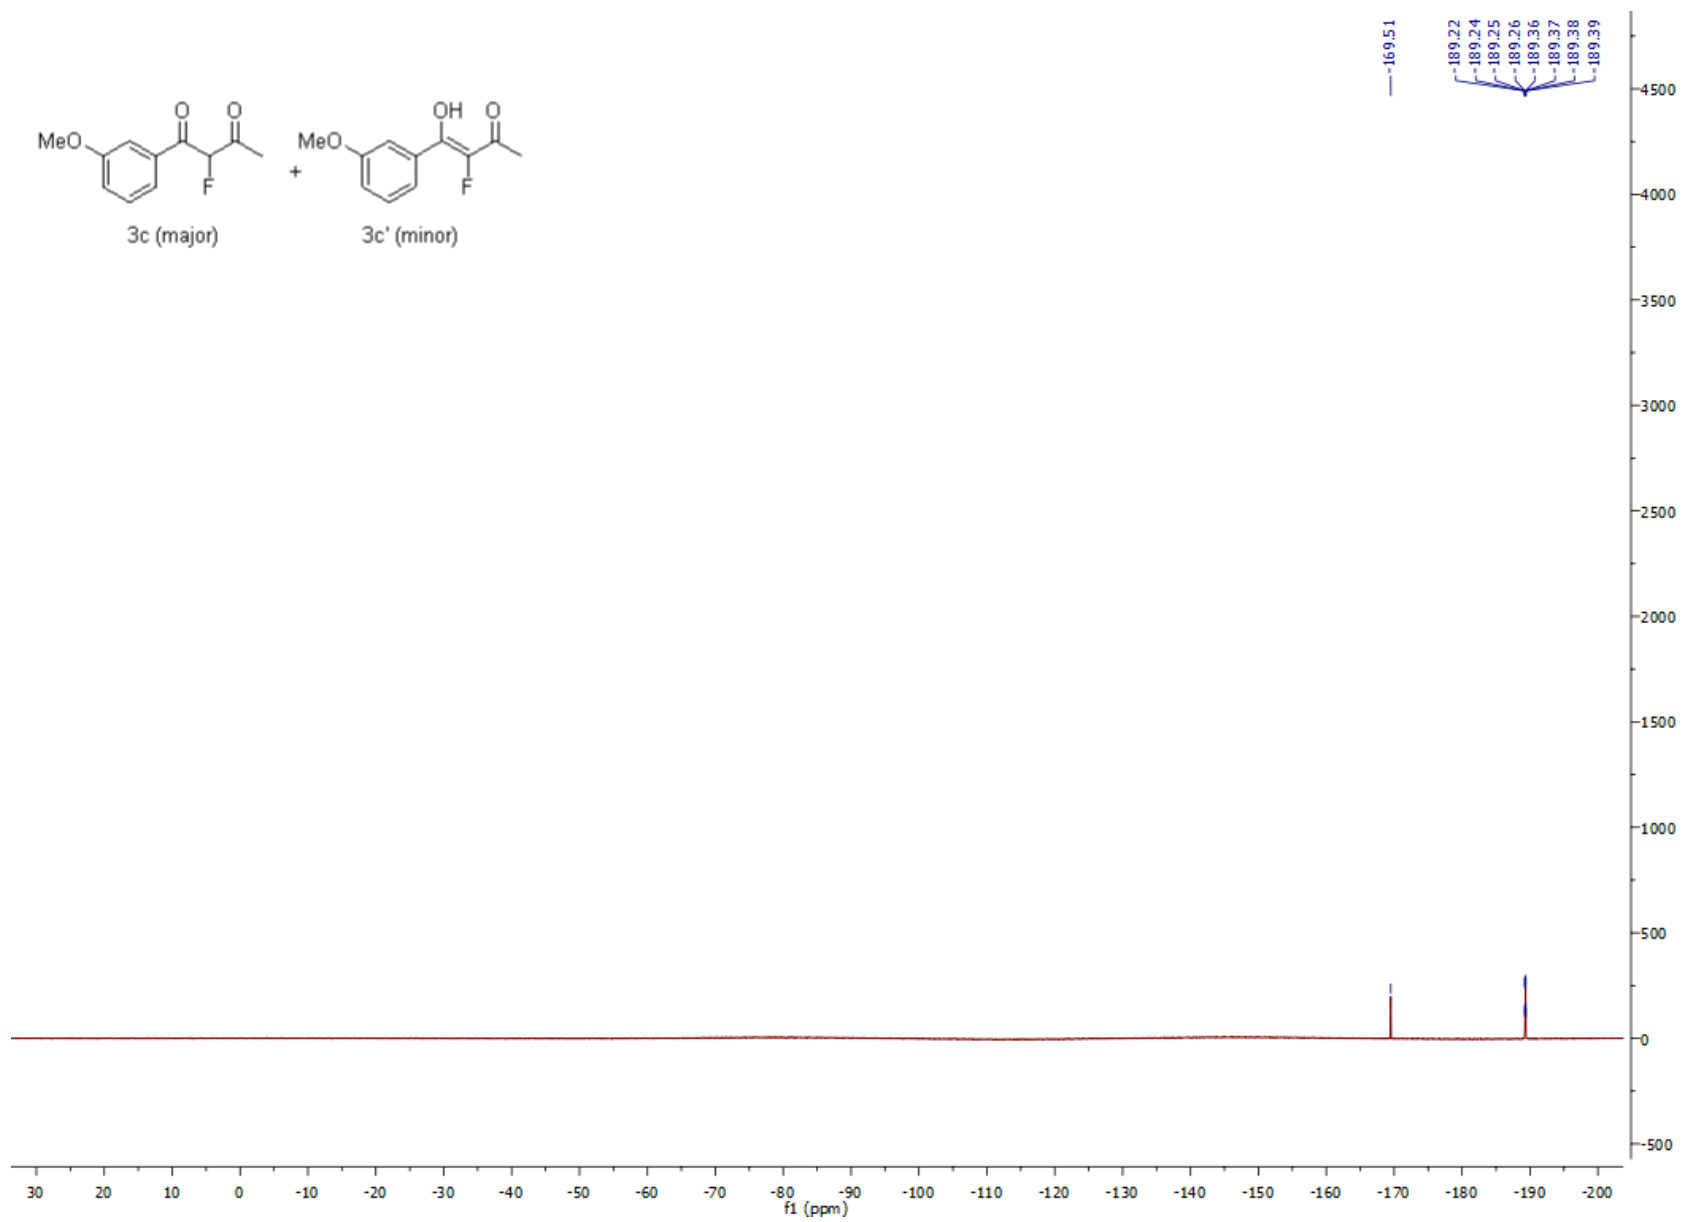

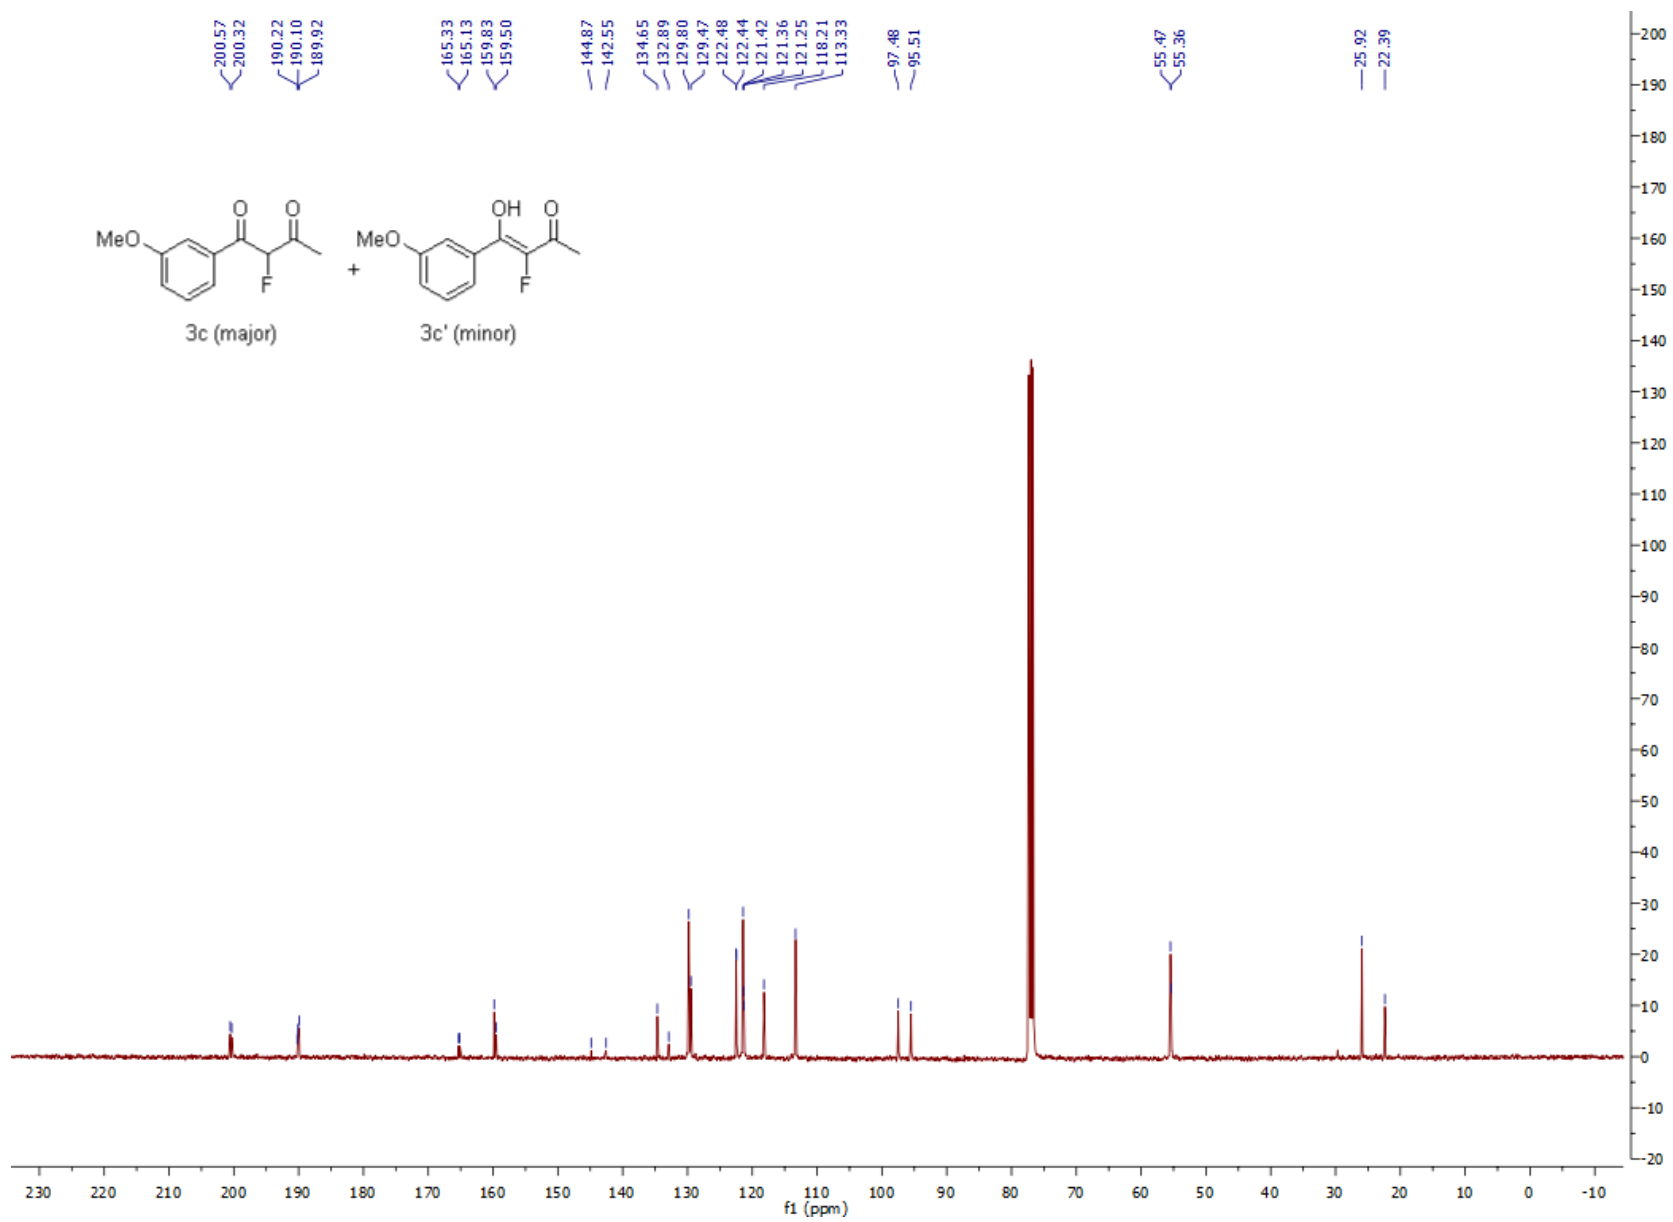

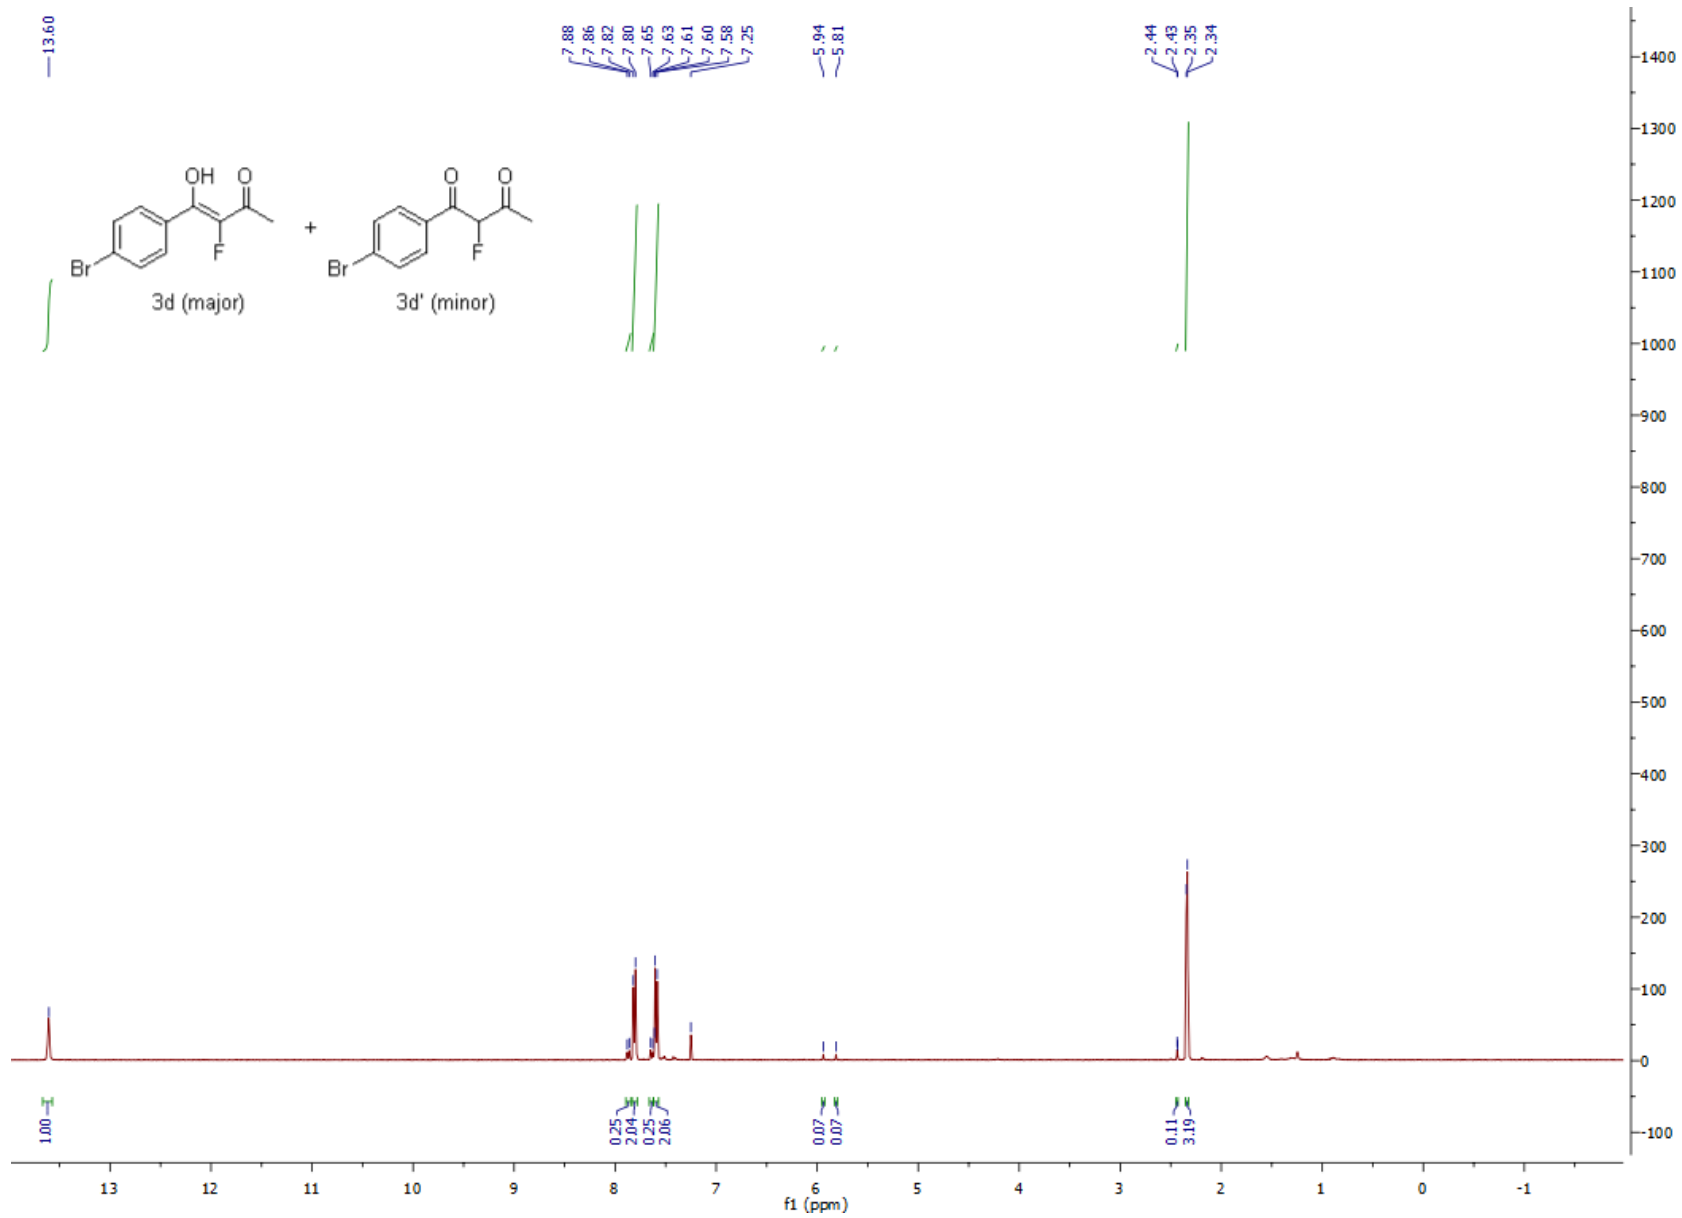

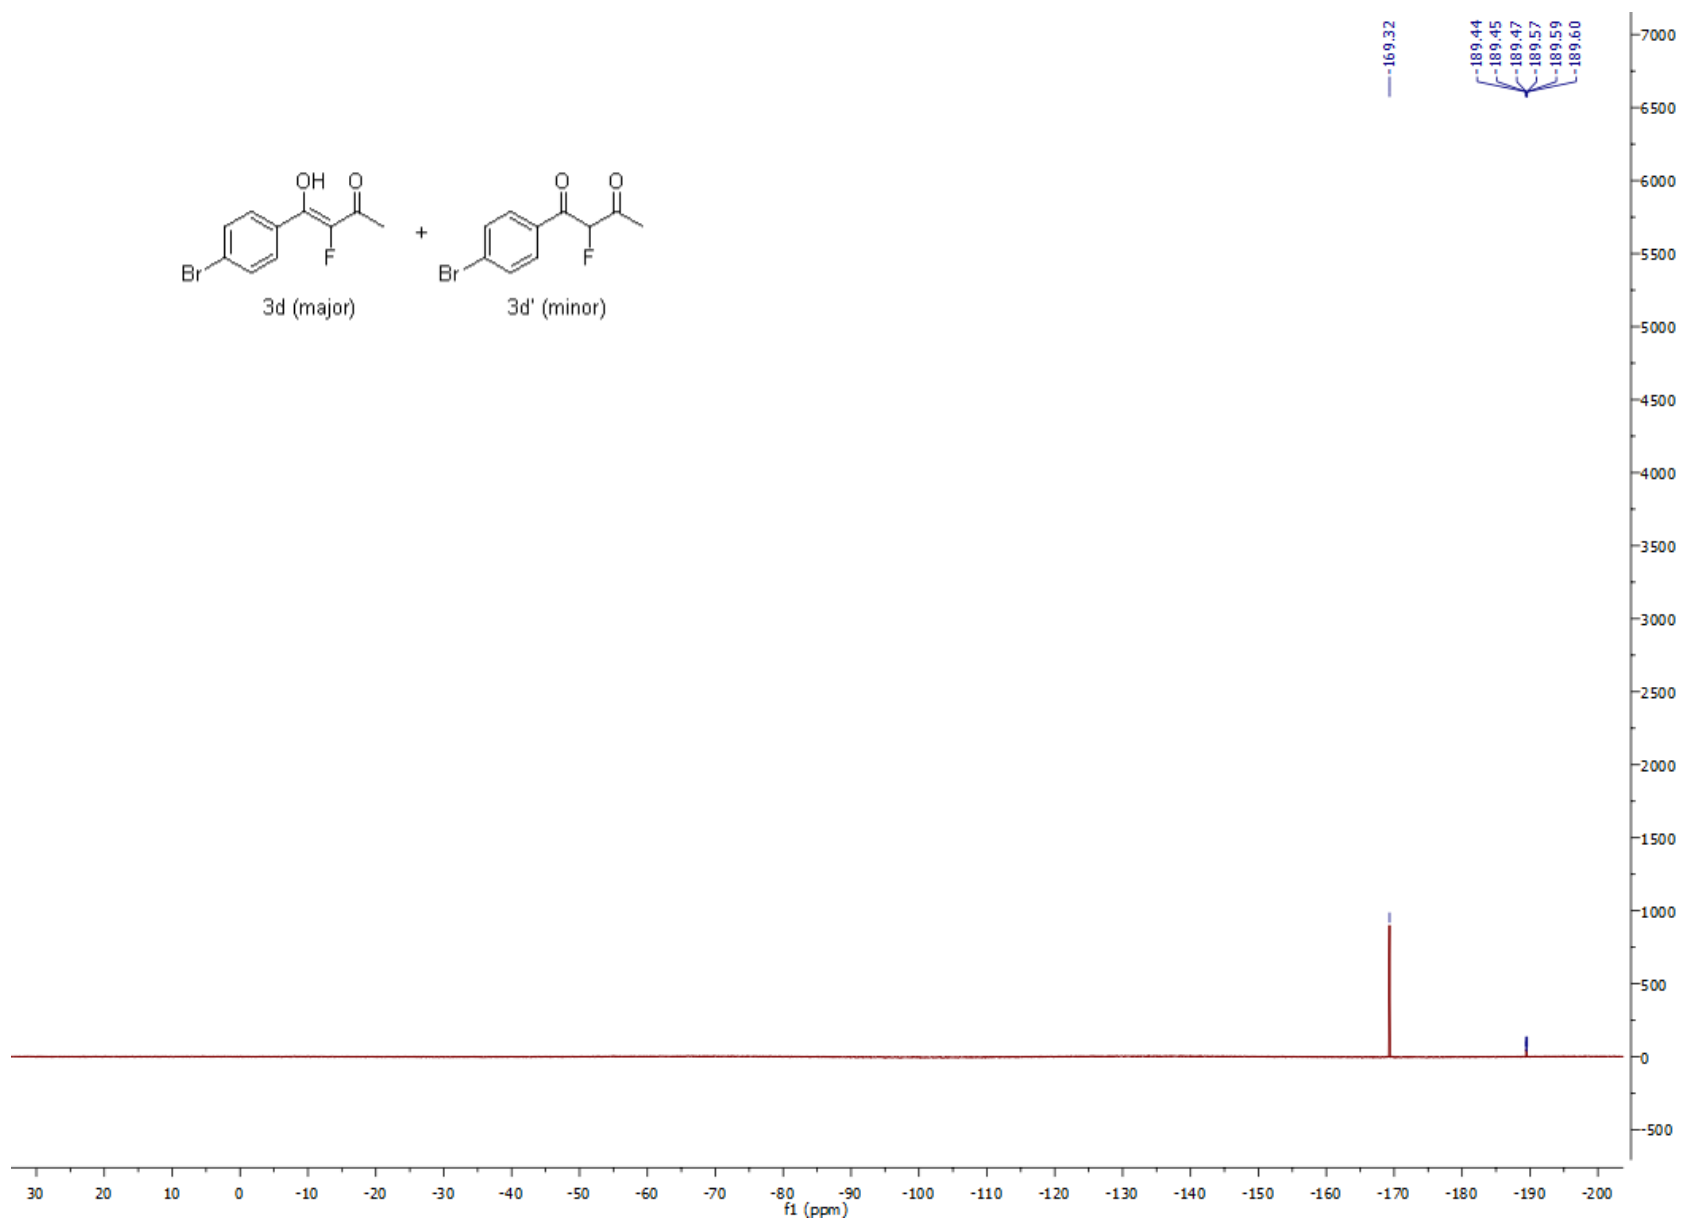

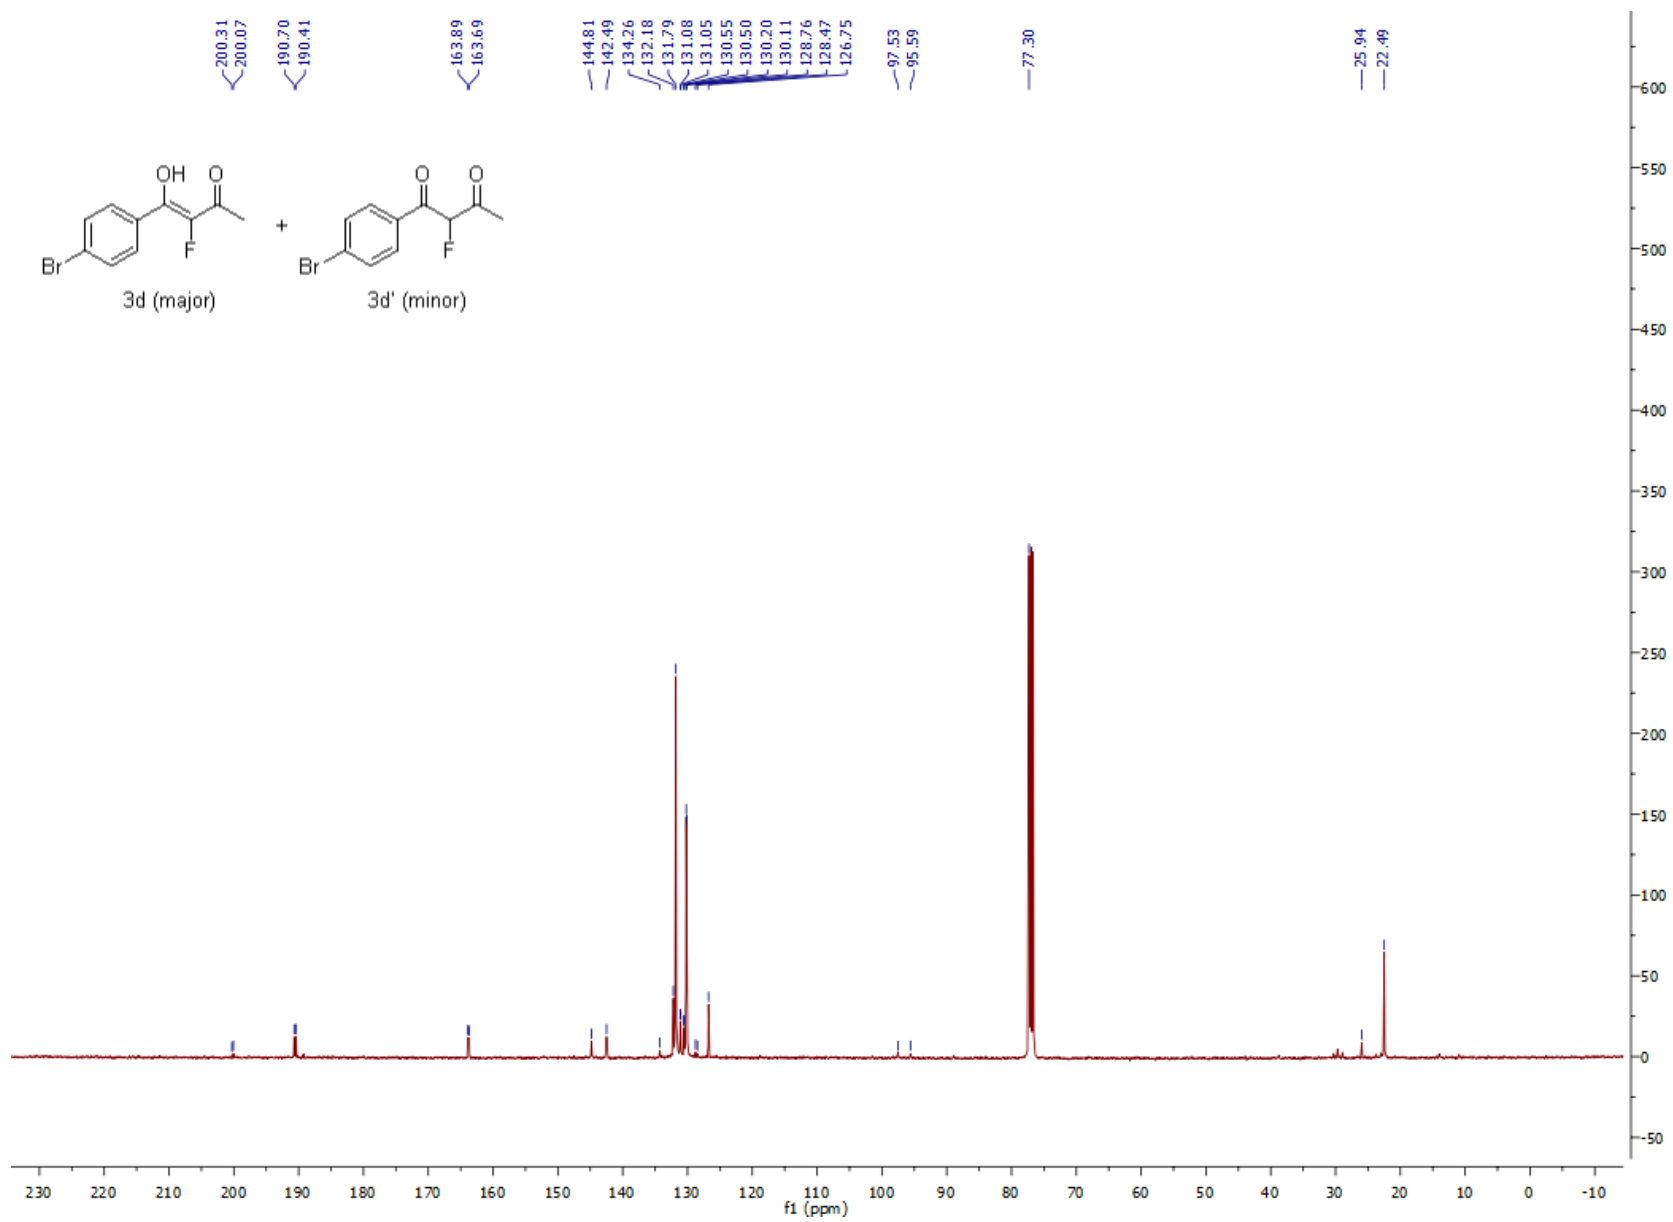

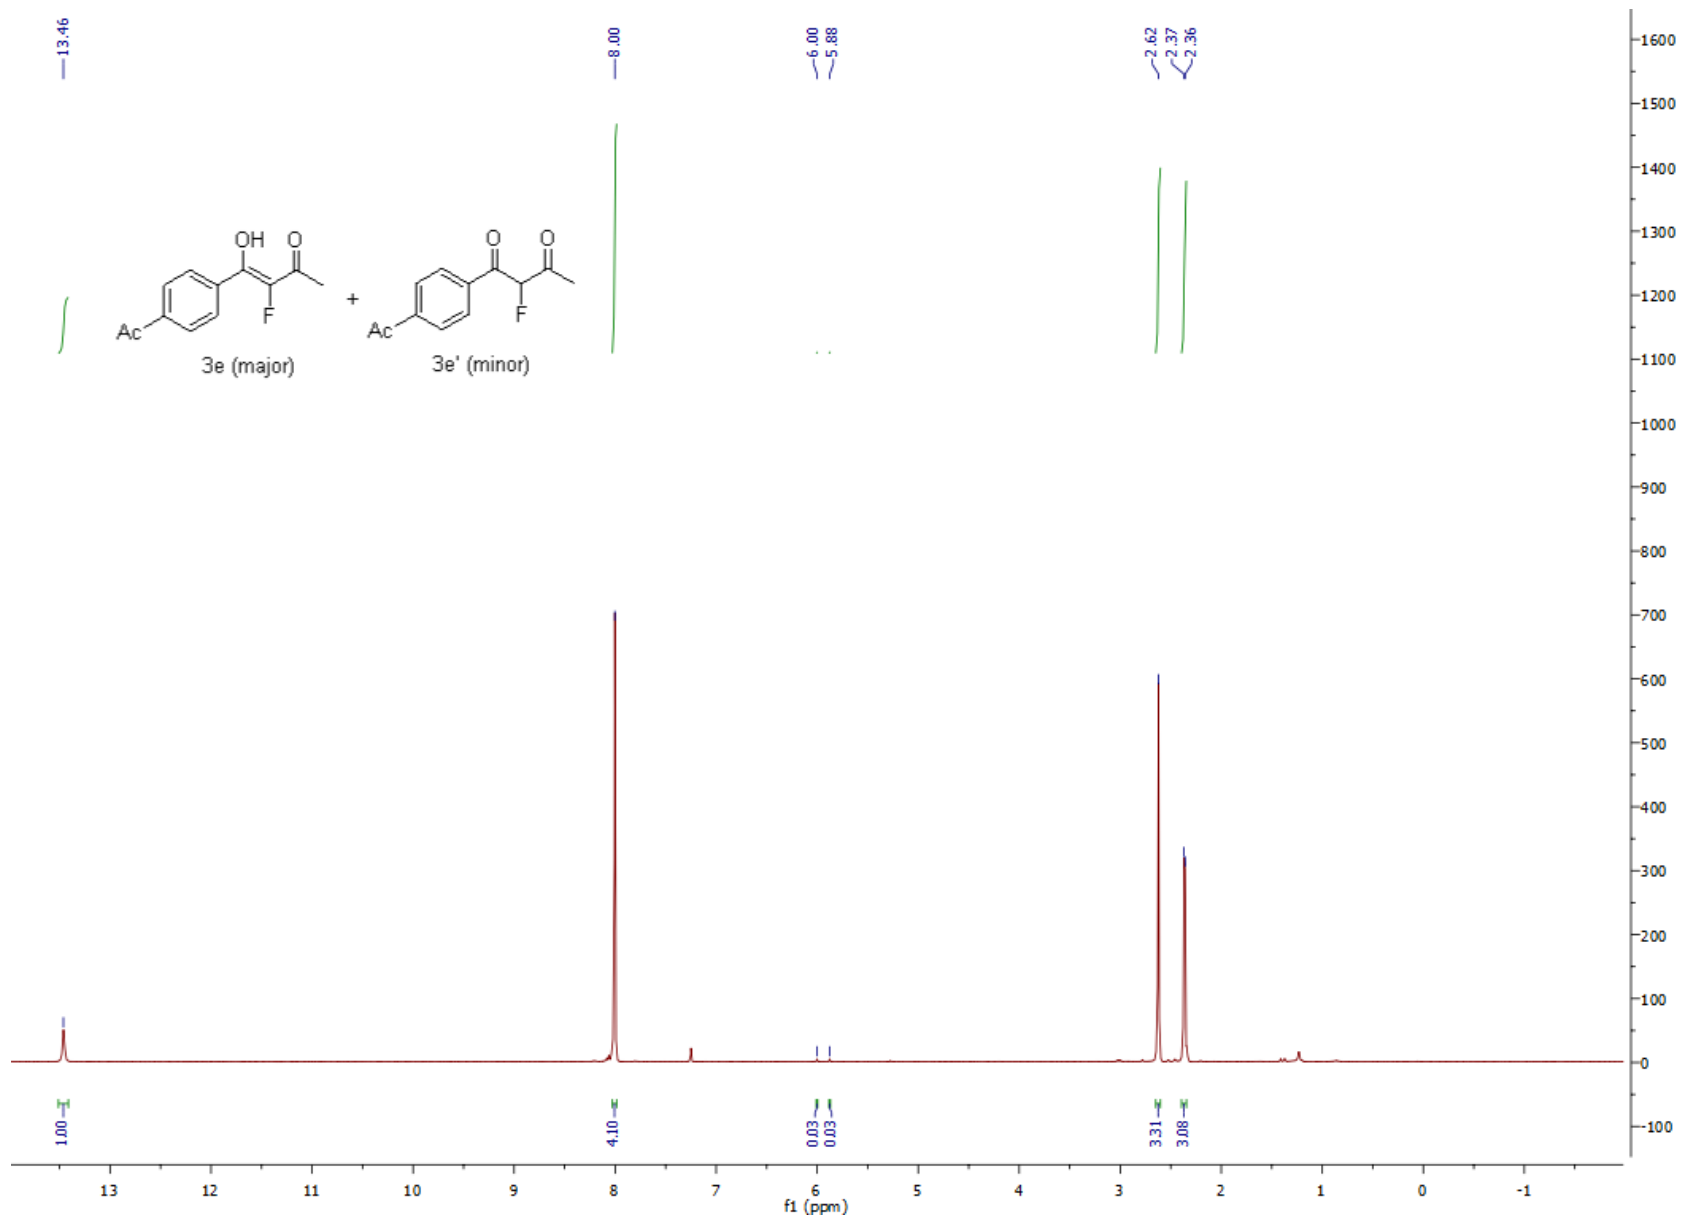



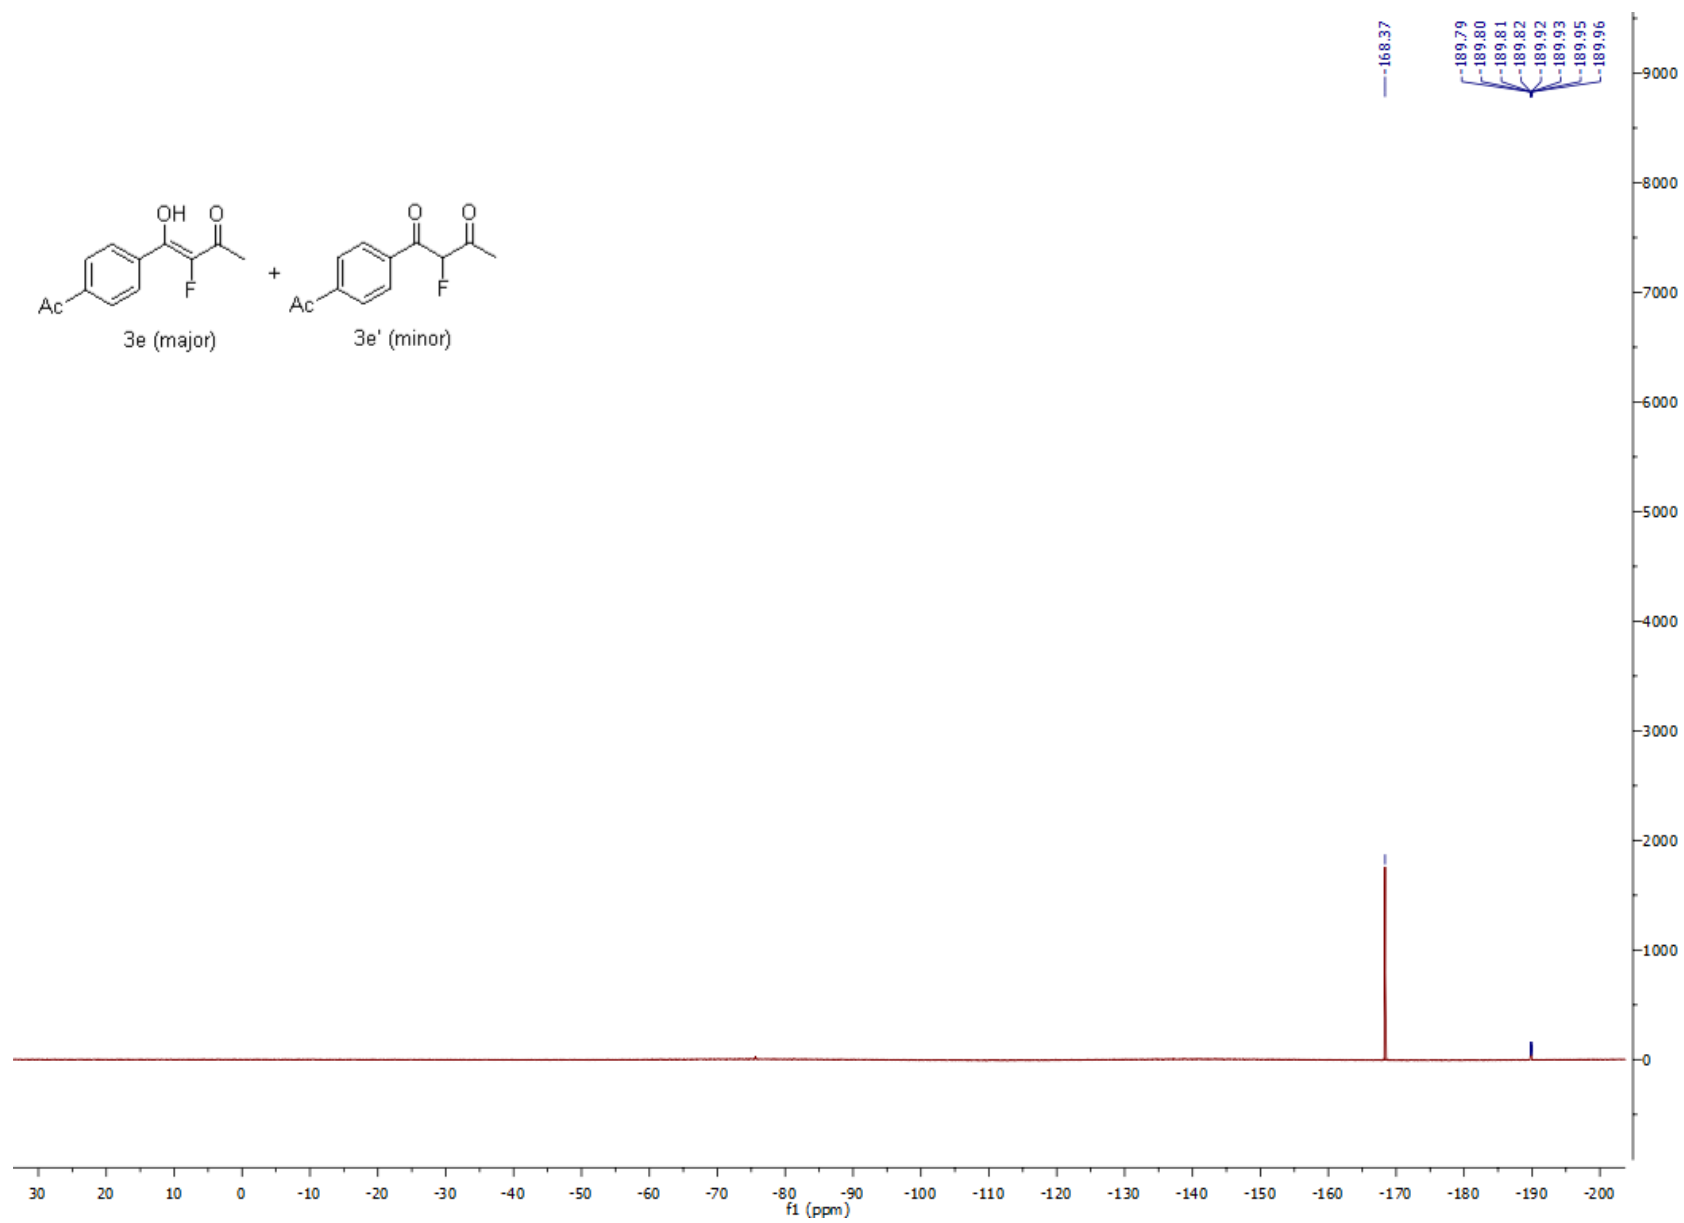

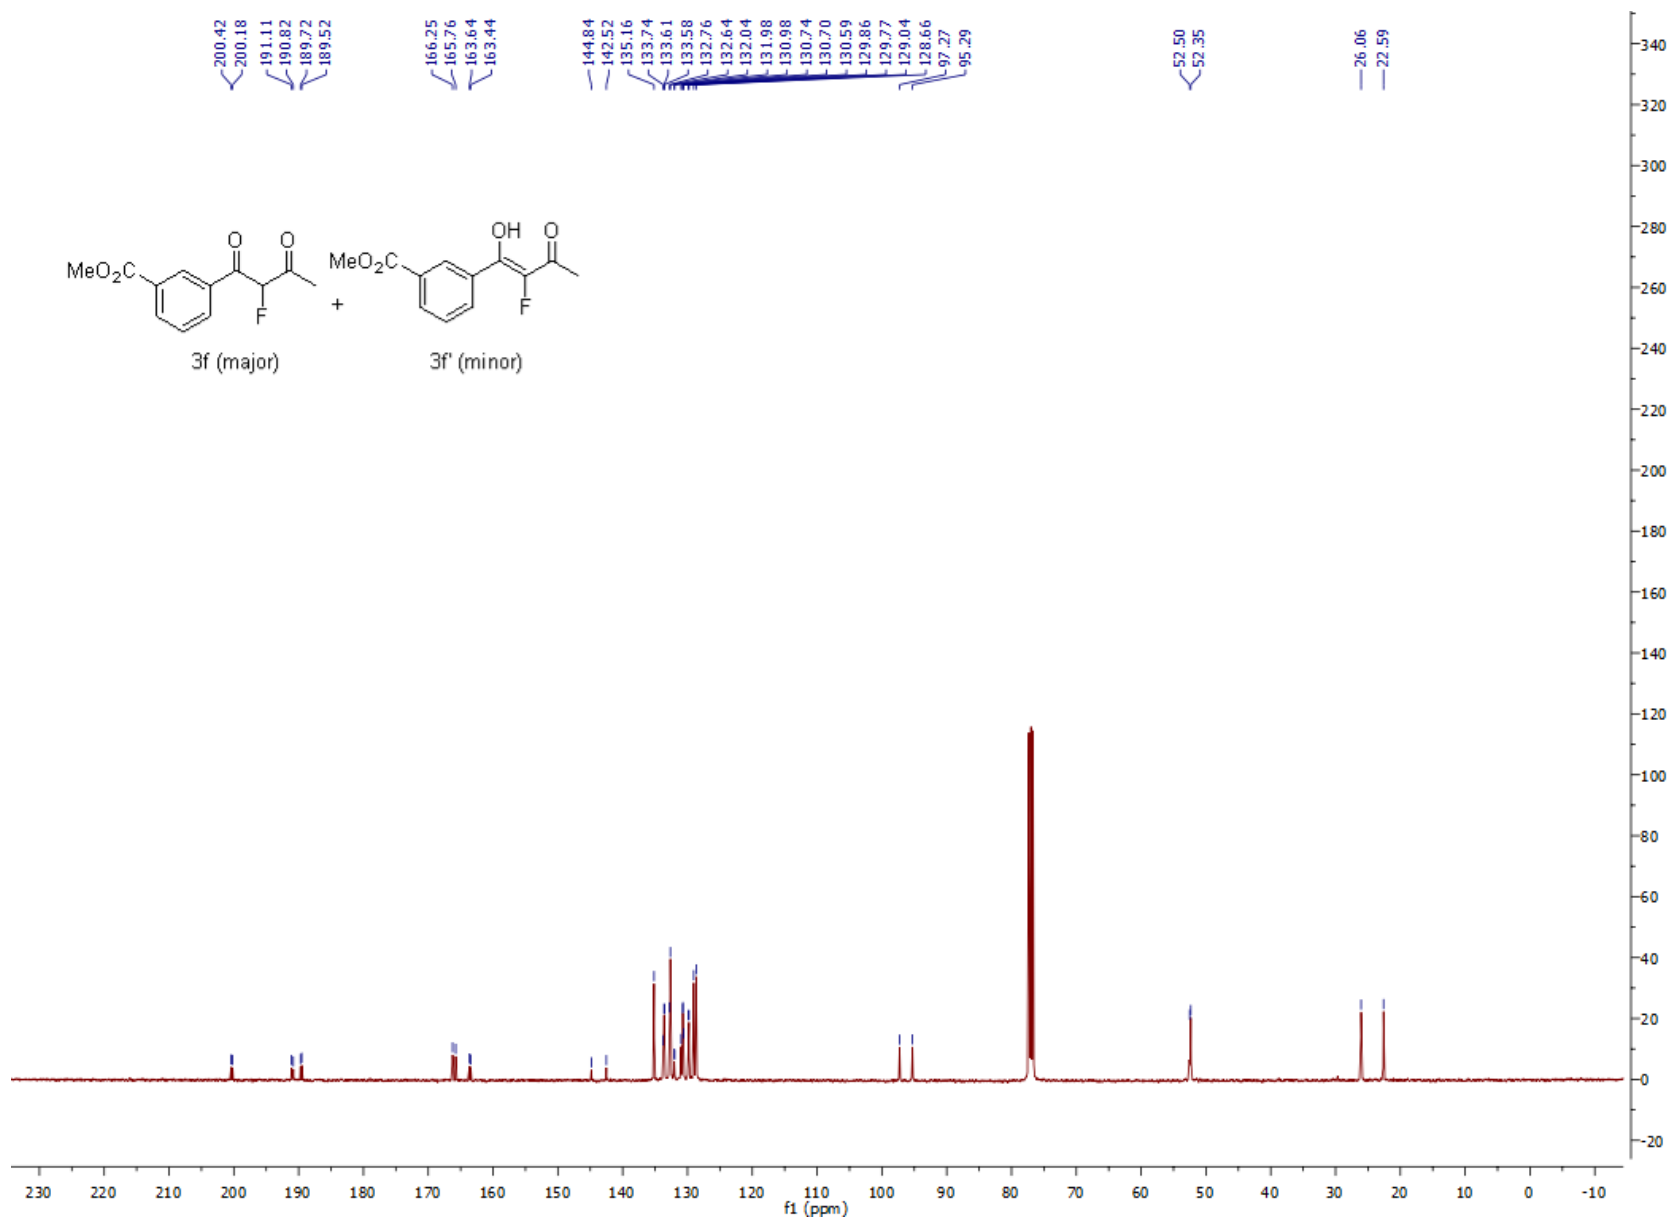

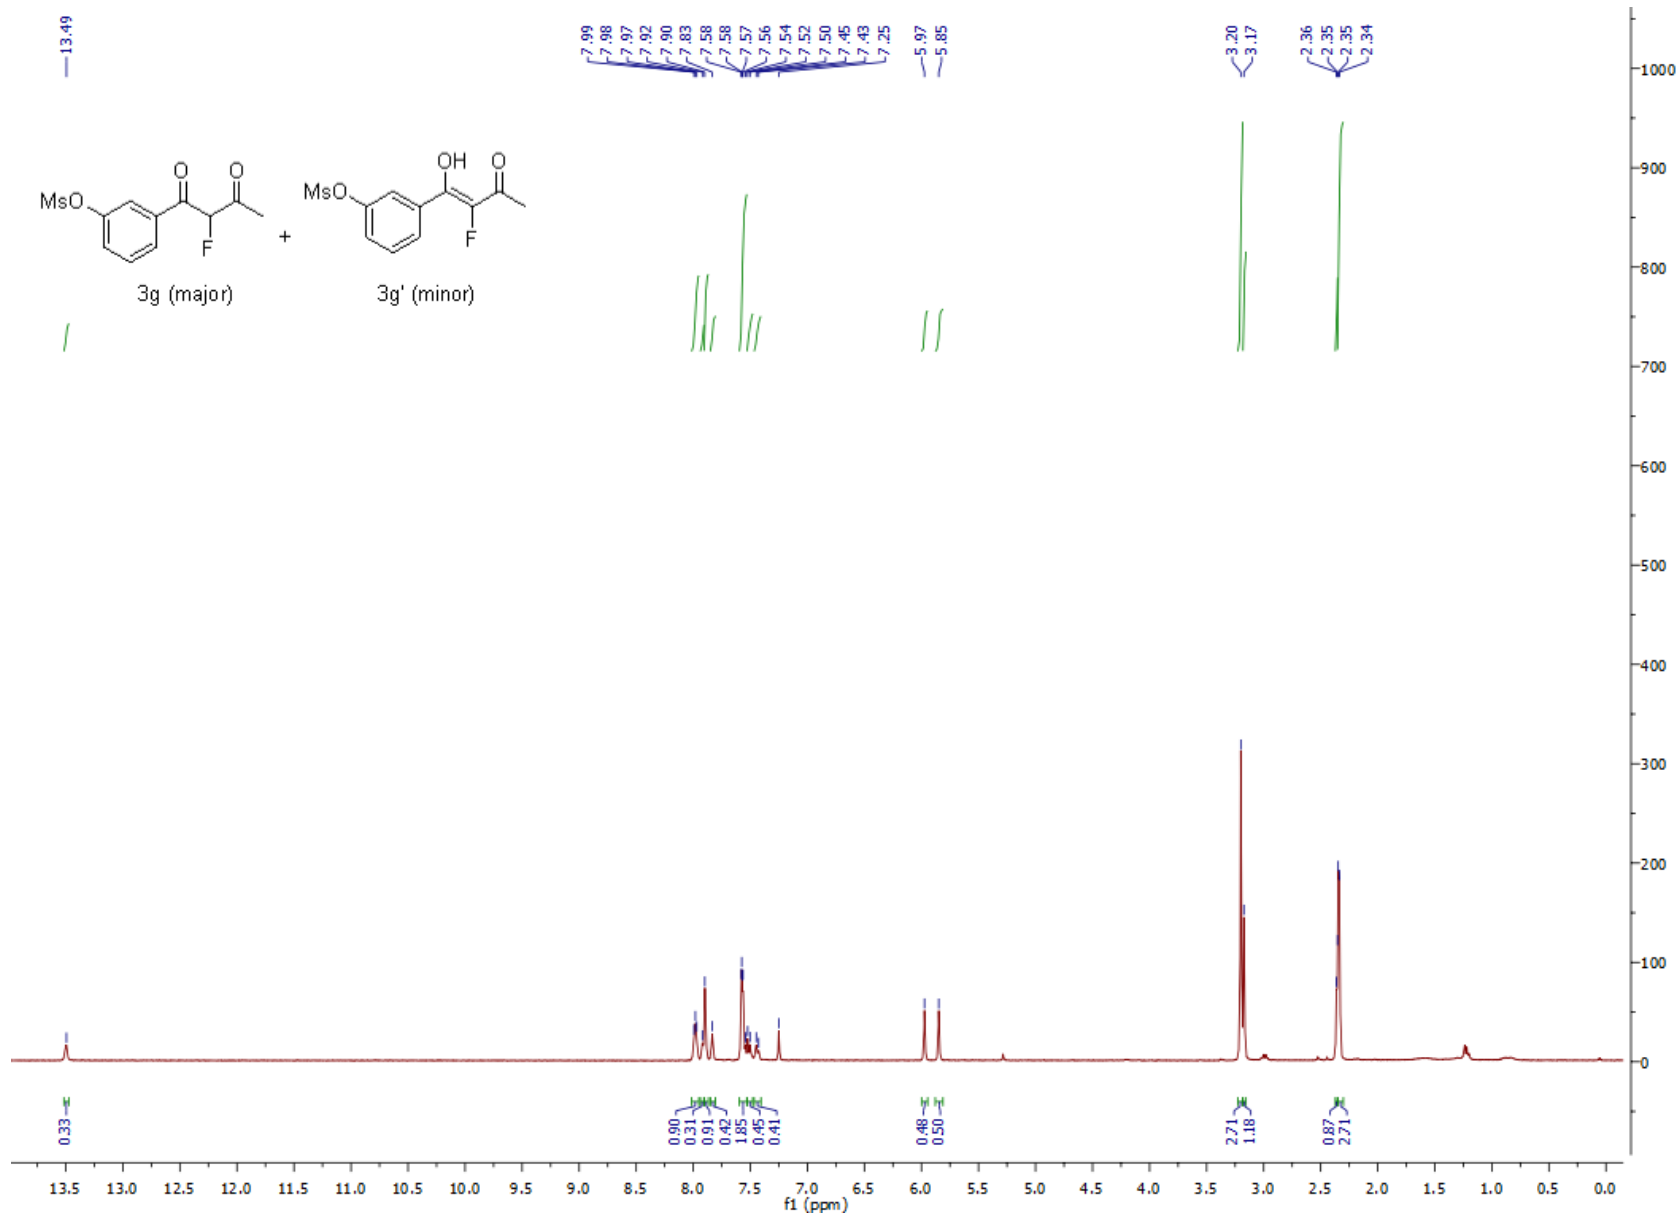

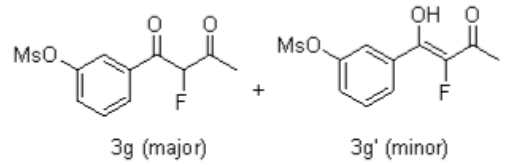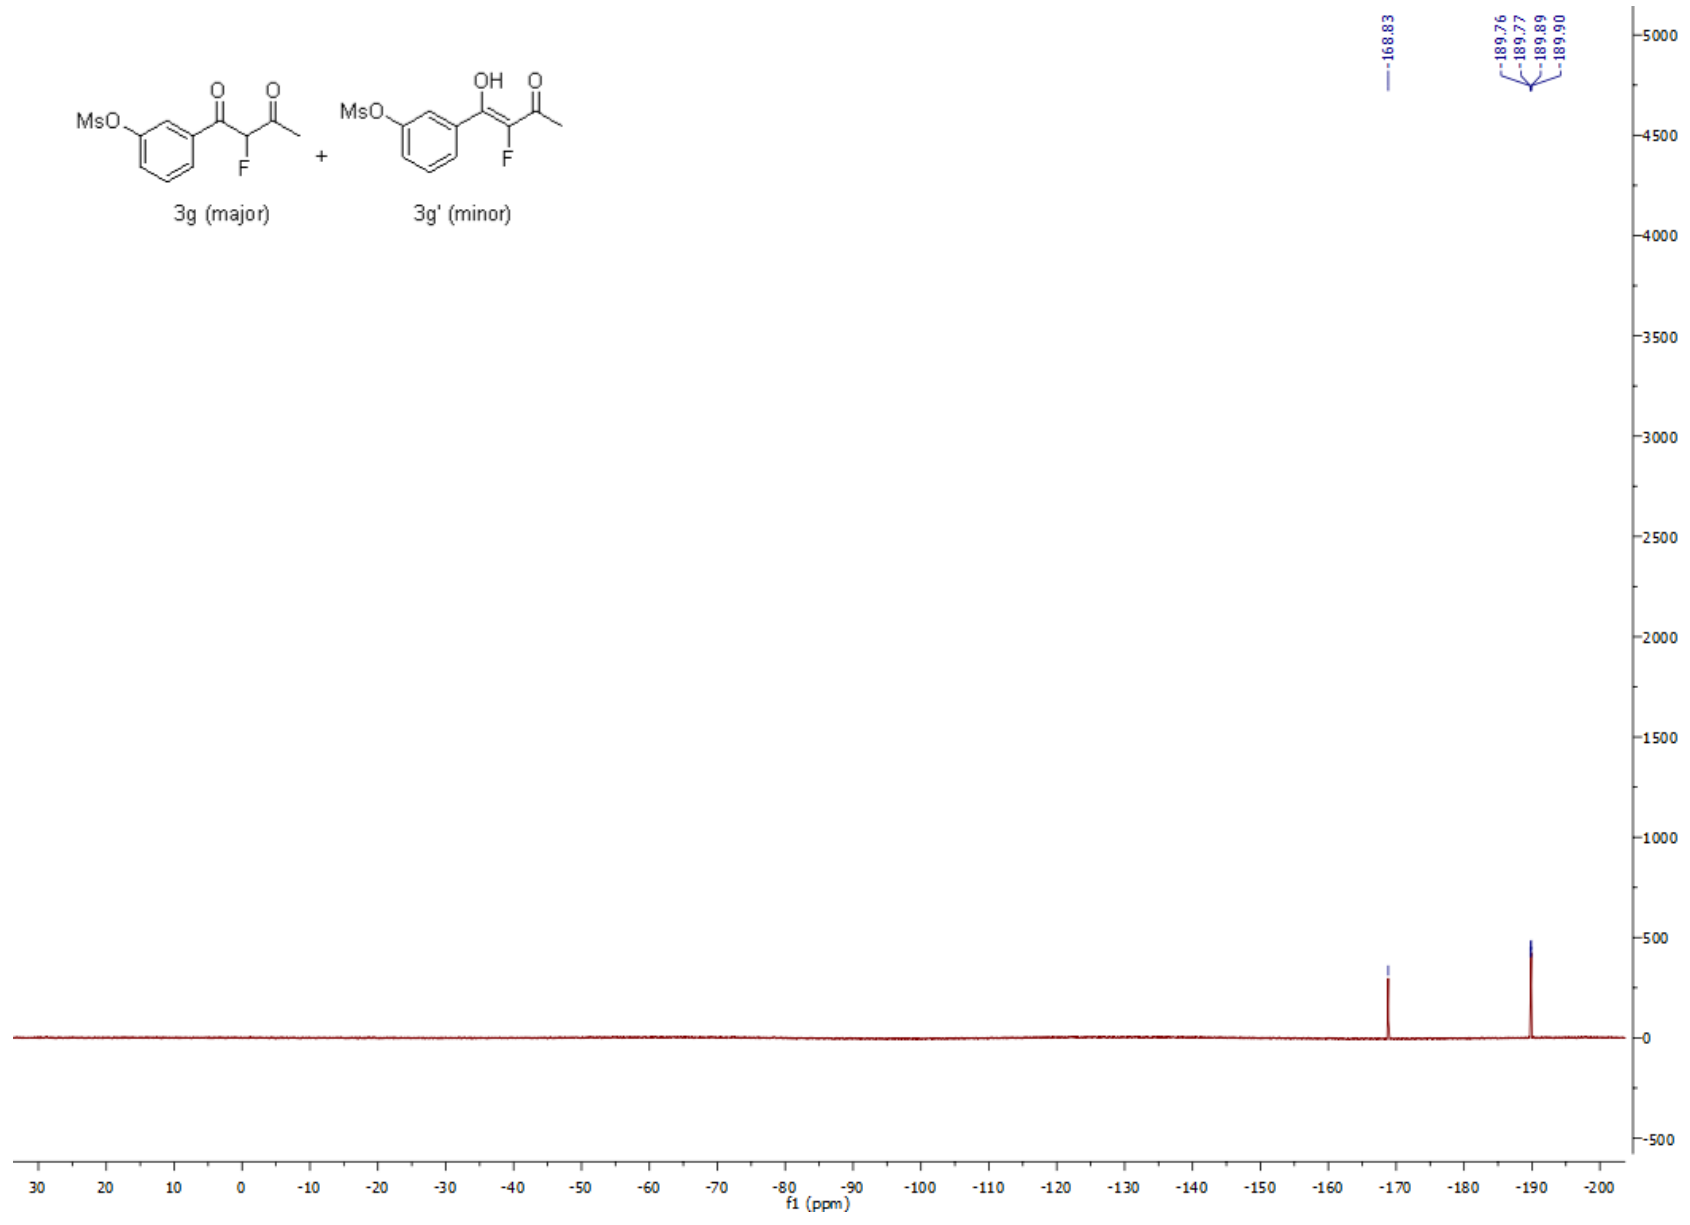

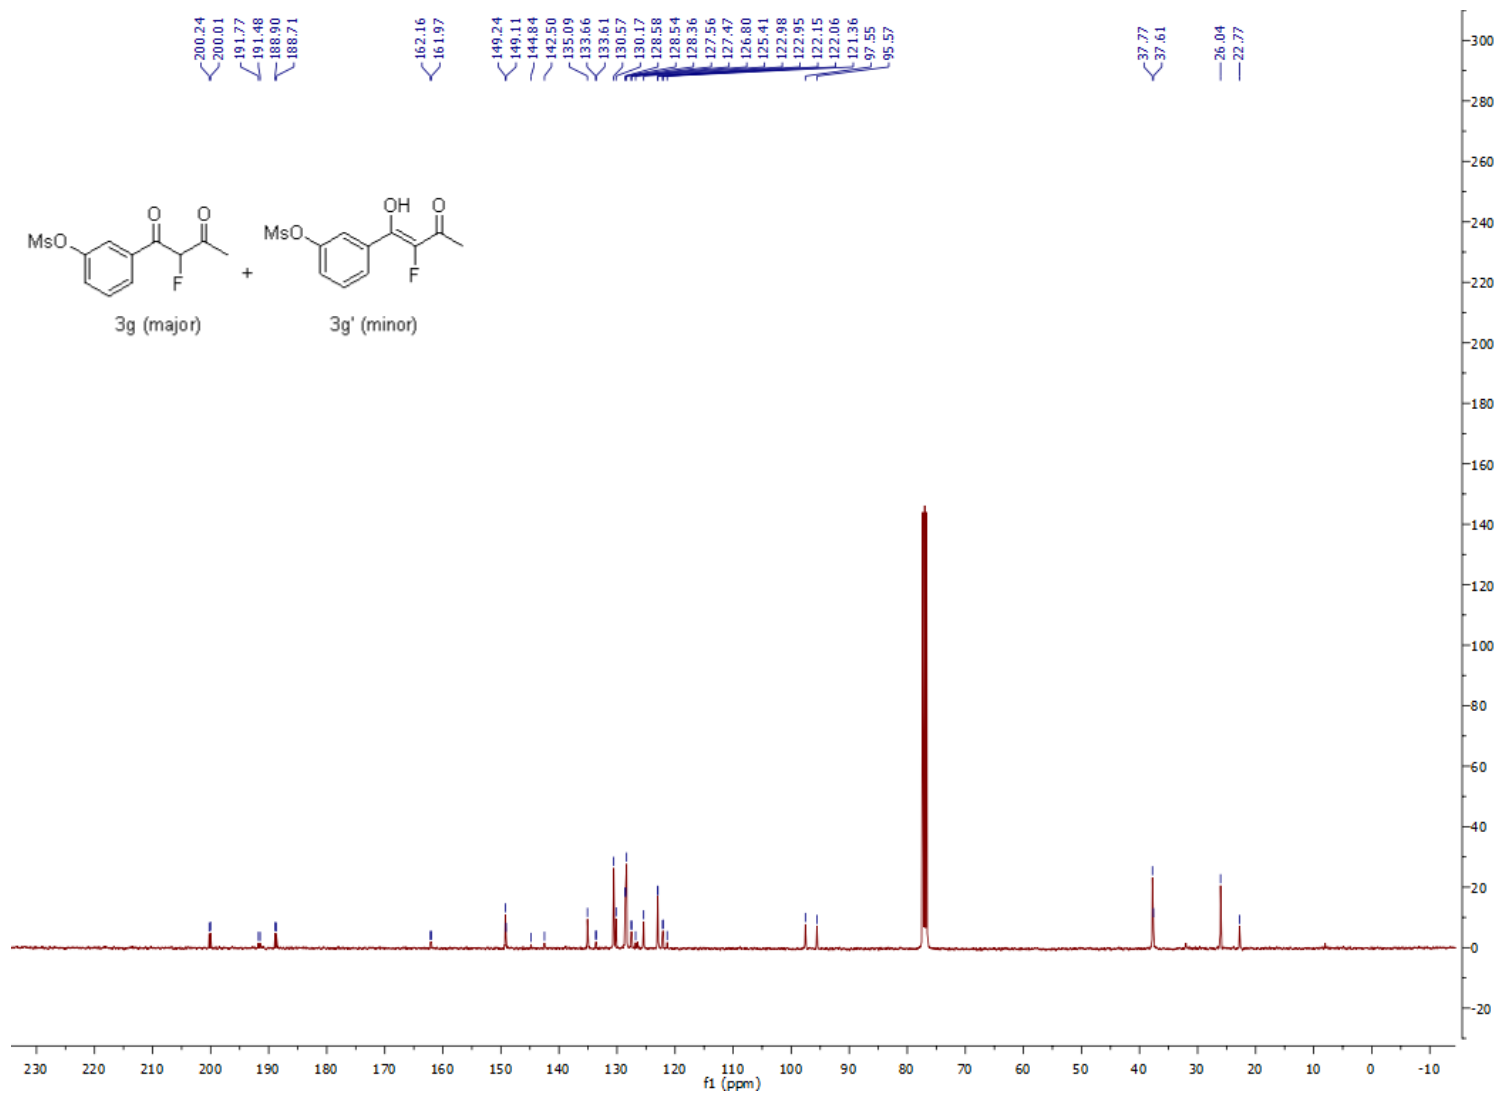

PROTON\_01

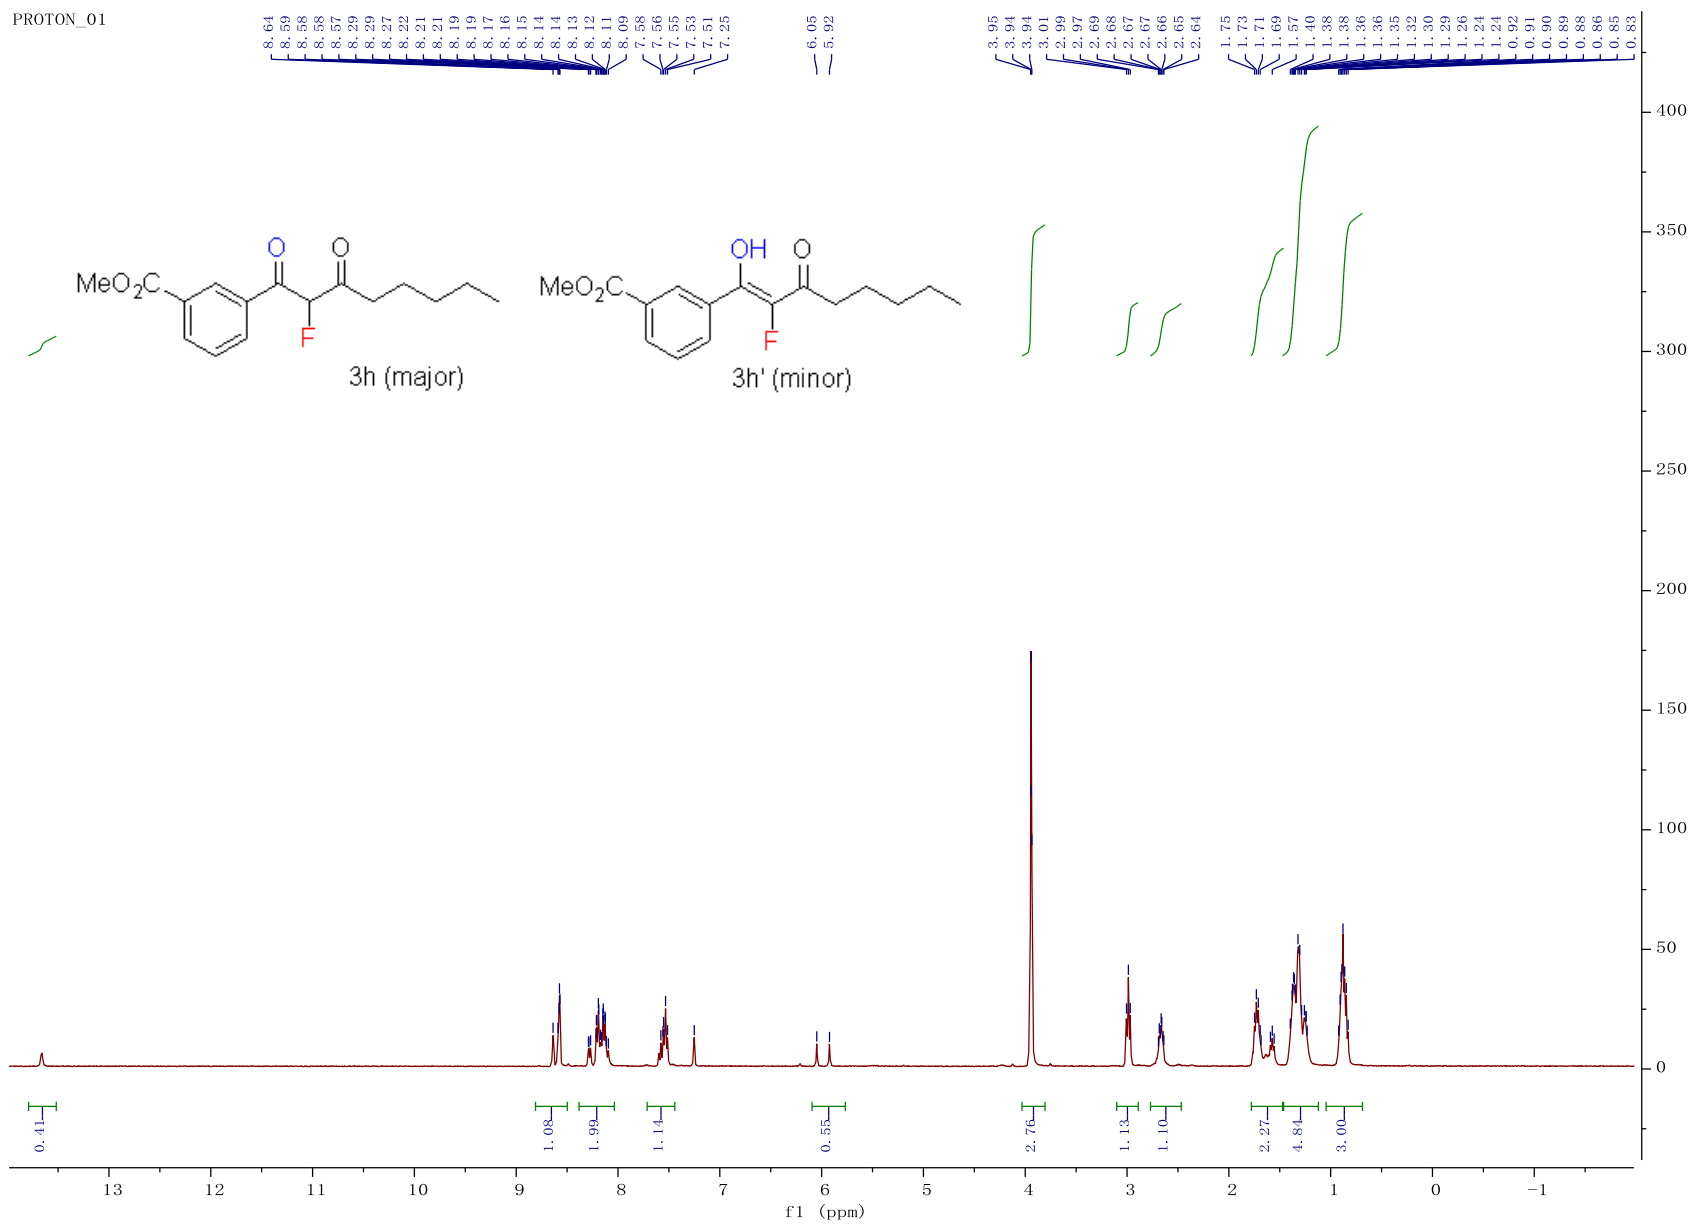

FLUORINE\_01

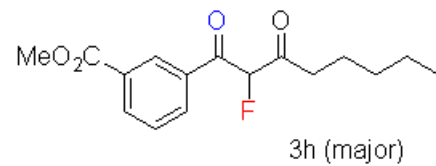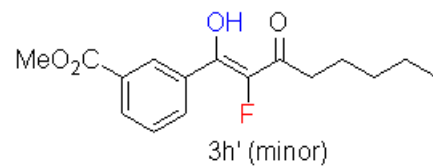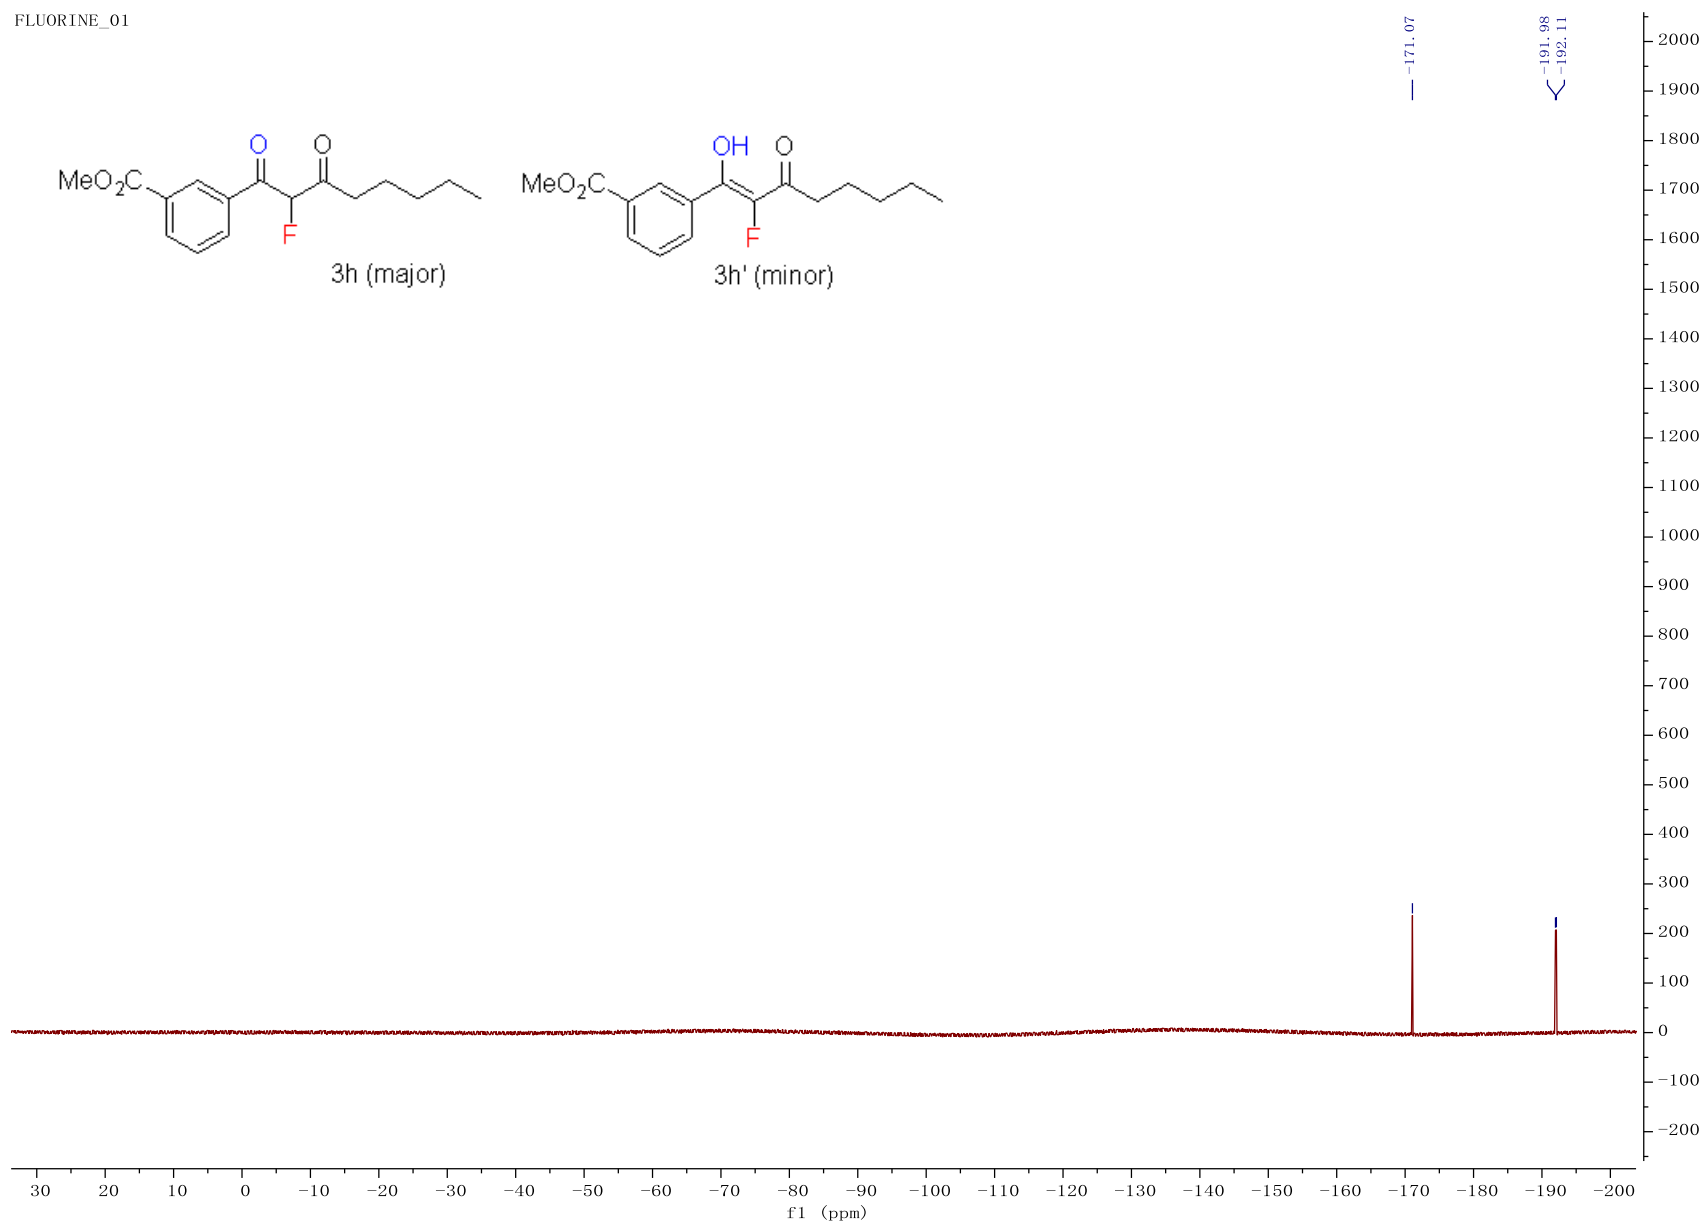

CARBON\_01

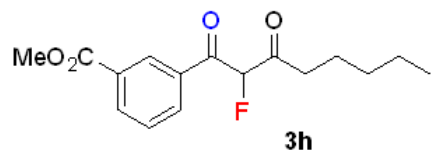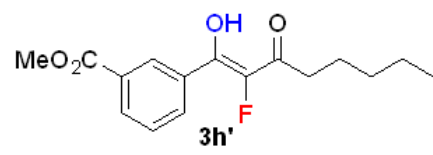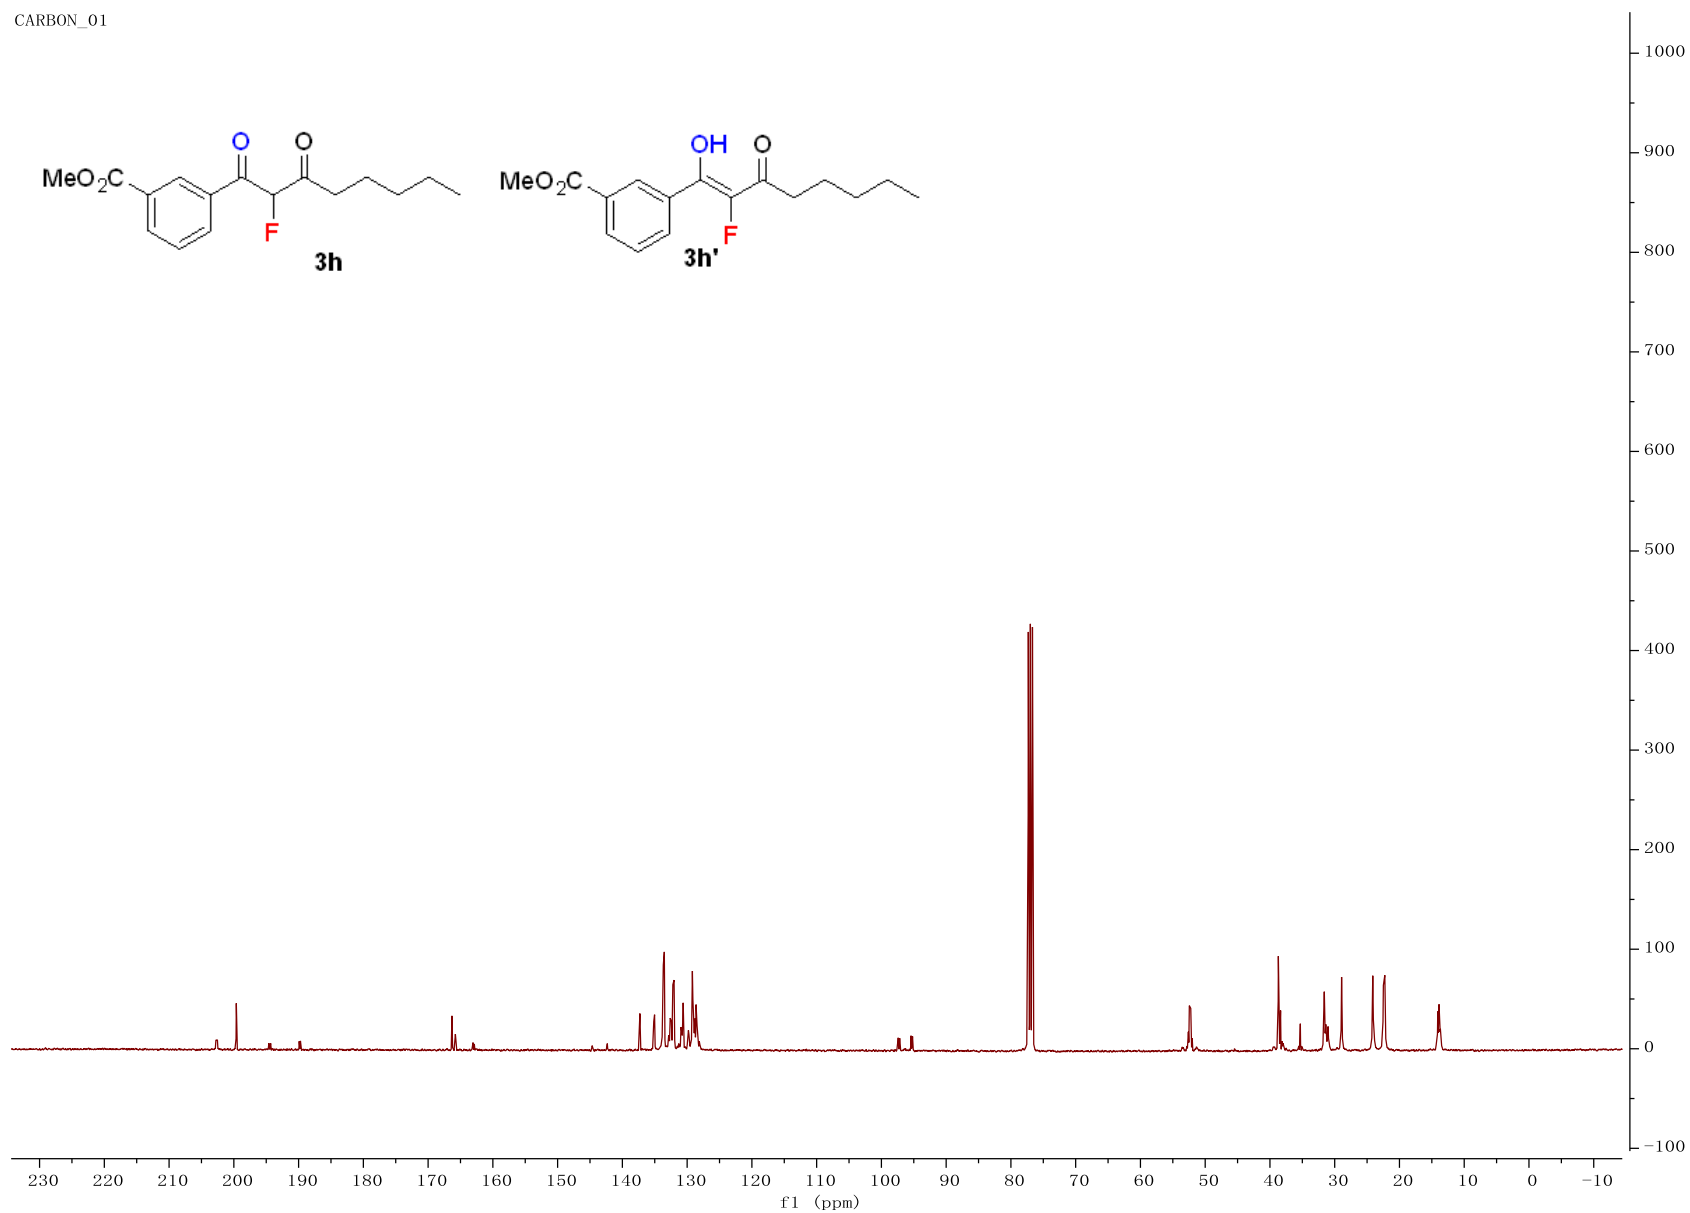



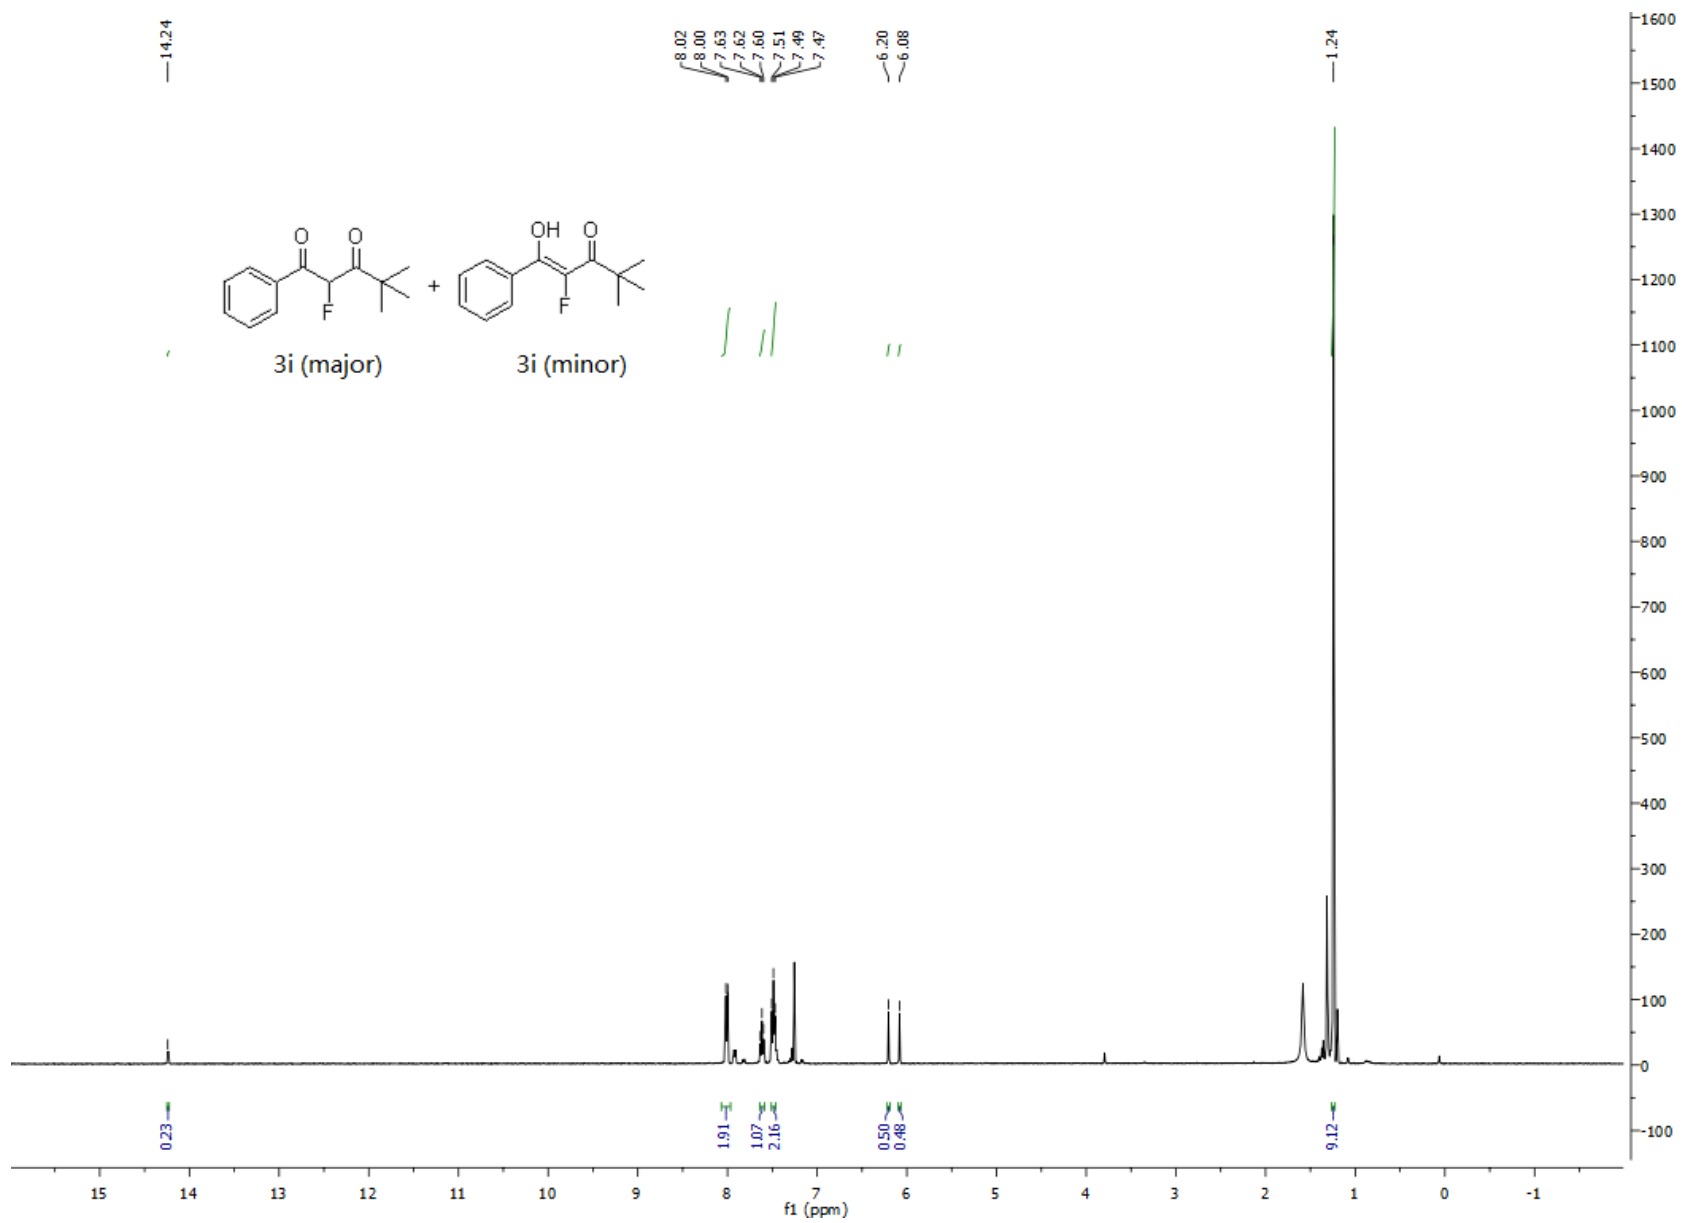

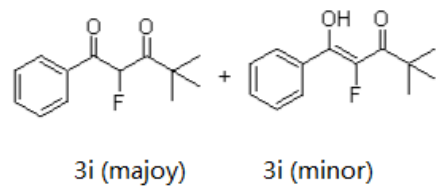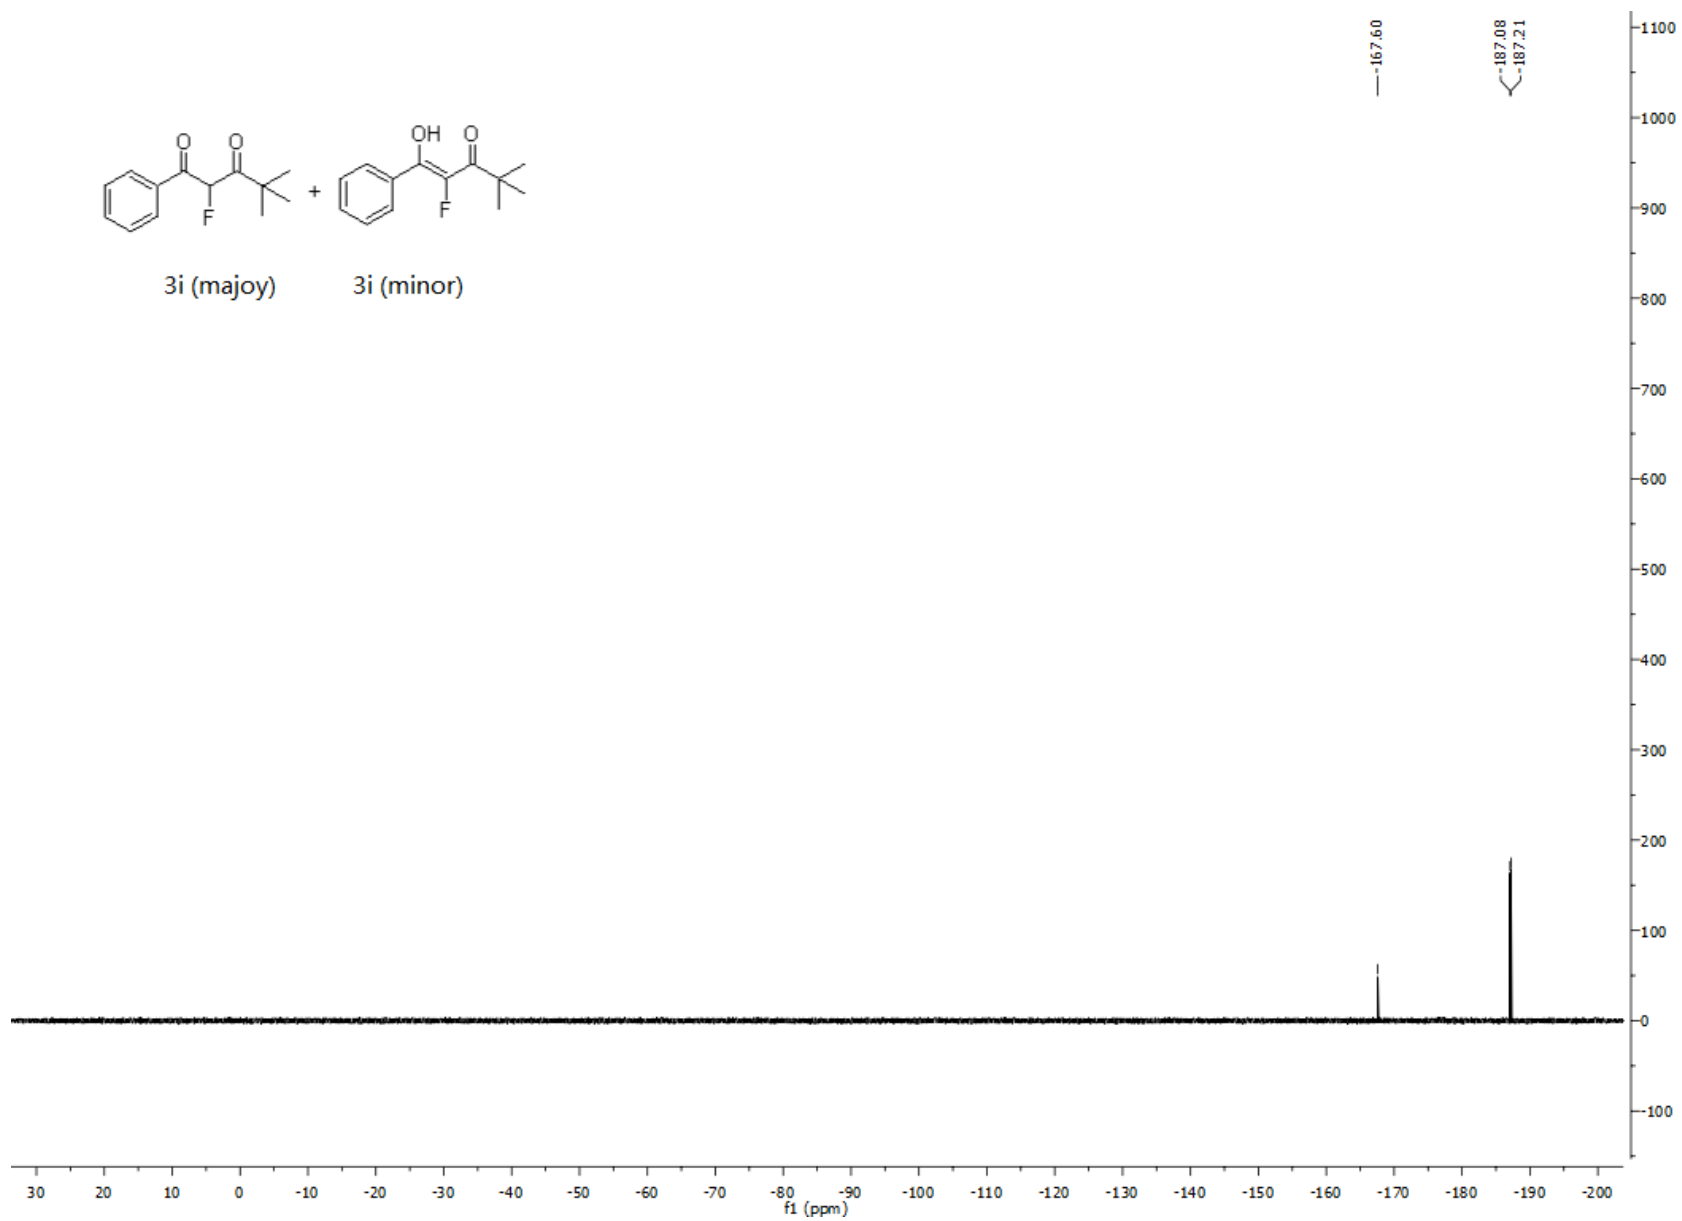

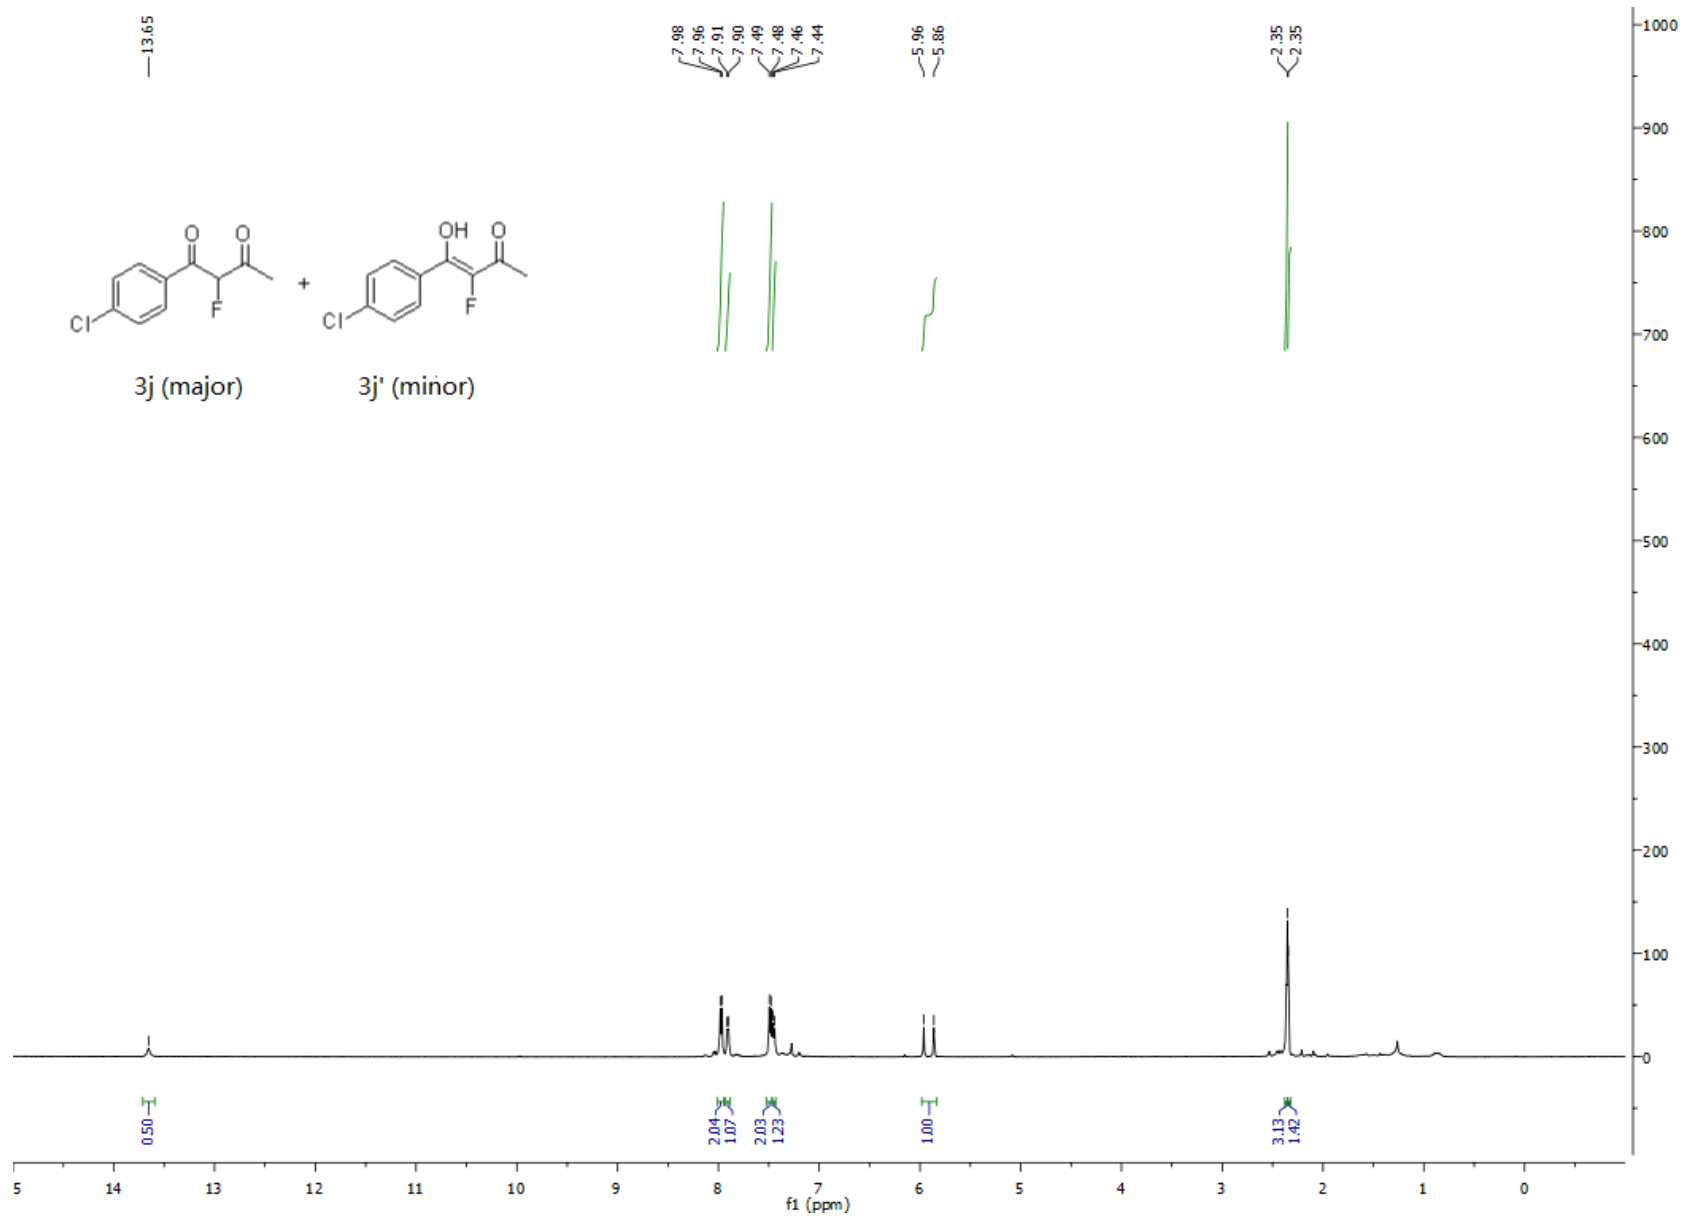

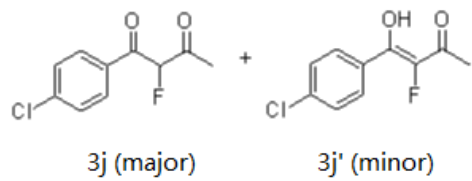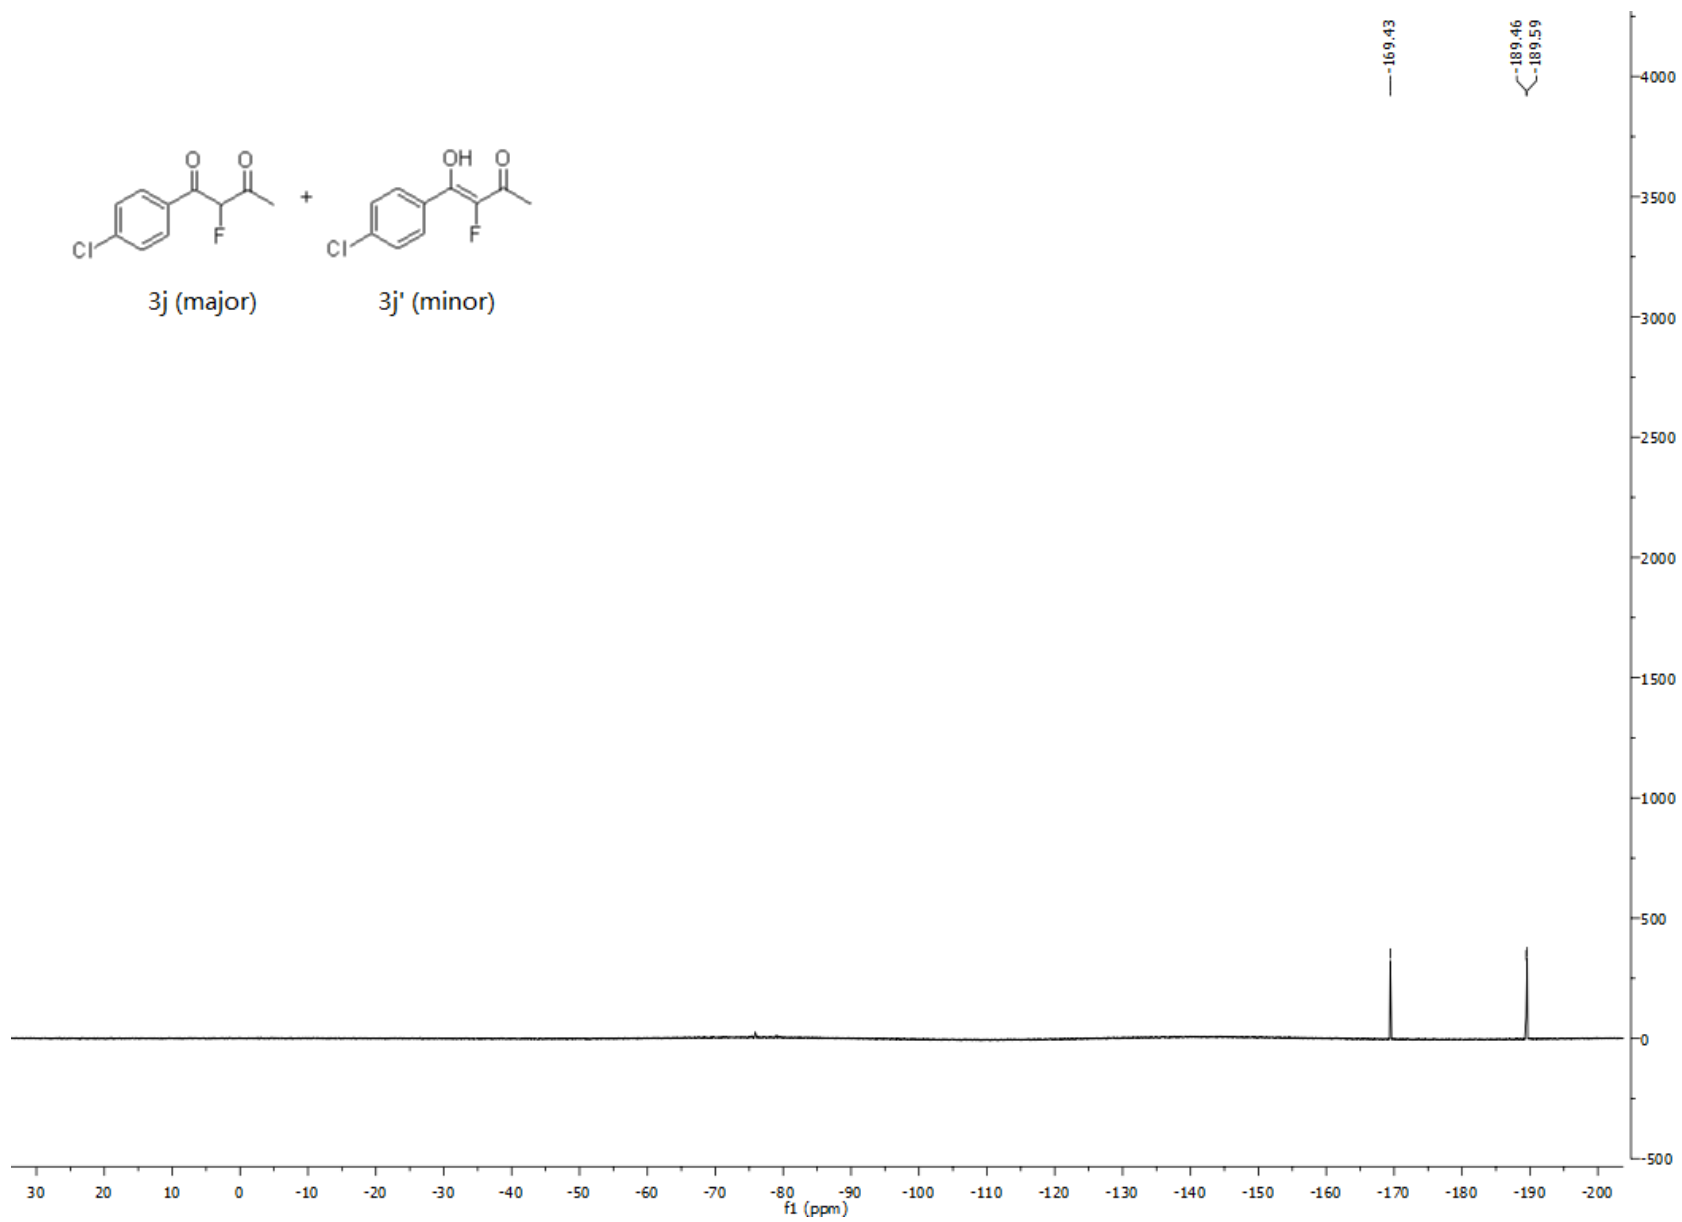

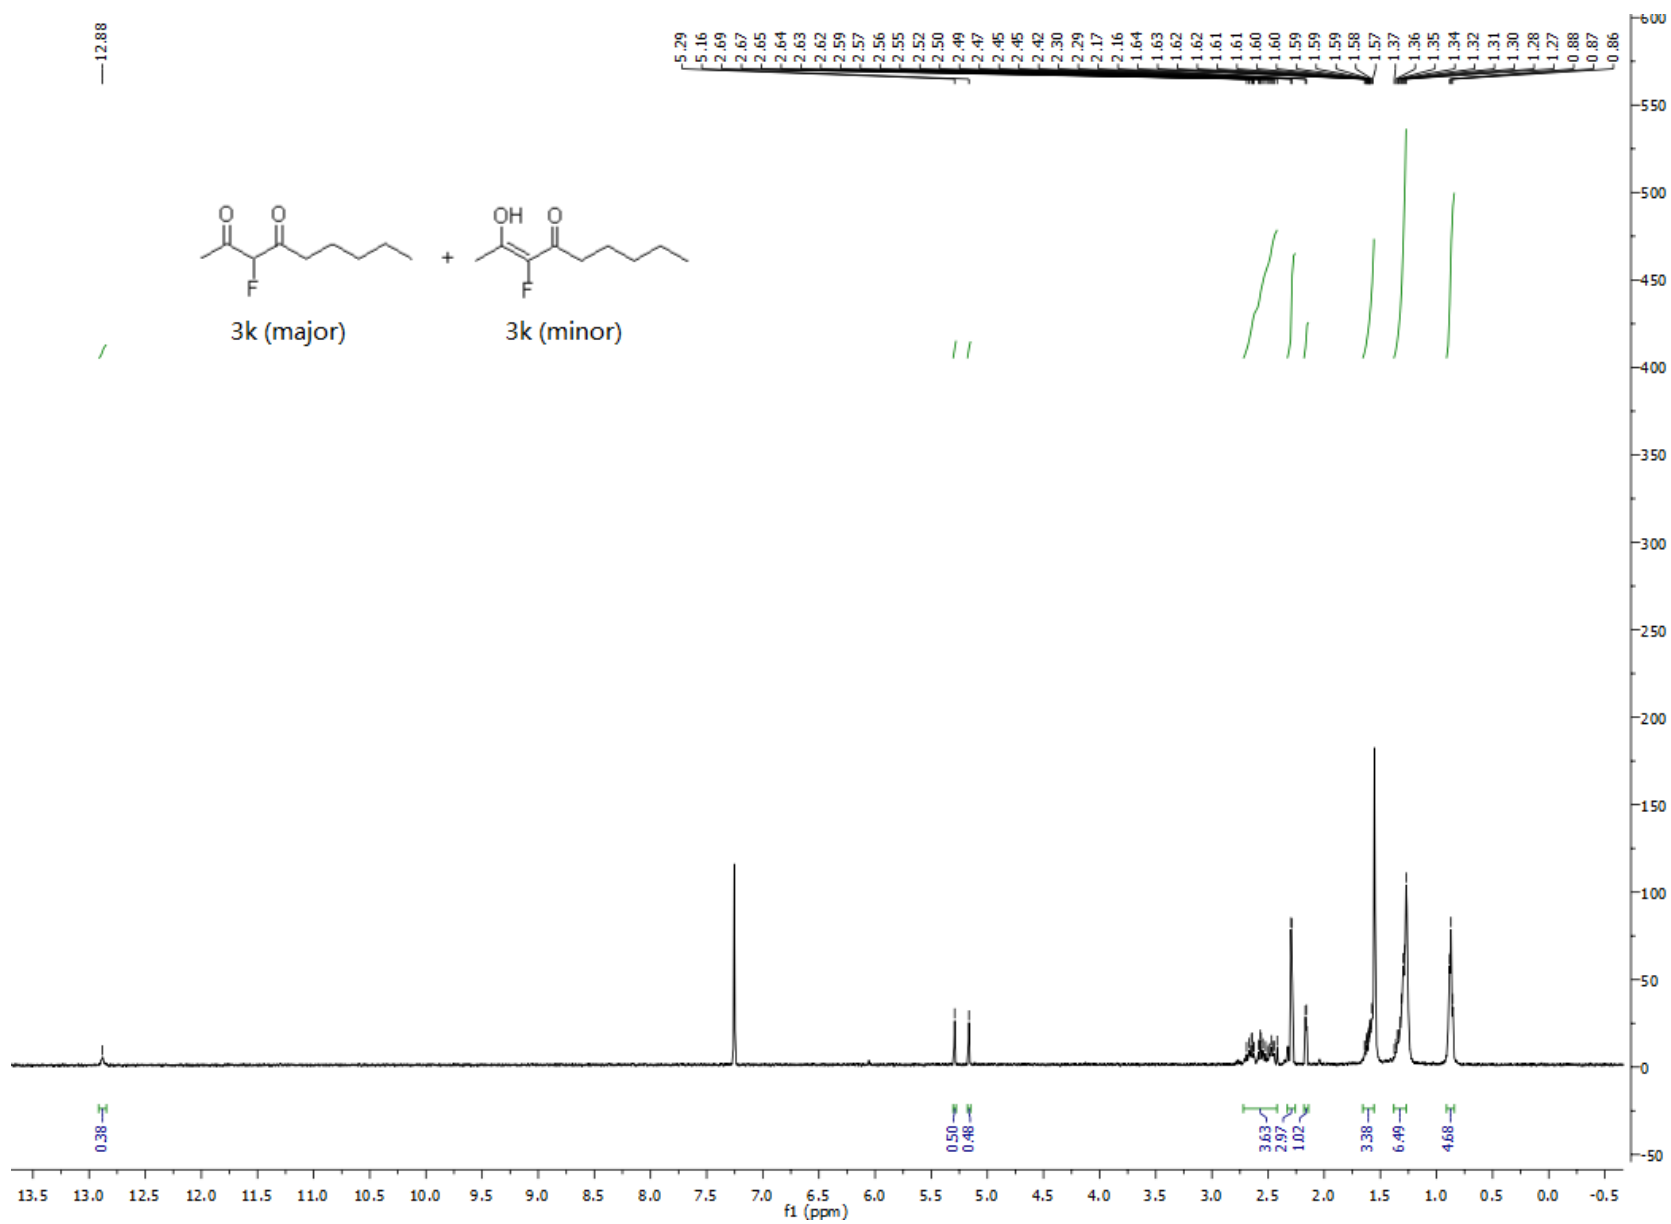

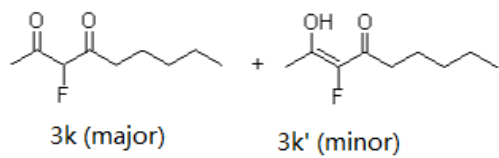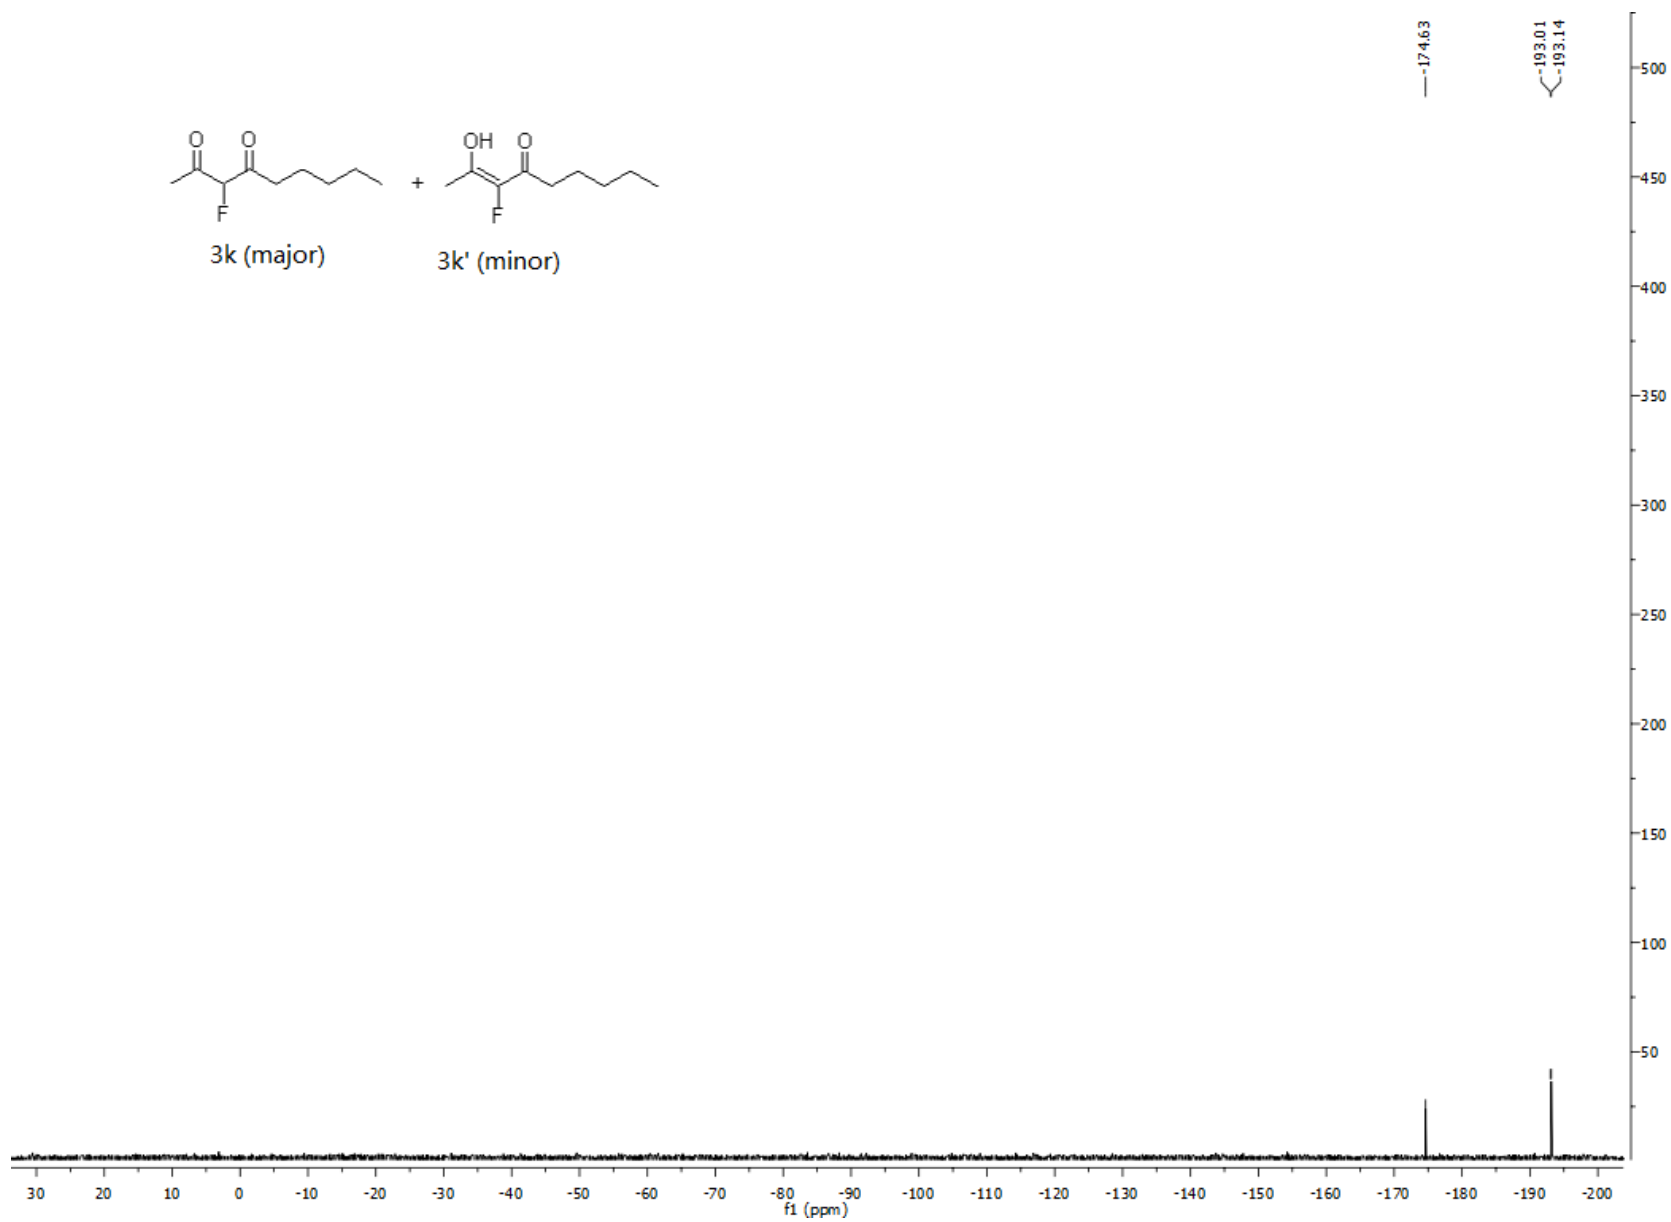

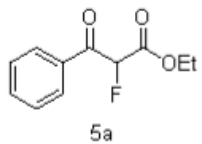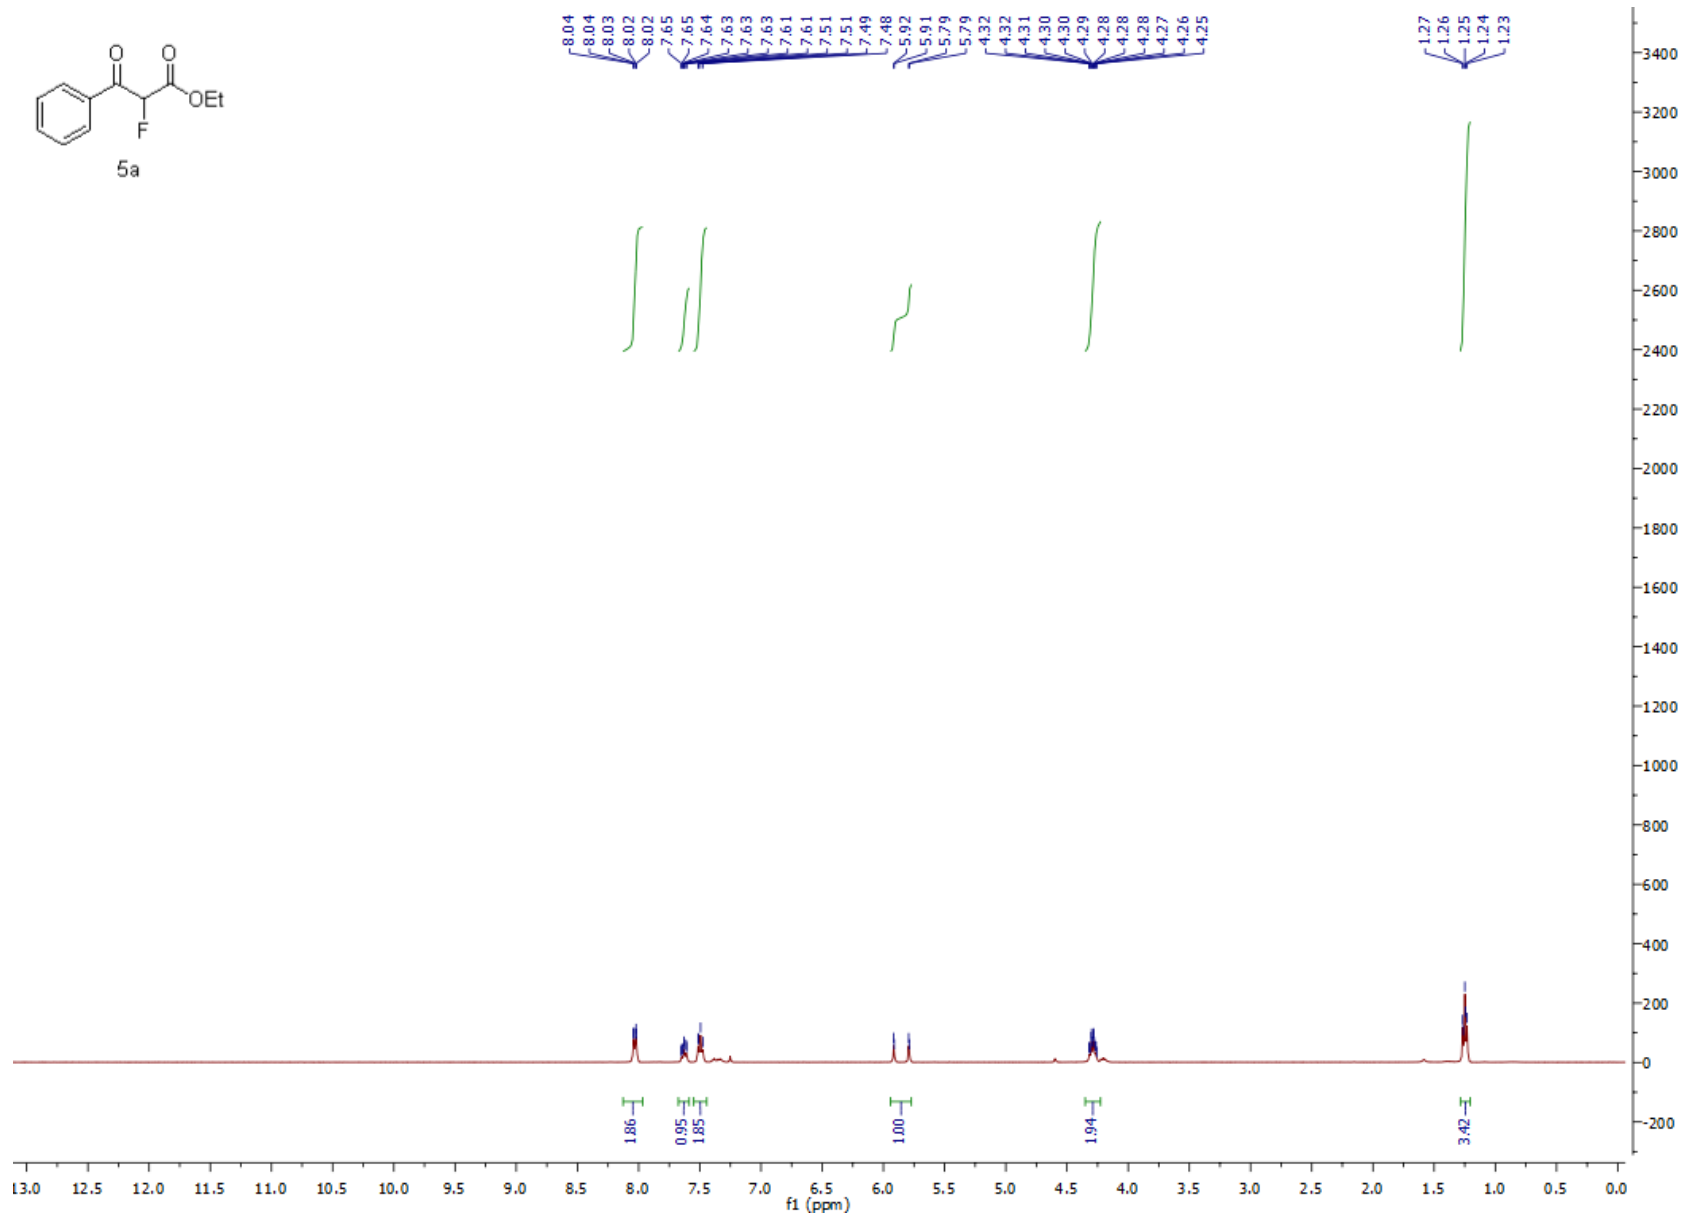

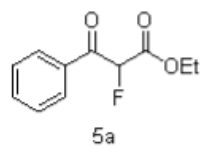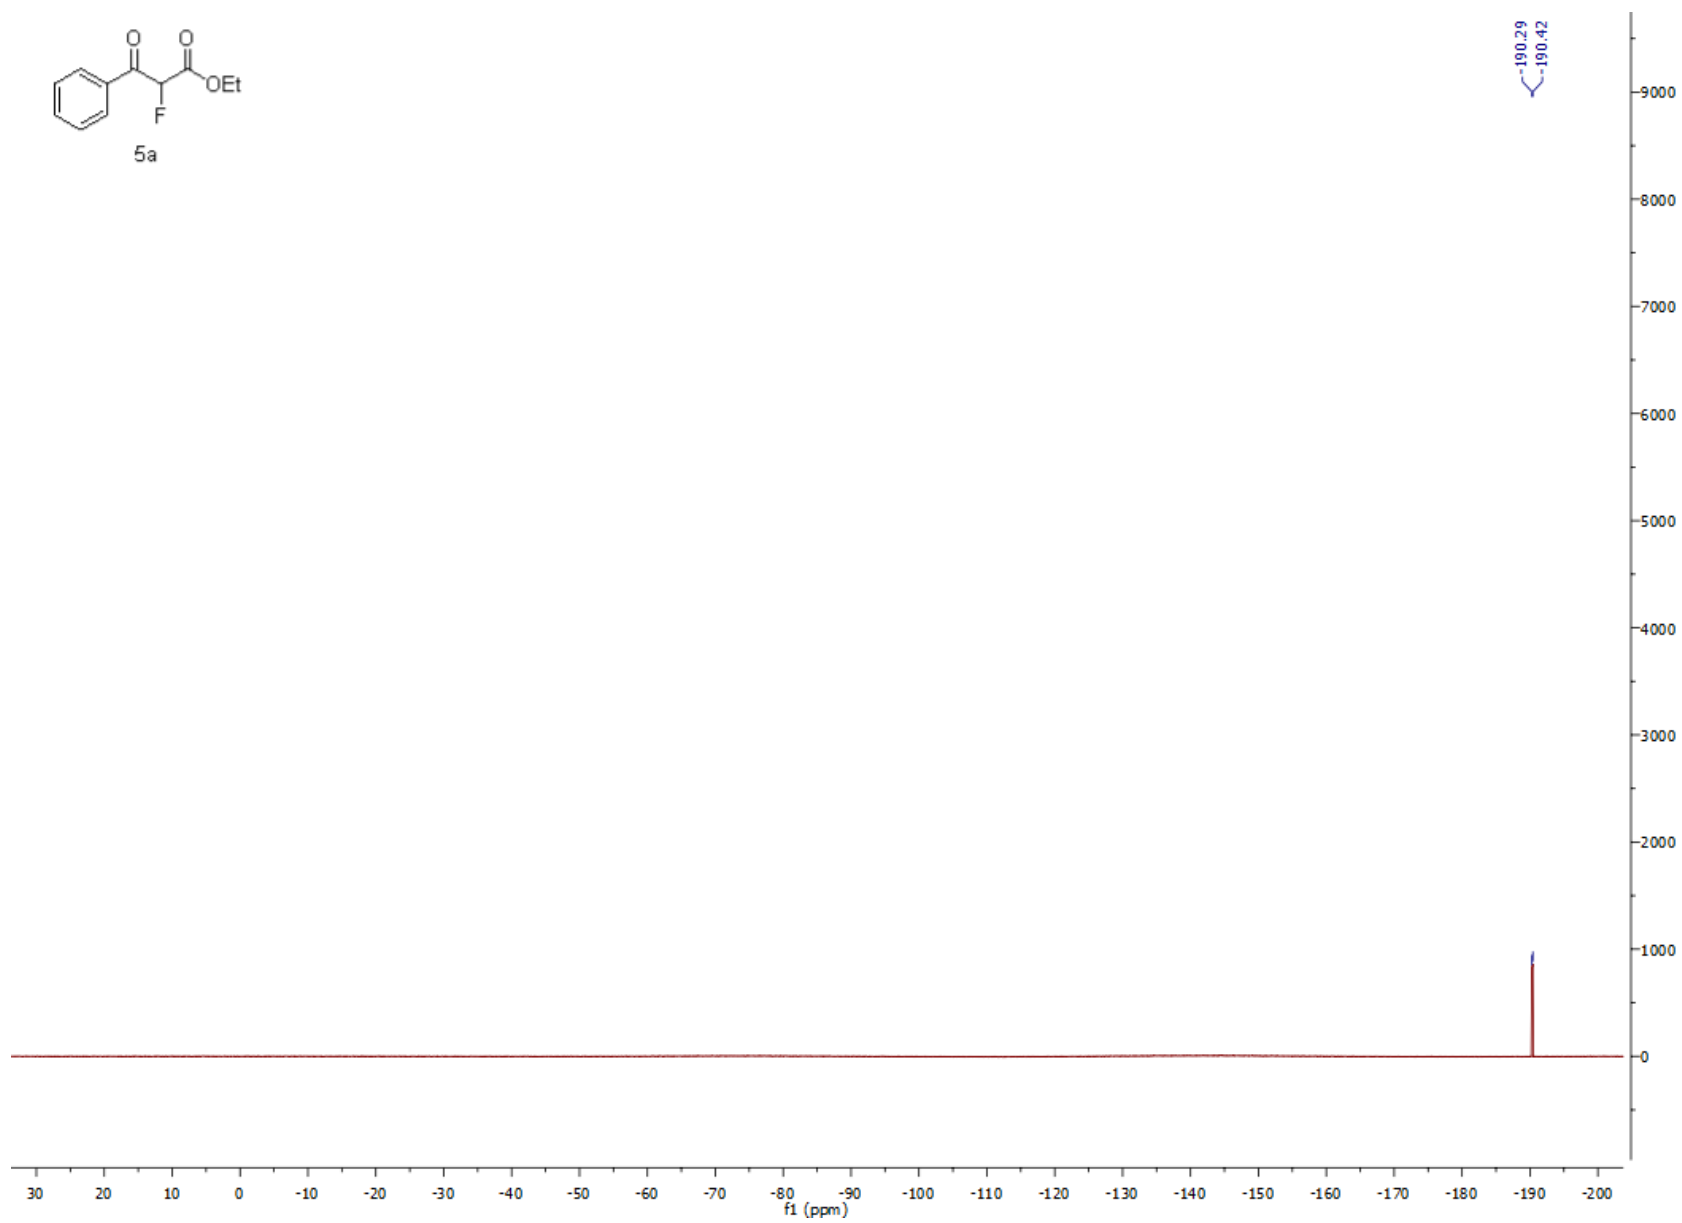



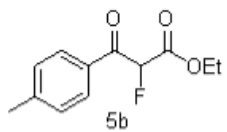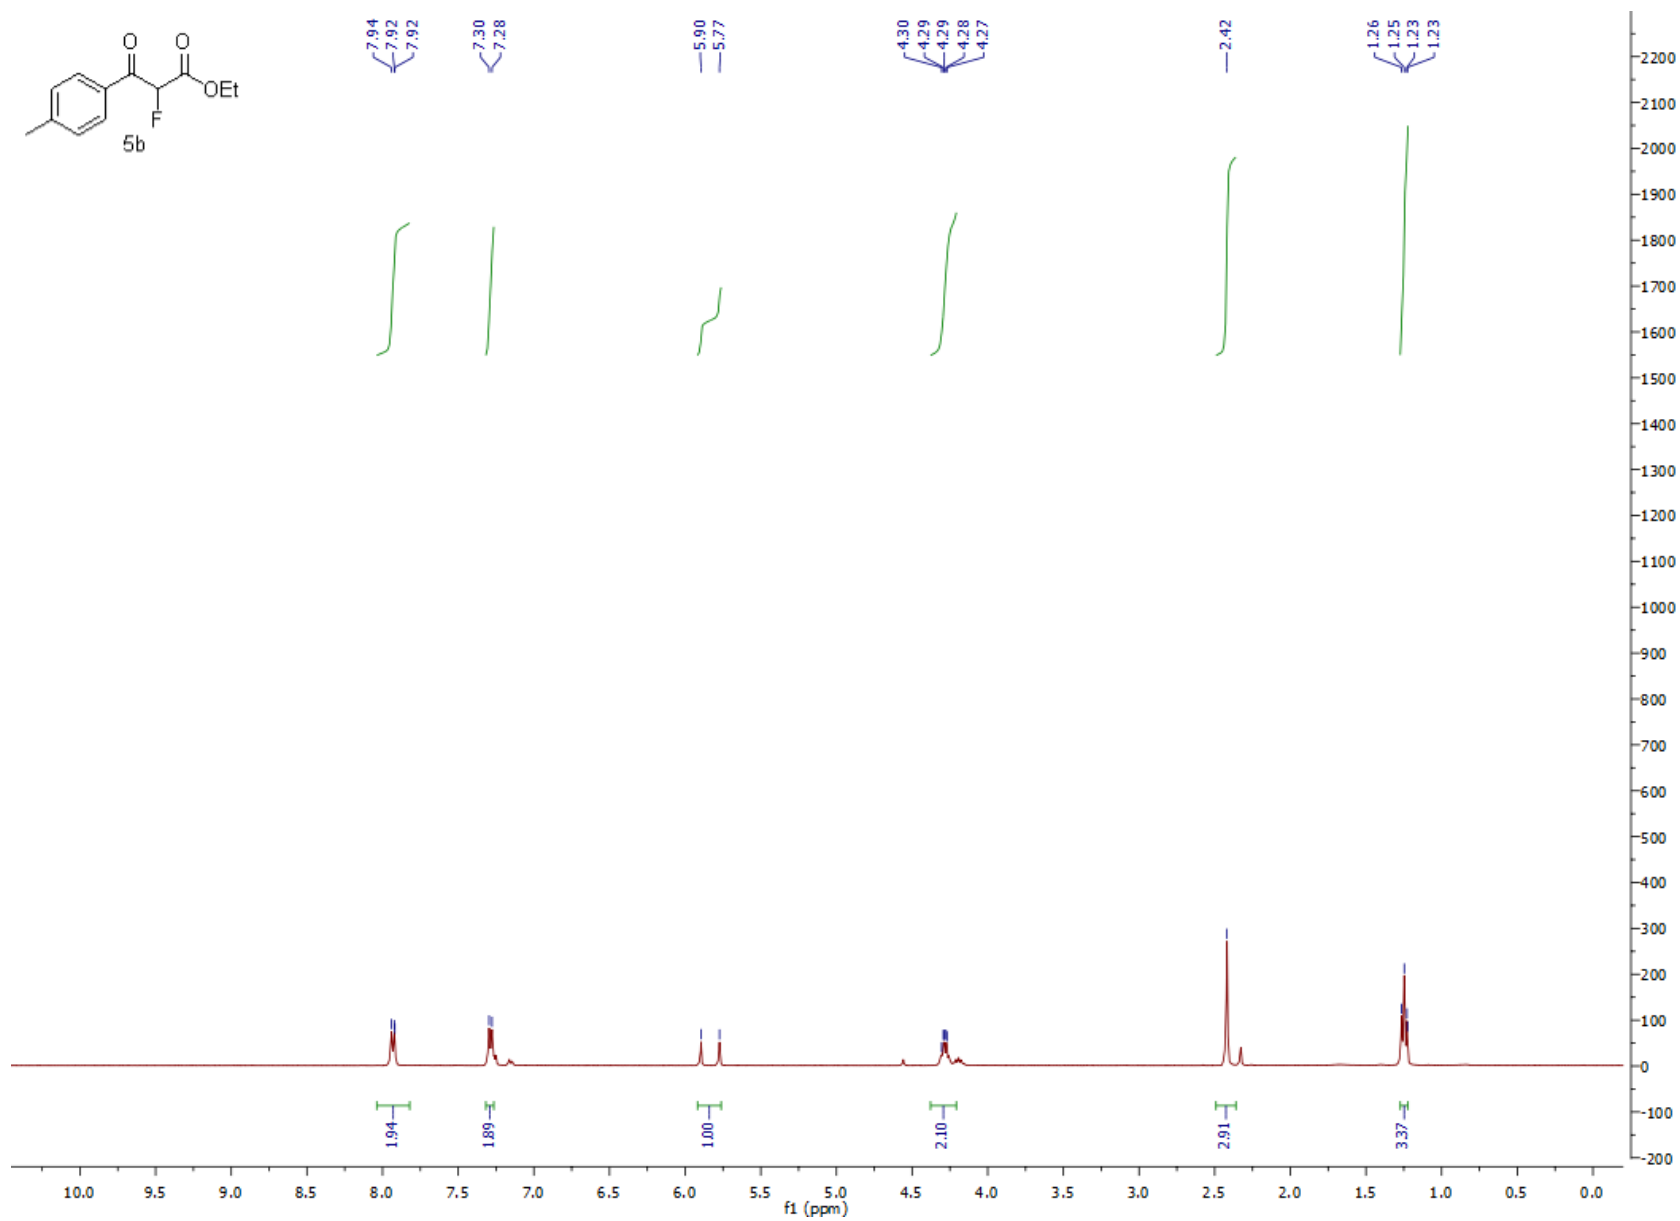

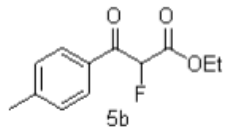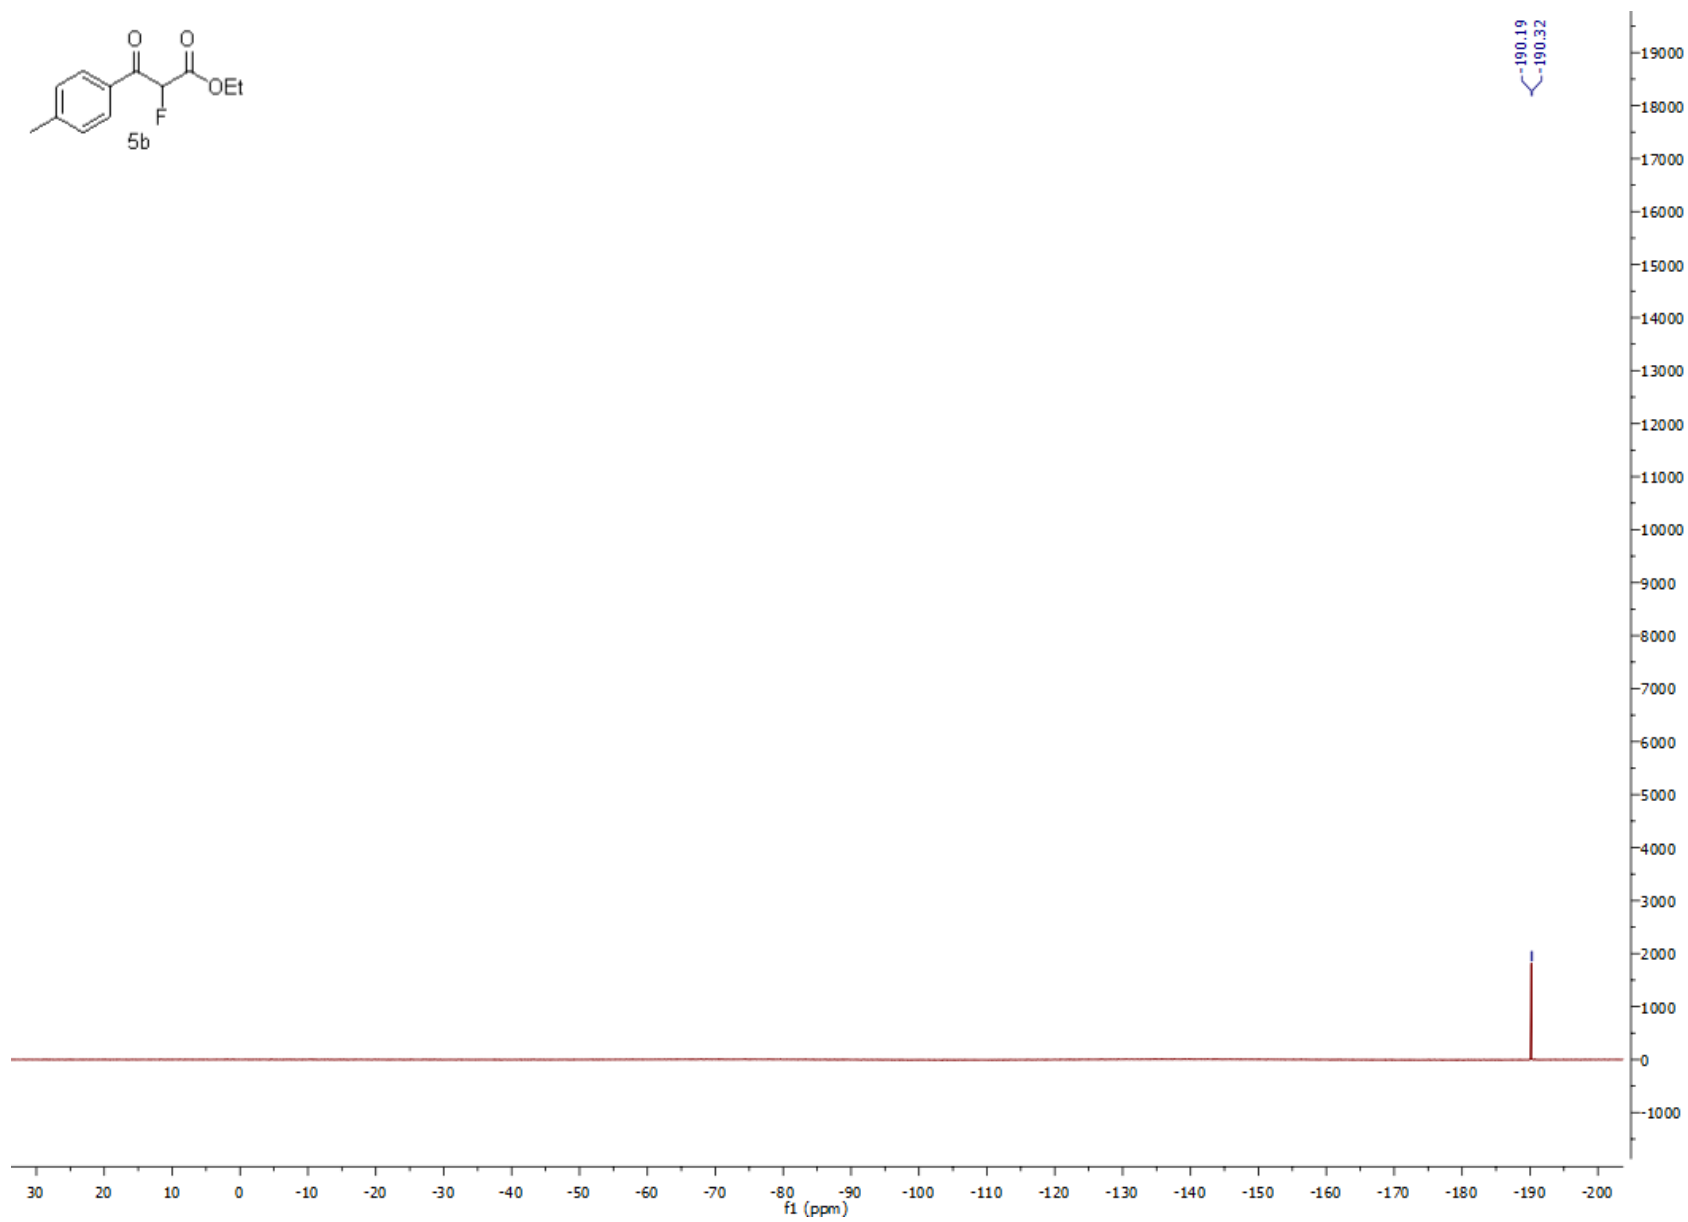

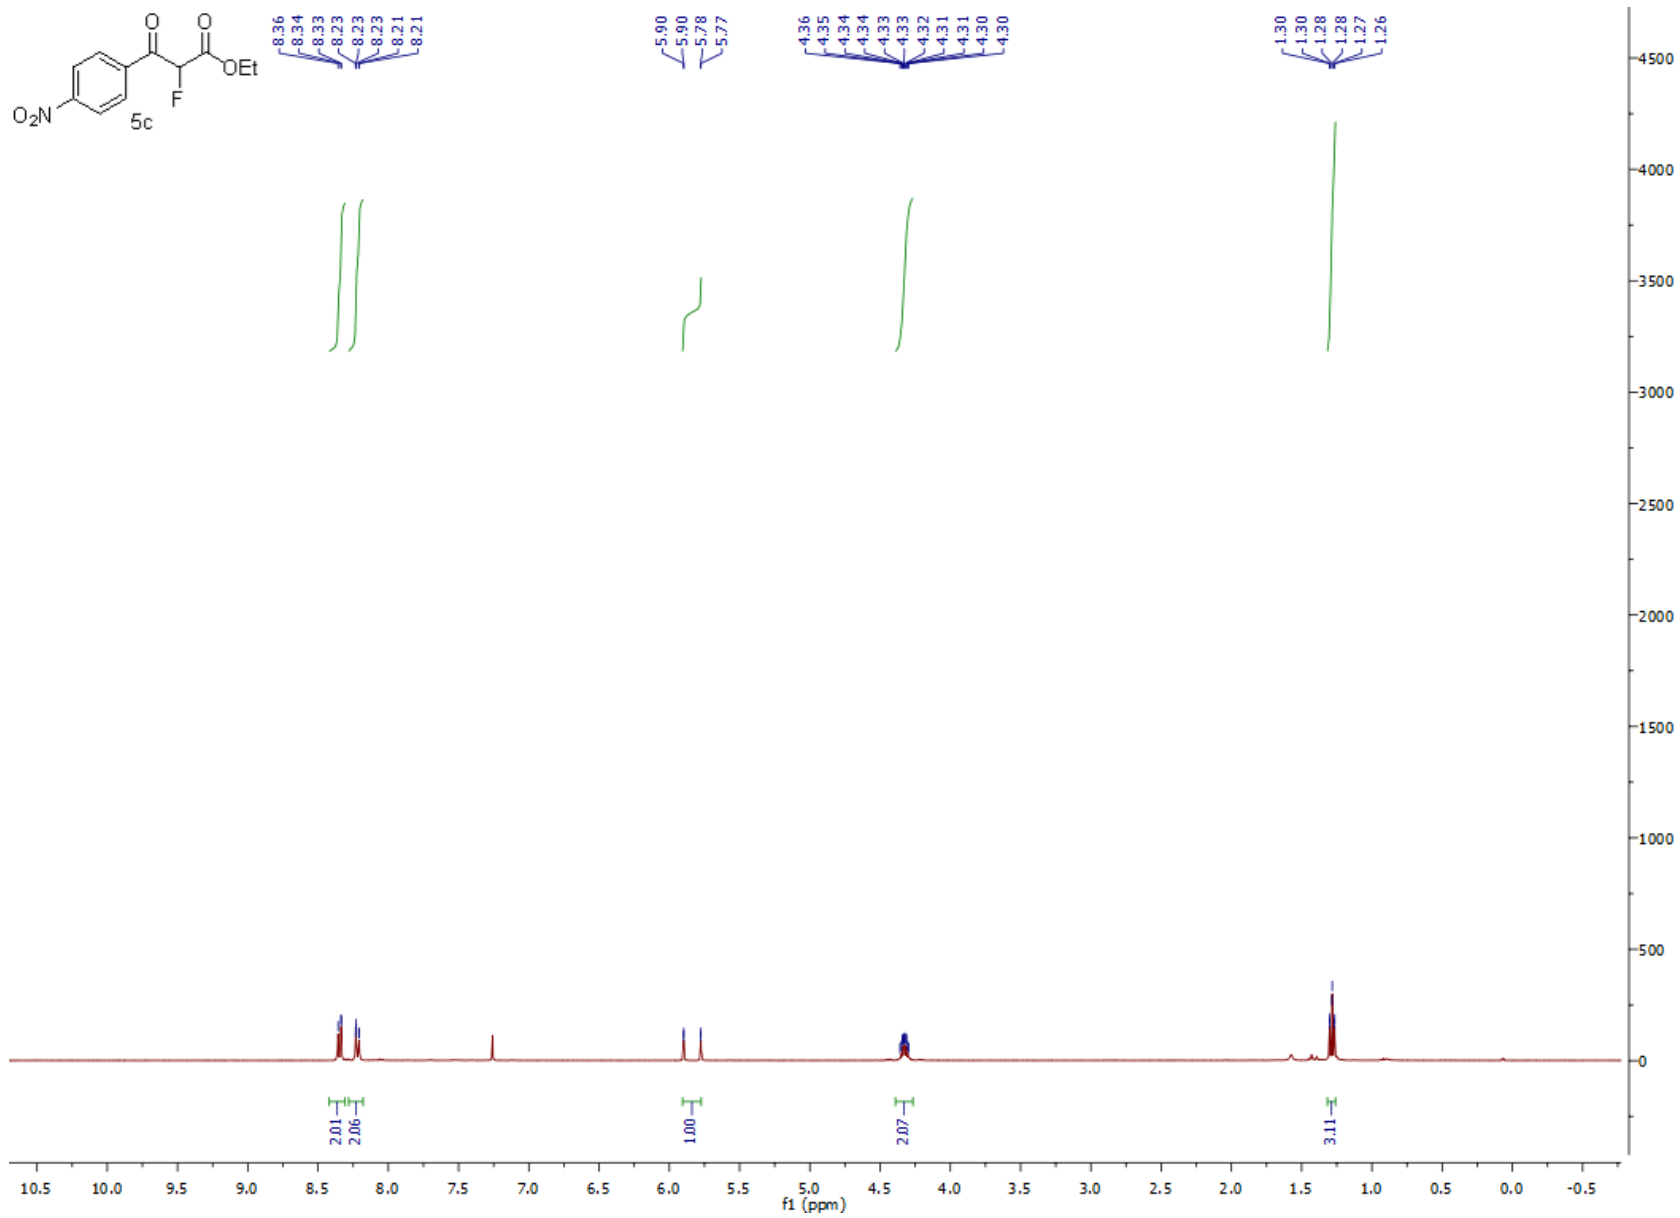

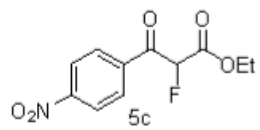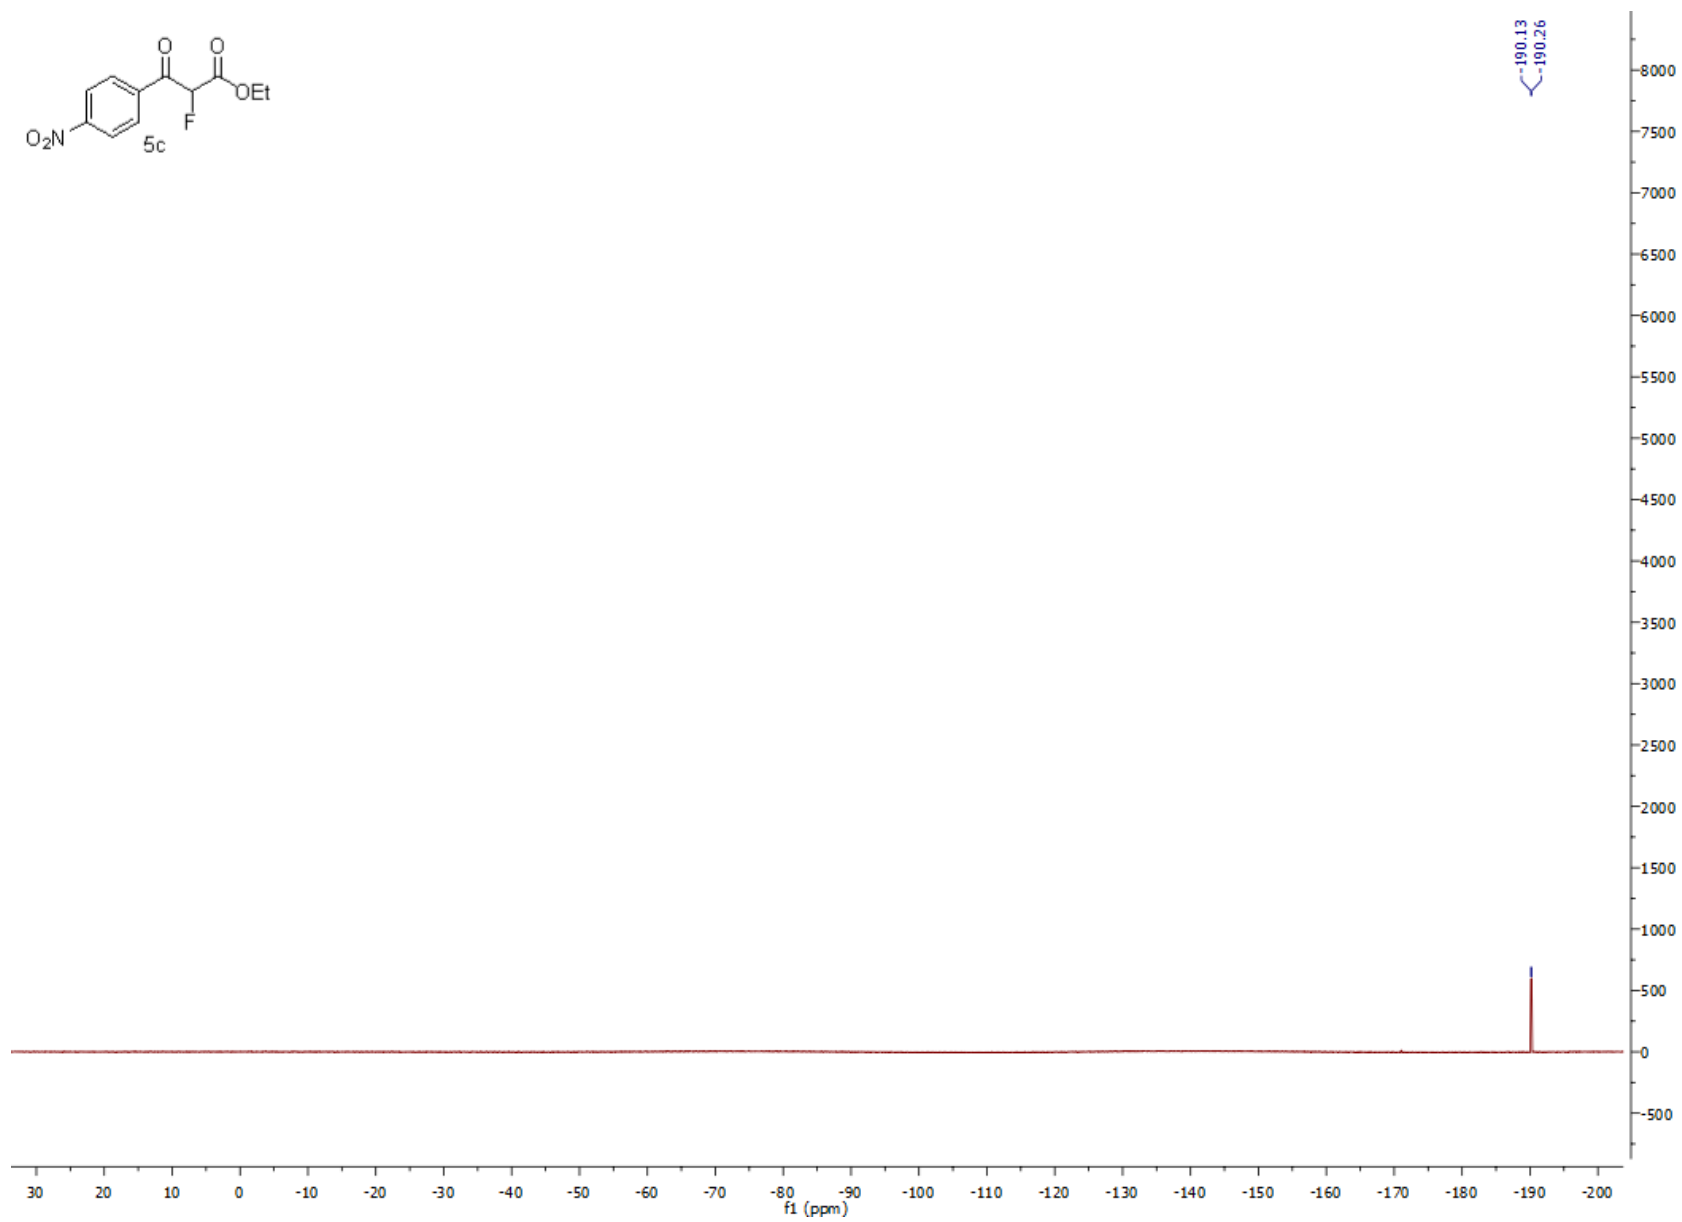

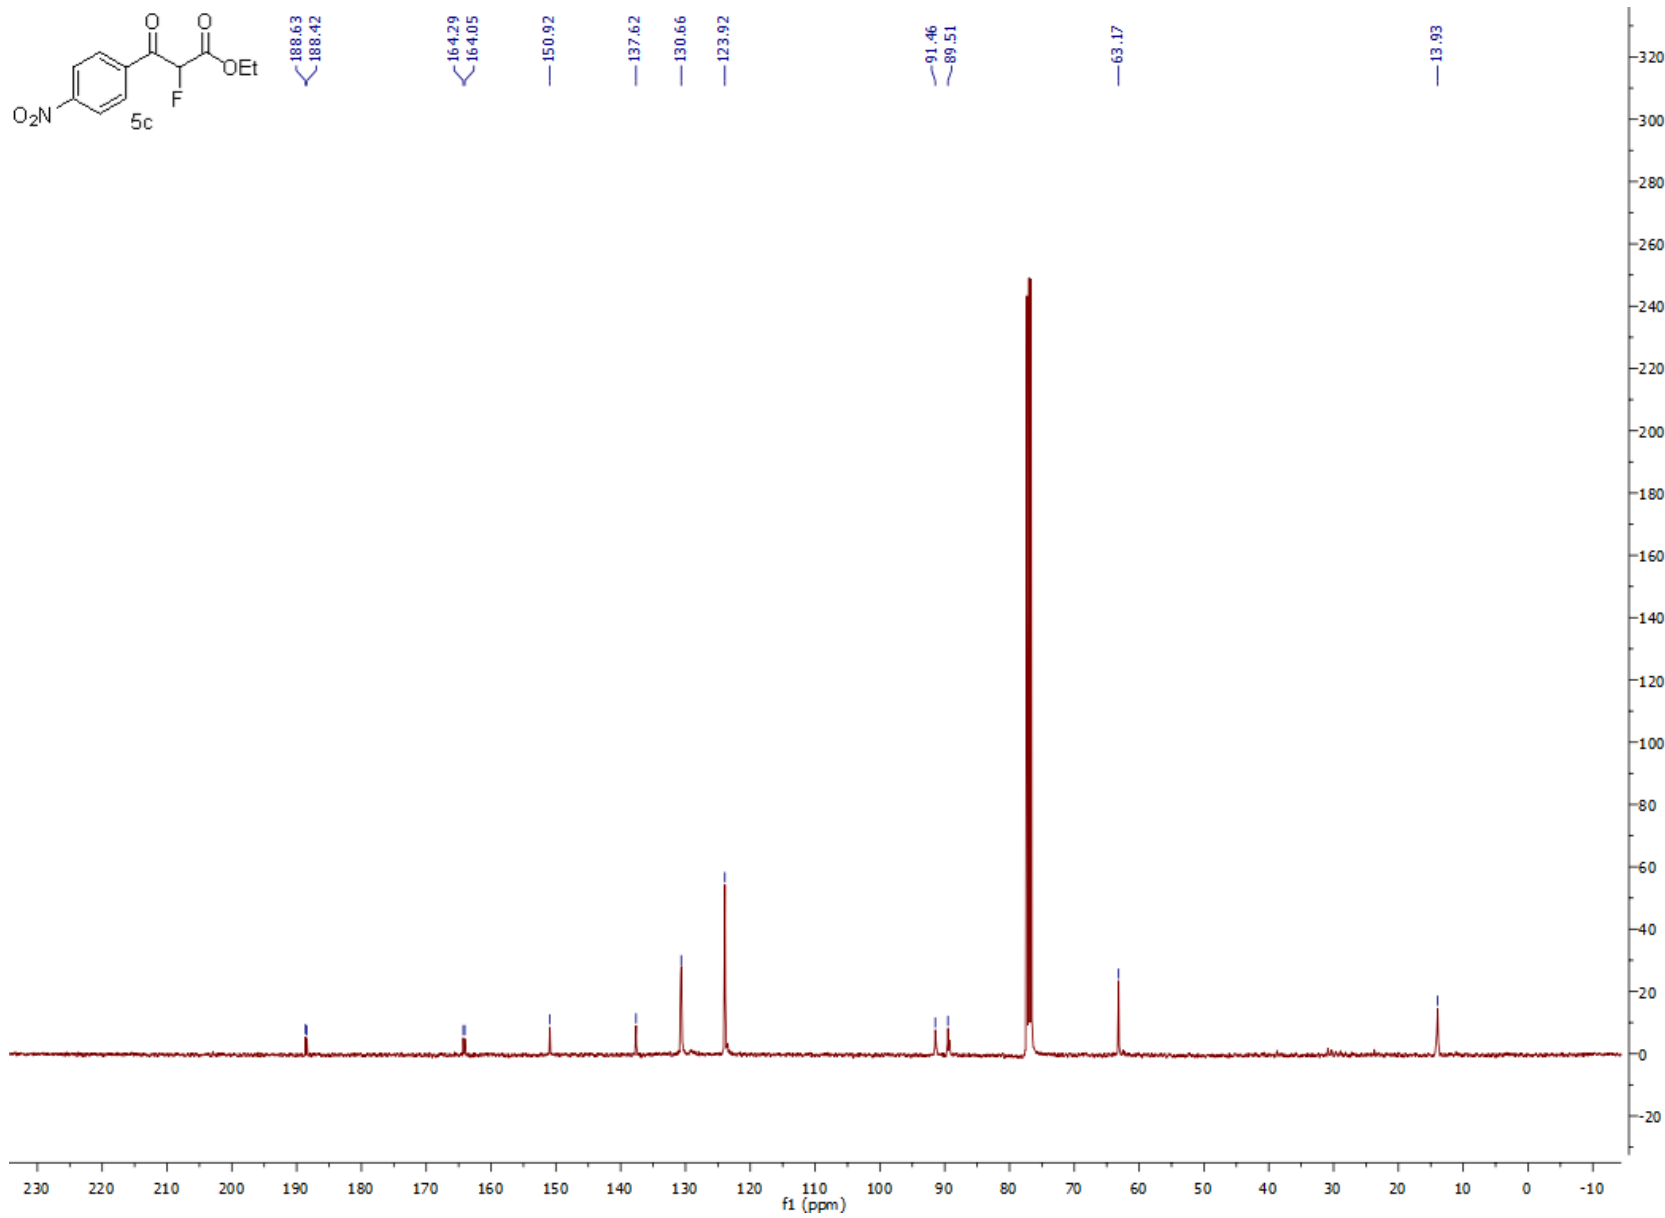

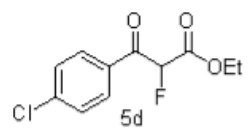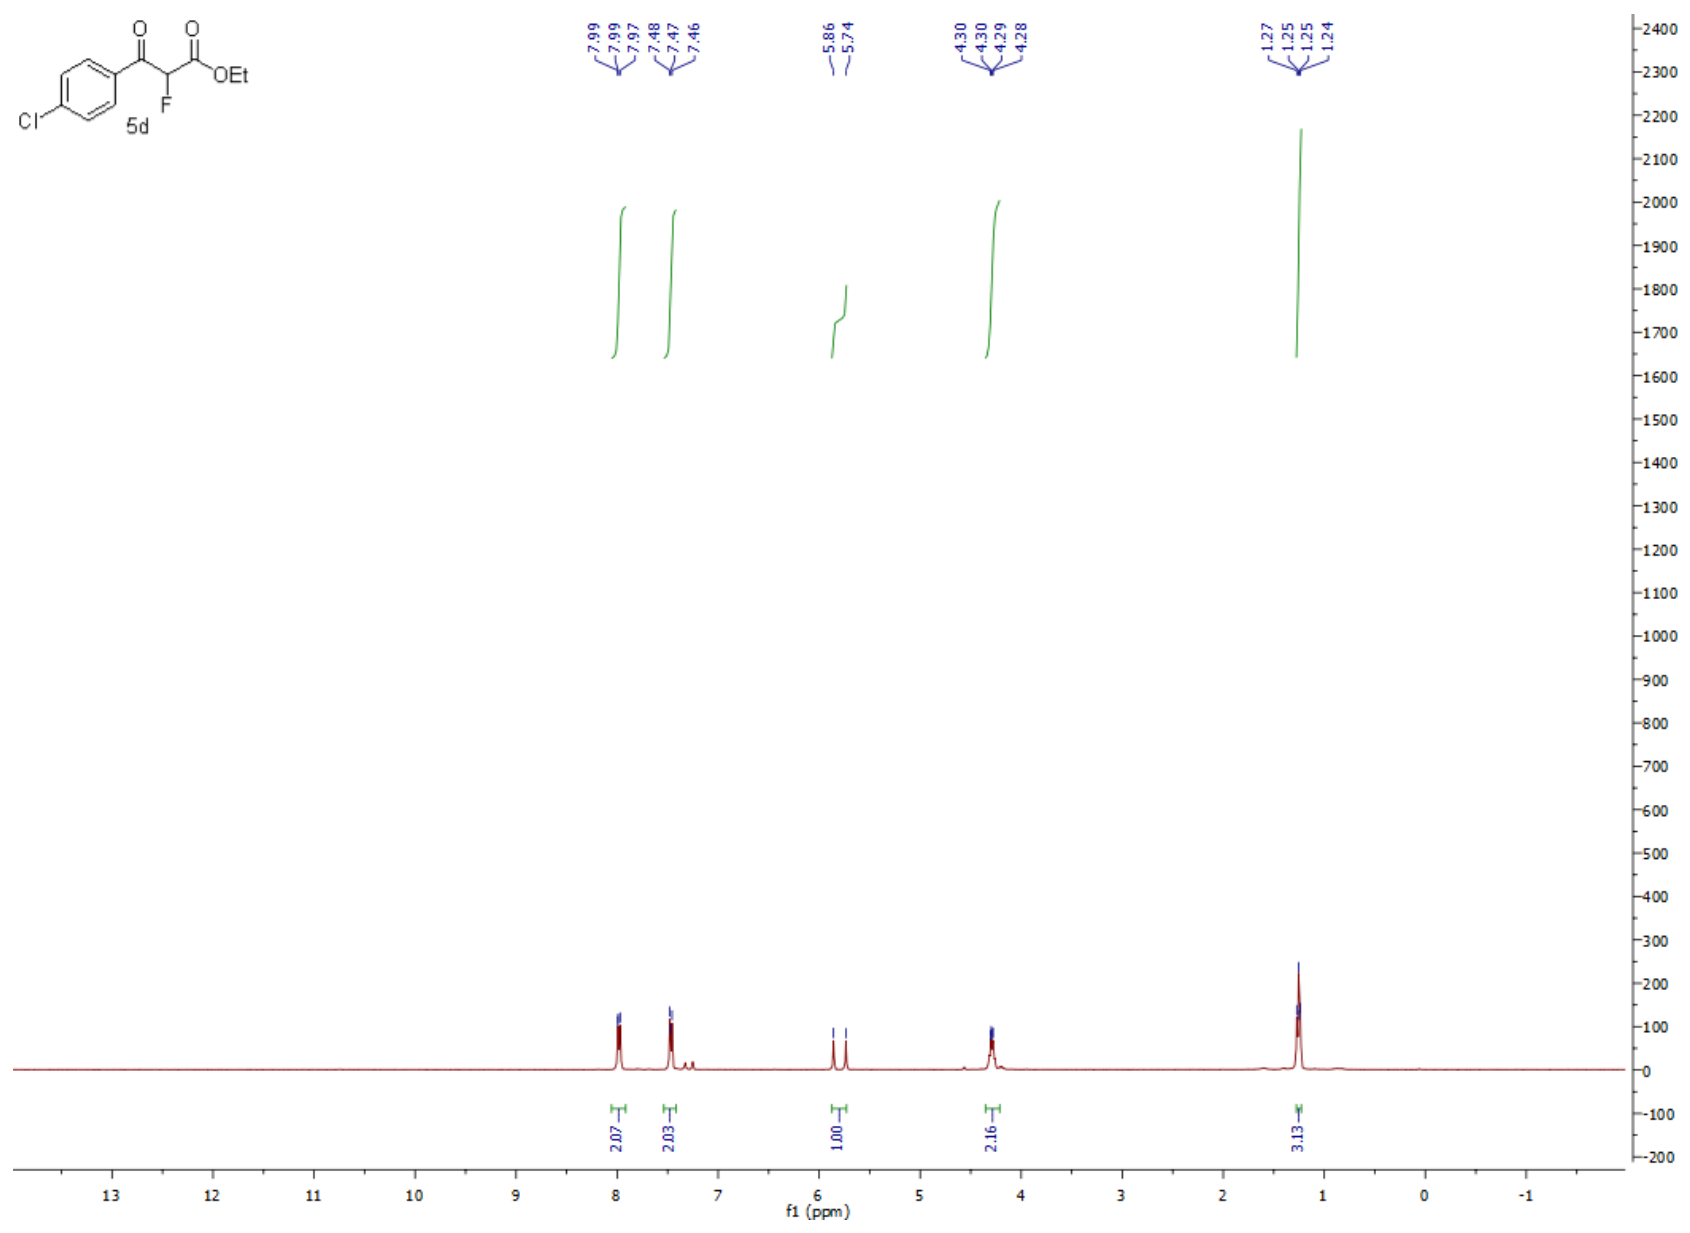

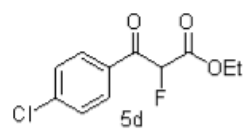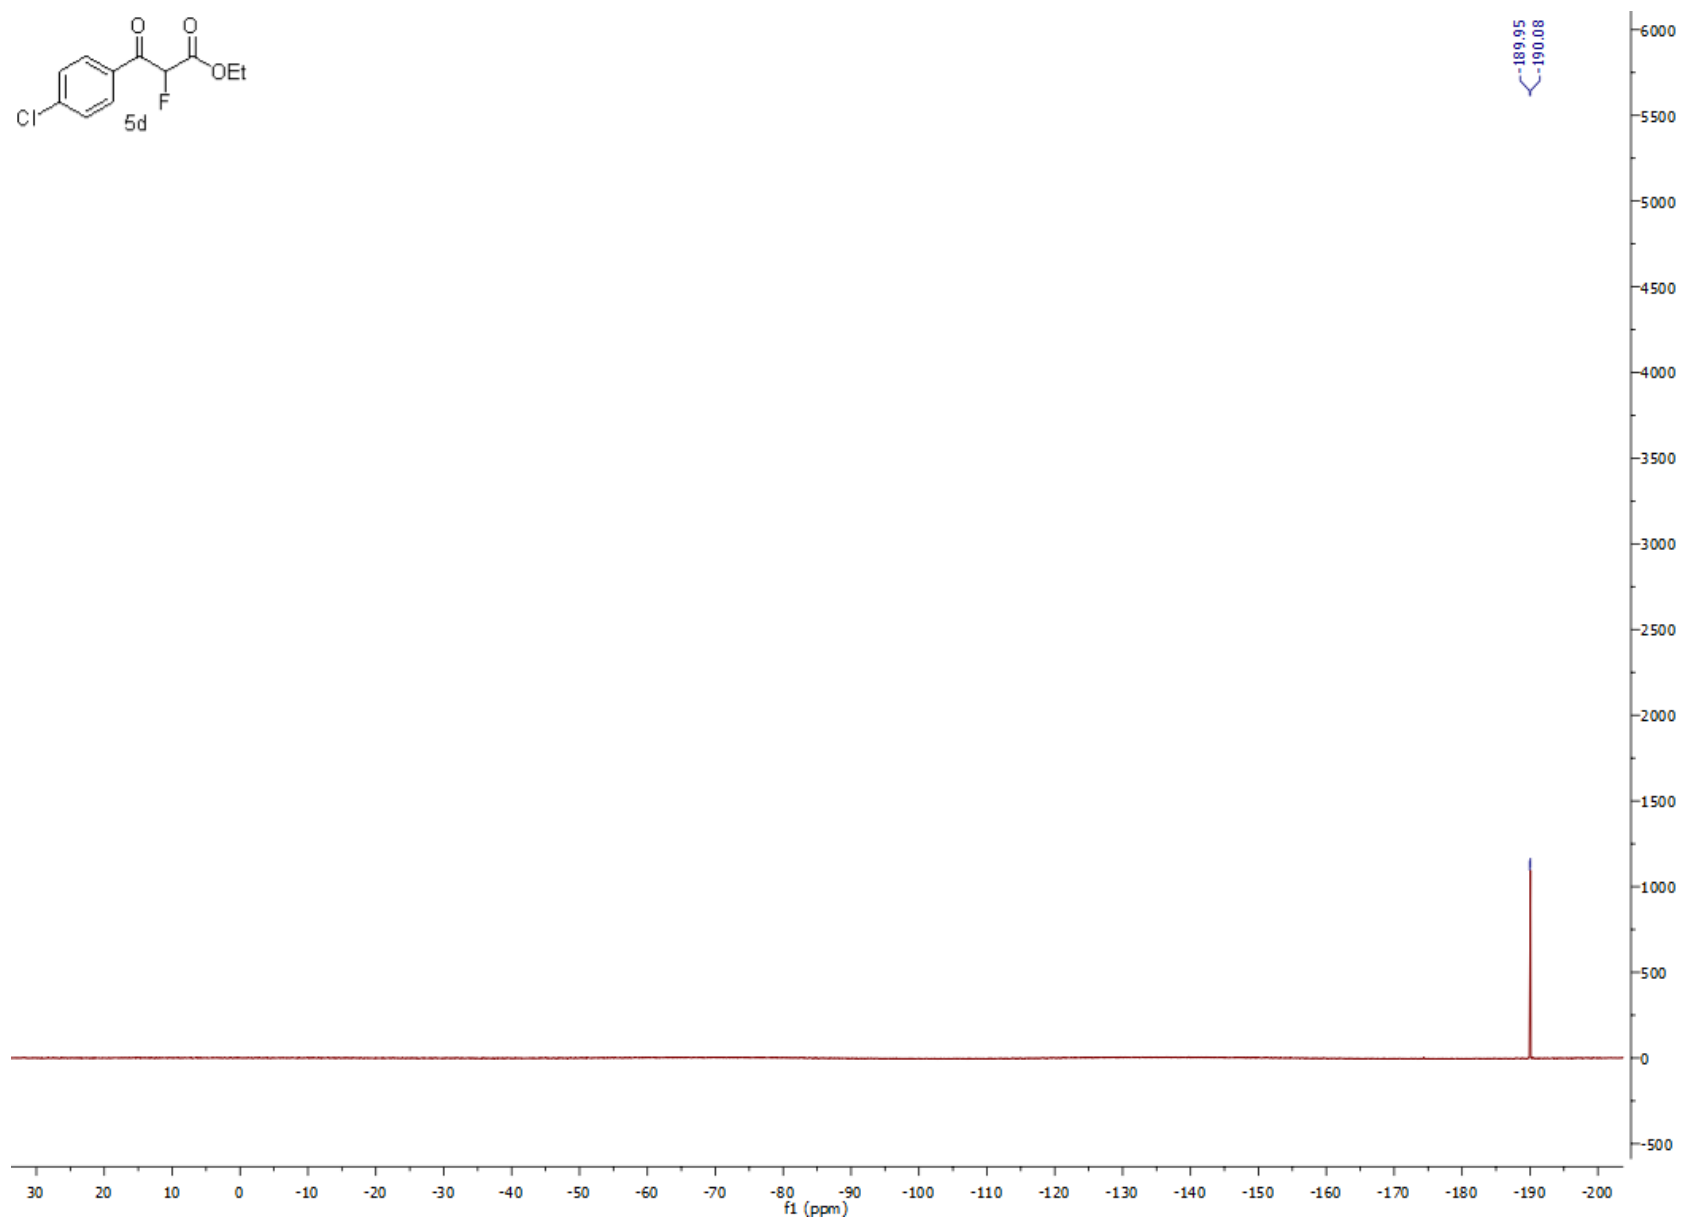

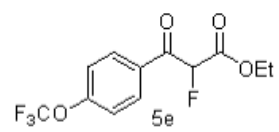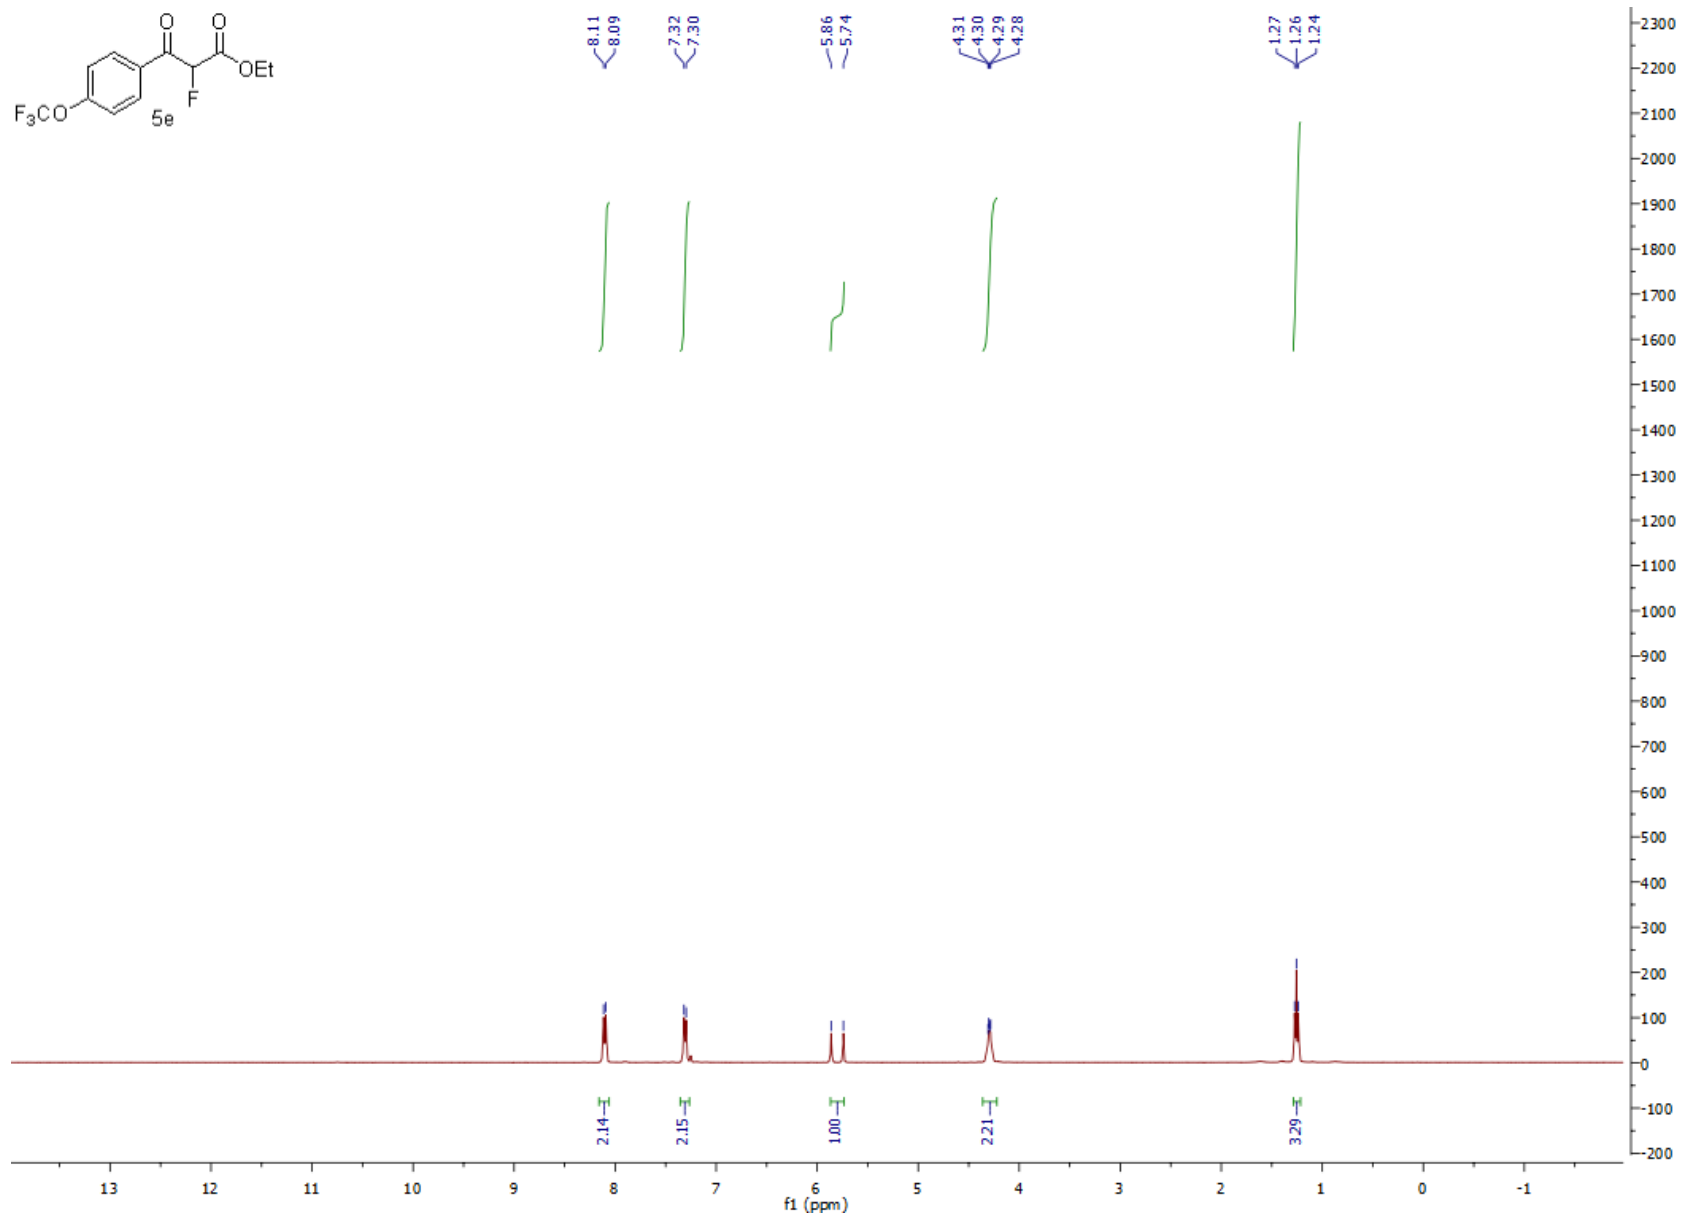



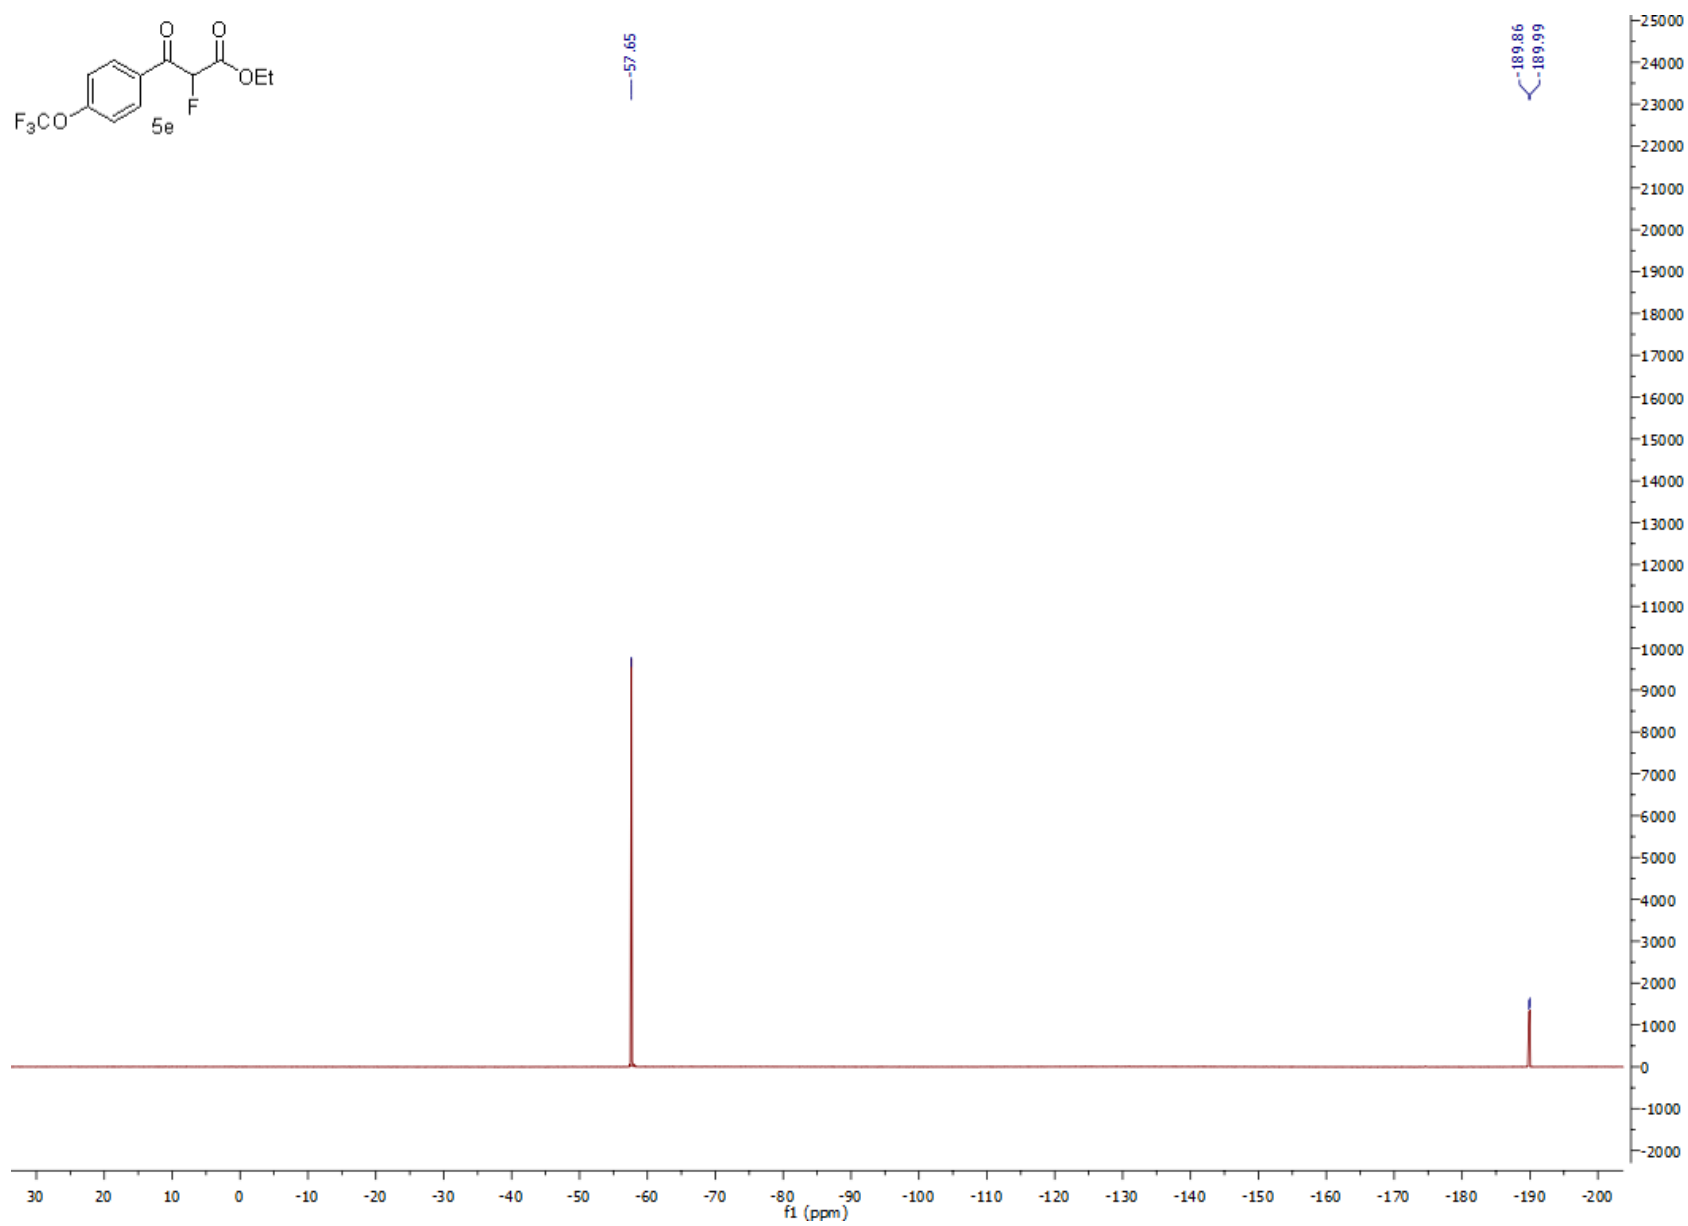

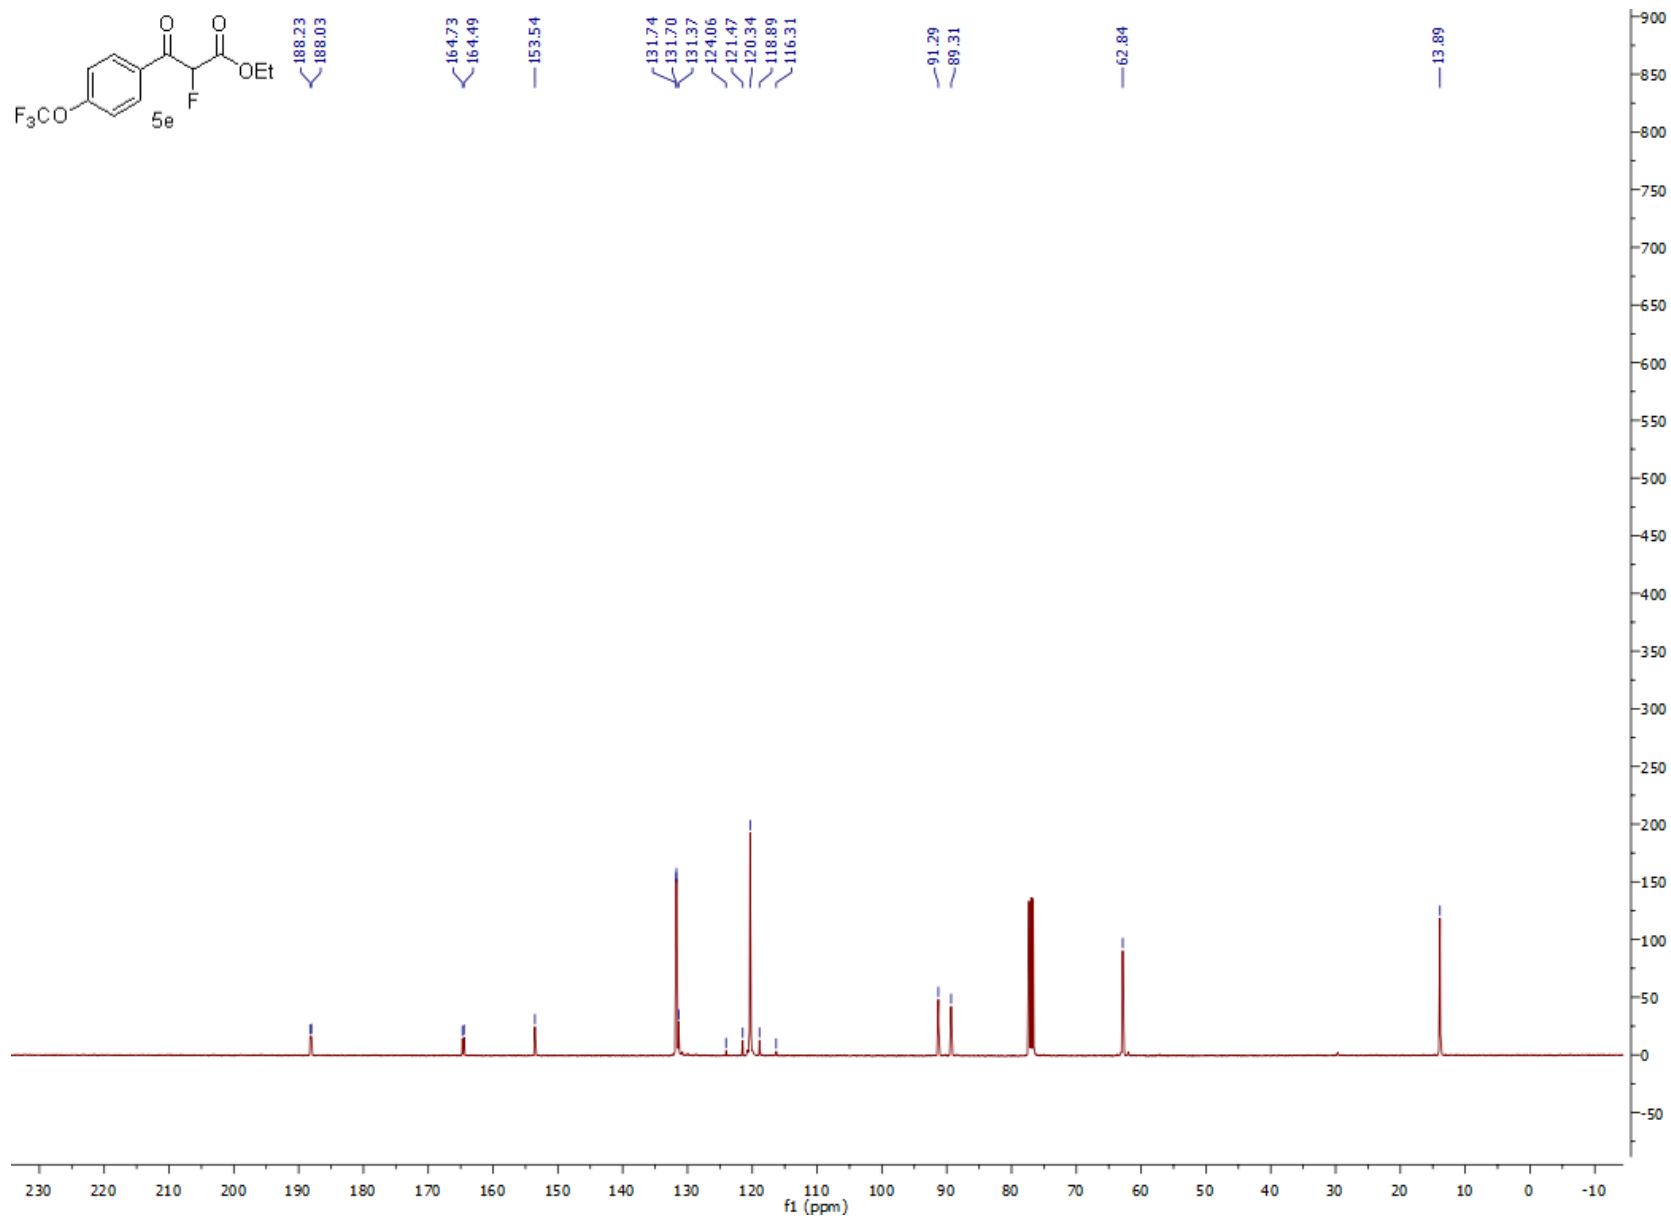

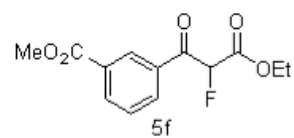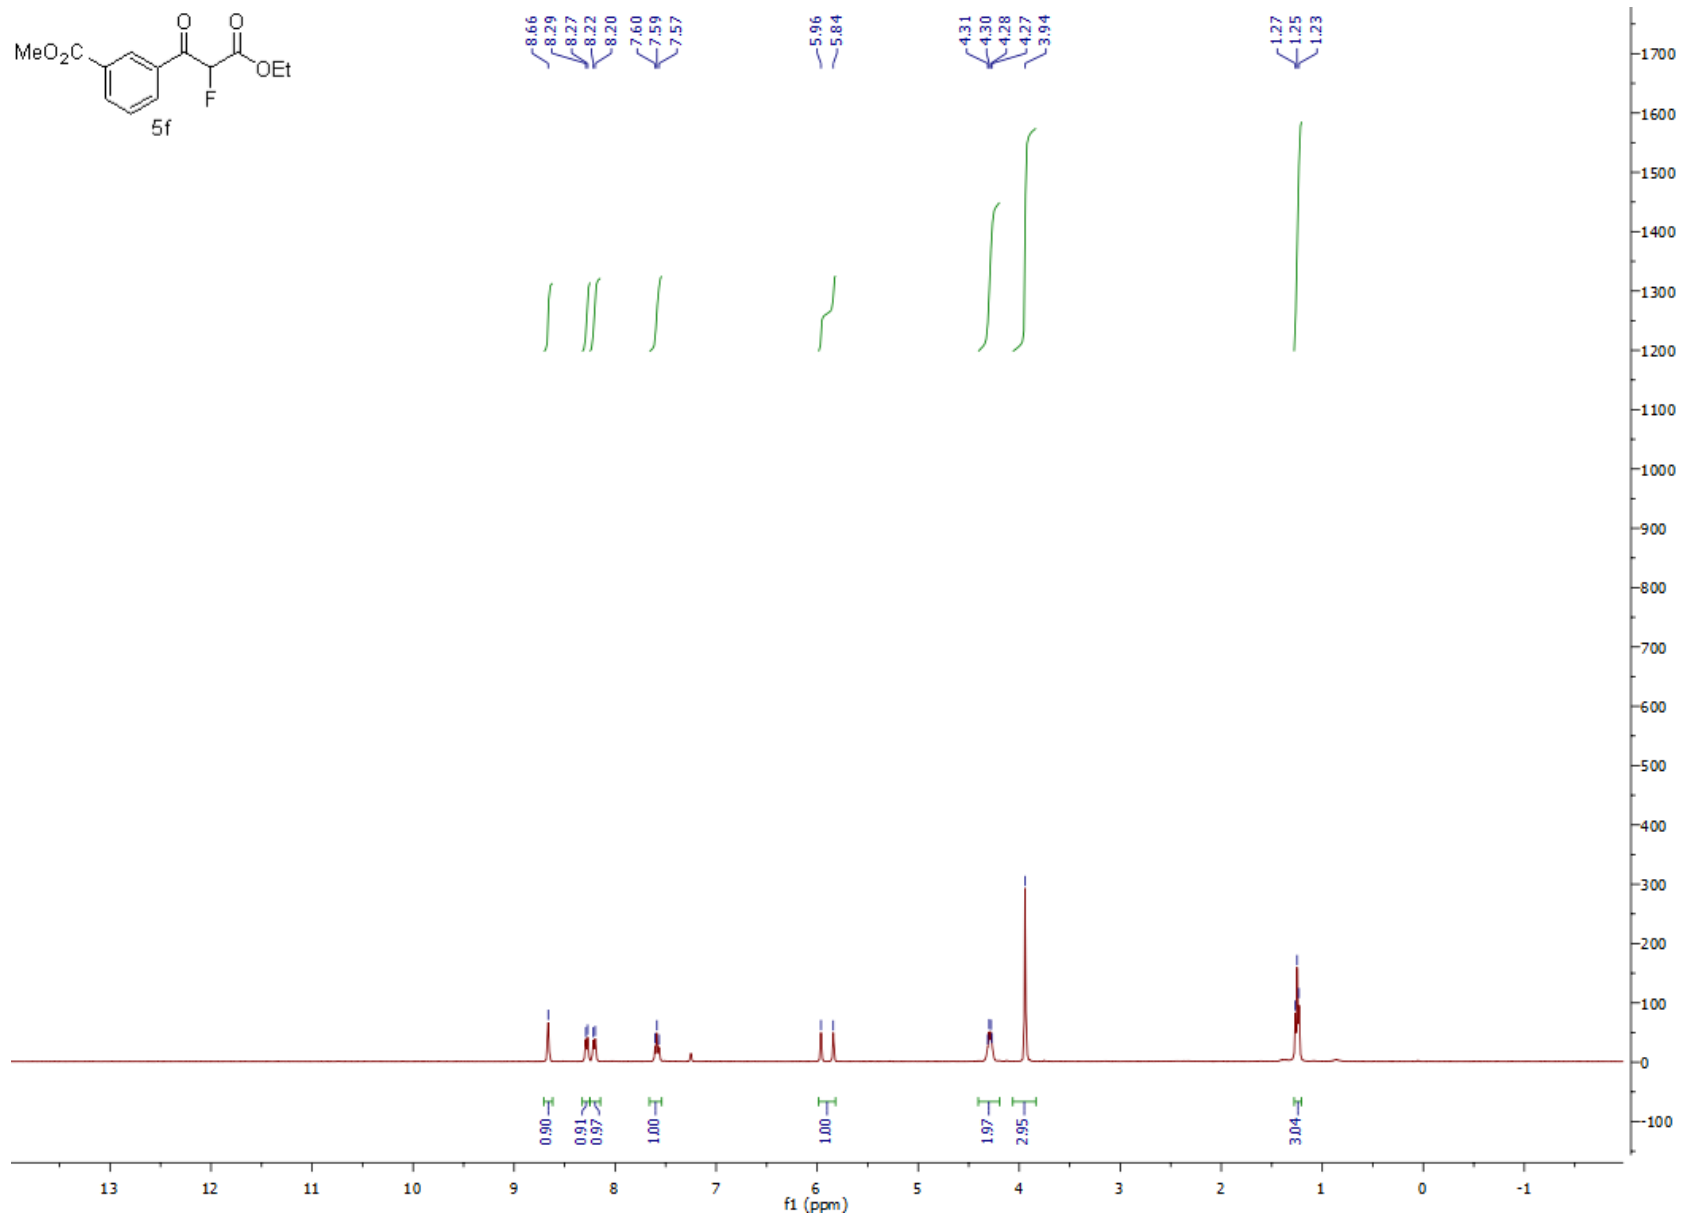

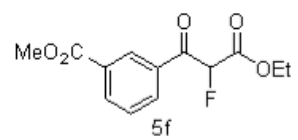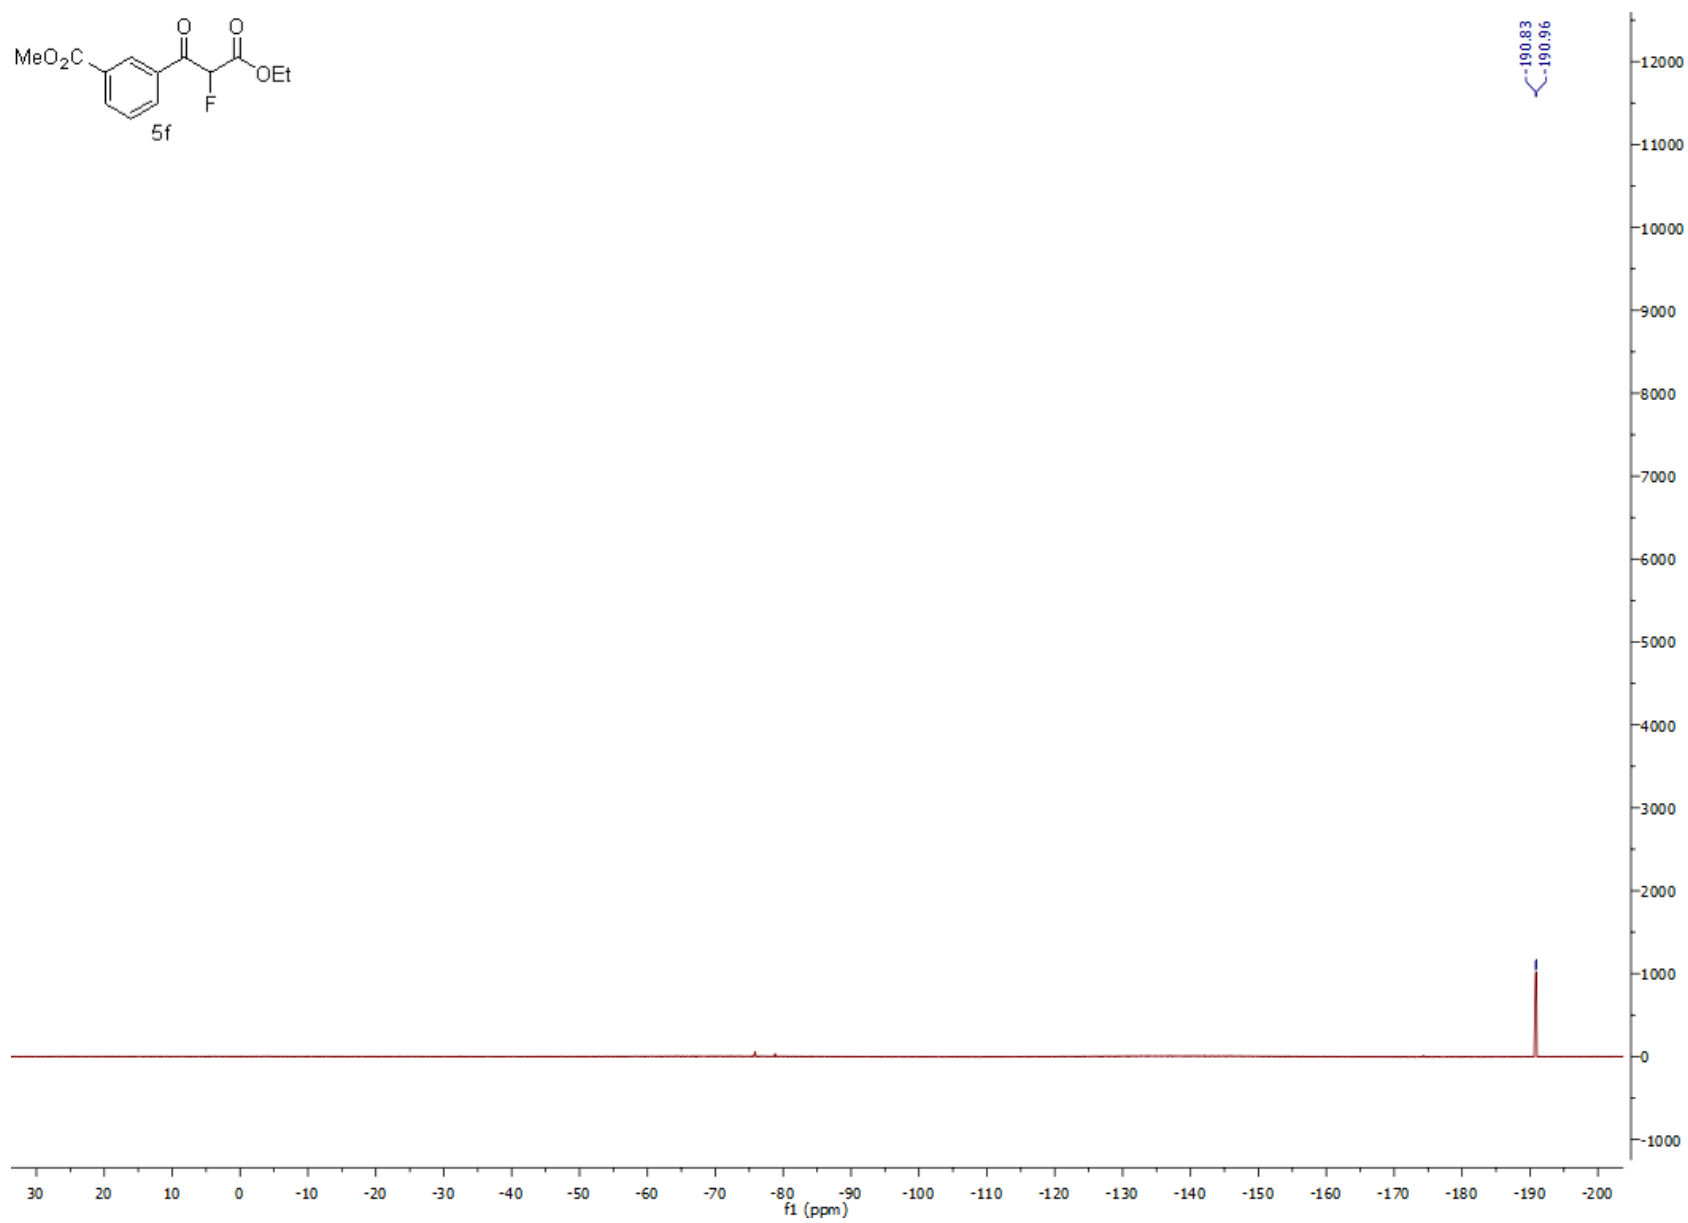

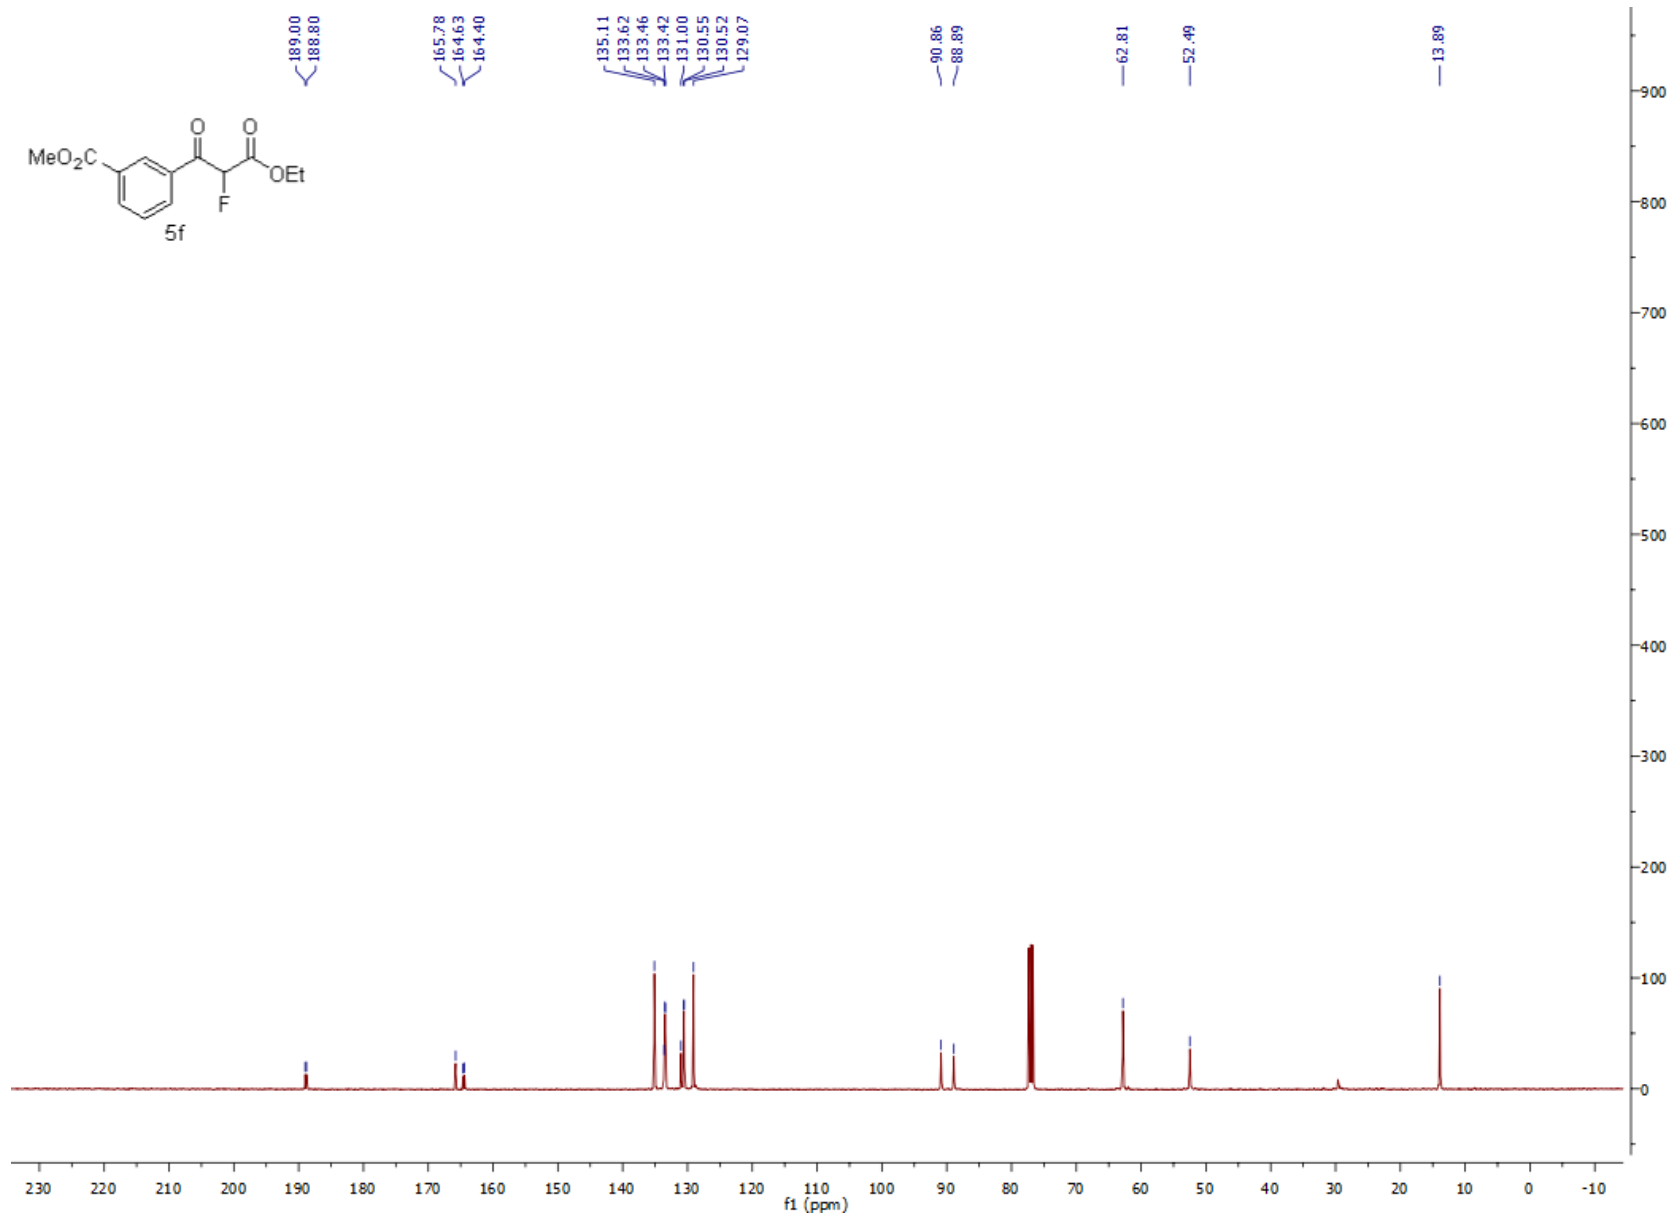

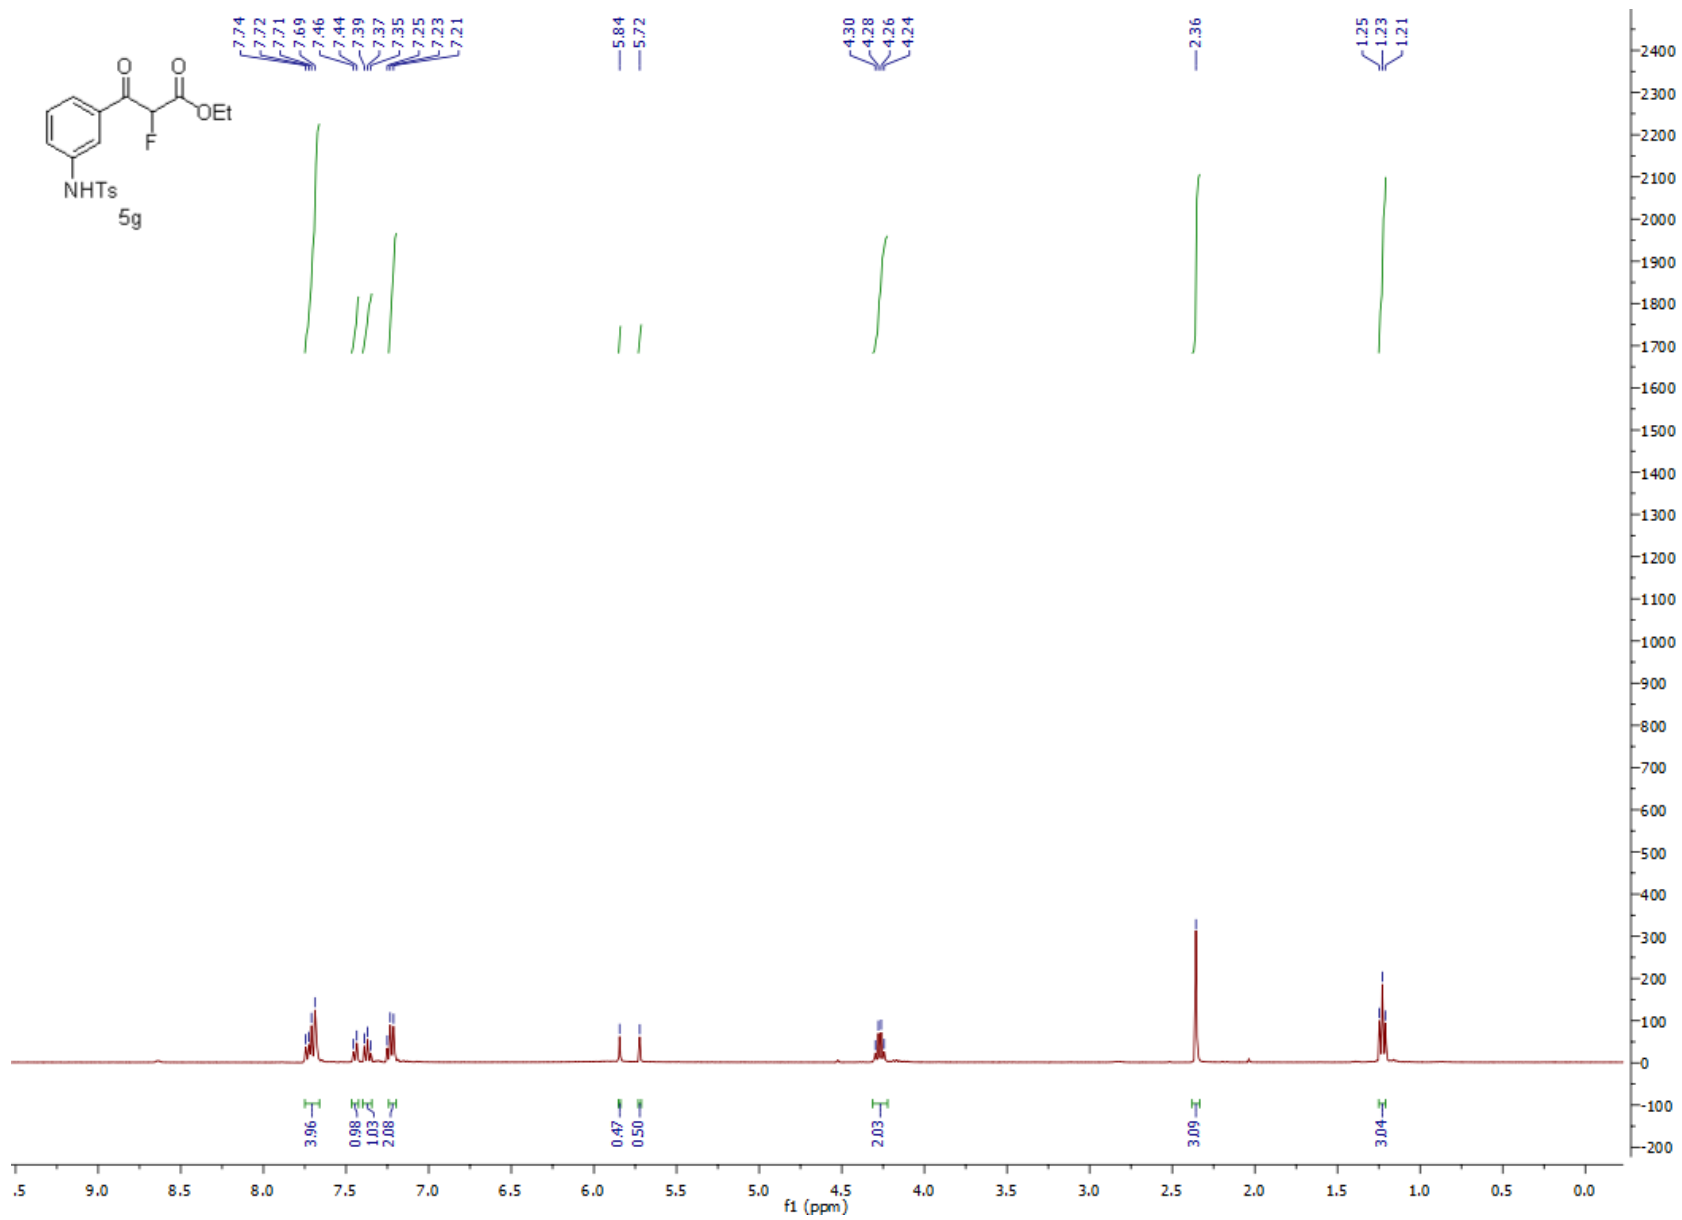

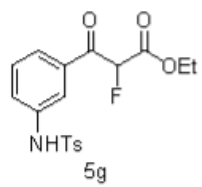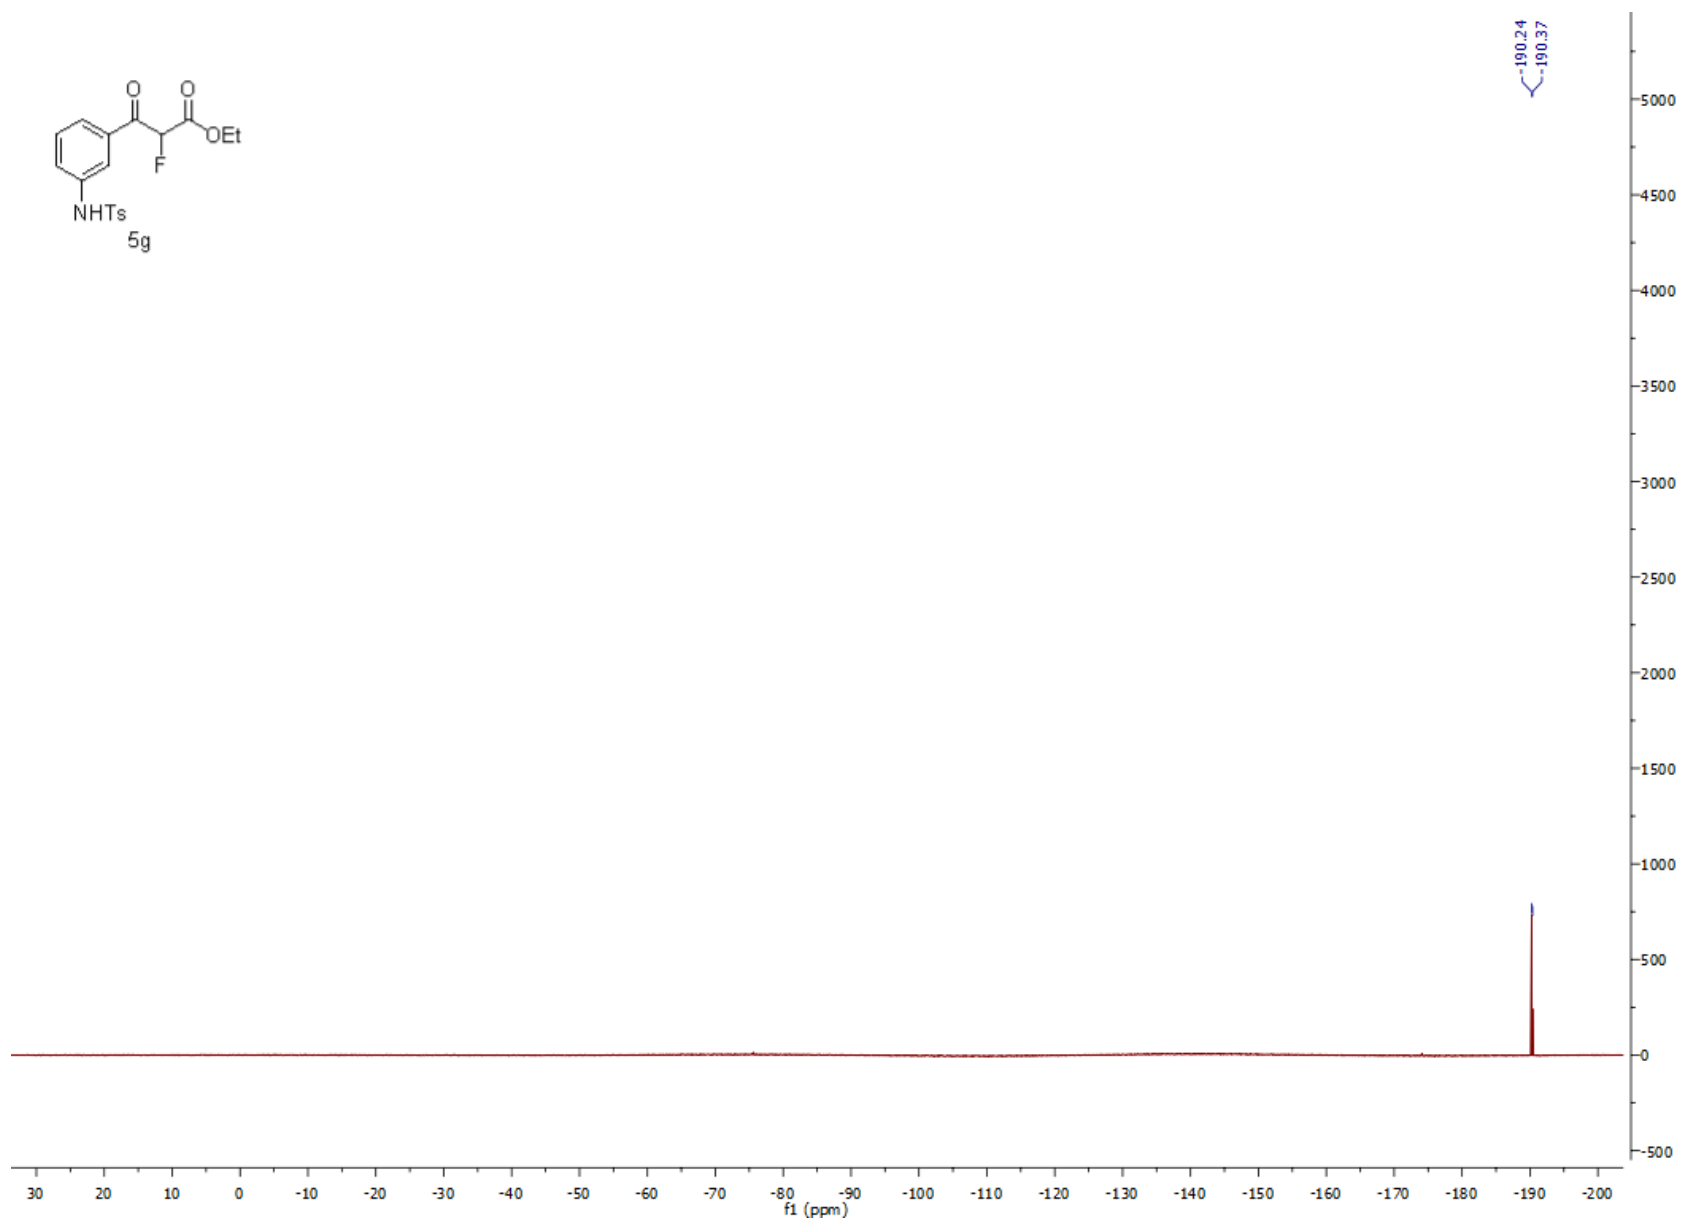

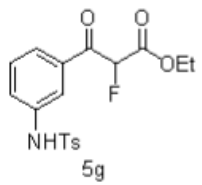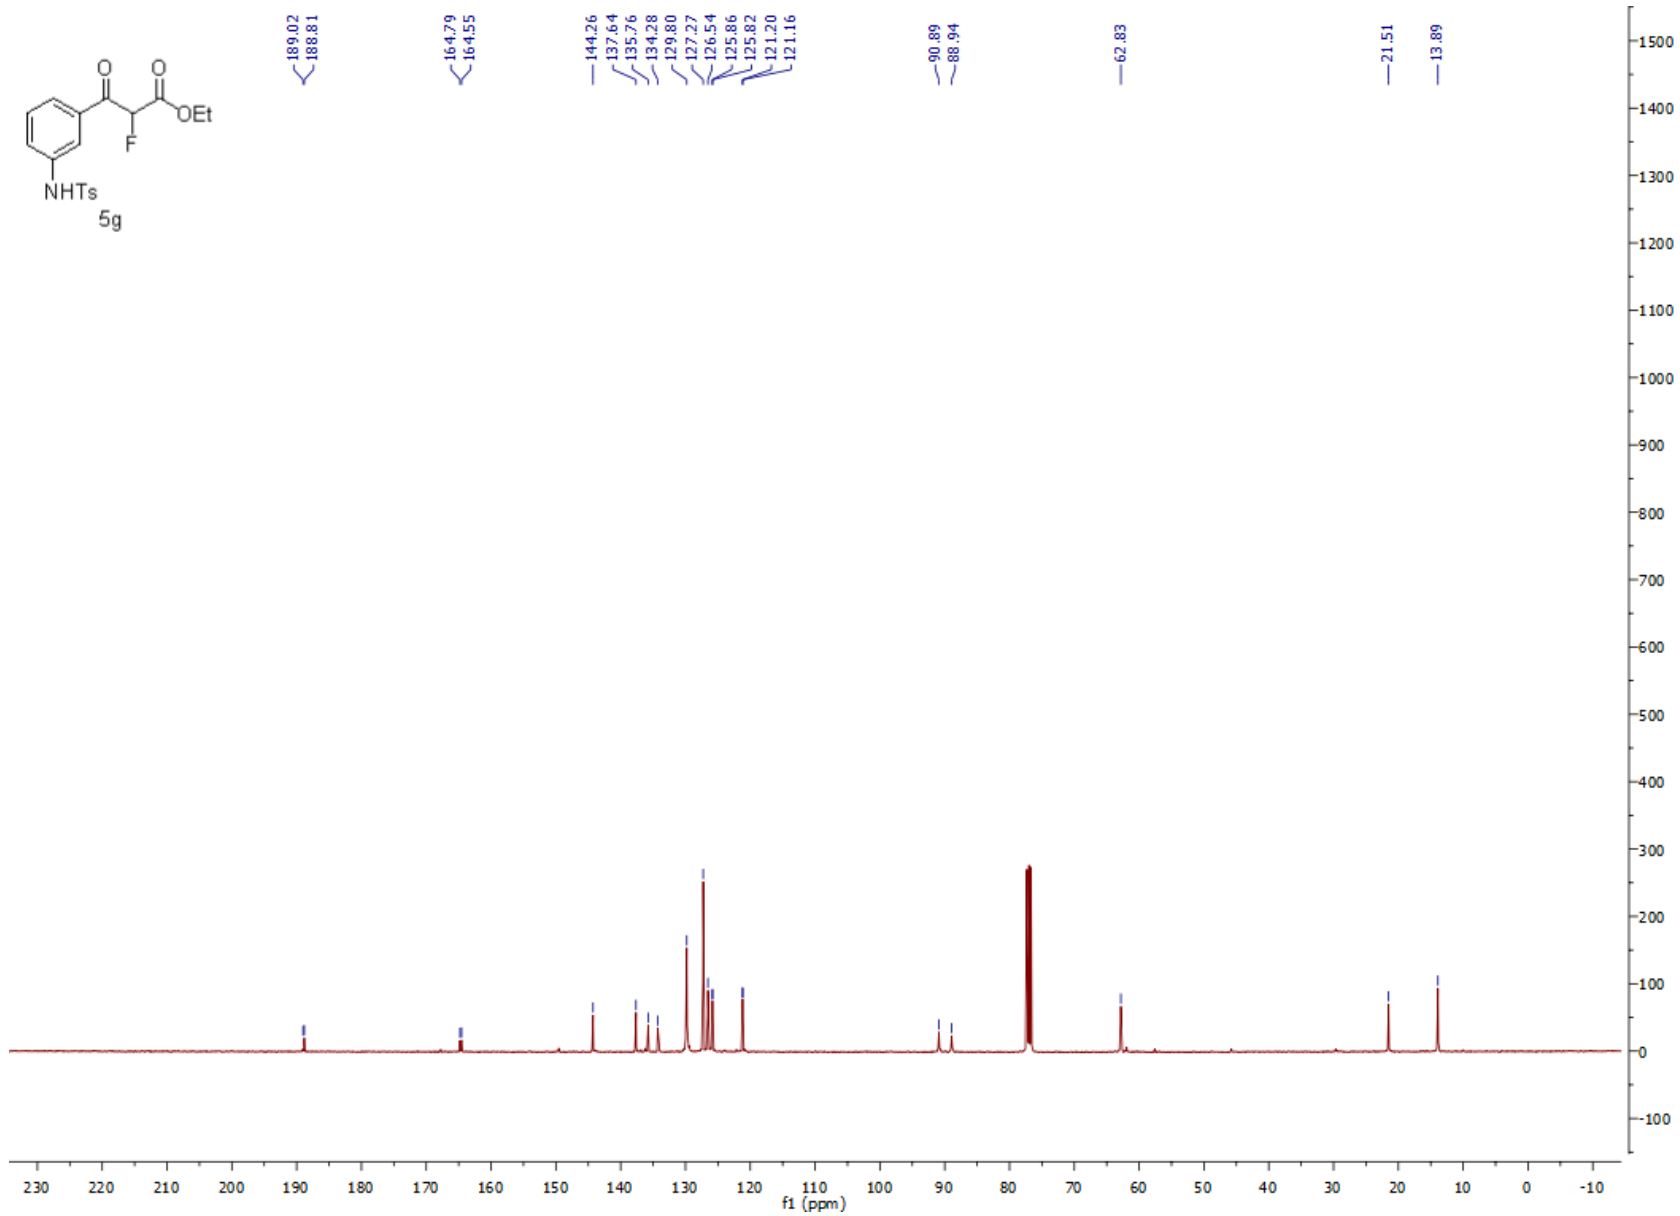



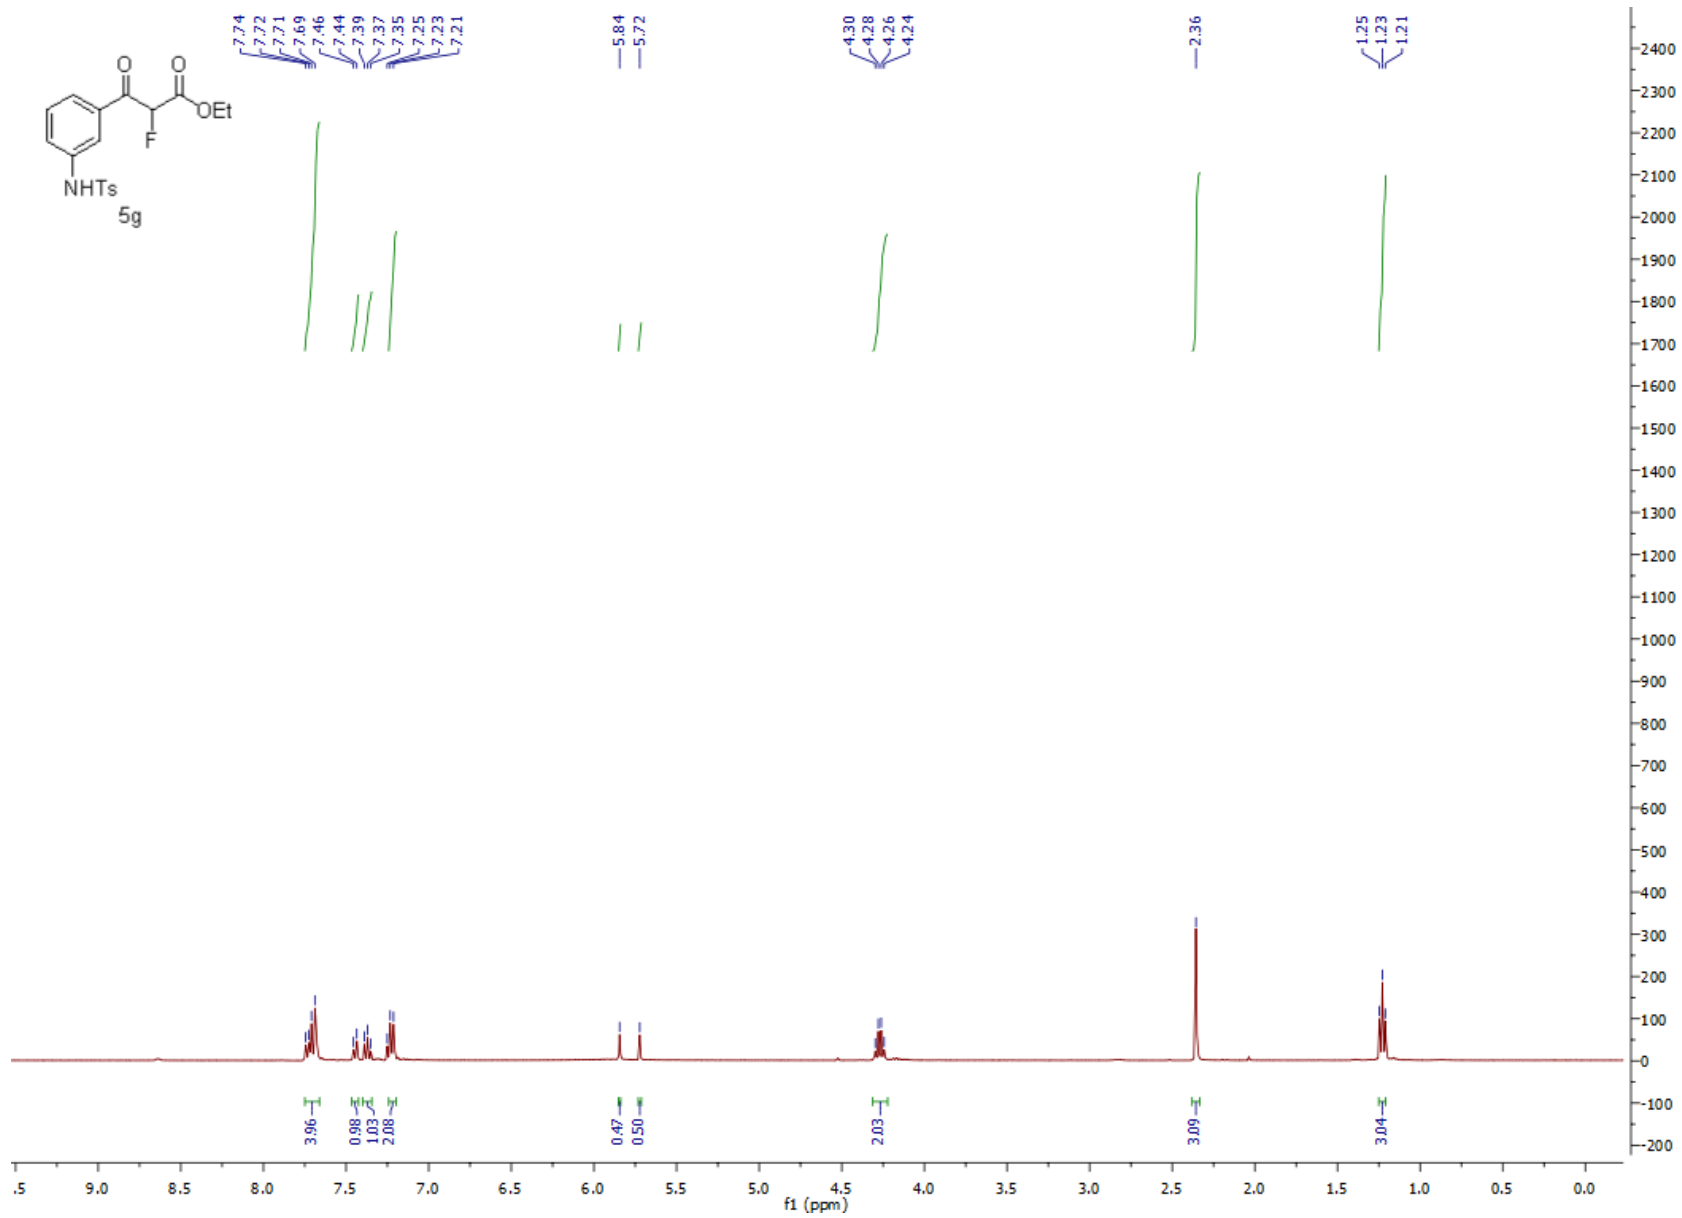

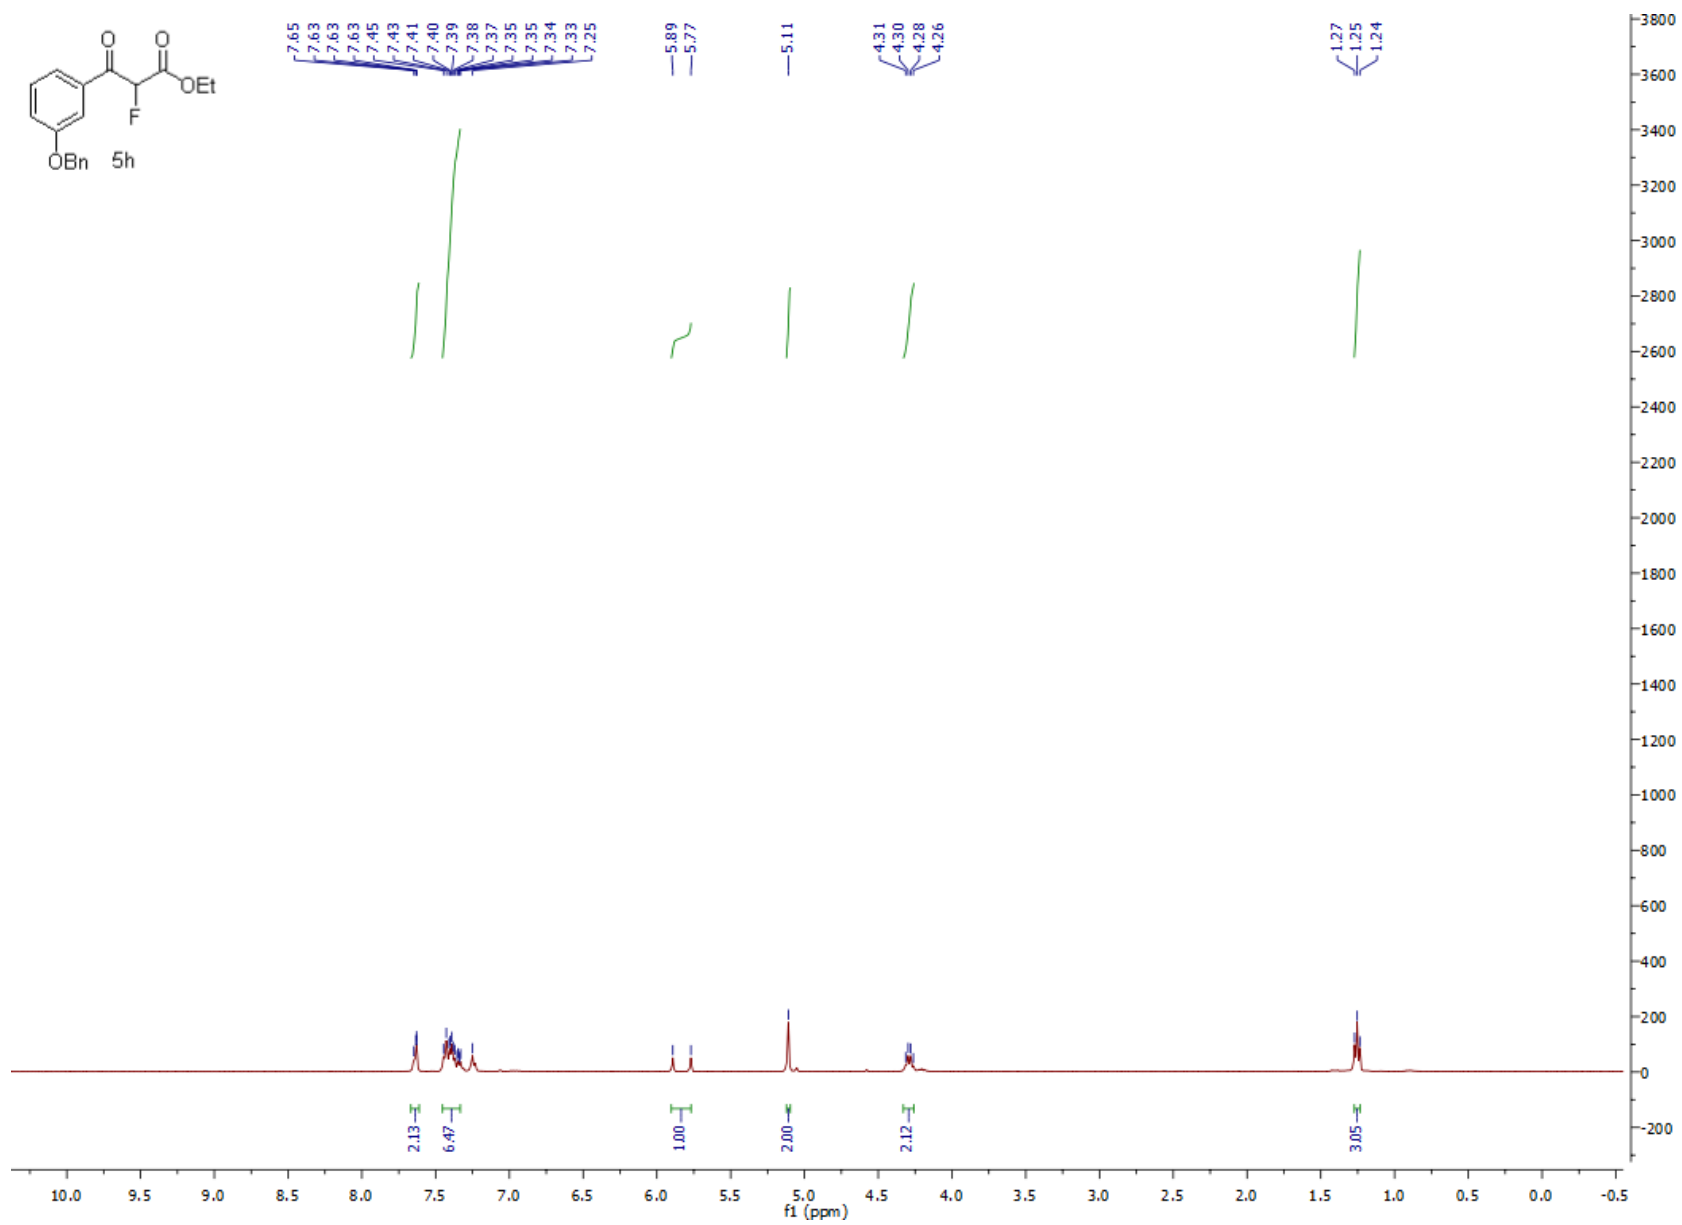

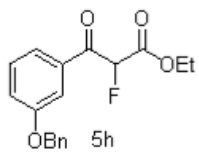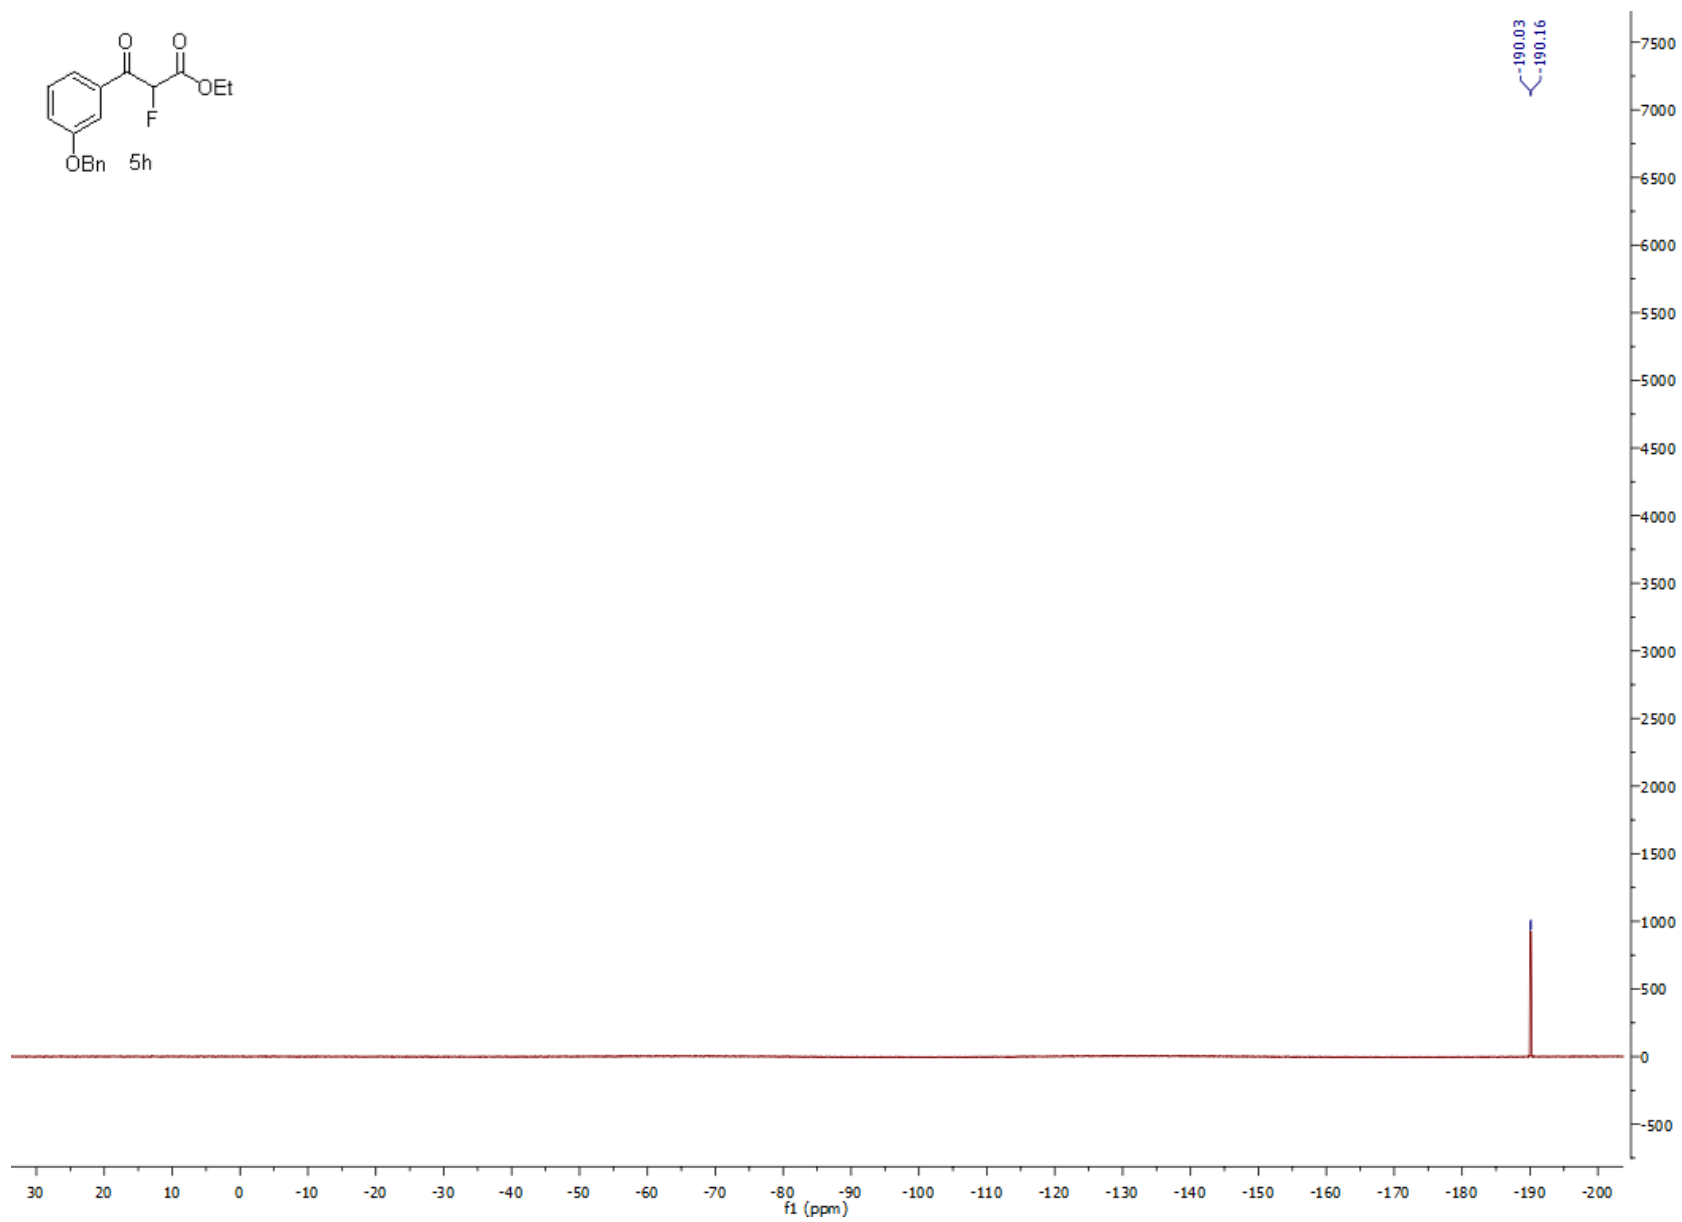

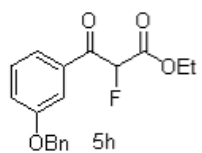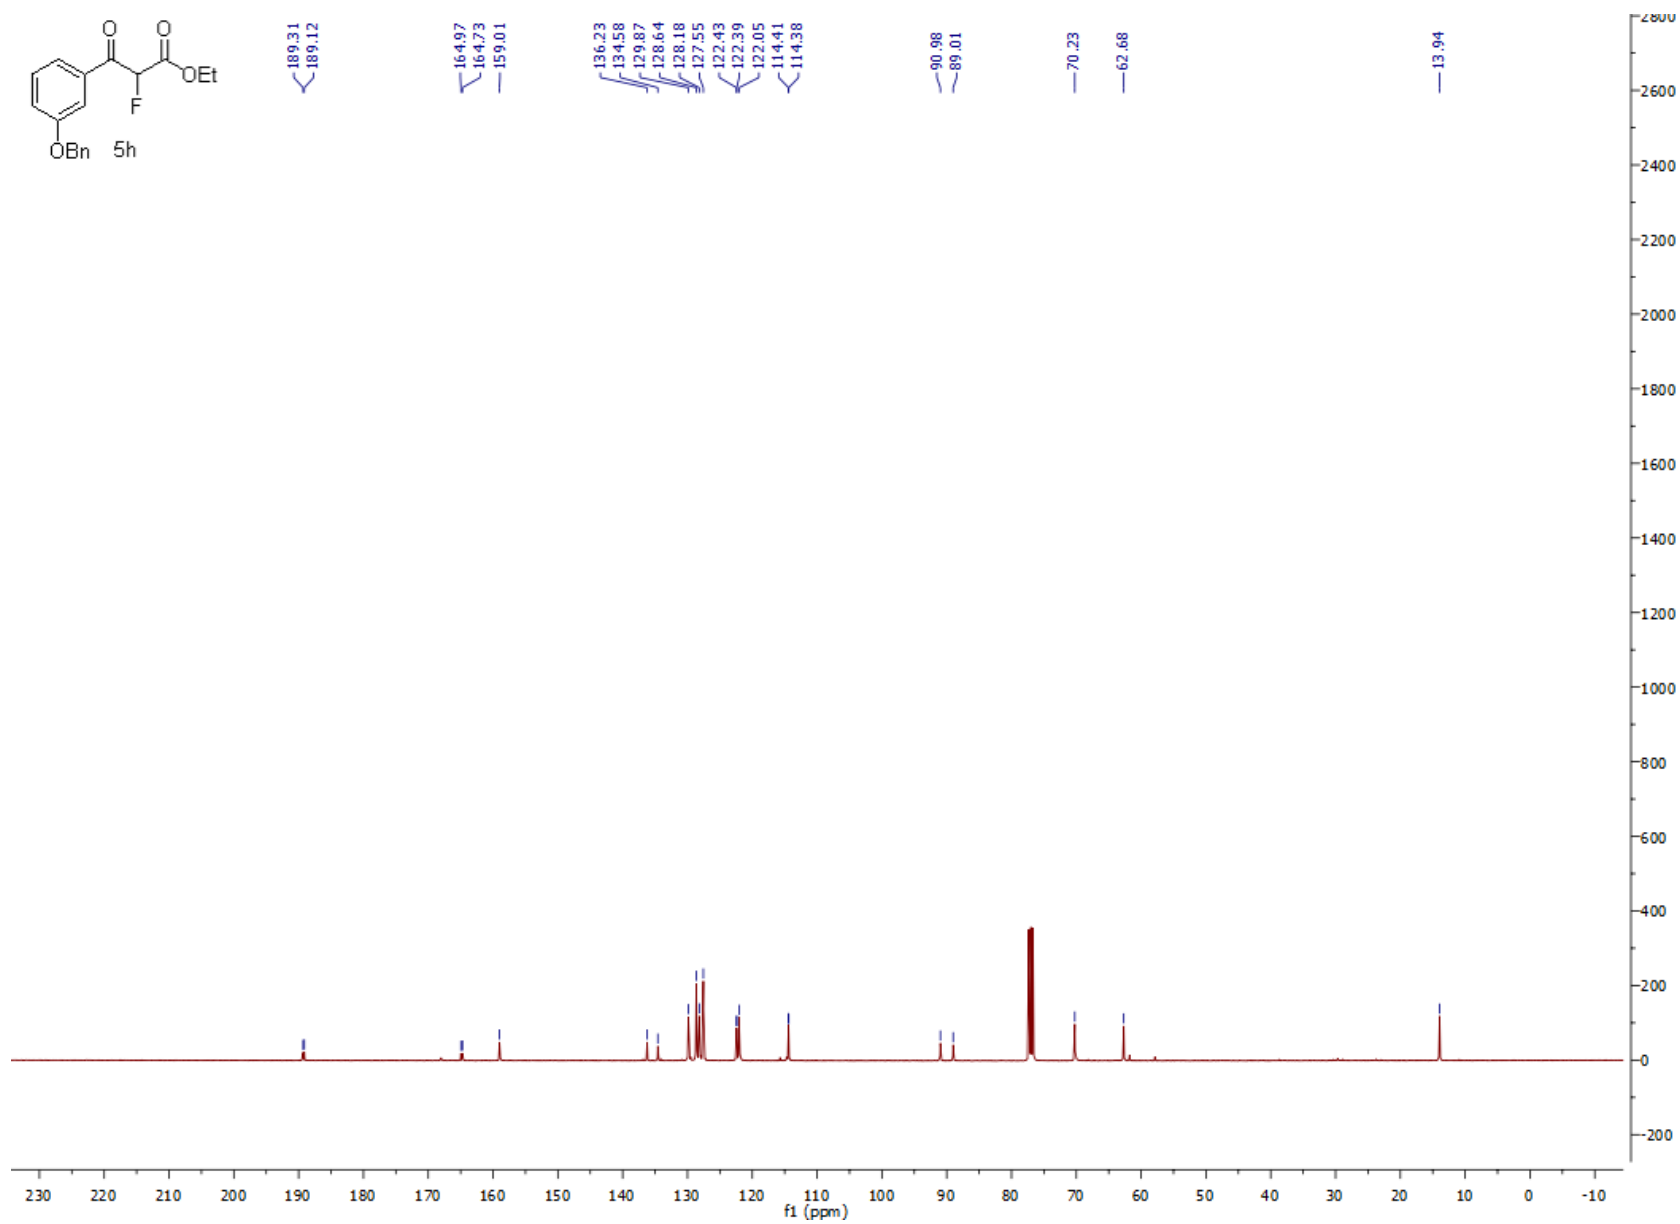

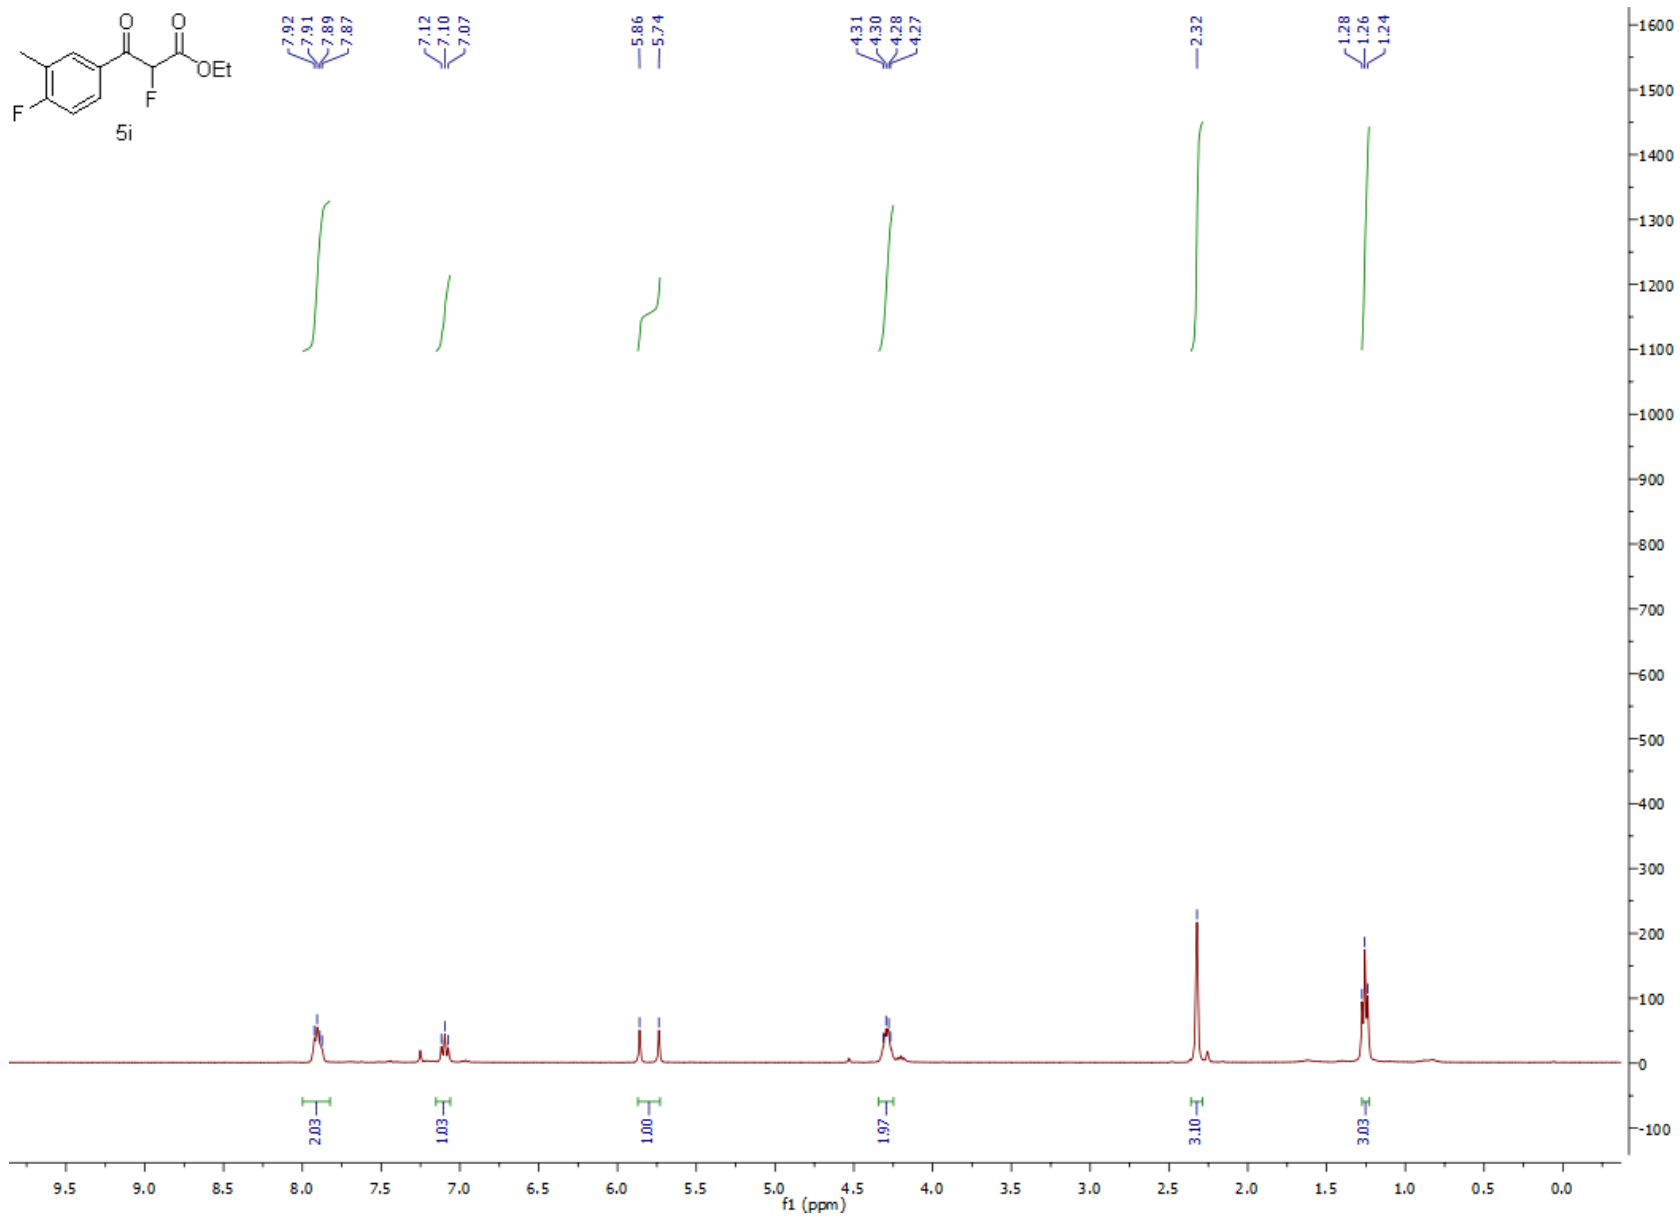

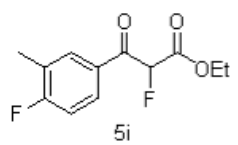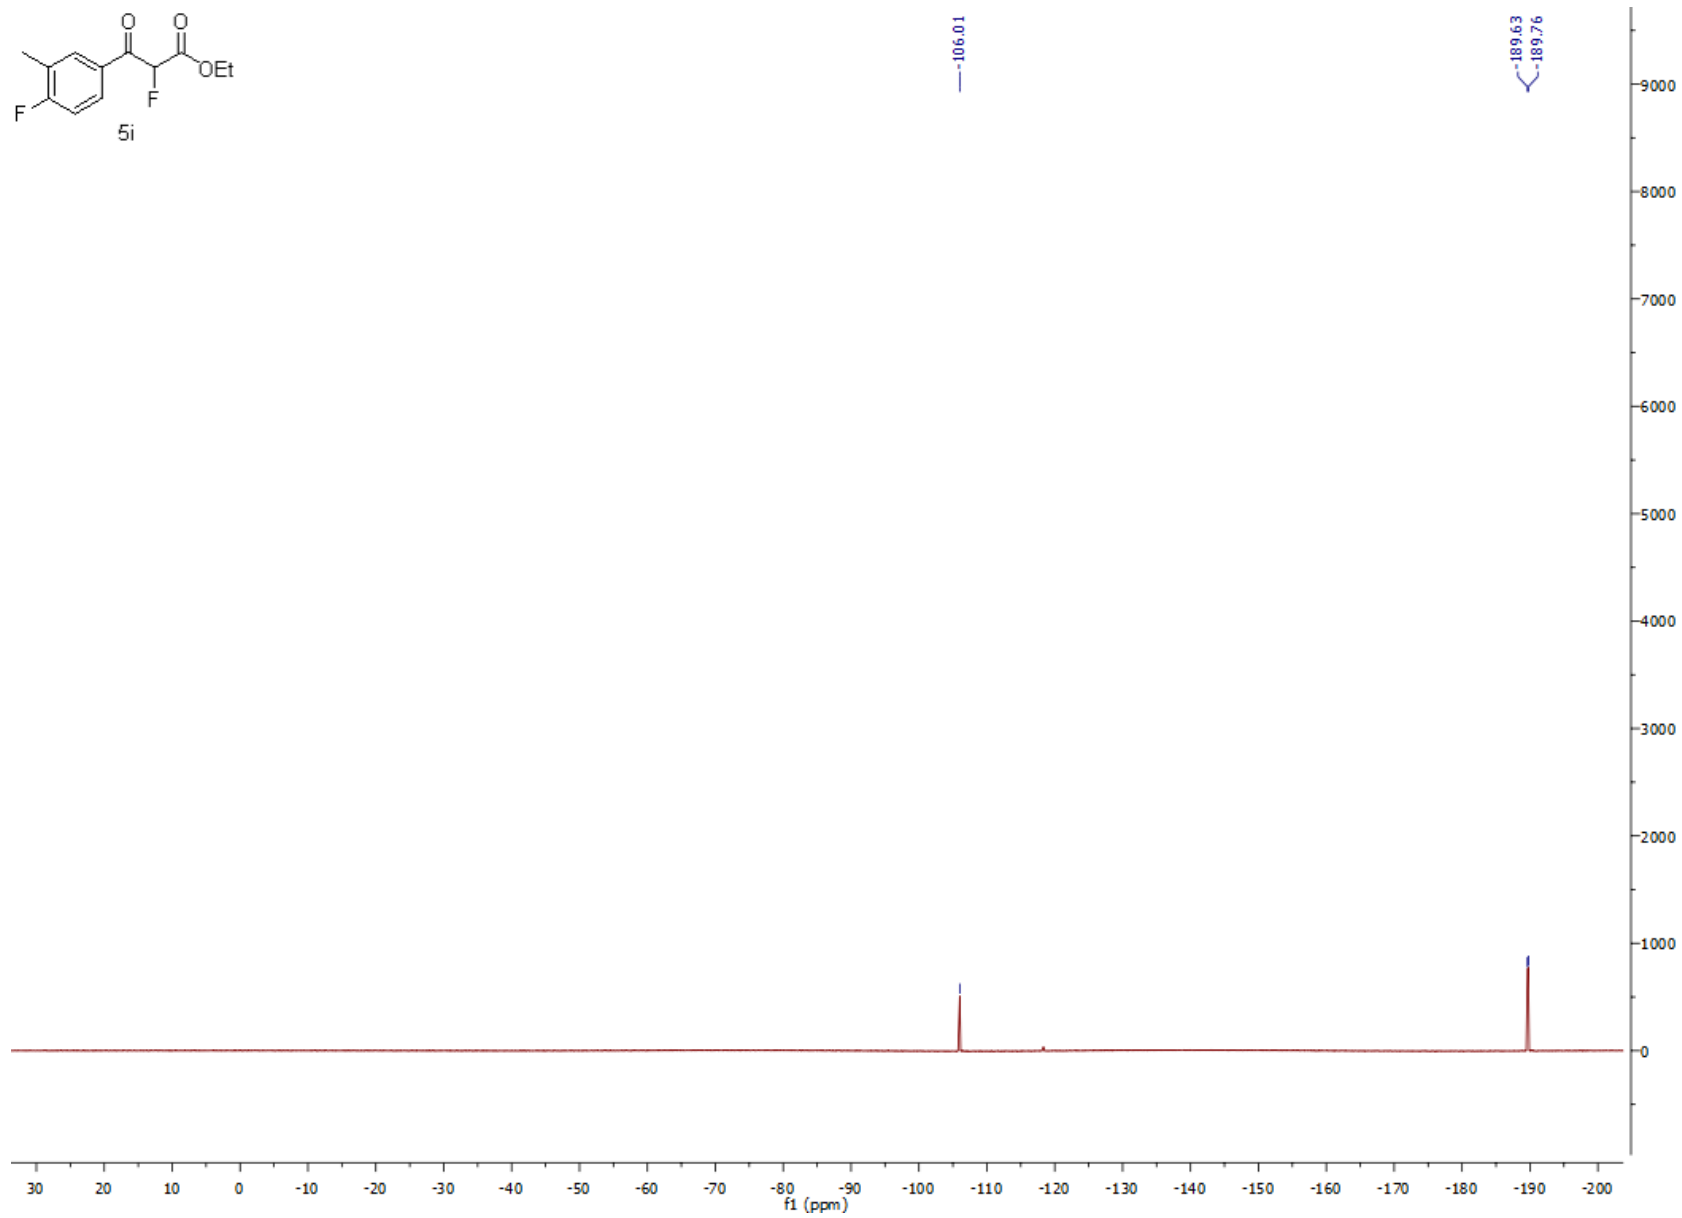

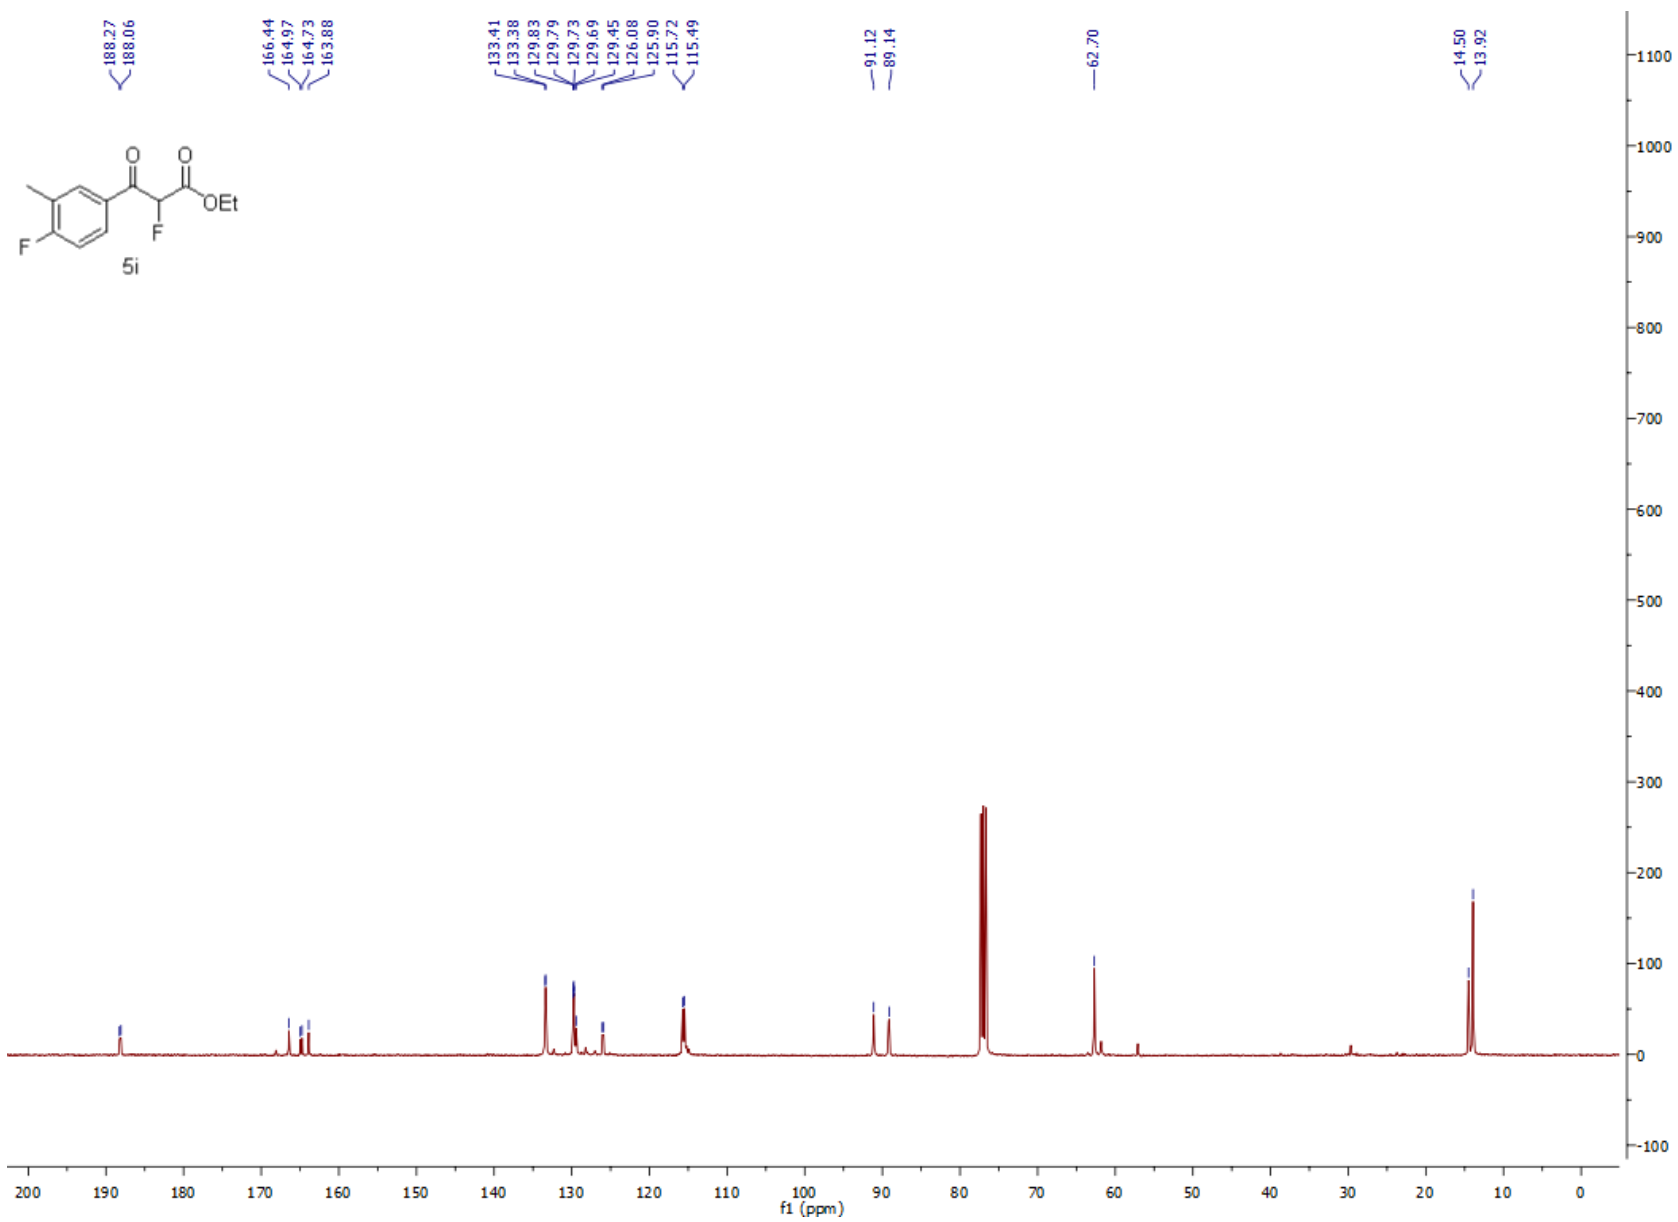

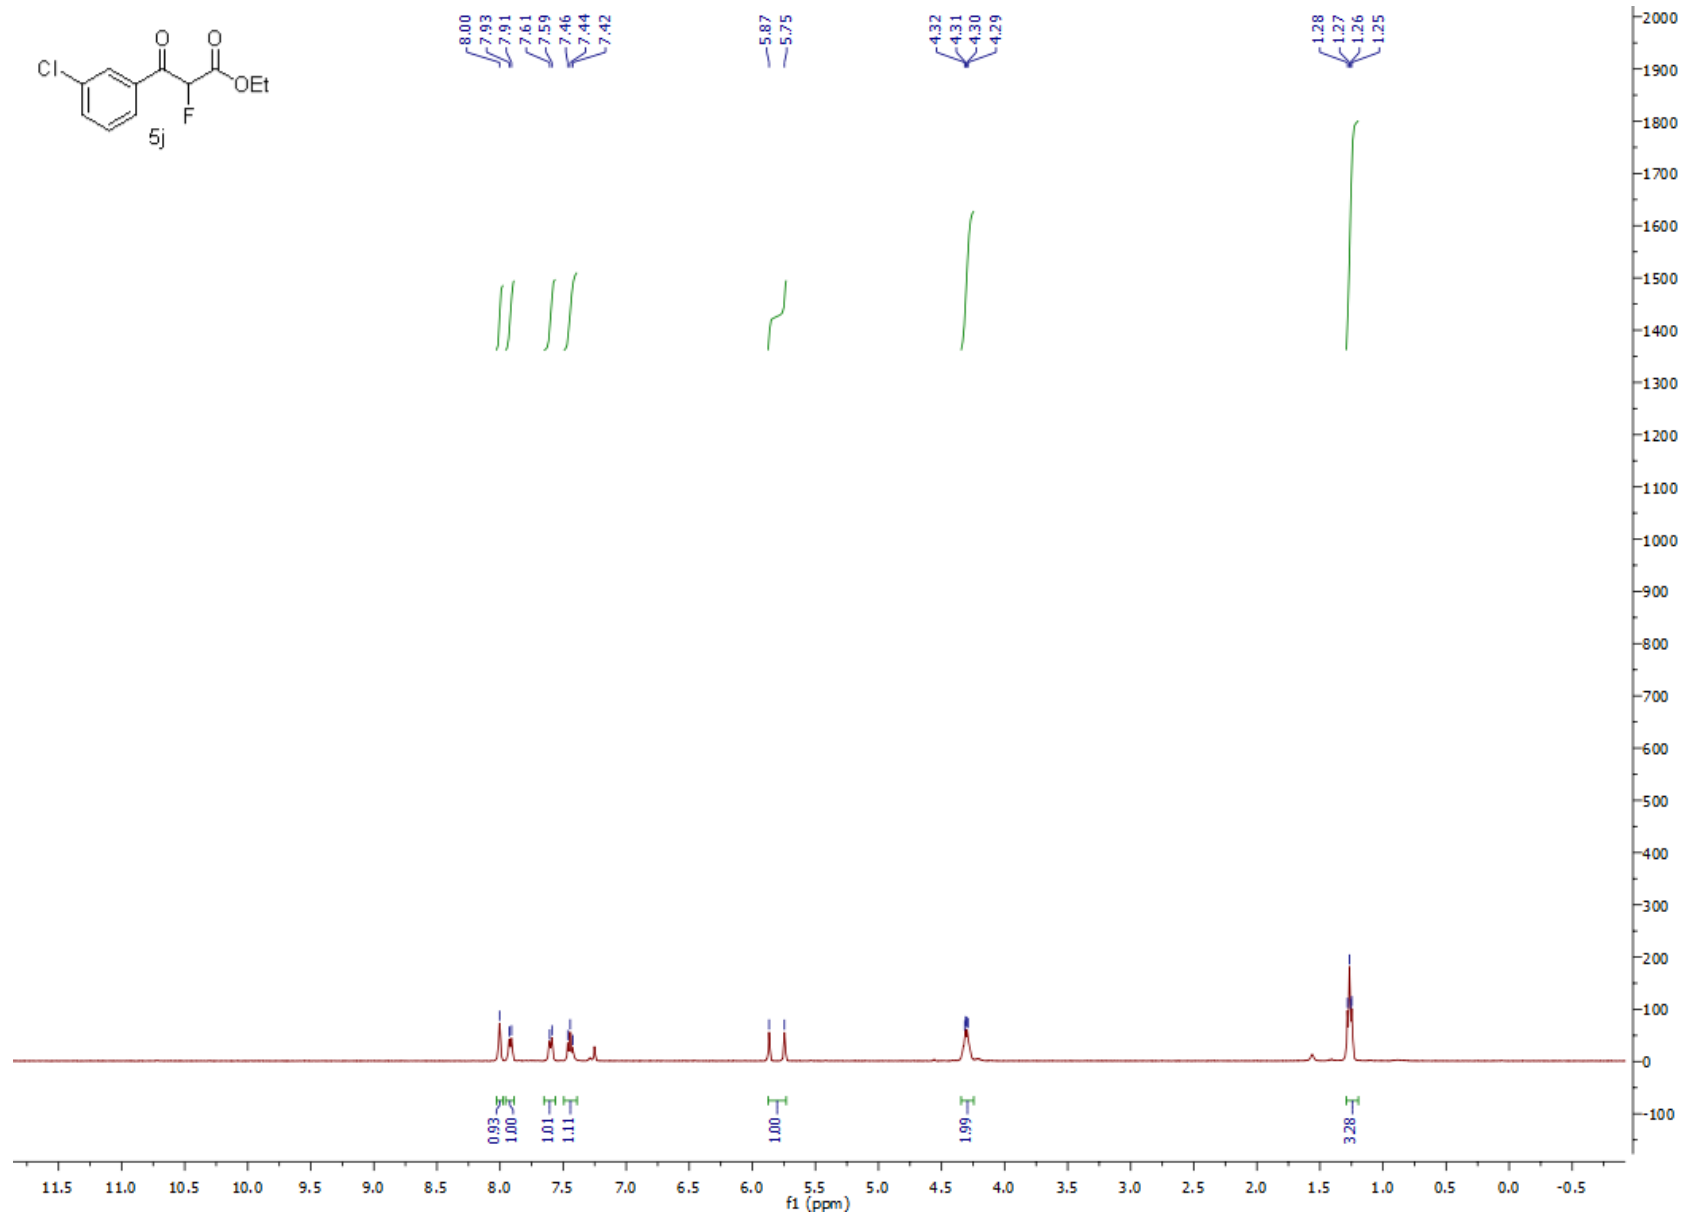



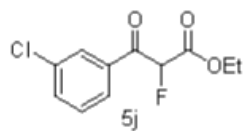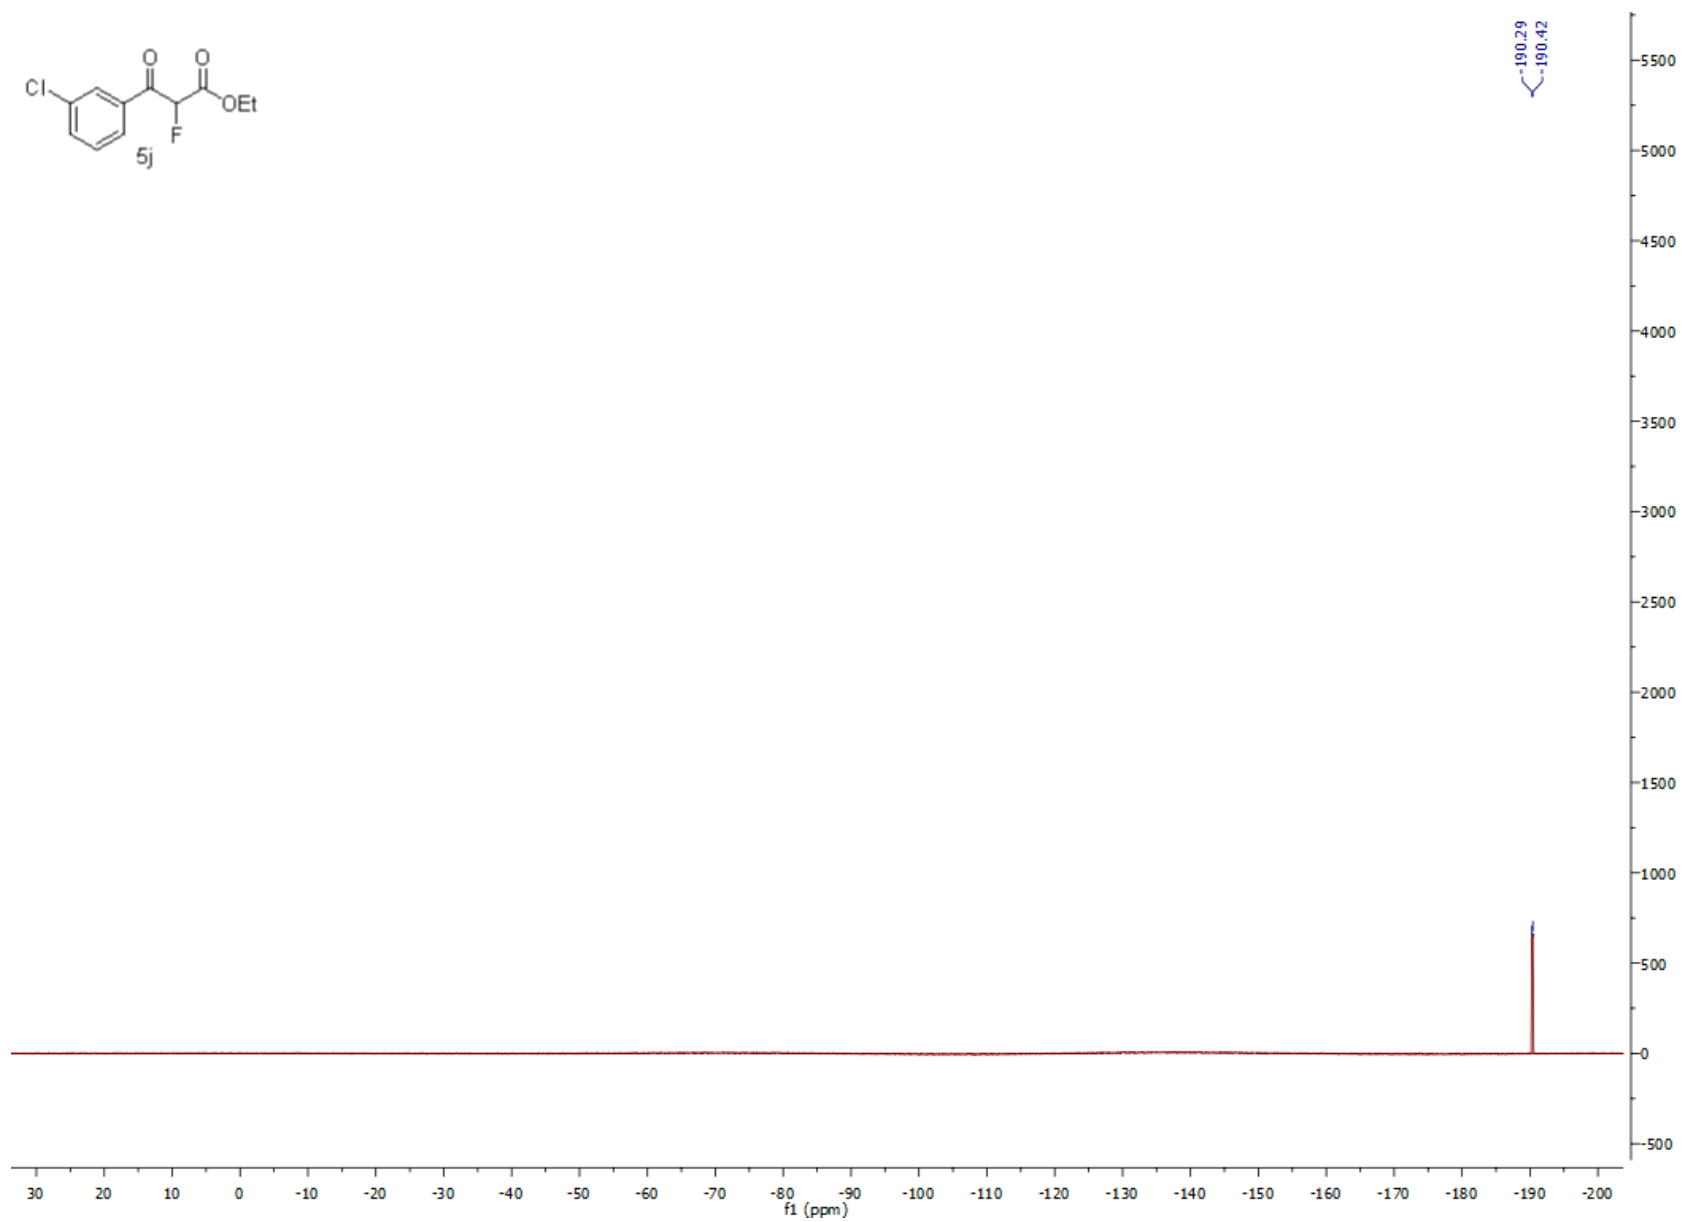

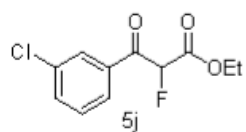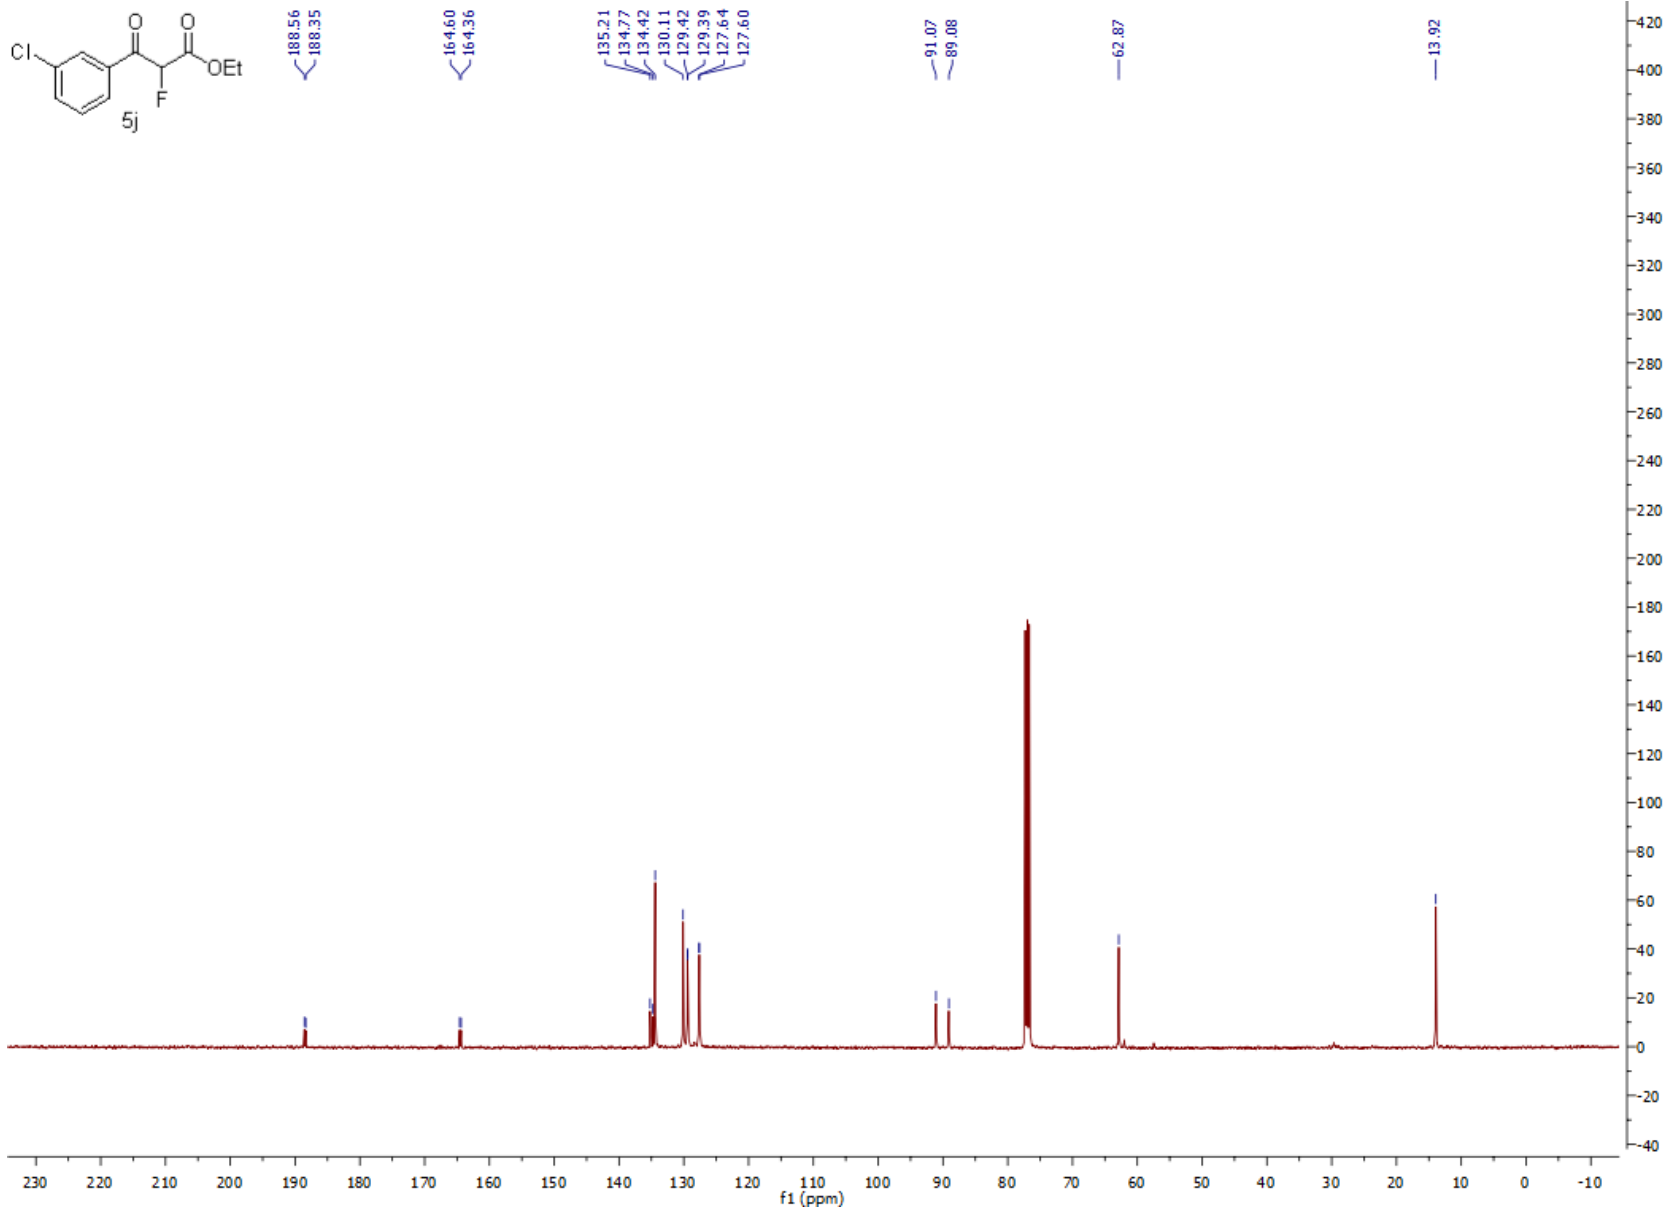

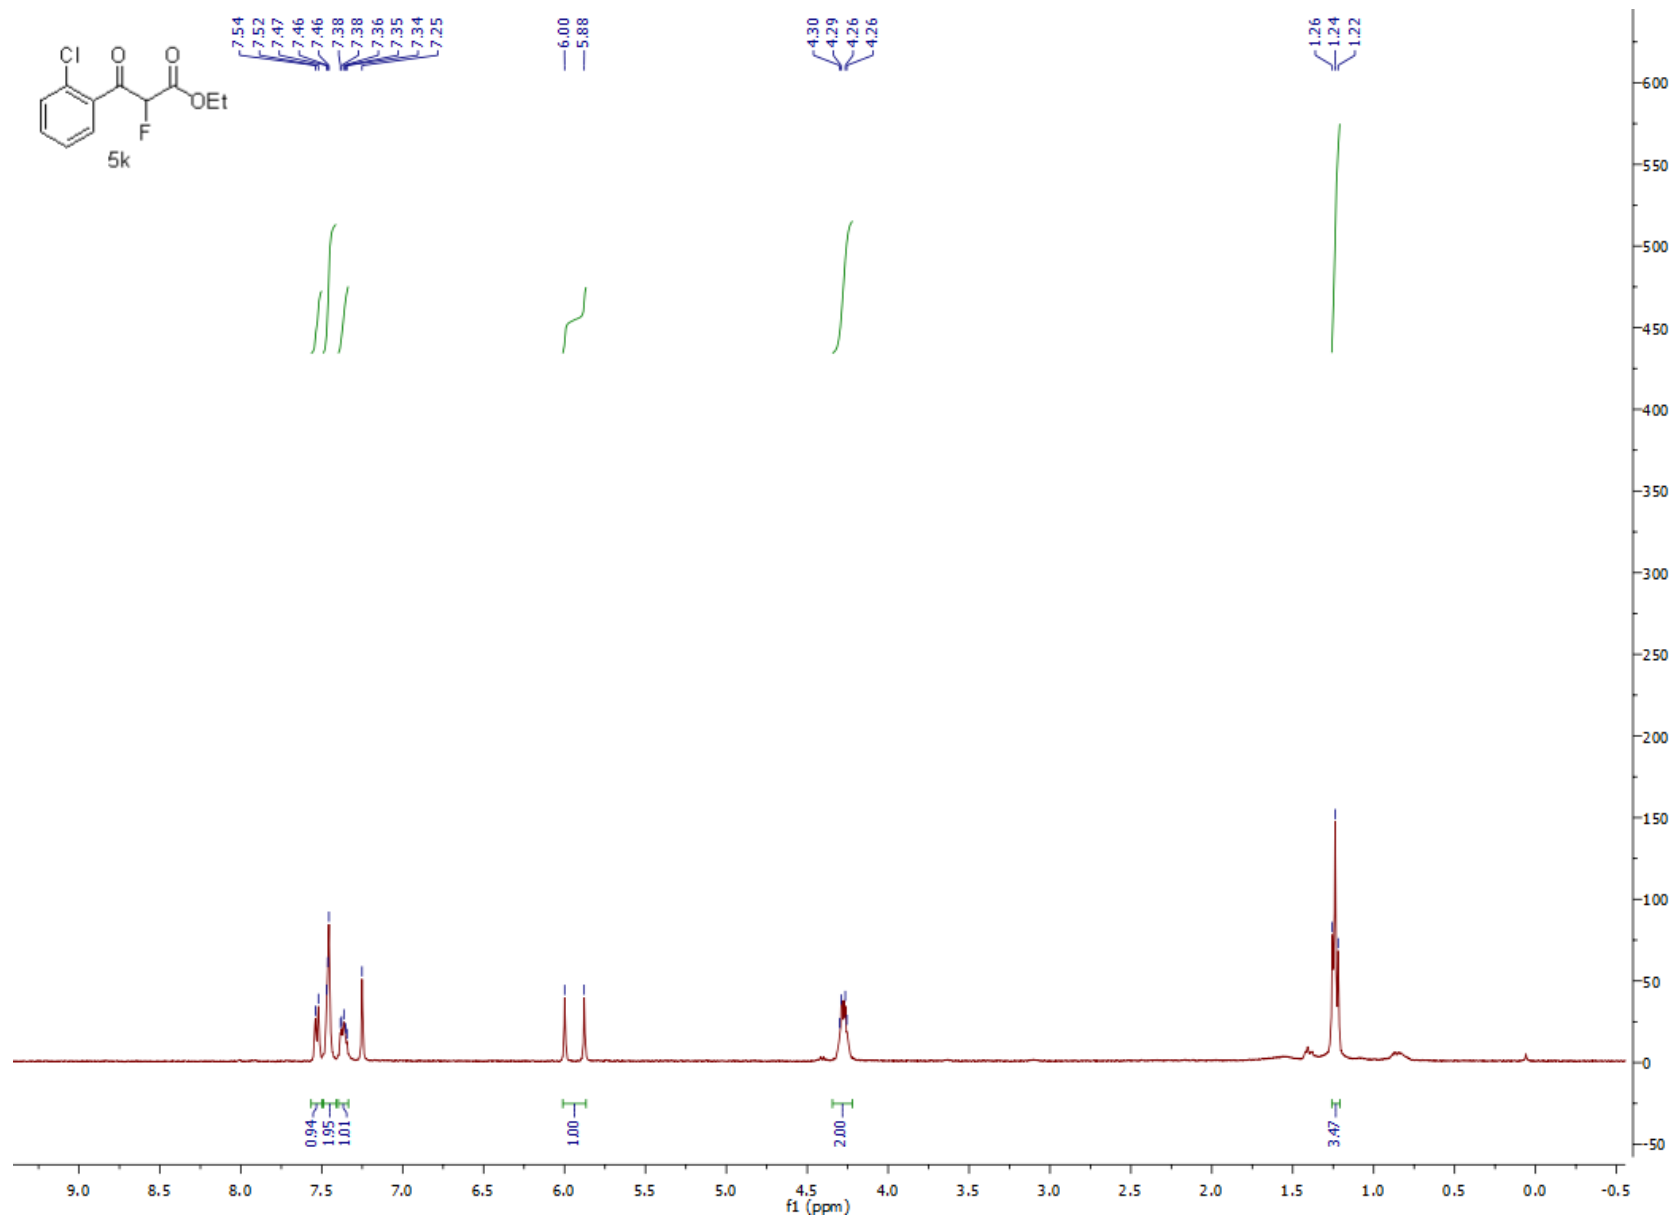

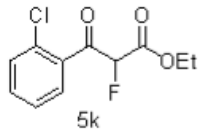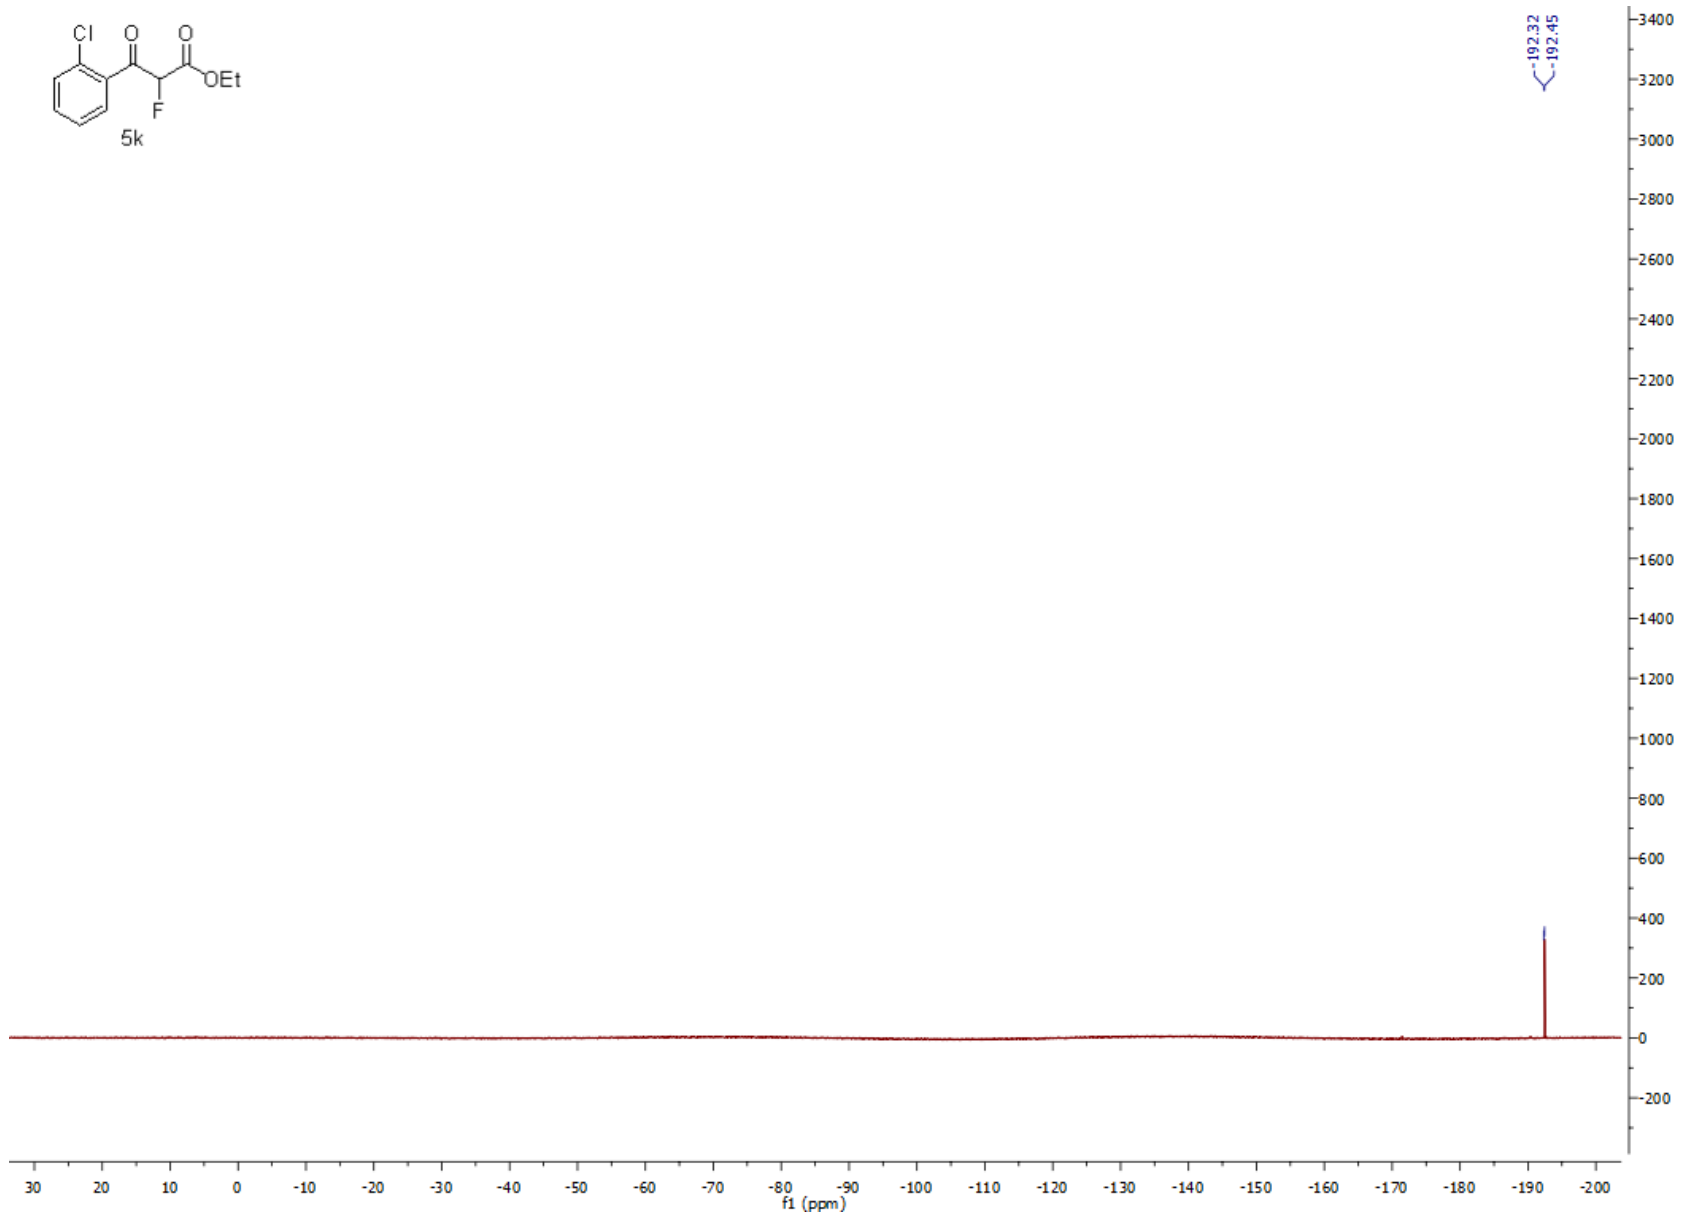

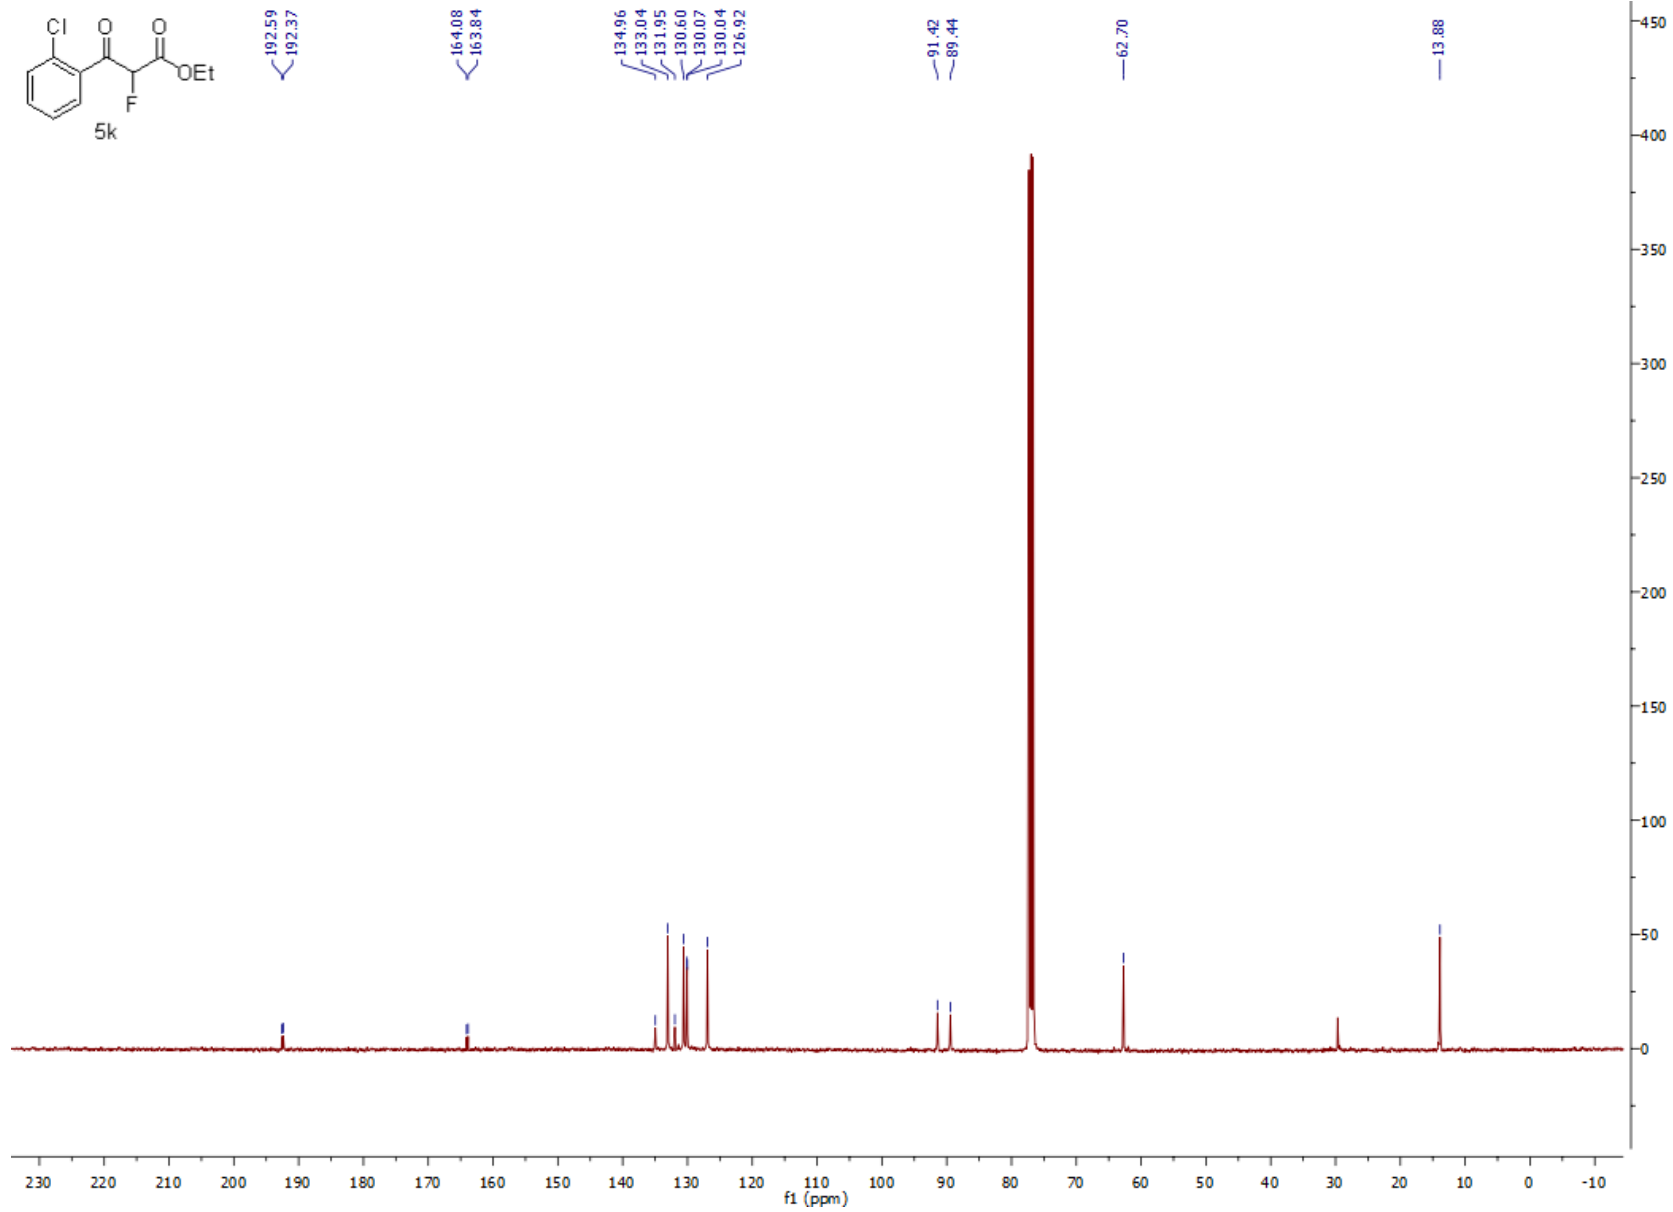

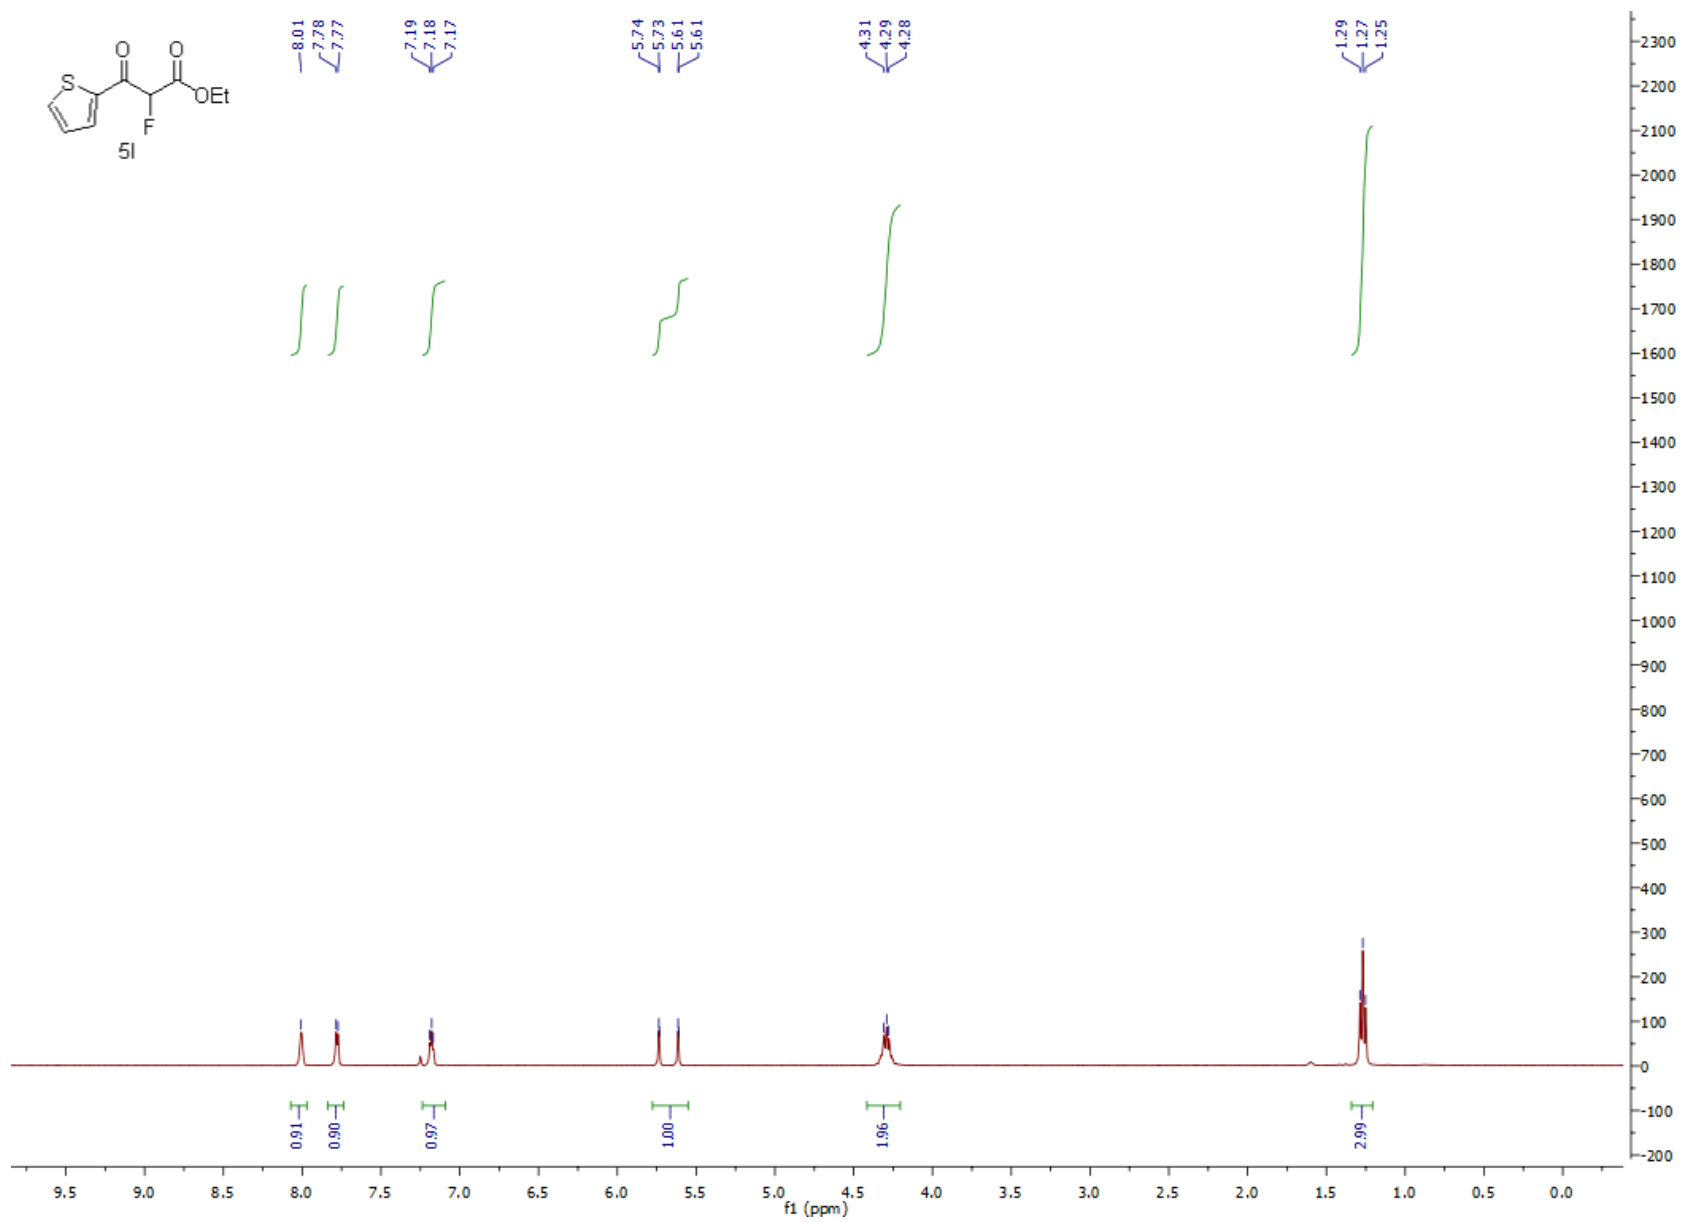

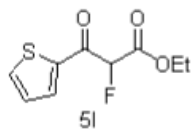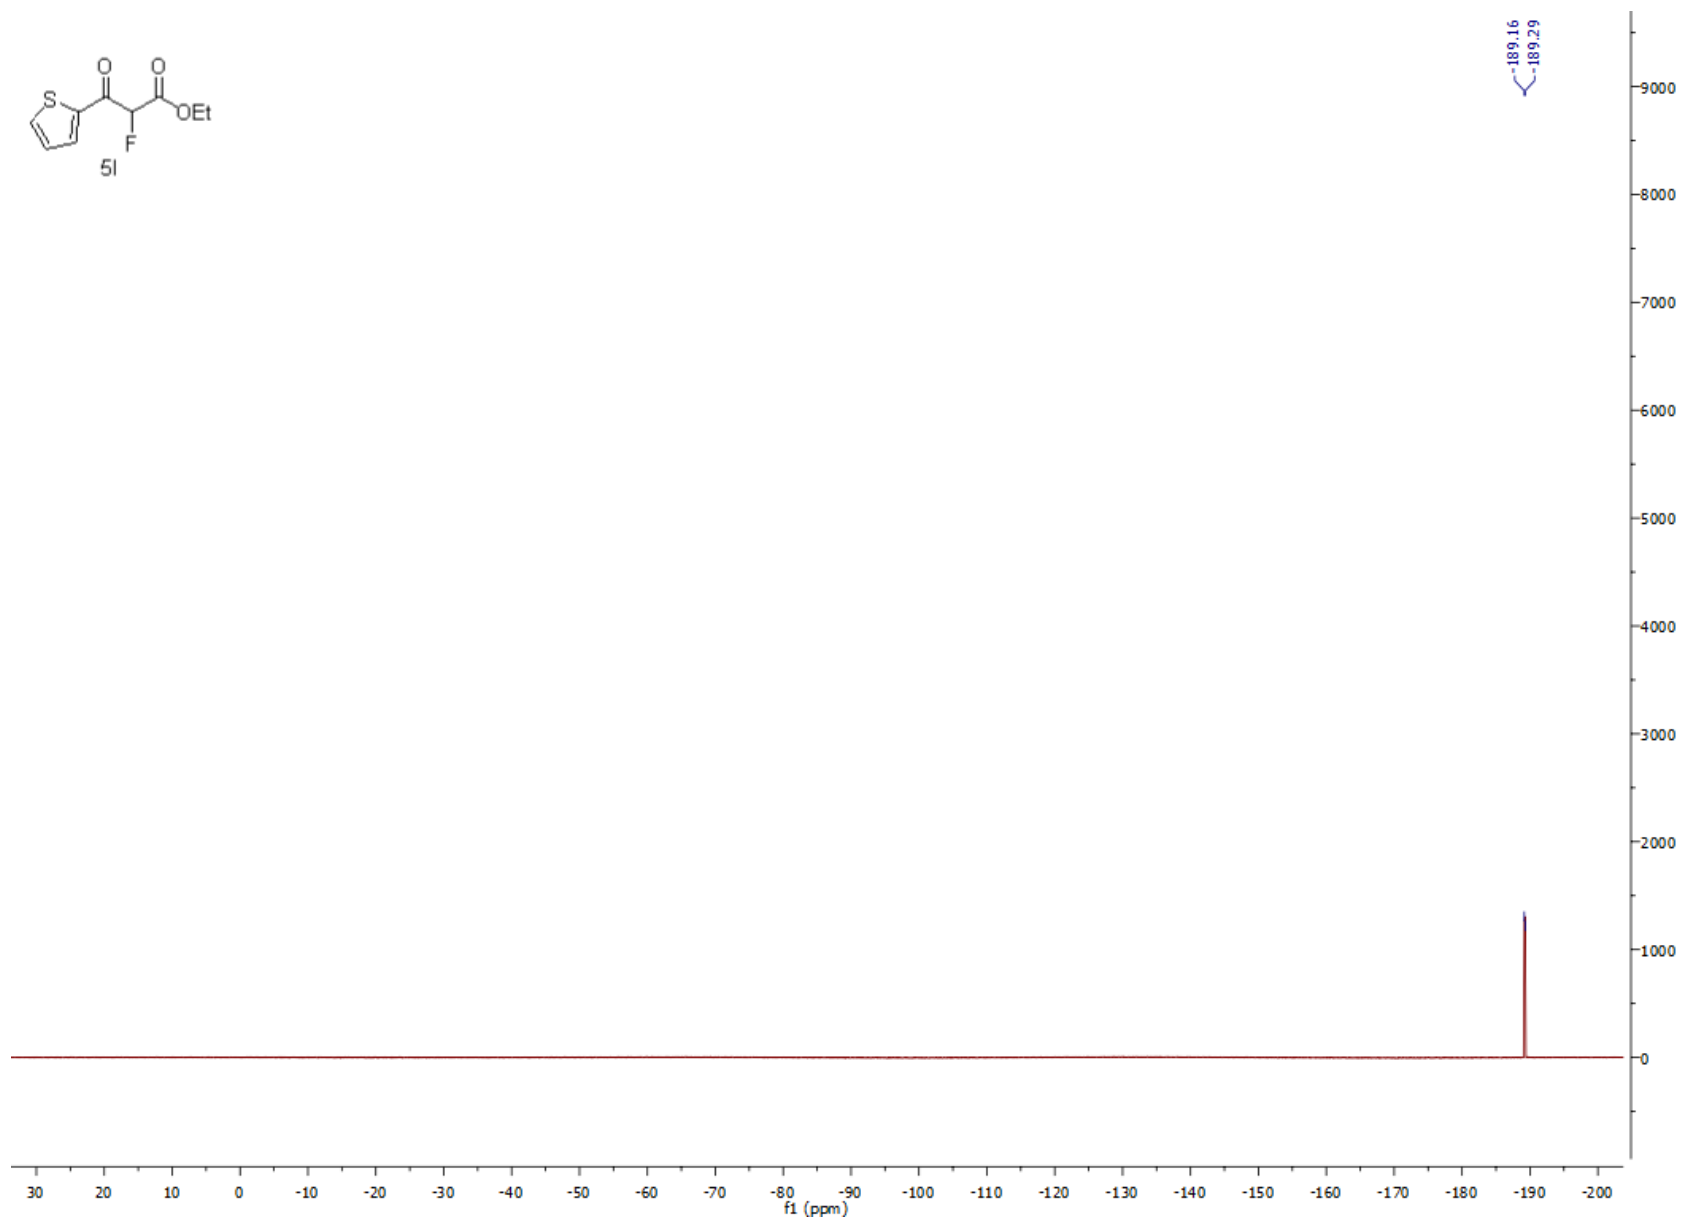

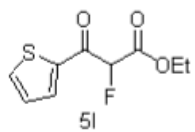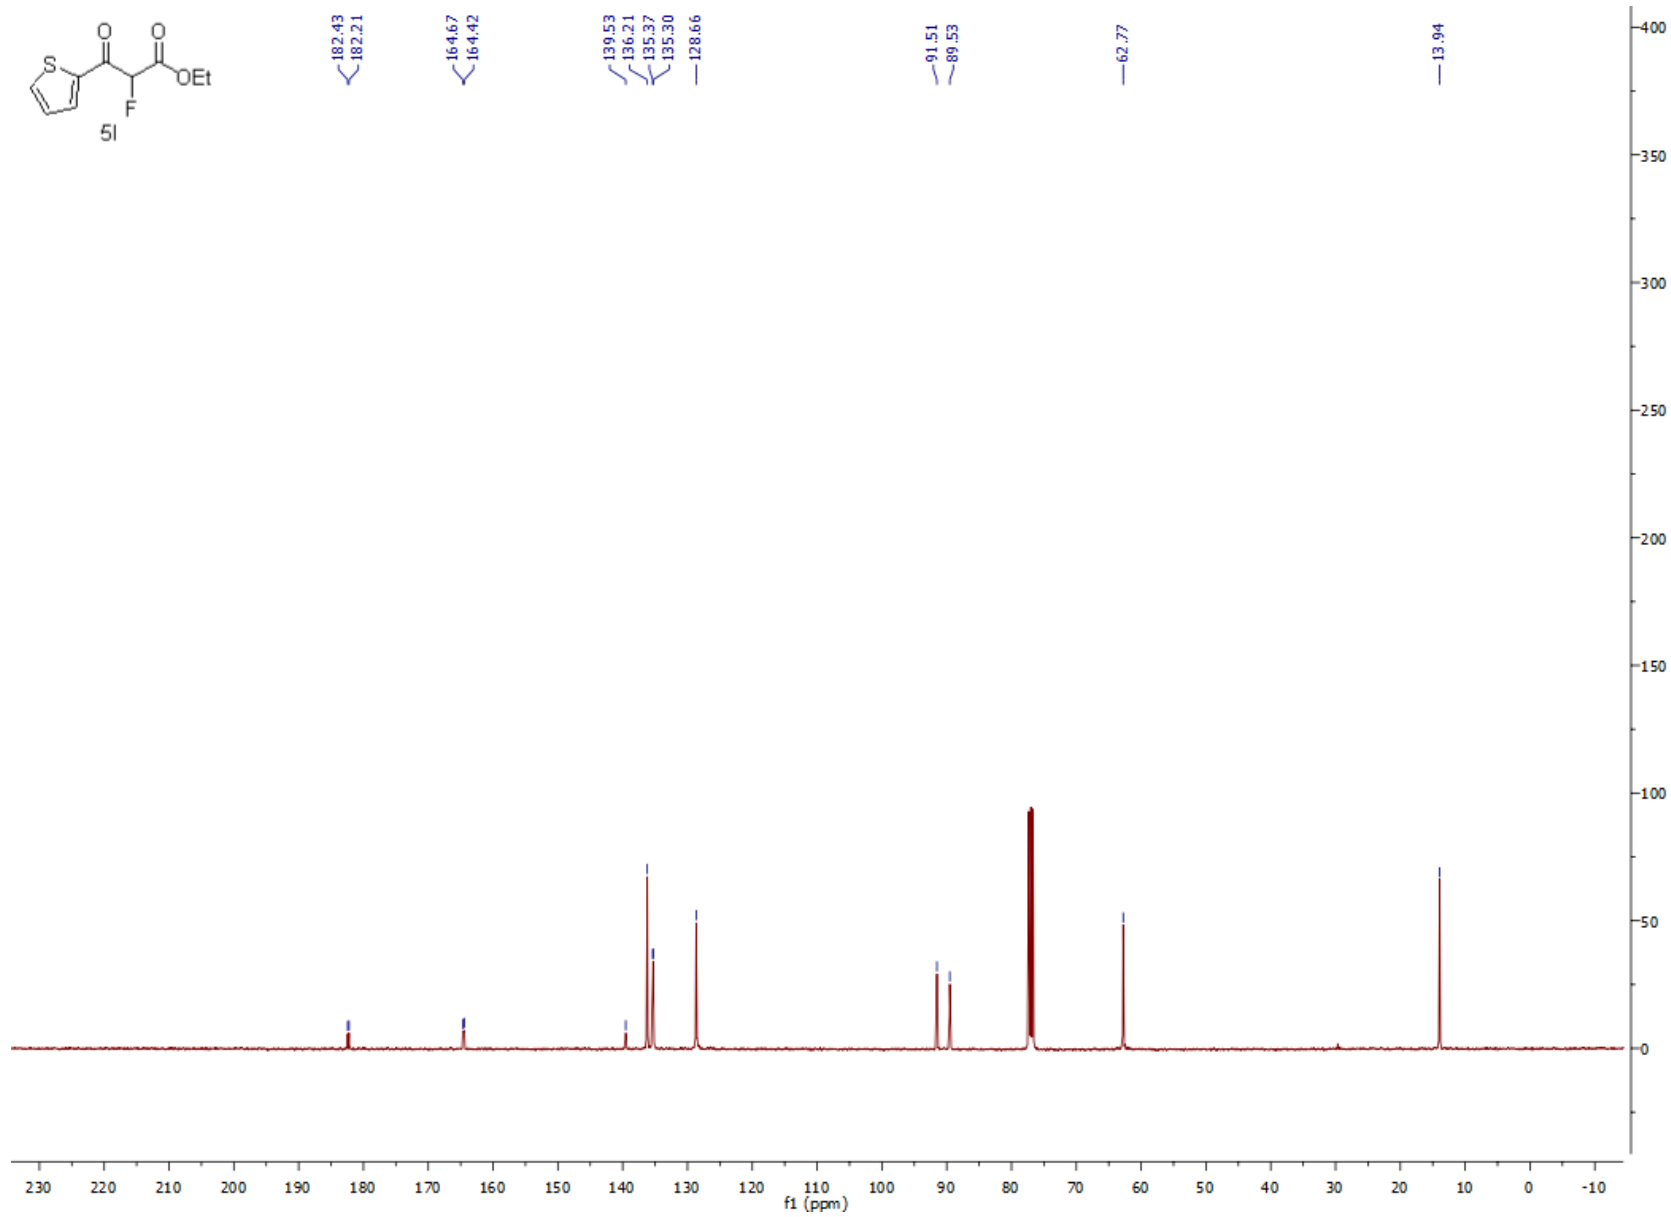



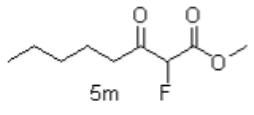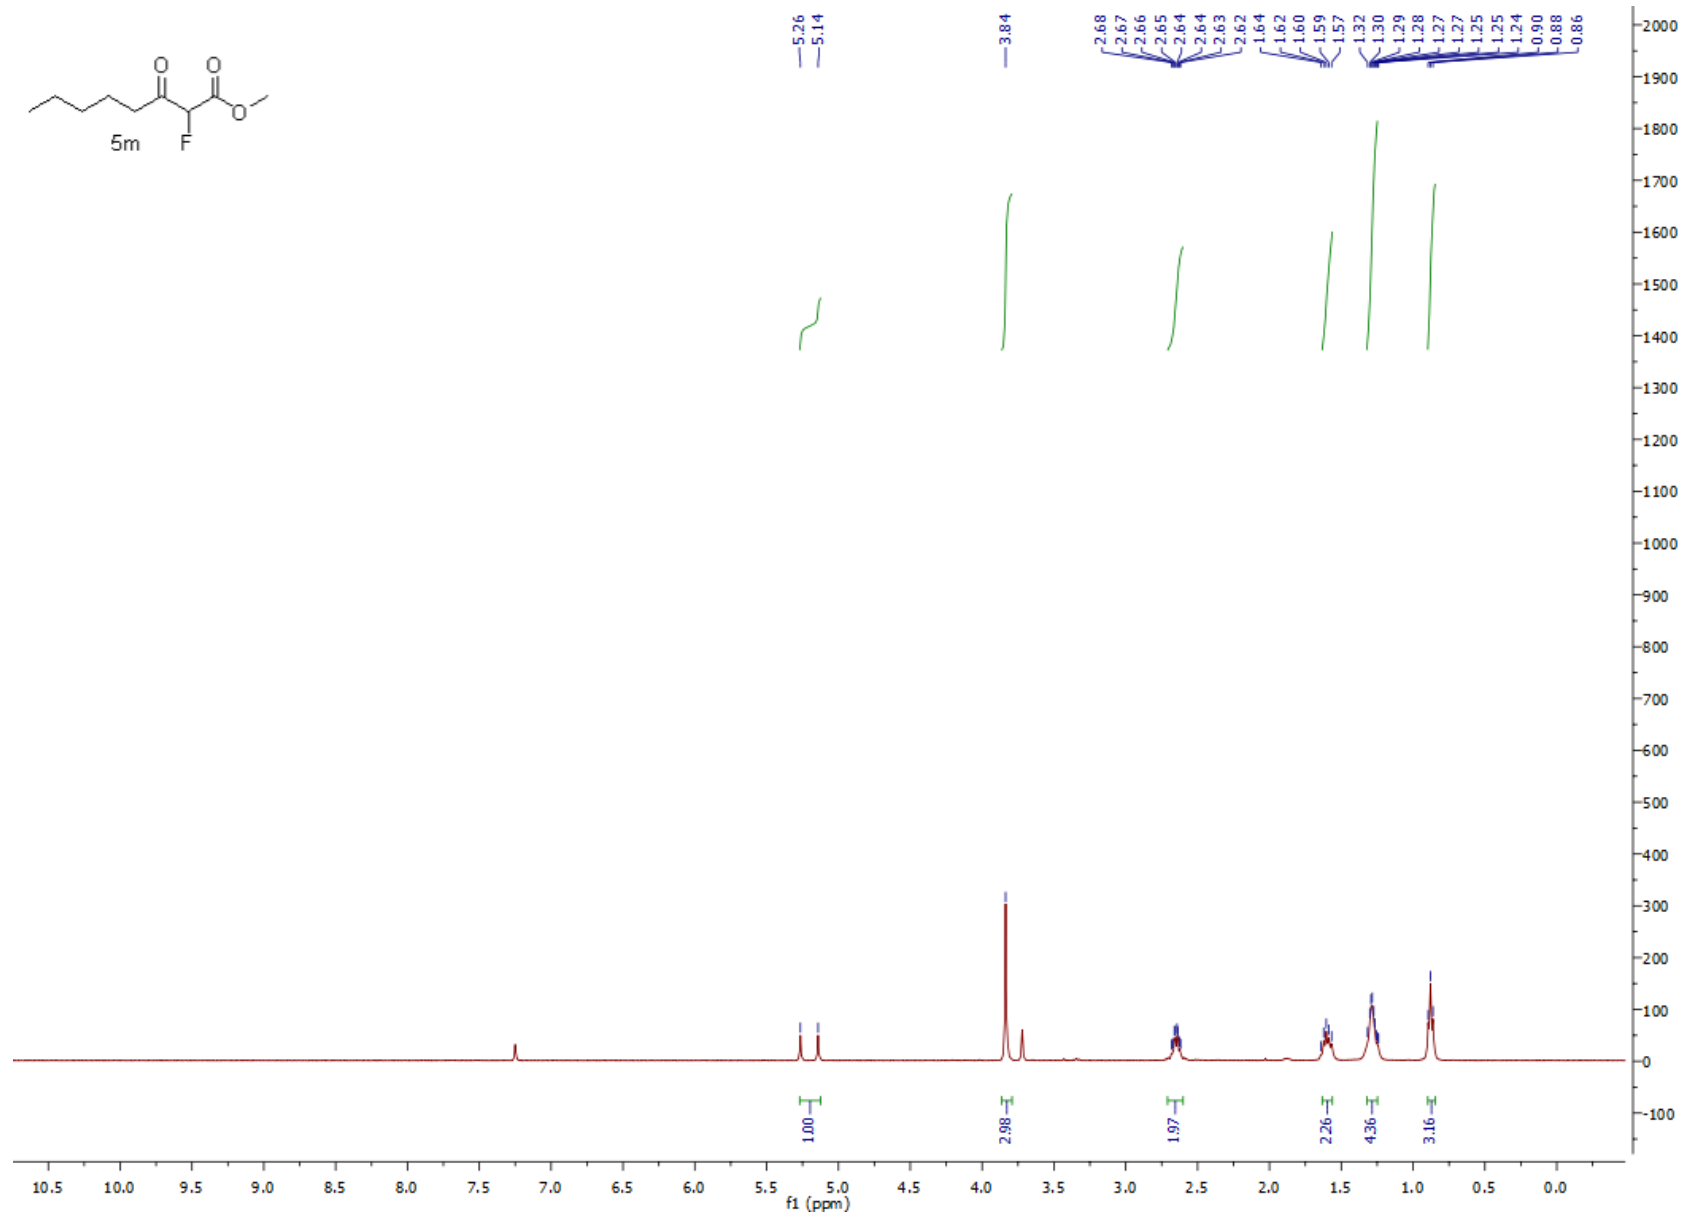

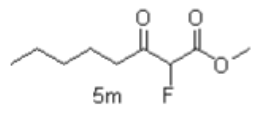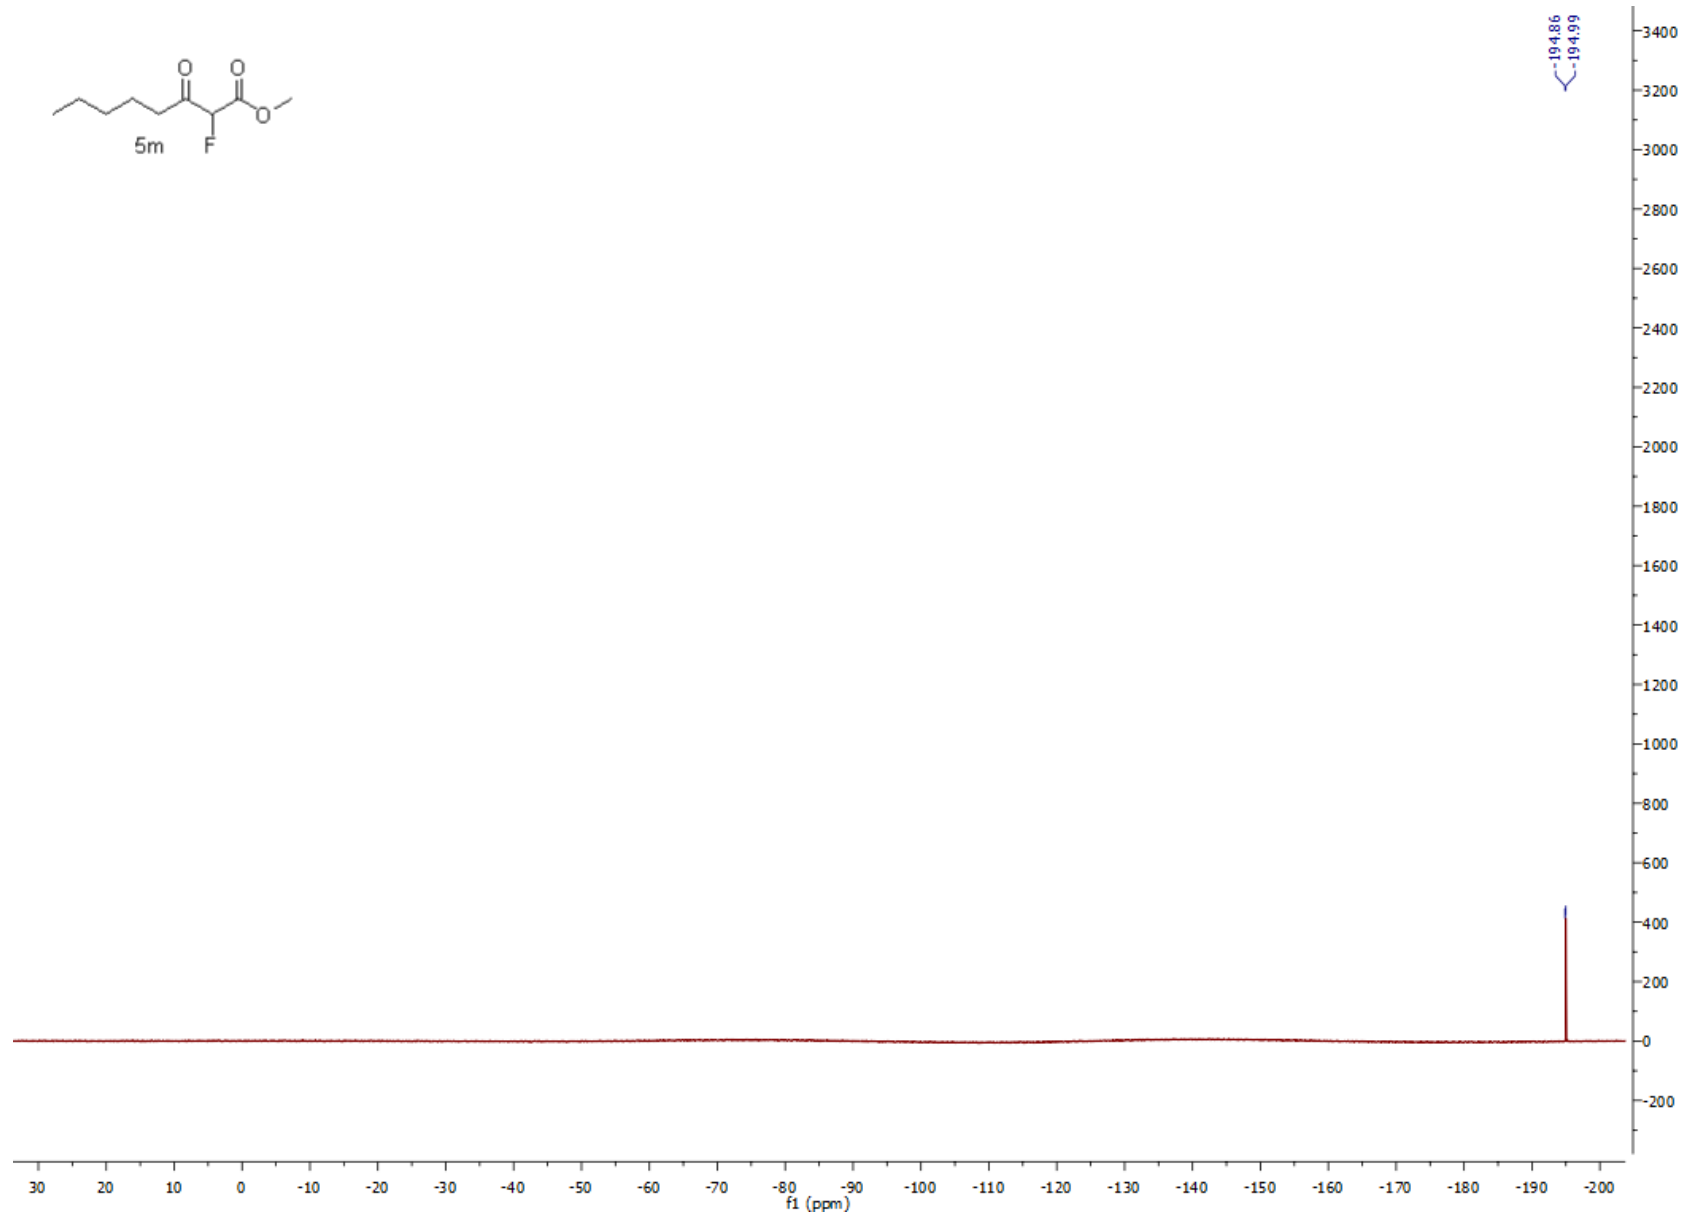

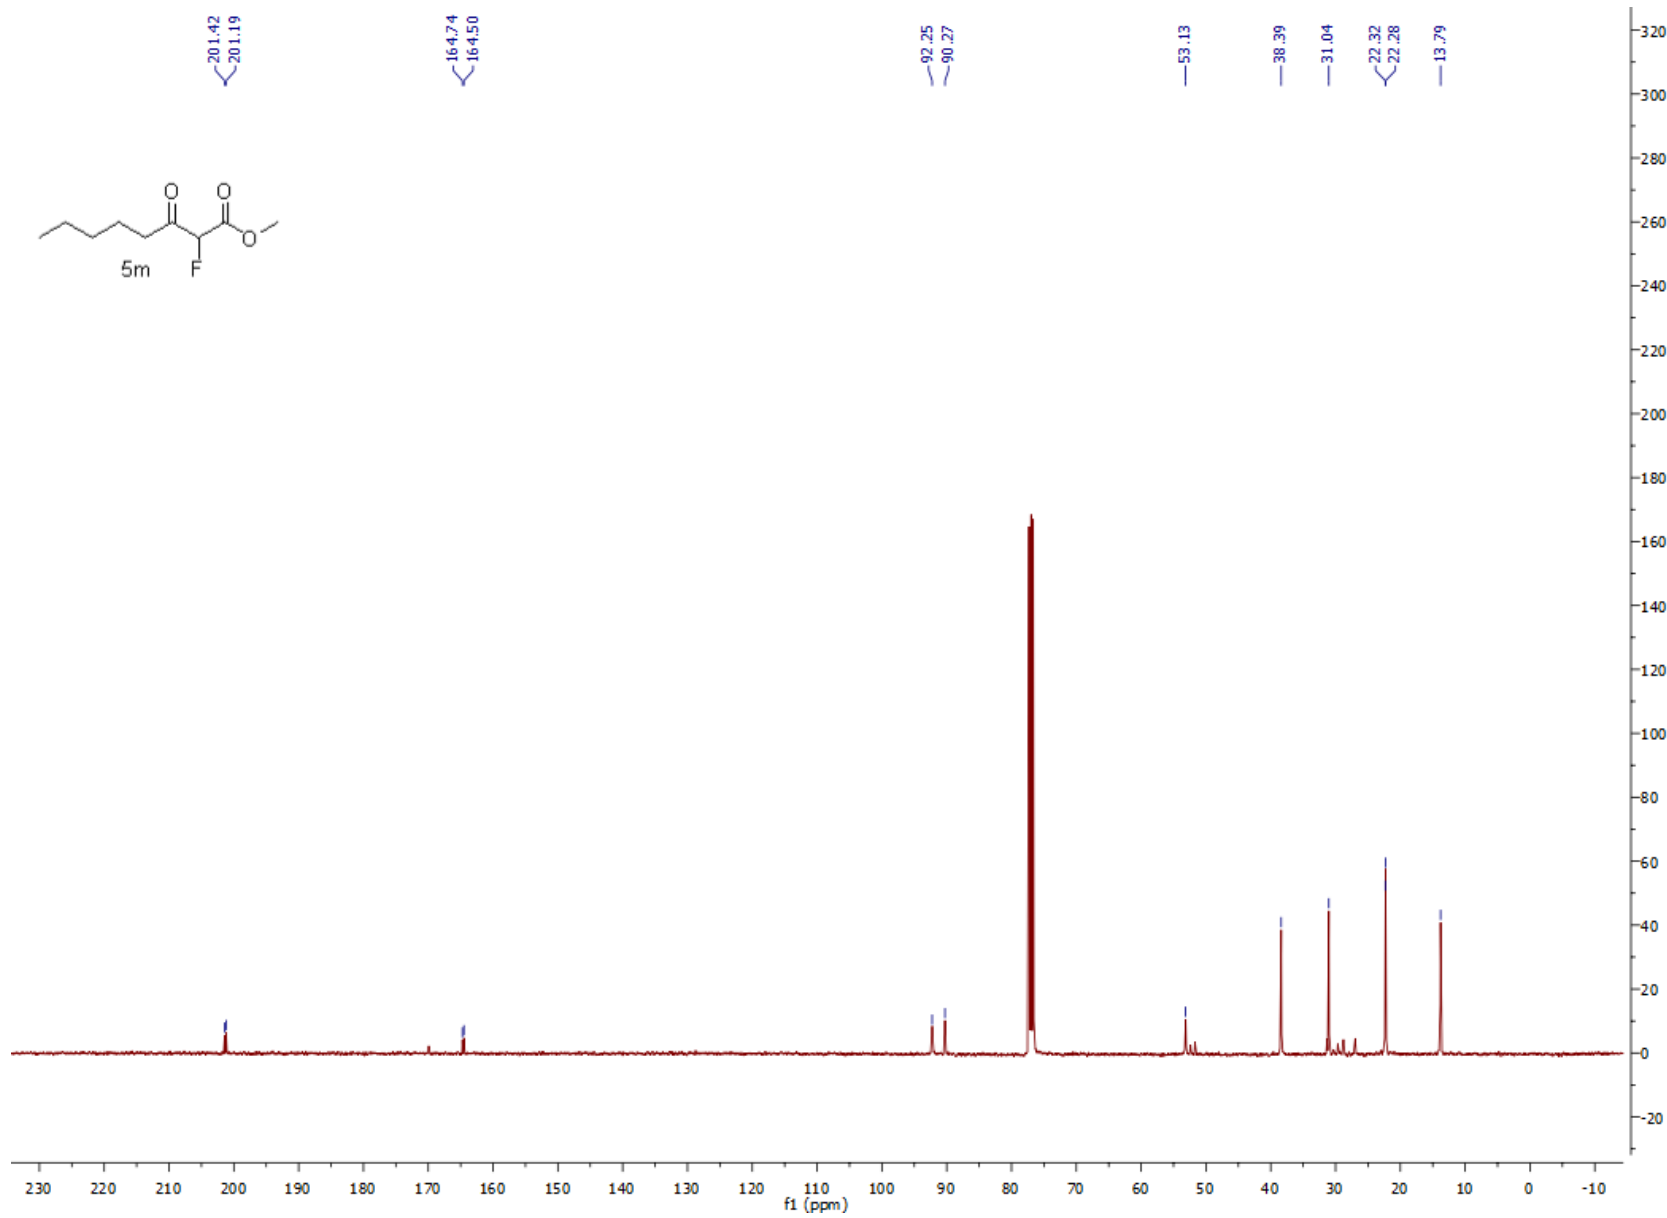

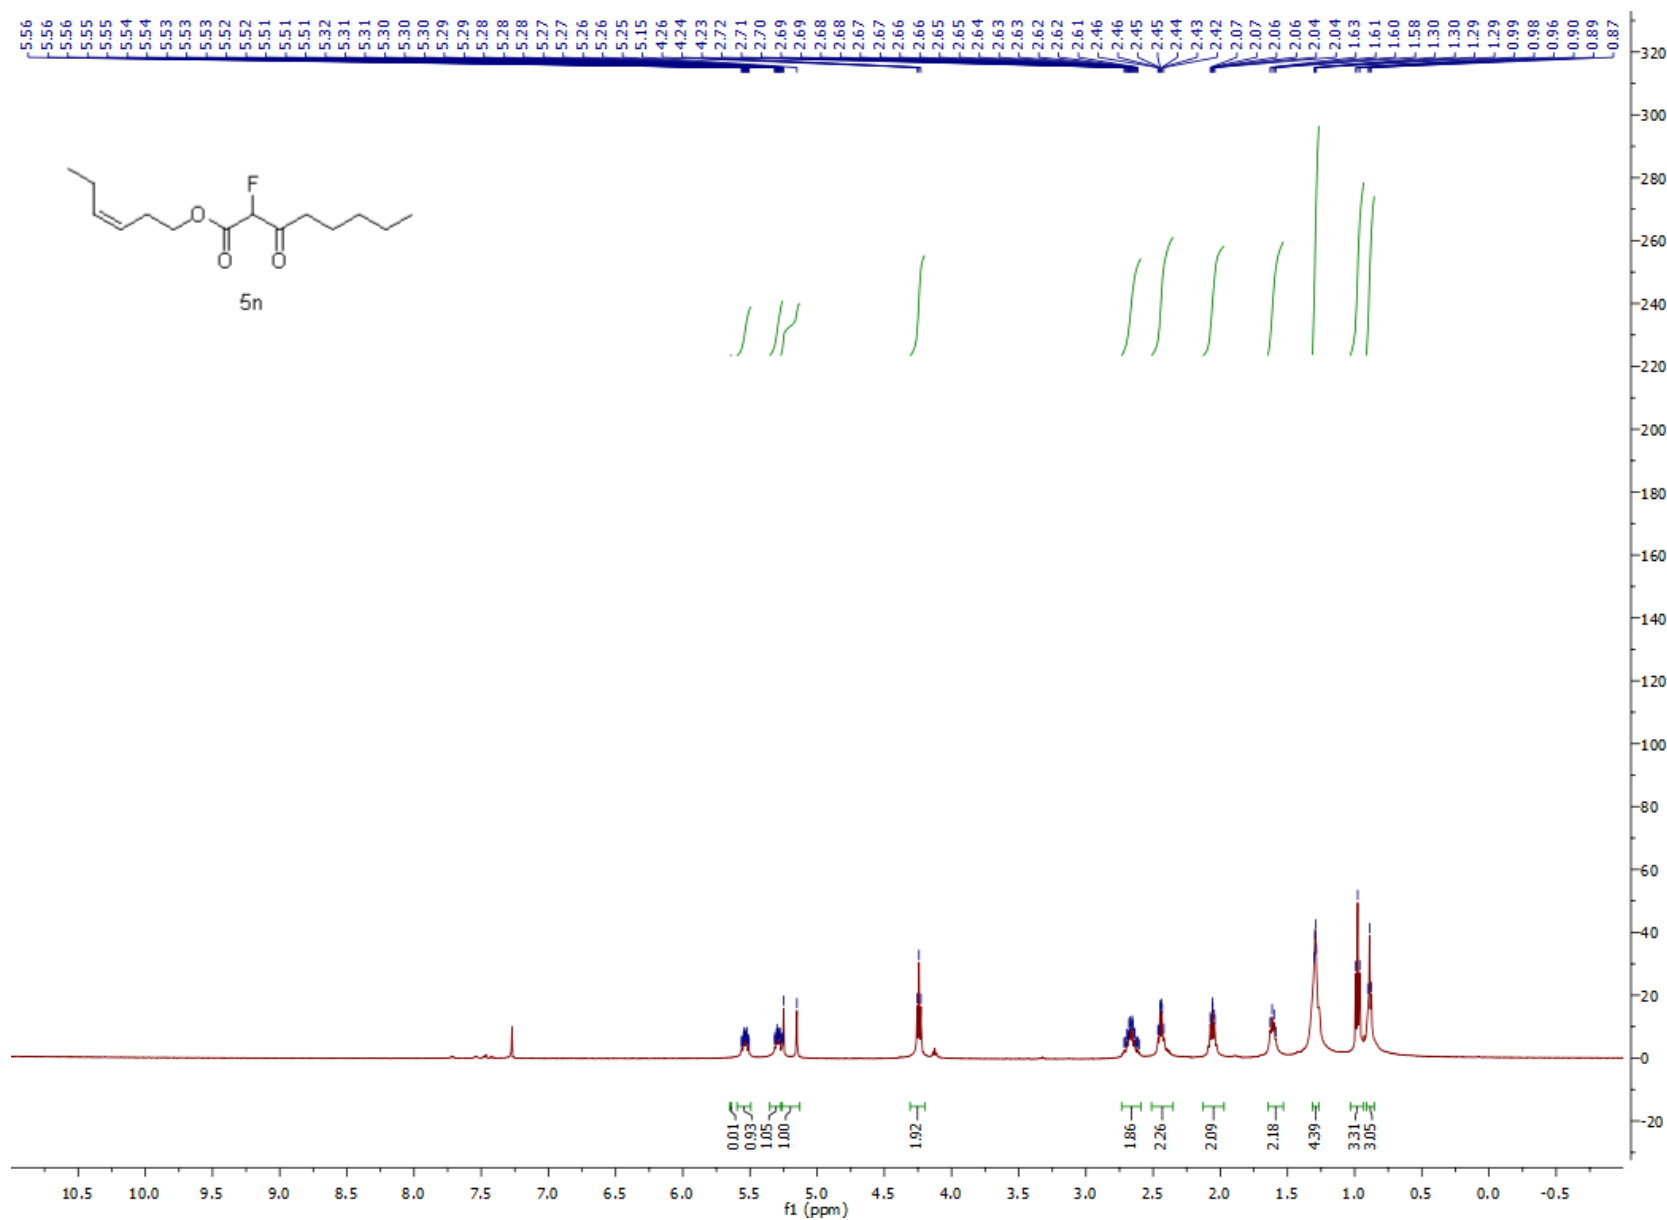

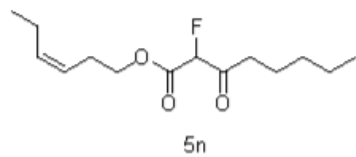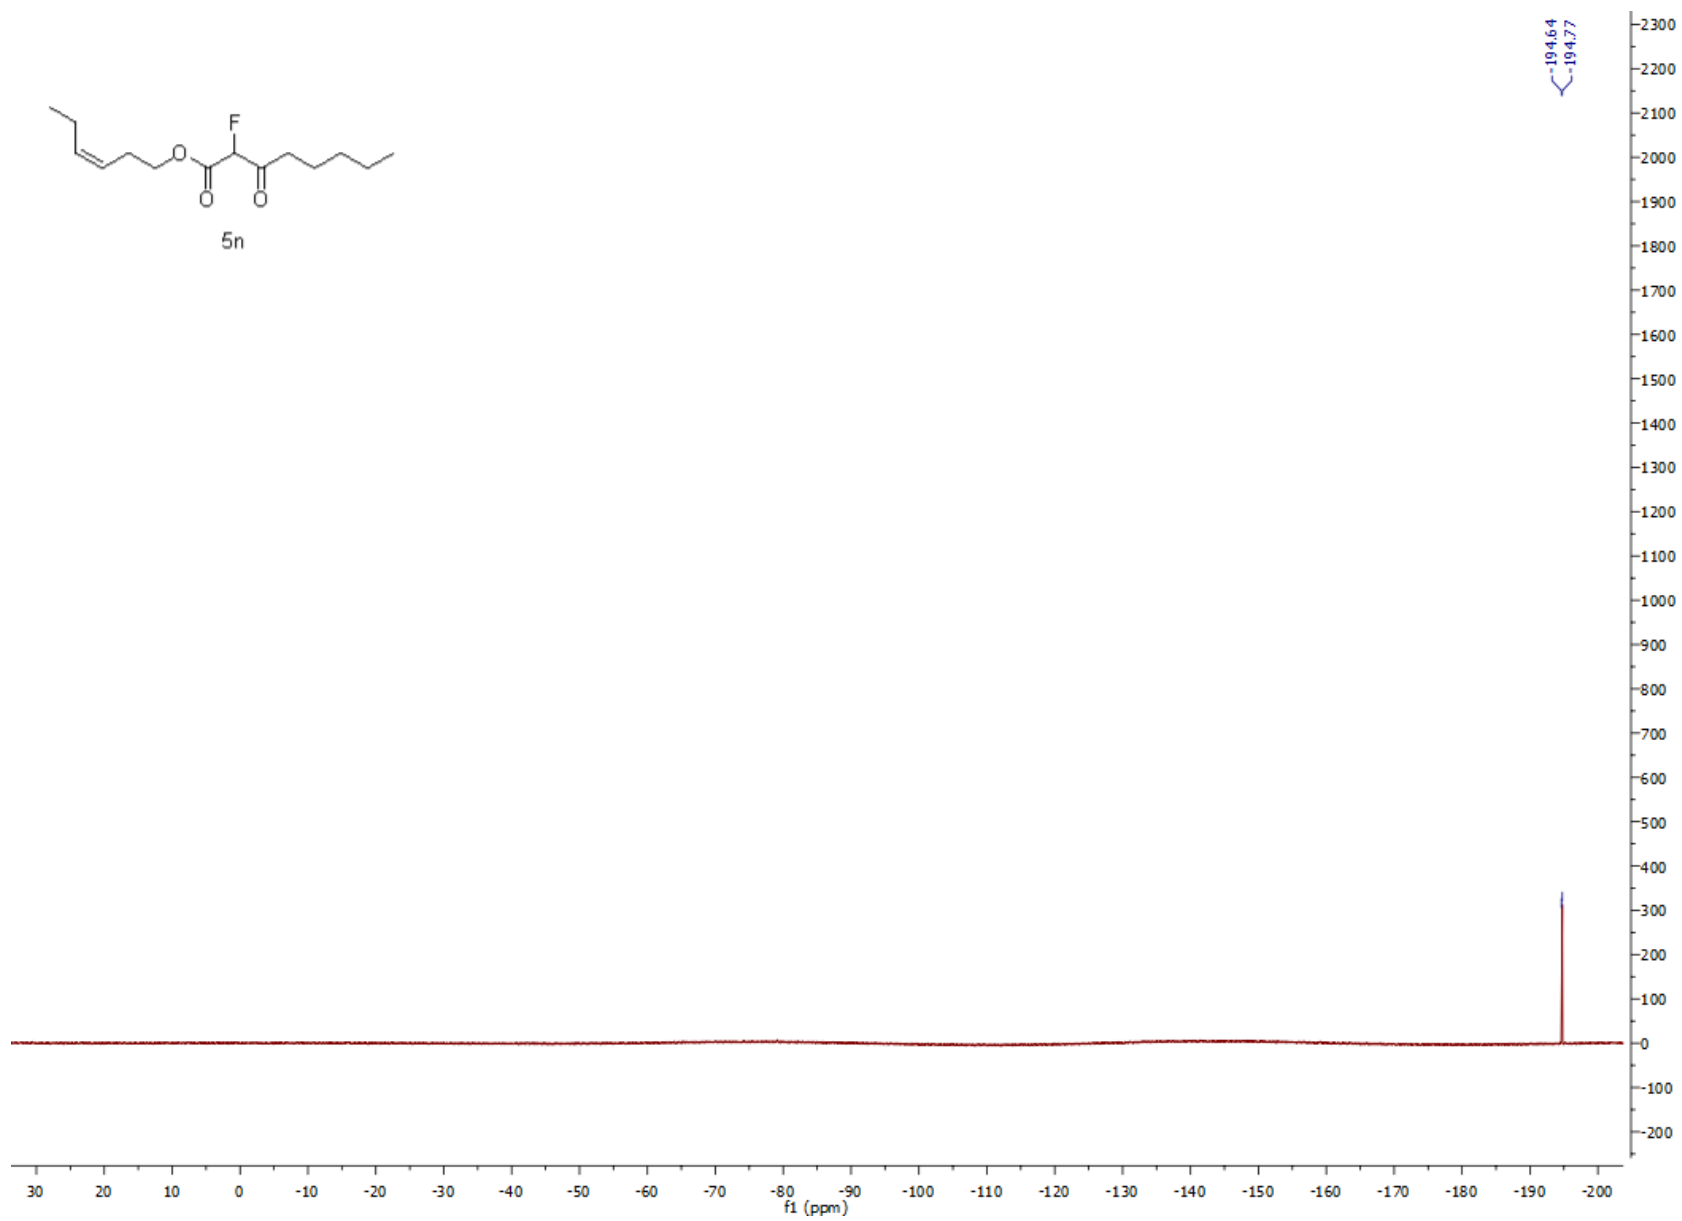

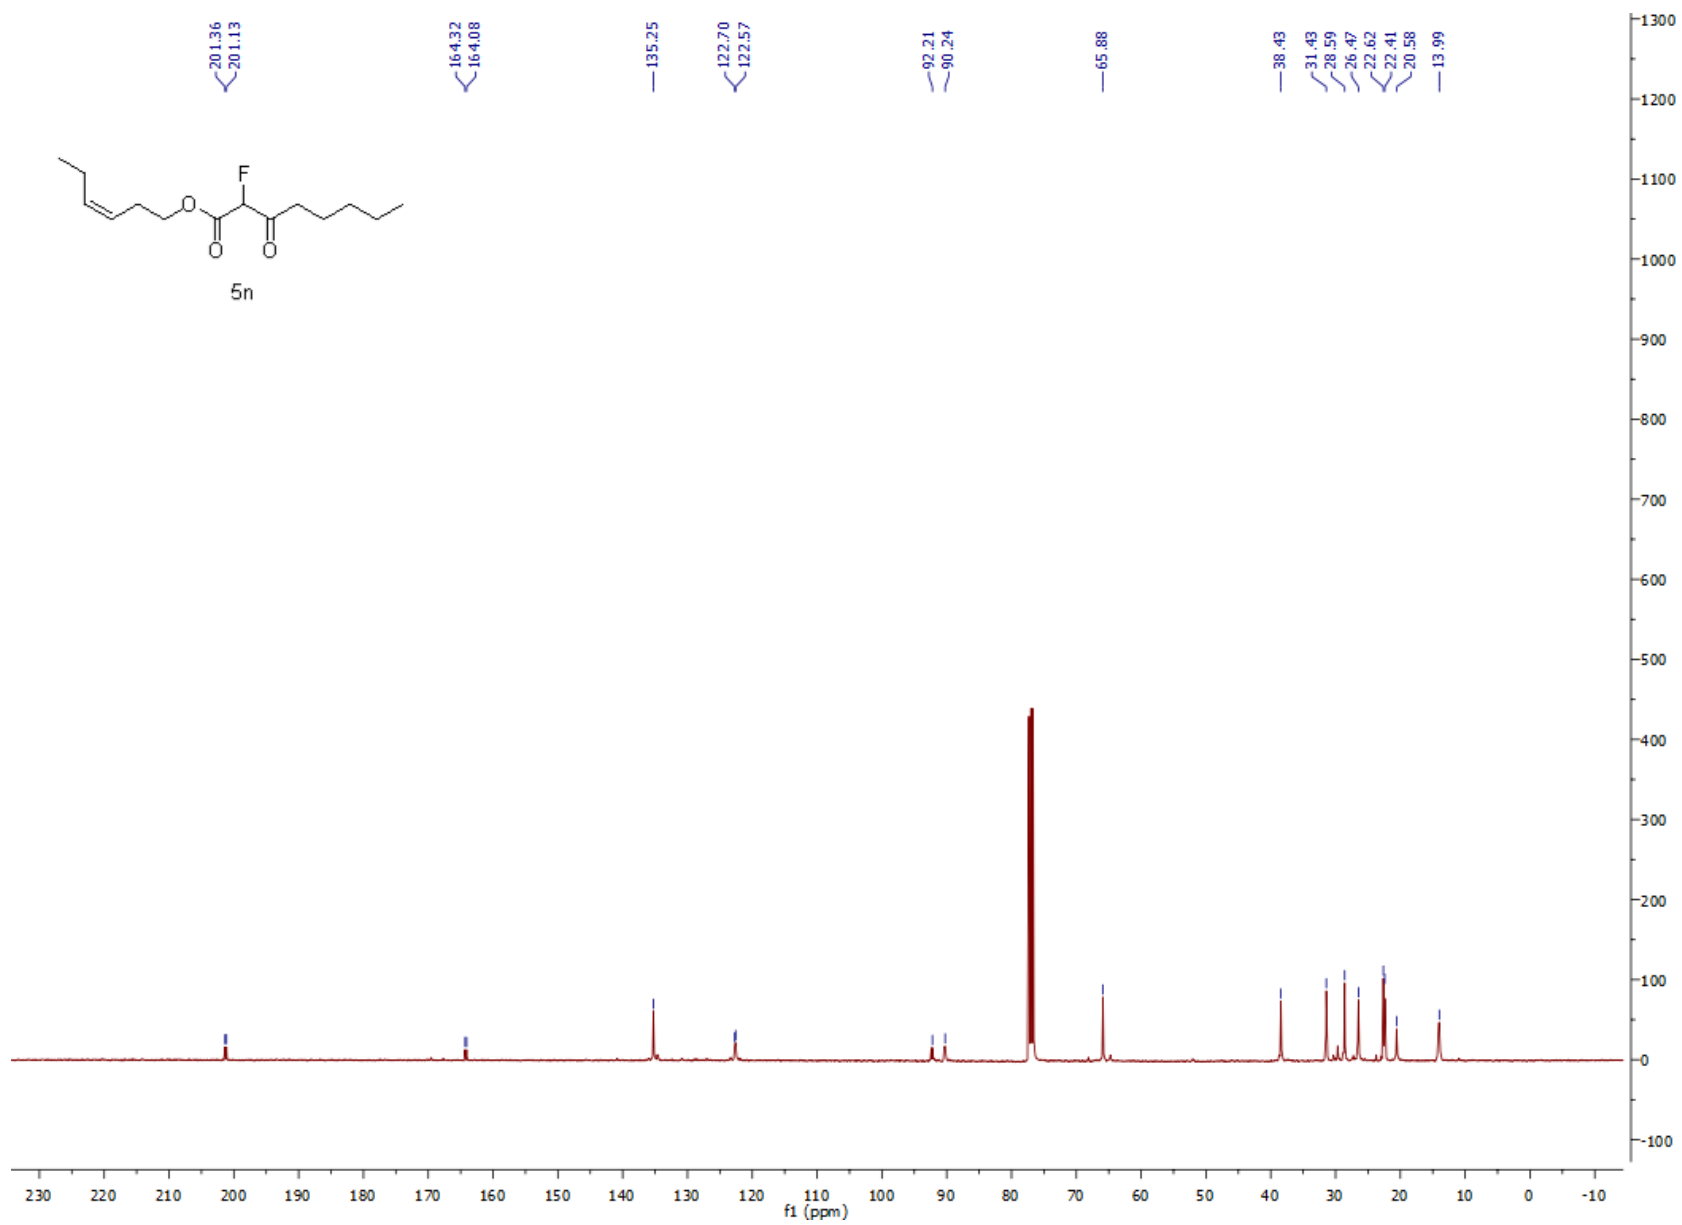

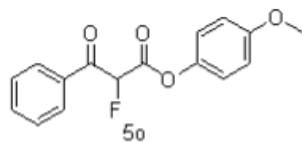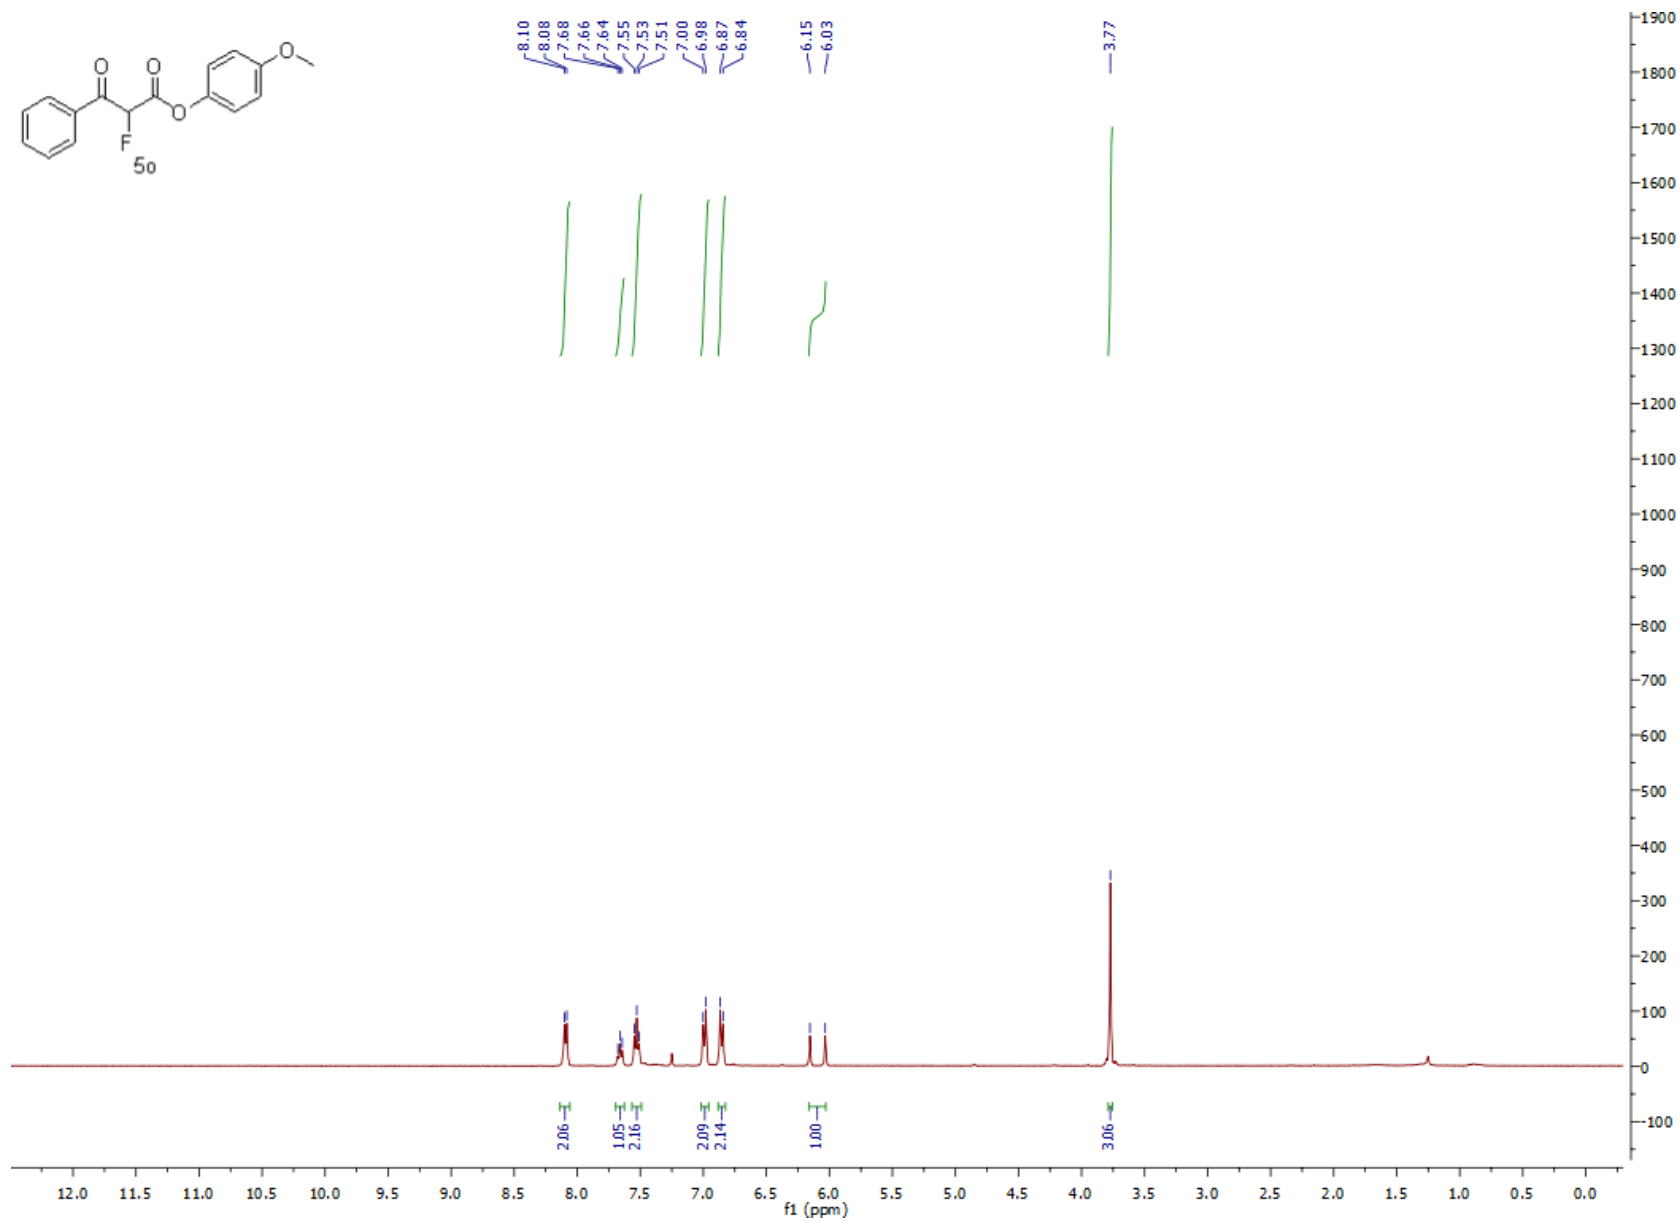

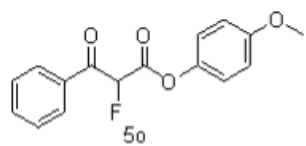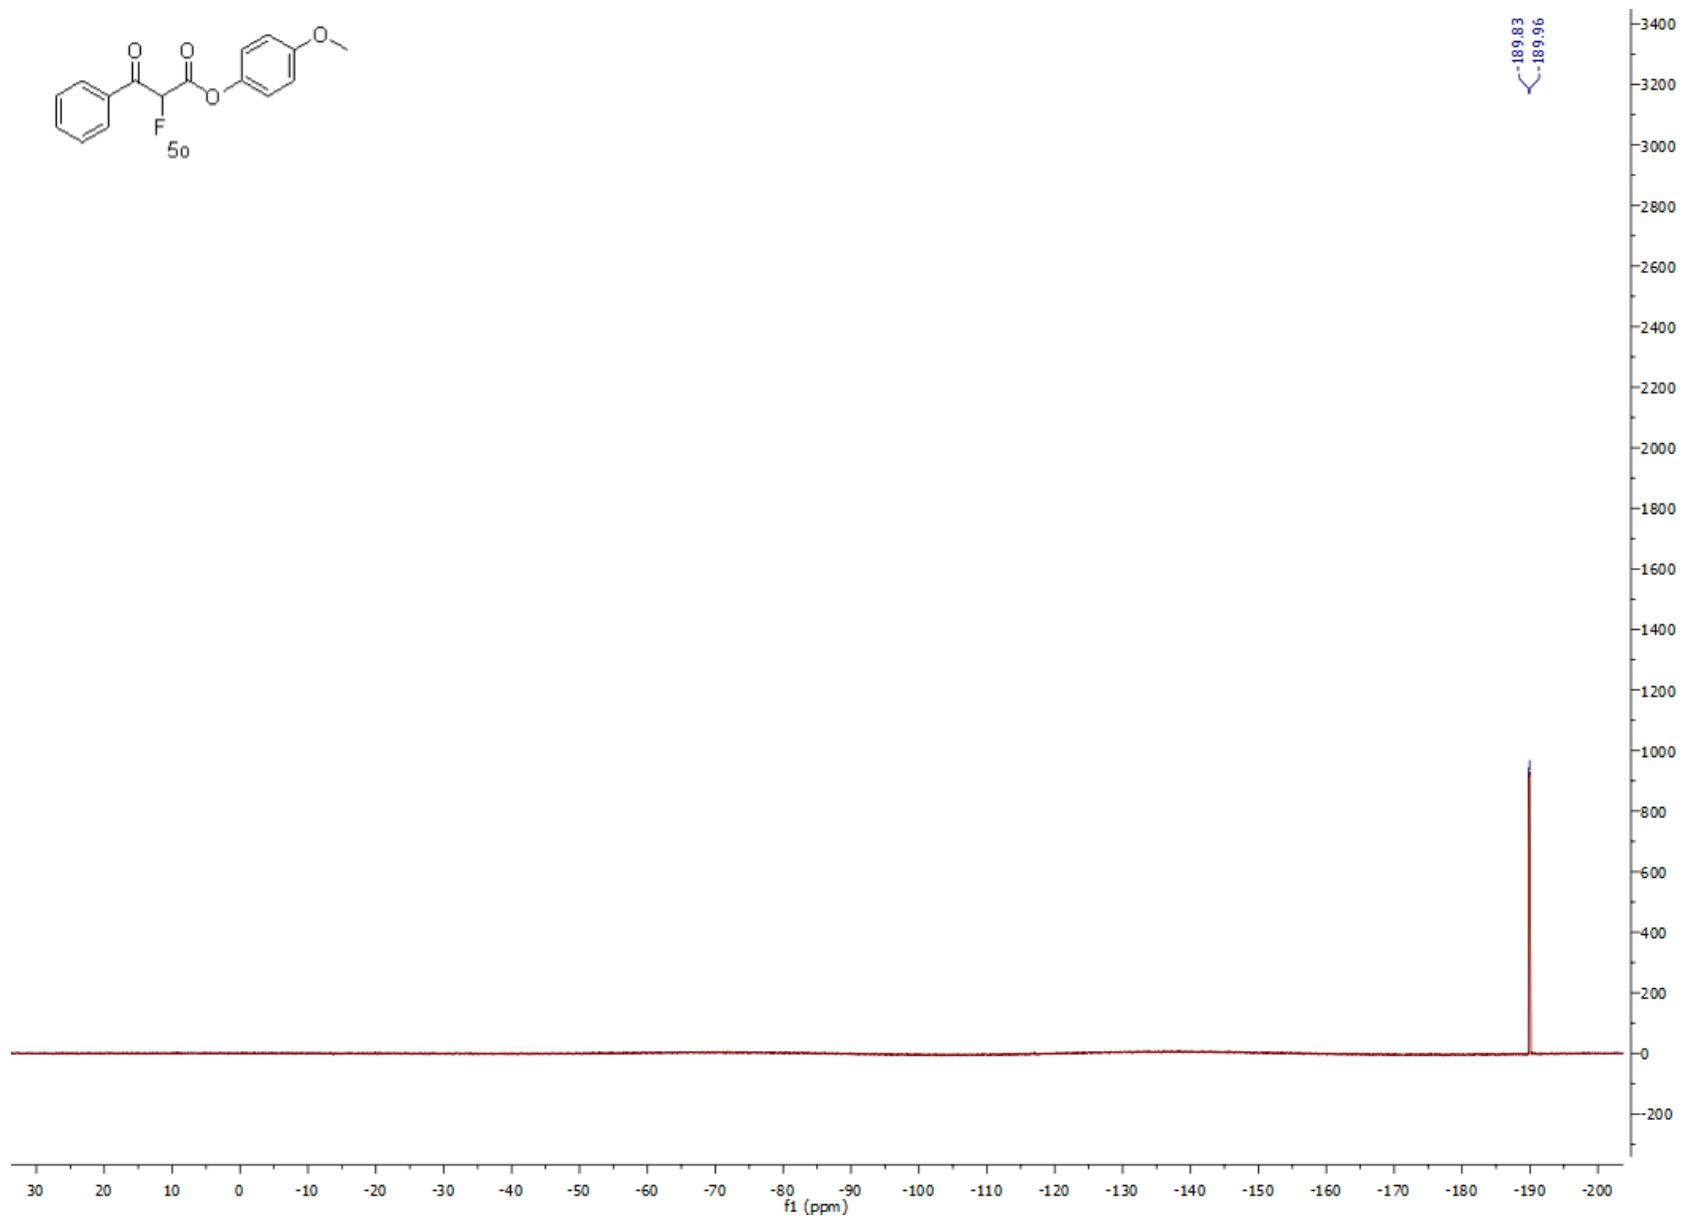



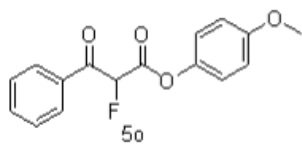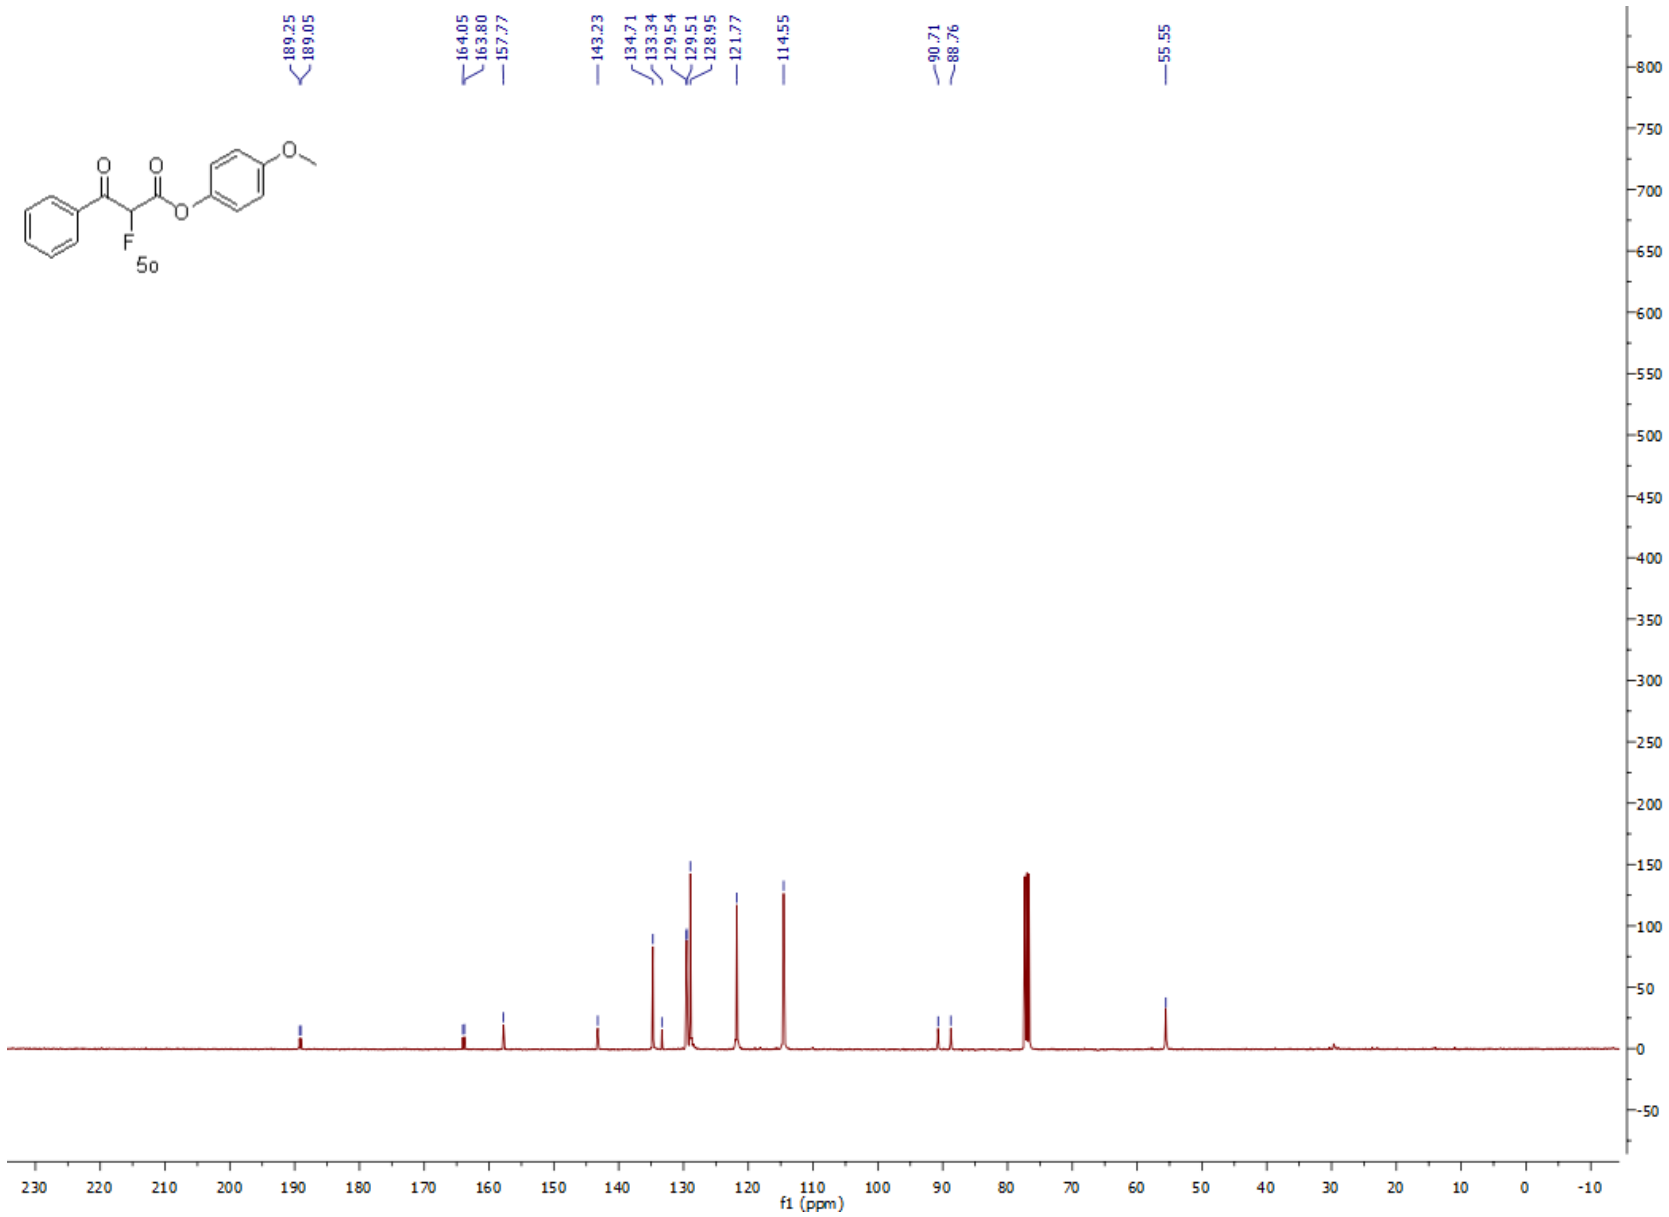

## 6. References

1. Kitamura, T.; Kuriki, S.; Morshed, M. H.; Hori, Y. *Org. Lett.* **2011**, *13*, 2392-2394.
2. Yoshida, M.; Fujikawa, K.; Sato, S.; Hara, S. *Arkivoc* **2003**, 36-42.
3. Hussain, I.; Yawer, M. A.; Lau, M.; Pundt, T.; Fischer, C.; Görls, H.; Langer, P. *Eur. J. Org. Chem.* **2008**, *2008*, 503-518.
4. Han, X.; Kwiatkowski, J.; Xue, F.; Huang, K.-W.; Lu, Y. *Angew. Chem. Int. Ed.* **2009**, *48*, 7604-7607.
